# Supplementary material for: Exploring the Causal Role of Gut Microbiota and Inflammatory Proteins in Neuromyelitis Optica Spectrum Disorder: a Mendelian randomization study with mediation analysis
Source: Research Square preprint supplement (doi:10.21203/rs.3.rs-5234042/v1), 2024-10-15
Supplement: Supplementary file 2 [file 7c05f690b43b2d07fa38b7df.xlsx]

## Sheet: supplement table list
Table S1: Details of all Gut microbiota.
Table S2: Detailed information of SNPs.
Table S3: TSMR results of GM with NMOSD
Table S4: TSMR heterogeneity of inflammatory proteins with NMOSD
Table S5: TSMR pleiotropy of inflammatory proteins with NMOSD
Table S6: Summary results of reverse MR (target GM on NMOSD).
Table S7: TSMR results of inflammatory proteins with NMOSD
Table S8: TSMR heterogeneity of inflammatory proteins with NMOSD
Table S9: TSMR pleiotropy of inflammatory proteins with NMOSD
Table S10: TSMR results of GM and positive inflammatory factors.
Table S11: The mediation proportion of mediators

## Sheet: Table S1
Table S1: Details of all Gut microbiota.
id	trait	ncase	group_name	year	author	consortium	sex	pmid	population	unit	sample_size	build	ncontrol	category	subcategory	ontology	note	mr	nsnp	priority	sd
ebi-a-GCST90016908	Gut microbiota abundance (class Actinobacteria id.419)		public	2021	Kurilshikov A	NA	NA	33462485	European	NA	14306	HG19/GRCh37		NA	NA	NA	NA	1	5684804	0
ebi-a-GCST90016909	Gut microbiota abundance (class Alphaproteobacteria id.2379)		public	2021	Kurilshikov A	NA	NA	33462485	European	NA	14306	HG19/GRCh37		NA	NA	NA	NA	1	5470627	0
ebi-a-GCST90016910	Gut microbiota abundance (class Bacilli id.1673)		public	2021	Kurilshikov A	NA	NA	33462485	European	NA	14306	HG19/GRCh37		NA	NA	NA	NA	1	5663902	0
ebi-a-GCST90016911	Gut microbiota abundance (class Bacteroidia id.912)		public	2021	Kurilshikov A	NA	NA	33462485	European	NA	14306	HG19/GRCh37		NA	NA	NA	NA	1	5729267	0
ebi-a-GCST90016912	Gut microbiota abundance (class Betaproteobacteria id.2867)		public	2021	Kurilshikov A	NA	NA	33462485	European	NA	14306	HG19/GRCh37		NA	NA	NA	NA	1	5707741	0
ebi-a-GCST90016913	Gut microbiota abundance (class Clostridia id.1859)		public	2021	Kurilshikov A	NA	NA	33462485	European	NA	14306	HG19/GRCh37		NA	NA	NA	NA	1	5729268	0
ebi-a-GCST90016914	Gut microbiota abundance (class Coriobacteriia id.809)		public	2021	Kurilshikov A	NA	NA	33462485	European	NA	14306	HG19/GRCh37		NA	NA	NA	NA	1	5698092	0
ebi-a-GCST90016915	Gut microbiota abundance (class Deltaproteobacteria id.3087)		public	2021	Kurilshikov A	NA	NA	33462485	European	NA	14306	HG19/GRCh37		NA	NA	NA	NA	1	5616854	0
ebi-a-GCST90016916	Gut microbiota abundance (class Erysipelotrichia id.2147)		public	2021	Kurilshikov A	NA	NA	33462485	European	NA	14306	HG19/GRCh37		NA	NA	NA	NA	1	5720820	0
ebi-a-GCST90016917	Gut microbiota abundance (class Gammaproteobacteria id.3303)		public	2021	Kurilshikov A	NA	NA	33462485	European	NA	14306	HG19/GRCh37		NA	NA	NA	NA	1	5689849	0
ebi-a-GCST90016918	Gut microbiota abundance (class Lentisphaeria id.2250)		public	2021	Kurilshikov A	NA	NA	33462485	European	NA	14306	HG19/GRCh37		NA	NA	NA	NA	1	5282234	0
ebi-a-GCST90016919	Gut microbiota abundance (class Melainabacteria id.1589)		public	2021	Kurilshikov A	NA	NA	33462485	European	NA	14306	HG19/GRCh37		NA	NA	NA	NA	1	5355624	0
ebi-a-GCST90016920	Gut microbiota abundance (class Methanobacteria id.119)		public	2021	Kurilshikov A	NA	NA	33462485	European	NA	14306	HG19/GRCh37		NA	NA	NA	NA	1	5118613	0
ebi-a-GCST90016921	Gut microbiota abundance (class Mollicutes id.3920)		public	2021	Kurilshikov A	NA	NA	33462485	European	NA	14306	HG19/GRCh37		NA	NA	NA	NA	1	5510407	0
ebi-a-GCST90016922	Gut microbiota abundance (class Negativicutes id.2164)		public	2021	Kurilshikov A	NA	NA	33462485	European	NA	14306	HG19/GRCh37		NA	NA	NA	NA	1	5721008	0
ebi-a-GCST90016923	Gut microbiota abundance (class Verrucomicrobiae id.4029)		public	2021	Kurilshikov A	NA	NA	33462485	European	NA	14306	HG19/GRCh37		NA	NA	NA	NA	1	5518011	0
ebi-a-GCST90016924	Gut microbiota abundance (family Acidaminococcaceae id.2166)		public	2021	Kurilshikov A	NA	NA	33462485	European	NA	14306	HG19/GRCh37		NA	NA	NA	NA	1	5547067	0
ebi-a-GCST90016925	Gut microbiota abundance (family Actinomycetaceae id.421)		public	2021	Kurilshikov A	NA	NA	33462485	European	NA	14306	HG19/GRCh37		NA	NA	NA	NA	1	5424030	0
ebi-a-GCST90016926	Gut microbiota abundance (family Alcaligenaceae id.2875)		public	2021	Kurilshikov A	NA	NA	33462485	European	NA	14306	HG19/GRCh37		NA	NA	NA	NA	1	5696994	0
ebi-a-GCST90016927	Gut microbiota abundance (family Bacteroidaceae id.917)		public	2021	Kurilshikov A	NA	NA	33462485	European	NA	14306	HG19/GRCh37		NA	NA	NA	NA	1	5729148	0
ebi-a-GCST90016928	Gut microbiota abundance (family Bacteroidales S24 7group id.11173)		public	2021	Kurilshikov A	NA	NA	33462485	European	NA	14306	HG19/GRCh37		NA	NA	NA	NA	1	5432872	0
ebi-a-GCST90016929	Gut microbiota abundance (family Bifidobacteriaceae id.433)		public	2021	Kurilshikov A	NA	NA	33462485	European	NA	14306	HG19/GRCh37		NA	NA	NA	NA	1	5668532	0
ebi-a-GCST90016930	Gut microbiota abundance (family Christensenellaceae id.1866)		public	2021	Kurilshikov A	NA	NA	33462485	European	NA	14306	HG19/GRCh37		NA	NA	NA	NA	1	1515865	0
ebi-a-GCST90016931	Gut microbiota abundance (family Clostridiaceae1 id.1869)		public	2021	Kurilshikov A	NA	NA	33462485	European	NA	14306	HG19/GRCh37		NA	NA	NA	NA	1	5598586	0
ebi-a-GCST90016932	Gut microbiota abundance (family Clostridiales vadin BB60 group id.11286)		public	2021	Kurilshikov A	NA	NA	33462485	European	NA	14306	HG19/GRCh37		NA	NA	NA	NA	1	5497800	0
ebi-a-GCST90016933	Gut microbiota abundance (family Coriobacteriaceae id.811)		public	2021	Kurilshikov A	NA	NA	33462485	European	NA	14306	HG19/GRCh37		NA	NA	NA	NA	1	5698092	0
ebi-a-GCST90016934	Gut microbiota abundance (family Defluviitaleaceae id.1924)		public	2021	Kurilshikov A	NA	NA	33462485	European	NA	14306	HG19/GRCh37		NA	NA	NA	NA	1	5440708	0
ebi-a-GCST90016935	Gut microbiota abundance (family Desulfovibrionaceae id.3169)		public	2021	Kurilshikov A	NA	NA	33462485	European	NA	14306	HG19/GRCh37		NA	NA	NA	NA	1	5616478	0
ebi-a-GCST90016936	Gut microbiota abundance (family Enterobacteriaceae id.3469)		public	2021	Kurilshikov A	NA	NA	33462485	European	NA	14306	HG19/GRCh37		NA	NA	NA	NA	1	5598485	0
ebi-a-GCST90016937	Gut microbiota abundance (family Erysipelotrichaceae id.2149)		public	2021	Kurilshikov A	NA	NA	33462485	European	NA	14306	HG19/GRCh37		NA	NA	NA	NA	1	5720820	0
ebi-a-GCST90016938	Gut microbiota abundance (family Family XI id.1936)		public	2021	Kurilshikov A	NA	NA	33462485	European	NA	14306	HG19/GRCh37		NA	NA	NA	NA	1	4330602	0
ebi-a-GCST90016939	Gut microbiota abundance (family Family XIII id.1957)		public	2021	Kurilshikov A	NA	NA	33462485	European	NA	14306	HG19/GRCh37		NA	NA	NA	NA	1	5620554	0
ebi-a-GCST90016940	Gut microbiota abundance (family Lachnospiraceae id.1987)		public	2021	Kurilshikov A	NA	NA	33462485	European	NA	14306	HG19/GRCh37		NA	NA	NA	NA	1	5729268	0
ebi-a-GCST90016941	Gut microbiota abundance (family Lactobacillaceae id.1836)		public	2021	Kurilshikov A	NA	NA	33462485	European	NA	14306	HG19/GRCh37		NA	NA	NA	NA	1	5401891	0
ebi-a-GCST90016942	Gut microbiota abundance (family Methanobacteriaceae id.121)		public	2021	Kurilshikov A	NA	NA	33462485	European	NA	14306	HG19/GRCh37		NA	NA	NA	NA	1	5118613	0
ebi-a-GCST90016943	Gut microbiota abundance (family Oxalobacteraceae id.2966)		public	2021	Kurilshikov A	NA	NA	33462485	European	NA	14306	HG19/GRCh37		NA	NA	NA	NA	1	5323881	0
ebi-a-GCST90016944	Gut microbiota abundance (family Pasteurellaceae id.3689)		public	2021	Kurilshikov A	NA	NA	33462485	European	NA	14306	HG19/GRCh37		NA	NA	NA	NA	1	5491834	0
ebi-a-GCST90016945	Gut microbiota abundance (family Peptococcaceae id.2024)		public	2021	Kurilshikov A	NA	NA	33462485	European	NA	14306	HG19/GRCh37		NA	NA	NA	NA	1	5490085	0
ebi-a-GCST90016946	Gut microbiota abundance (family Peptostreptococcaceae id.2042)		public	2021	Kurilshikov A	NA	NA	33462485	European	NA	14306	HG19/GRCh37		NA	NA	NA	NA	1	5643812	0
ebi-a-GCST90016947	Gut microbiota abundance (family Porphyromonadaceae id.943)		public	2021	Kurilshikov A	NA	NA	33462485	European	NA	14306	HG19/GRCh37		NA	NA	NA	NA	1	5716664	0
ebi-a-GCST90016948	Gut microbiota abundance (family Prevotellaceae id.960)		public	2021	Kurilshikov A	NA	NA	33462485	European	NA	14306	HG19/GRCh37		NA	NA	NA	NA	1	5643858	0
ebi-a-GCST90016949	Gut microbiota abundance (family Rhodospirillaceae id.2717)		public	2021	Kurilshikov A	NA	NA	33462485	European	NA	14306	HG19/GRCh37		NA	NA	NA	NA	1	5444973	0
ebi-a-GCST90016950	Gut microbiota abundance (family Rikenellaceae id.967)		public	2021	Kurilshikov A	NA	NA	33462485	European	NA	14306	HG19/GRCh37		NA	NA	NA	NA	1	5665279	0
ebi-a-GCST90016951	Gut microbiota abundance (family Ruminococcaceae id.2050)		public	2021	Kurilshikov A	NA	NA	33462485	European	NA	14306	HG19/GRCh37		NA	NA	NA	NA	1	5729189	0
ebi-a-GCST90016952	Gut microbiota abundance (family Streptococcaceae id.1850)		public	2021	Kurilshikov A	NA	NA	33462485	European	NA	14306	HG19/GRCh37		NA	NA	NA	NA	1	5648128	0
ebi-a-GCST90016956	Gut microbiota abundance (family Veillonellaceae id.2172)		public	2021	Kurilshikov A	NA	NA	33462485	European	NA	14306	HG19/GRCh37		NA	NA	NA	NA	1	5688519	0
ebi-a-GCST90016957	Gut microbiota abundance (family Verrucomicrobiaceae id.4036)		public	2021	Kurilshikov A	NA	NA	33462485	European	NA	14306	HG19/GRCh37		NA	NA	NA	NA	1	5518011	0
ebi-a-GCST90016958	Gut microbiota abundance (family Victivallaceae id.2255)		public	2021	Kurilshikov A	NA	NA	33462485	European	NA	14306	HG19/GRCh37		NA	NA	NA	NA	1	5184073	0
ebi-a-GCST90016959	Gut microbiota abundance (genus Actinomyces id.423)		public	2021	Kurilshikov A	NA	NA	33462485	European	NA	14306	HG19/GRCh37		NA	NA	NA	NA	1	5417207	0
ebi-a-GCST90016960	Gut microbiota abundance (genus Adlercreutzia id.812)		public	2021	Kurilshikov A	NA	NA	33462485	European	NA	14306	HG19/GRCh37		NA	NA	NA	NA	1	5437332	0
ebi-a-GCST90016961	Gut microbiota abundance (genus Akkermansia id.4037)		public	2021	Kurilshikov A	NA	NA	33462485	European	NA	14306	HG19/GRCh37		NA	NA	NA	NA	1	5518001	0
ebi-a-GCST90016962	Gut microbiota abundance (genus Alistipes id.968)		public	2021	Kurilshikov A	NA	NA	33462485	European	NA	14306	HG19/GRCh37		NA	NA	NA	NA	1	5662599	0
ebi-a-GCST90016963	Gut microbiota abundance (genus Allisonella id.2174)		public	2021	Kurilshikov A	NA	NA	33462485	European	NA	14306	HG19/GRCh37		NA	NA	NA	NA	1	4116508	0
ebi-a-GCST90016964	Gut microbiota abundance (genus Alloprevotella id.961)		public	2021	Kurilshikov A	NA	NA	33462485	European	NA	14306	HG19/GRCh37		NA	NA	NA	NA	1	3047413	0
ebi-a-GCST90016965	Gut microbiota abundance (genus Anaerofilum id.2053)		public	2021	Kurilshikov A	NA	NA	33462485	European	NA	14306	HG19/GRCh37		NA	NA	NA	NA	1	5321133	0
ebi-a-GCST90016966	Gut microbiota abundance (genus Anaerostipes id.1991)		public	2021	Kurilshikov A	NA	NA	33462485	European	NA	14306	HG19/GRCh37		NA	NA	NA	NA	1	5691265	0
ebi-a-GCST90016967	Gut microbiota abundance (genus Anaerotruncus id.2054)		public	2021	Kurilshikov A	NA	NA	33462485	European	NA	14306	HG19/GRCh37		NA	NA	NA	NA	1	5646976	0
ebi-a-GCST90016968	Gut microbiota abundance (genus Bacteroides id.918)		public	2021	Kurilshikov A	NA	NA	33462485	European	NA	14306	HG19/GRCh37		NA	NA	NA	NA	1	5729148	0
ebi-a-GCST90016969	Gut microbiota abundance (genus Barnesiella id.944)		public	2021	Kurilshikov A	NA	NA	33462485	European	NA	14306	HG19/GRCh37		NA	NA	NA	NA	1	5561375	0
ebi-a-GCST90016970	Gut microbiota abundance (genus Bifidobacterium id.436)		public	2021	Kurilshikov A	NA	NA	33462485	European	NA	14306	HG19/GRCh37		NA	NA	NA	NA	1	5666549	0
ebi-a-GCST90016971	Gut microbiota abundance (genus Bilophila id.3170)		public	2021	Kurilshikov A	NA	NA	33462485	European	NA	14306	HG19/GRCh37		NA	NA	NA	NA	1	5552365	0
ebi-a-GCST90016972	Gut microbiota abundance (genus Blautia id.1992)		public	2021	Kurilshikov A	NA	NA	33462485	European	NA	14306	HG19/GRCh37		NA	NA	NA	NA	1	335714	0
ebi-a-GCST90016973	Gut microbiota abundance (genus Butyricicoccus id.2055)		public	2021	Kurilshikov A	NA	NA	33462485	European	NA	14306	HG19/GRCh37		NA	NA	NA	NA	1	5648432	0
ebi-a-GCST90016974	Gut microbiota abundance (genus Butyricimonas id.945)		public	2021	Kurilshikov A	NA	NA	33462485	European	NA	14306	HG19/GRCh37		NA	NA	NA	NA	1	5487648	0
ebi-a-GCST90016975	Gut microbiota abundance (genus Butyrivibrio id.1993)		public	2021	Kurilshikov A	NA	NA	33462485	European	NA	14306	HG19/GRCh37		NA	NA	NA	NA	1	5096306	0
ebi-a-GCST90016976	Gut microbiota abundance (genus Candidatus Soleaferrea id.11350)		public	2021	Kurilshikov A	NA	NA	33462485	European	NA	14306	HG19/GRCh37		NA	NA	NA	NA	1	5372145	0
ebi-a-GCST90016977	Gut microbiota abundance (genus Catenibacterium id.2153)		public	2021	Kurilshikov A	NA	NA	33462485	European	NA	14306	HG19/GRCh37		NA	NA	NA	NA	1	4089327	0
ebi-a-GCST90016978	Gut microbiota abundance (genus Christensenellaceae R 7group id.11283)		public	2021	Kurilshikov A	NA	NA	33462485	European	NA	14306	HG19/GRCh37		NA	NA	NA	NA	1	5645310	0
ebi-a-GCST90016979	Gut microbiota abundance (genus Clostridium innocuum group id.14397)		public	2021	Kurilshikov A	NA	NA	33462485	European	NA	14306	HG19/GRCh37		NA	NA	NA	NA	1	5231958	0
ebi-a-GCST90016980	Gut microbiota abundance (genus Clostridium sensustricto1 id.1873)		public	2021	Kurilshikov A	NA	NA	33462485	European	NA	14306	HG19/GRCh37		NA	NA	NA	NA	1	5594934	0
ebi-a-GCST90016981	Gut microbiota abundance (genus Collinsella id.815)		public	2021	Kurilshikov A	NA	NA	33462485	European	NA	14306	HG19/GRCh37		NA	NA	NA	NA	1	5563963	0
ebi-a-GCST90016982	Gut microbiota abundance (genus Coprobacter id.949)		public	2021	Kurilshikov A	NA	NA	33462485	European	NA	14306	HG19/GRCh37		NA	NA	NA	NA	1	5394658	0
ebi-a-GCST90016983	Gut microbiota abundance (genus Coprococcus1 id.11301)		public	2021	Kurilshikov A	NA	NA	33462485	European	NA	14306	HG19/GRCh37		NA	NA	NA	NA	1	5649452	0
ebi-a-GCST90016984	Gut microbiota abundance (genus Coprococcus2 id.11302)		public	2021	Kurilshikov A	NA	NA	33462485	European	NA	14306	HG19/GRCh37		NA	NA	NA	NA	1	5525173	0
ebi-a-GCST90016985	Gut microbiota abundance (genus Coprococcus3 id.11303)		public	2021	Kurilshikov A	NA	NA	33462485	European	NA	14306	HG19/GRCh37		NA	NA	NA	NA	1	5637737	0
ebi-a-GCST90016986	Gut microbiota abundance (genus Defluviitaleaceae UCG011 id.11287)		public	2021	Kurilshikov A	NA	NA	33462485	European	NA	14306	HG19/GRCh37		NA	NA	NA	NA	1	5440169	0
ebi-a-GCST90016987	Gut microbiota abundance (genus Desulfovibrio id.3173)		public	2021	Kurilshikov A	NA	NA	33462485	European	NA	14306	HG19/GRCh37		NA	NA	NA	NA	1	5459163	0
ebi-a-GCST90016988	Gut microbiota abundance (genus Dialister id.2183)		public	2021	Kurilshikov A	NA	NA	33462485	European	NA	14306	HG19/GRCh37		NA	NA	NA	NA	1	5553148	0
ebi-a-GCST90016989	Gut microbiota abundance (genus Dorea id.1997)		public	2021	Kurilshikov A	NA	NA	33462485	European	NA	14306	HG19/GRCh37		NA	NA	NA	NA	1	5702812	0
ebi-a-GCST90016990	Gut microbiota abundance (genus Eggerthella id.819)		public	2021	Kurilshikov A	NA	NA	33462485	European	NA	14306	HG19/GRCh37		NA	NA	NA	NA	1	5317951	0
ebi-a-GCST90016991	Gut microbiota abundance (genus Eisenbergiella id.11304)		public	2021	Kurilshikov A	NA	NA	33462485	European	NA	14306	HG19/GRCh37		NA	NA	NA	NA	1	5348517	0
ebi-a-GCST90016992	Gut microbiota abundance (genus Enterorhabdus id.820)		public	2021	Kurilshikov A	NA	NA	33462485	European	NA	14306	HG19/GRCh37		NA	NA	NA	NA	1	5416385	0
ebi-a-GCST90016993	Gut microbiota abundance (genus Erysipelatoclostridium id.11381)		public	2021	Kurilshikov A	NA	NA	33462485	European	NA	14306	HG19/GRCh37		NA	NA	NA	NA	1	5478224	0
ebi-a-GCST90016994	Gut microbiota abundance (genus Erysipelotrichaceae UCG003 id.11384)		public	2021	Kurilshikov A	NA	NA	33462485	European	NA	14306	HG19/GRCh37		NA	NA	NA	NA	1	563252	0
ebi-a-GCST90016995	Gut microbiota abundance (genus Escherichia Shigella id.3504)		public	2021	Kurilshikov A	NA	NA	33462485	European	NA	14306	HG19/GRCh37		NA	NA	NA	NA	1	5537082	0
ebi-a-GCST90016996	Gut microbiota abundance (genus Eubacterium brachy group id.11296)		public	2021	Kurilshikov A	NA	NA	33462485	European	NA	14306	HG19/GRCh37		NA	NA	NA	NA	1	5221253	0
ebi-a-GCST90016997	Gut microbiota abundance (genus Eubacterium coprostanoligenes group id.11375)		public	2021	Kurilshikov A	NA	NA	33462485	European	NA	14306	HG19/GRCh37		NA	NA	NA	NA	1	5699448	0
ebi-a-GCST90016998	Gut microbiota abundance (genus Eubacterium eligens group id.14372)		public	2021	Kurilshikov A	NA	NA	33462485	European	NA	14306	HG19/GRCh37		NA	NA	NA	NA	1	5631614	0
ebi-a-GCST90016999	Gut microbiota abundance (genus Eubacterium fissicatena group id.14373)		public	2021	Kurilshikov A	NA	NA	33462485	European	NA	14306	HG19/GRCh37		NA	NA	NA	NA	1	5159588	0
ebi-a-GCST90017000	Gut microbiota abundance (genus Eubacterium hallii group id.11338)		public	2021	Kurilshikov A	NA	NA	33462485	European	NA	14306	HG19/GRCh37		NA	NA	NA	NA	1	5686593	0
ebi-a-GCST90017001	Gut microbiota abundance (genus Eubacterium nodatum group id.11297)		public	2021	Kurilshikov A	NA	NA	33462485	European	NA	14306	HG19/GRCh37		NA	NA	NA	NA	1	5050598	0
ebi-a-GCST90017002	Gut microbiota abundance (genus Eubacterium oxidoreducens group id.11339)		public	2021	Kurilshikov A	NA	NA	33462485	European	NA	14306	HG19/GRCh37		NA	NA	NA	NA	1	5324438	0
ebi-a-GCST90017003	Gut microbiota abundance (genus Eubacterium rectale group id.14374)		public	2021	Kurilshikov A	NA	NA	33462485	European	NA	14306	HG19/GRCh37		NA	NA	NA	NA	1	5708381	0
ebi-a-GCST90017004	Gut microbiota abundance (genus Eubacterium ruminantium group id.11340)		public	2021	Kurilshikov A	NA	NA	33462485	European	NA	14306	HG19/GRCh37		NA	NA	NA	NA	1	5427661	0
ebi-a-GCST90017005	Gut microbiota abundance (genus Eubacterium ventriosum group id.11341)		public	2021	Kurilshikov A	NA	NA	33462485	European	NA	14306	HG19/GRCh37		NA	NA	NA	NA	1	5603754	0
ebi-a-GCST90017006	Gut microbiota abundance (genus Eubacterium xylanophilum group id.14375)		public	2021	Kurilshikov A	NA	NA	33462485	European	NA	14306	HG19/GRCh37		NA	NA	NA	NA	1	5543813	0
ebi-a-GCST90017007	Gut microbiota abundance (genus Faecalibacterium id.2057)		public	2021	Kurilshikov A	NA	NA	33462485	European	NA	14306	HG19/GRCh37		NA	NA	NA	NA	1	5720140	0
ebi-a-GCST90017008	Gut microbiota abundance (genus Family XIII AD3011 group id.11293)		public	2021	Kurilshikov A	NA	NA	33462485	European	NA	14306	HG19/GRCh37		NA	NA	NA	NA	1	5577002	0
ebi-a-GCST90017009	Gut microbiota abundance (genus Family XIII UCG001 id.11294)		public	2021	Kurilshikov A	NA	NA	33462485	European	NA	14306	HG19/GRCh37		NA	NA	NA	NA	1	5521084	0
ebi-a-GCST90017010	Gut microbiota abundance (genus Flavonifractor id.2059)		public	2021	Kurilshikov A	NA	NA	33462485	European	NA	14306	HG19/GRCh37		NA	NA	NA	NA	1	5510045	0
ebi-a-GCST90017011	Gut microbiota abundance (genus Fusicatenibacter id.11305)		public	2021	Kurilshikov A	NA	NA	33462485	European	NA	14306	HG19/GRCh37		NA	NA	NA	NA	1	5697232	0
ebi-a-GCST90017012	Gut microbiota abundance (genus Gordonibacter id.821)		public	2021	Kurilshikov A	NA	NA	33462485	European	NA	14306	HG19/GRCh37		NA	NA	NA	NA	1	5165457	0
ebi-a-GCST90017013	Gut microbiota abundance (genus Haemophilus id.3698)		public	2021	Kurilshikov A	NA	NA	33462485	European	NA	14306	HG19/GRCh37		NA	NA	NA	NA	1	5481944	0
ebi-a-GCST90017014	Gut microbiota abundance (genus Holdemanella id.11393)		public	2021	Kurilshikov A	NA	NA	33462485	European	NA	14306	HG19/GRCh37		NA	NA	NA	NA	1	5421763	0
ebi-a-GCST90017015	Gut microbiota abundance (genus Holdemania id.2157)		public	2021	Kurilshikov A	NA	NA	33462485	European	NA	14306	HG19/GRCh37		NA	NA	NA	NA	1	5464928	0
ebi-a-GCST90017016	Gut microbiota abundance (genus Howardella id.2000)		public	2021	Kurilshikov A	NA	NA	33462485	European	NA	14306	HG19/GRCh37		NA	NA	NA	NA	1	5174541	0
ebi-a-GCST90017017	Gut microbiota abundance (genus Hungatella id.11306)		public	2021	Kurilshikov A	NA	NA	33462485	European	NA	14306	HG19/GRCh37		NA	NA	NA	NA	1	5211608	0
ebi-a-GCST90017018	Gut microbiota abundance (genus Intestinibacter id.11345)		public	2021	Kurilshikov A	NA	NA	33462485	European	NA	14306	HG19/GRCh37		NA	NA	NA	NA	1	5535009	0
ebi-a-GCST90017019	Gut microbiota abundance (genus Intestinimonas id.2062)		public	2021	Kurilshikov A	NA	NA	33462485	European	NA	14306	HG19/GRCh37		NA	NA	NA	NA	1	5540147	0
ebi-a-GCST90017020	Gut microbiota abundance (genus Lachnoclostridium id.11308)		public	2021	Kurilshikov A	NA	NA	33462485	European	NA	14306	HG19/GRCh37		NA	NA	NA	NA	1	5714724	0
ebi-a-GCST90017029	Gut microbiota abundance (genus Lachnospira id.2004)		public	2021	Kurilshikov A	NA	NA	33462485	European	NA	14306	HG19/GRCh37		NA	NA	NA	NA	1	462269	0
ebi-a-GCST90017021	Gut microbiota abundance (genus Lachnospiraceae FCS020 group id.11314)		public	2021	Kurilshikov A	NA	NA	33462485	European	NA	14306	HG19/GRCh37		NA	NA	NA	NA	1	5547835	0
ebi-a-GCST90017022	Gut microbiota abundance (genus Lachnospiraceae NC2004 group id.11316)		public	2021	Kurilshikov A	NA	NA	33462485	European	NA	14306	HG19/GRCh37		NA	NA	NA	NA	1	5369940	0
ebi-a-GCST90017023	Gut microbiota abundance (genus Lachnospiraceae ND3007 group id.11317)		public	2021	Kurilshikov A	NA	NA	33462485	European	NA	14306	HG19/GRCh37		NA	NA	NA	NA	1	5629458	0
ebi-a-GCST90017024	Gut microbiota abundance (genus Lachnospiraceae NK4A136 group id.11319)		public	2021	Kurilshikov A	NA	NA	33462485	European	NA	14306	HG19/GRCh37		NA	NA	NA	NA	1	5663428	0
ebi-a-GCST90017025	Gut microbiota abundance (genus Lachnospiraceae UCG001 id.11321)		public	2021	Kurilshikov A	NA	NA	33462485	European	NA	14306	HG19/GRCh37		NA	NA	NA	NA	1	5482153	0
ebi-a-GCST90017026	Gut microbiota abundance (genus Lachnospiraceae UCG004 id.11324)		public	2021	Kurilshikov A	NA	NA	33462485	European	NA	14306	HG19/GRCh37		NA	NA	NA	NA	1	5633244	0
ebi-a-GCST90017027	Gut microbiota abundance (genus Lachnospiraceae UCG008 id.11328)		public	2021	Kurilshikov A	NA	NA	33462485	European	NA	14306	HG19/GRCh37		NA	NA	NA	NA	1	5401028	0
ebi-a-GCST90017028	Gut microbiota abundance (genus Lachnospiraceae UCG010 id.11330)		public	2021	Kurilshikov A	NA	NA	33462485	European	NA	14306	HG19/GRCh37		NA	NA	NA	NA	1	5565113	0
ebi-a-GCST90017030	Gut microbiota abundance (genus Lactobacillus id.1837)		public	2021	Kurilshikov A	NA	NA	33462485	European	NA	14306	HG19/GRCh37		NA	NA	NA	NA	1	5398287	0
ebi-a-GCST90017031	Gut microbiota abundance (genus Lactococcus id.1851)		public	2021	Kurilshikov A	NA	NA	33462485	European	NA	14306	HG19/GRCh37		NA	NA	NA	NA	1	5200746	0
ebi-a-GCST90017032	Gut microbiota abundance (genus Marvinbryantia id.2005)		public	2021	Kurilshikov A	NA	NA	33462485	European	NA	14306	HG19/GRCh37		NA	NA	NA	NA	1	5507087	0
ebi-a-GCST90017033	Gut microbiota abundance (genus Methanobrevibacter id.123)		public	2021	Kurilshikov A	NA	NA	33462485	European	NA	14306	HG19/GRCh37		NA	NA	NA	NA	1	5092705	0
ebi-a-GCST90017034	Gut microbiota abundance (genus Odoribacter id.952)		public	2021	Kurilshikov A	NA	NA	33462485	European	NA	14306	HG19/GRCh37		NA	NA	NA	NA	1	5584164	0
ebi-a-GCST90017035	Gut microbiota abundance (genus Olsenella id.822)		public	2021	Kurilshikov A	NA	NA	33462485	European	NA	14306	HG19/GRCh37		NA	NA	NA	NA	1	5215565	0
ebi-a-GCST90017036	Gut microbiota abundance (genus Oscillibacter id.2063)		public	2021	Kurilshikov A	NA	NA	33462485	European	NA	14306	HG19/GRCh37		NA	NA	NA	NA	1	5450090	0
ebi-a-GCST90017037	Gut microbiota abundance (genus Oscillospira id.2064)		public	2021	Kurilshikov A	NA	NA	33462485	European	NA	14306	HG19/GRCh37		NA	NA	NA	NA	1	5487907	0
ebi-a-GCST90017038	Gut microbiota abundance (genus Oxalobacter id.2978)		public	2021	Kurilshikov A	NA	NA	33462485	European	NA	14306	HG19/GRCh37		NA	NA	NA	NA	1	5290208	0
ebi-a-GCST90017039	Gut microbiota abundance (genus Parabacteroides id.954)		public	2021	Kurilshikov A	NA	NA	33462485	European	NA	14306	HG19/GRCh37		NA	NA	NA	NA	1	5709019	0
ebi-a-GCST90017040	Gut microbiota abundance (genus Paraprevotella id.962)		public	2021	Kurilshikov A	NA	NA	33462485	European	NA	14306	HG19/GRCh37		NA	NA	NA	NA	1	5407469	0
ebi-a-GCST90017041	Gut microbiota abundance (genus Parasutterella id.2892)		public	2021	Kurilshikov A	NA	NA	33462485	European	NA	14306	HG19/GRCh37		NA	NA	NA	NA	1	5512811	0
ebi-a-GCST90017042	Gut microbiota abundance (genus Peptococcus id.2037)		public	2021	Kurilshikov A	NA	NA	33462485	European	NA	14306	HG19/GRCh37		NA	NA	NA	NA	1	5350051	0
ebi-a-GCST90017043	Gut microbiota abundance (genus Phascolarctobacterium id.2168)		public	2021	Kurilshikov A	NA	NA	33462485	European	NA	14306	HG19/GRCh37		NA	NA	NA	NA	1	5509695	0
ebi-a-GCST90017044	Gut microbiota abundance (genus Prevotella7 id.11182)		public	2021	Kurilshikov A	NA	NA	33462485	European	NA	14306	HG19/GRCh37		NA	NA	NA	NA	1	5089245	0
ebi-a-GCST90017045	Gut microbiota abundance (genus Prevotella9 id.11183)		public	2021	Kurilshikov A	NA	NA	33462485	European	NA	14306	HG19/GRCh37		NA	NA	NA	NA	1	5535200	0
ebi-a-GCST90017046	Gut microbiota abundance (genus Rikenellaceae RC9 gut group id.11191)		public	2021	Kurilshikov A	NA	NA	33462485	European	NA	14306	HG19/GRCh37		NA	NA	NA	NA	1	4945903	0
ebi-a-GCST90017047	Gut microbiota abundance (genus Romboutsia id.11347)		public	2021	Kurilshikov A	NA	NA	33462485	European	NA	14306	HG19/GRCh37		NA	NA	NA	NA	1	5594534	0
ebi-a-GCST90017048	Gut microbiota abundance (genus Roseburia id.2012)		public	2021	Kurilshikov A	NA	NA	33462485	European	NA	14306	HG19/GRCh37		NA	NA	NA	NA	1	5712148	0
ebi-a-GCST90017049	Gut microbiota abundance (genus Ruminiclostridium5 id.11355)		public	2021	Kurilshikov A	NA	NA	33462485	European	NA	14306	HG19/GRCh37		NA	NA	NA	NA	1	5653350	0
ebi-a-GCST90017050	Gut microbiota abundance (genus Ruminiclostridium6 id.11356)		public	2021	Kurilshikov A	NA	NA	33462485	European	NA	14306	HG19/GRCh37		NA	NA	NA	NA	1	5557669	0
ebi-a-GCST90017051	Gut microbiota abundance (genus Ruminiclostridium9 id.11357)		public	2021	Kurilshikov A	NA	NA	33462485	European	NA	14306	HG19/GRCh37		NA	NA	NA	NA	1	5649657	0
ebi-a-GCST90017052	Gut microbiota abundance (genus Ruminococcaceae NK4A214 group id.11358)		public	2021	Kurilshikov A	NA	NA	33462485	European	NA	14306	HG19/GRCh37		NA	NA	NA	NA	1	5616365	0
ebi-a-GCST90017053	Gut microbiota abundance (genus Ruminococcaceae UCG002 id.11360)		public	2021	Kurilshikov A	NA	NA	33462485	European	NA	14306	HG19/GRCh37		NA	NA	NA	NA	1	5694947	0
ebi-a-GCST90017054	Gut microbiota abundance (genus Ruminococcaceae UCG003 id.11361)		public	2021	Kurilshikov A	NA	NA	33462485	European	NA	14306	HG19/GRCh37		NA	NA	NA	NA	1	5624730	0
ebi-a-GCST90017055	Gut microbiota abundance (genus Ruminococcaceae UCG004 id.11362)		public	2021	Kurilshikov A	NA	NA	33462485	European	NA	14306	HG19/GRCh37		NA	NA	NA	NA	1	5478416	0
ebi-a-GCST90017056	Gut microbiota abundance (genus Ruminococcaceae UCG005 id.11363)		public	2021	Kurilshikov A	NA	NA	33462485	European	NA	14306	HG19/GRCh37		NA	NA	NA	NA	1	5638483	0
ebi-a-GCST90017057	Gut microbiota abundance (genus Ruminococcaceae UCG009 id.11366)		public	2021	Kurilshikov A	NA	NA	33462485	European	NA	14306	HG19/GRCh37		NA	NA	NA	NA	1	5418432	0
ebi-a-GCST90017058	Gut microbiota abundance (genus Ruminococcaceae UCG010 id.11367)		public	2021	Kurilshikov A	NA	NA	33462485	European	NA	14306	HG19/GRCh37		NA	NA	NA	NA	1	5545122	0
ebi-a-GCST90017059	Gut microbiota abundance (genus Ruminococcaceae UCG011 id.11368)		public	2021	Kurilshikov A	NA	NA	33462485	European	NA	14306	HG19/GRCh37		NA	NA	NA	NA	1	5176480	0
ebi-a-GCST90017060	Gut microbiota abundance (genus Ruminococcaceae UCG013 id.11370)		public	2021	Kurilshikov A	NA	NA	33462485	European	NA	14306	HG19/GRCh37		NA	NA	NA	NA	1	5642029	0
ebi-a-GCST90017061	Gut microbiota abundance (genus Ruminococcaceae UCG014 id.11371)		public	2021	Kurilshikov A	NA	NA	33462485	European	NA	14306	HG19/GRCh37		NA	NA	NA	NA	1	5582406	0
ebi-a-GCST90017064	Gut microbiota abundance (genus Ruminococcus gauvreauii group id.11342)		public	2021	Kurilshikov A	NA	NA	33462485	European	NA	14306	HG19/GRCh37		NA	NA	NA	NA	1	5572328	0
ebi-a-GCST90017065	Gut microbiota abundance (genus Ruminococcus gnavus group id.14376)		public	2021	Kurilshikov A	NA	NA	33462485	European	NA	14306	HG19/GRCh37		NA	NA	NA	NA	1	5381061	0
ebi-a-GCST90017066	Gut microbiota abundance (genus Ruminococcus torques group id.14377)		public	2021	Kurilshikov A	NA	NA	33462485	European	NA	14306	HG19/GRCh37		NA	NA	NA	NA	1	5709224	0
ebi-a-GCST90017062	Gut microbiota abundance (genus Ruminococcus1 id.11373)		public	2021	Kurilshikov A	NA	NA	33462485	European	NA	14306	HG19/GRCh37		NA	NA	NA	NA	1	5653204	0
ebi-a-GCST90017063	Gut microbiota abundance (genus Ruminococcus2 id.11374)		public	2021	Kurilshikov A	NA	NA	33462485	European	NA	14306	HG19/GRCh37		NA	NA	NA	NA	1	5619774	0
ebi-a-GCST90017067	Gut microbiota abundance (genus Sellimonas id.14369)		public	2021	Kurilshikov A	NA	NA	33462485	European	NA	14306	HG19/GRCh37		NA	NA	NA	NA	1	4950440	0
ebi-a-GCST90017068	Gut microbiota abundance (genus Senegalimassilia id.11160)		public	2021	Kurilshikov A	NA	NA	33462485	European	NA	14306	HG19/GRCh37		NA	NA	NA	NA	1	5398286	0
ebi-a-GCST90017069	Gut microbiota abundance (genus Slackia id.825)		public	2021	Kurilshikov A	NA	NA	33462485	European	NA	14306	HG19/GRCh37		NA	NA	NA	NA	1	5369110	0
ebi-a-GCST90017070	Gut microbiota abundance (genus Streptococcus id.1853)		public	2021	Kurilshikov A	NA	NA	33462485	European	NA	14306	HG19/GRCh37		NA	NA	NA	NA	1	5643866	0
ebi-a-GCST90017071	Gut microbiota abundance (genus Subdoligranulum id.2070)		public	2021	Kurilshikov A	NA	NA	33462485	European	NA	14306	HG19/GRCh37		NA	NA	NA	NA	1	5708796	0
ebi-a-GCST90017072	Gut microbiota abundance (genus Sutterella id.2896)		public	2021	Kurilshikov A	NA	NA	33462485	European	NA	14306	HG19/GRCh37		NA	NA	NA	NA	1	5586151	0
ebi-a-GCST90017073	Gut microbiota abundance (genus Terrisporobacter id.11348)		public	2021	Kurilshikov A	NA	NA	33462485	European	NA	14306	HG19/GRCh37		NA	NA	NA	NA	1	5391104	0
ebi-a-GCST90017074	Gut microbiota abundance (genus Turicibacter id.2162)		public	2021	Kurilshikov A	NA	NA	33462485	European	NA	14306	HG19/GRCh37		NA	NA	NA	NA	1	5459137	0
ebi-a-GCST90017075	Gut microbiota abundance (genus Tyzzerella3 id.11335)		public	2021	Kurilshikov A	NA	NA	33462485	European	NA	14306	HG19/GRCh37		NA	NA	NA	NA	1	5326934	0
ebi-a-GCST90017088	Gut microbiota abundance (genus Veillonella id.2198)		public	2021	Kurilshikov A	NA	NA	33462485	European	NA	14306	HG19/GRCh37		NA	NA	NA	NA	1	5486191	0
ebi-a-GCST90017089	Gut microbiota abundance (genus Victivallis id.2256)		public	2021	Kurilshikov A	NA	NA	33462485	Mixed	NA	1531	HG19/GRCh37		NA	NA	NA	NA	1	4291501	0
ebi-a-GCST90017090	Gut microbiota abundance (order Actinomycetales id.420)		public	2021	Kurilshikov A	NA	NA	33462485	European	NA	14306	HG19/GRCh37		NA	NA	NA	NA	1	5424038	0
ebi-a-GCST90017091	Gut microbiota abundance (order Bacillales id.1674)		public	2021	Kurilshikov A	NA	NA	33462485	European	NA	14306	HG19/GRCh37		NA	NA	NA	NA	1	4738158	0
ebi-a-GCST90017092	Gut microbiota abundance (order Bacteroidales id.913)		public	2021	Kurilshikov A	NA	NA	33462485	European	NA	14306	HG19/GRCh37		NA	NA	NA	NA	1	5729267	0
ebi-a-GCST90017093	Gut microbiota abundance (order Bifidobacteriales id.432)		public	2021	Kurilshikov A	NA	NA	33462485	European	NA	14306	HG19/GRCh37		NA	NA	NA	NA	1	5668532	0
ebi-a-GCST90017094	Gut microbiota abundance (order Burkholderiales id.2874)		public	2021	Kurilshikov A	NA	NA	33462485	European	NA	14306	HG19/GRCh37		NA	NA	NA	NA	1	5707170	0
ebi-a-GCST90017095	Gut microbiota abundance (order Clostridiales id.1863)		public	2021	Kurilshikov A	NA	NA	33462485	European	NA	14306	HG19/GRCh37		NA	NA	NA	NA	1	5729268	0
ebi-a-GCST90017096	Gut microbiota abundance (order Coriobacteriales id.810)		public	2021	Kurilshikov A	NA	NA	33462485	European	NA	14306	HG19/GRCh37		NA	NA	NA	NA	1	5698092	0
ebi-a-GCST90017097	Gut microbiota abundance (order Desulfovibrionales id.3156)		public	2021	Kurilshikov A	NA	NA	33462485	European	NA	14306	HG19/GRCh37		NA	NA	NA	NA	1	5616504	0
ebi-a-GCST90017098	Gut microbiota abundance (order Enterobacteriales id.3468)		public	2021	Kurilshikov A	NA	NA	33462485	European	NA	14306	HG19/GRCh37		NA	NA	NA	NA	1	5598485	0
ebi-a-GCST90017099	Gut microbiota abundance (order Erysipelotrichales id.2148)		public	2021	Kurilshikov A	NA	NA	33462485	European	NA	14306	HG19/GRCh37		NA	NA	NA	NA	1	5720820	0
ebi-a-GCST90017100	Gut microbiota abundance (order Gastranaerophilales id.1591)		public	2021	Kurilshikov A	NA	NA	33462485	European	NA	14306	HG19/GRCh37		NA	NA	NA	NA	1	5355169	0
ebi-a-GCST90017101	Gut microbiota abundance (order Lactobacillales id.1800)		public	2021	Kurilshikov A	NA	NA	33462485	European	NA	14306	HG19/GRCh37		NA	NA	NA	NA	1	5662756	0
ebi-a-GCST90017102	Gut microbiota abundance (order Methanobacteriales id.120)		public	2021	Kurilshikov A	NA	NA	33462485	European	NA	14306	HG19/GRCh37		NA	NA	NA	NA	1	5118613	0
ebi-a-GCST90017103	Gut microbiota abundance (order Mollicutes RF9 id.11579)		public	2021	Kurilshikov A	NA	NA	33462485	European	NA	14306	HG19/GRCh37		NA	NA	NA	NA	1	5488779	0
ebi-a-GCST90017104	Gut microbiota abundance (order NB1n id.3953)		public	2021	Kurilshikov A	NA	NA	33462485	European	NA	14306	HG19/GRCh37		NA	NA	NA	NA	1	5316331	0
ebi-a-GCST90017105	Gut microbiota abundance (order Pasteurellales id.3688)		public	2021	Kurilshikov A	NA	NA	33462485	European	NA	14306	HG19/GRCh37		NA	NA	NA	NA	1	5491834	0
ebi-a-GCST90017106	Gut microbiota abundance (order Rhodospirillales id.2667)		public	2021	Kurilshikov A	NA	NA	33462485	European	NA	14306	HG19/GRCh37		NA	NA	NA	NA	1	5447392	0
ebi-a-GCST90017107	Gut microbiota abundance (order Selenomonadales id.2165)		public	2021	Kurilshikov A	NA	NA	33462485	European	NA	14306	HG19/GRCh37		NA	NA	NA	NA	1	5721008	0
ebi-a-GCST90017108	Gut microbiota abundance (order Verrucomicrobiales id.4030)		public	2021	Kurilshikov A	NA	NA	33462485	European	NA	14306	HG19/GRCh37		NA	NA	NA	NA	1	5518011	0
ebi-a-GCST90017109	Gut microbiota abundance (order Victivallales id.2254)		public	2021	Kurilshikov A	NA	NA	33462485	European	NA	14306	HG19/GRCh37		NA	NA	NA	NA	1	5282234	0
ebi-a-GCST90017110	Gut microbiota abundance (phylum Actinobacteria id.400)		public	2021	Kurilshikov A	NA	NA	33462485	European	NA	14306	HG19/GRCh37		NA	NA	NA	NA	1	5706452	0
ebi-a-GCST90017111	Gut microbiota abundance (phylum Bacteroidetes id.905)		public	2021	Kurilshikov A	NA	NA	33462485	European	NA	14306	HG19/GRCh37		NA	NA	NA	NA	1	5729267	0
ebi-a-GCST90017112	Gut microbiota abundance (phylum Cyanobacteria id.1500)		public	2021	Kurilshikov A	NA	NA	33462485	European	NA	14306	HG19/GRCh37		NA	NA	NA	NA	1	5403633	0
ebi-a-GCST90017113	Gut microbiota abundance (phylum Euryarchaeota id.55)		public	2021	Kurilshikov A	NA	NA	33462485	European	NA	14306	HG19/GRCh37		NA	NA	NA	NA	1	5165248	0
ebi-a-GCST90017114	Gut microbiota abundance (phylum Firmicutes id.1672)		public	2021	Kurilshikov A	NA	NA	33462485	European	NA	14306	HG19/GRCh37		NA	NA	NA	NA	1	5729268	0
ebi-a-GCST90017115	Gut microbiota abundance (phylum Lentisphaerae id.2238)		public	2021	Kurilshikov A	NA	NA	33462485	European	NA	14306	HG19/GRCh37		NA	NA	NA	NA	1	5282630	0
ebi-a-GCST90017116	Gut microbiota abundance (phylum Proteobacteria id.2375)		public	2021	Kurilshikov A	NA	NA	33462485	European	NA	14306	HG19/GRCh37		NA	NA	NA	NA	1	5728442	0
ebi-a-GCST90017117	Gut microbiota abundance (phylum Tenericutes id.3919)		public	2021	Kurilshikov A	NA	NA	33462485	European	NA	14306	HG19/GRCh37		NA	NA	NA	NA	1	5510407	0
ebi-a-GCST90017118	Gut microbiota abundance (phylum Verrucomicrobia id.3982)		public	2021	Kurilshikov A	NA	NA	33462485	European	NA	14306	HG19/GRCh37		NA	NA	NA	NA	1	5530329	0

## Sheet: Table S2
Table S2: Detailed information of SNPs.
	chr.exposure	pos.exposure	beta.exposure	se.exposure	pval.exposure	samplesize.exposure	id.exposure	SNP	effect_allele.exposure	other_allele.exposure	eaf.exposure	exposure	mr_keep.exposure	pval_origin.exposure	data_source.exposure
class	1	207003553	-0.0711483	0.0134495	1.10652e-07	14306	ebi-a-GCST90016908	rs6660520	G	A		|| id:ebi-a-GCST90016908	TRUE	reported	igd
class	1	114665485	0.0510452	0.0114325	8.62621e-06	14306	ebi-a-GCST90016908	rs12049045	A	G		|| id:ebi-a-GCST90016908	TRUE	reported	igd
class	2	136616754	-0.111489	0.012066	3.78966e-20	14306	ebi-a-GCST90016908	rs182549	T	C		|| id:ebi-a-GCST90016908	TRUE	reported	igd
class	2	161611969	0.0509242	0.0112503	6.71382e-06	14306	ebi-a-GCST90016908	rs1376754	G	A		|| id:ebi-a-GCST90016908	TRUE	reported	igd
class	5	475408	0.0563759	0.0115529	1.58132e-06	14306	ebi-a-GCST90016908	rs11745923	G	T		|| id:ebi-a-GCST90016908	TRUE	reported	igd
class	5	18019549	-0.0769653	0.0173933	8.62144e-06	14306	ebi-a-GCST90016908	rs7700479	T	A		|| id:ebi-a-GCST90016908	TRUE	reported	igd
class	6	14617591	0.0509553	0.011539	8.92237e-06	14306	ebi-a-GCST90016908	rs857444	C	T		|| id:ebi-a-GCST90016908	TRUE	reported	igd
class	7	95654718	0.0501255	0.011255	8.67601e-06	14306	ebi-a-GCST90016908	rs961091	G	A		|| id:ebi-a-GCST90016908	TRUE	reported	igd
class	8	65654844	0.155784	0.0348017	8.62105e-06	14306	ebi-a-GCST90016908	rs80083040	T	G		|| id:ebi-a-GCST90016908	TRUE	reported	igd
class	10	126110032	-0.0762317	0.0169884	4.96364e-06	14306	ebi-a-GCST90016908	rs1515761	C	T		|| id:ebi-a-GCST90016908	TRUE	reported	igd
class	11	71221248	-0.0540741	0.0121393	5.39237e-06	14306	ebi-a-GCST90016908	rs4945008	G	A		|| id:ebi-a-GCST90016908	TRUE	reported	igd
class	12	20378911	-0.0583765	0.0123353	2.59358e-06	14306	ebi-a-GCST90016908	rs10841473	G	C		|| id:ebi-a-GCST90016908	TRUE	reported	igd
class	13	112859829	0.0944467	0.0192976	6.20798e-07	14306	ebi-a-GCST90016908	rs7322849	T	C		|| id:ebi-a-GCST90016908	TRUE	reported	igd
class	15	49208992	-0.0719923	0.0154661	4.02819e-06	14306	ebi-a-GCST90016908	rs12899991	T	A		|| id:ebi-a-GCST90016908	TRUE	reported	igd
class	15	94852795	-0.126352	0.0273626	2.56803e-06	14306	ebi-a-GCST90016908	rs72767435	T	C		|| id:ebi-a-GCST90016908	TRUE	reported	igd
class	16	81776768	-0.0575816	0.0116762	8.3372e-07	14306	ebi-a-GCST90016908	rs8047955	G	A		|| id:ebi-a-GCST90016908	TRUE	reported	igd
class	17	75348675	-0.0560674	0.0124286	5.92516e-06	14306	ebi-a-GCST90016908	rs11655079	T	C		|| id:ebi-a-GCST90016908	TRUE	reported	igd
class	22	35567355	-0.111877	0.023501	1.50428e-06	14306	ebi-a-GCST90016908	rs134366	A	G		|| id:ebi-a-GCST90016908	TRUE	reported	igd
class	1	14238305	-0.0692742	0.0148866	3.55435e-06	14306	ebi-a-GCST90016909	rs10803434	A	T		|| id:ebi-a-GCST90016909	TRUE	reported	igd
class	2	169033340	0.133271	0.0267738	5.09143e-07	14306	ebi-a-GCST90016909	rs76784716	A	G		|| id:ebi-a-GCST90016909	TRUE	reported	igd
class	2	75630344	-0.0705145	0.0157564	7.37921e-06	14306	ebi-a-GCST90016909	rs34569731	G	A		|| id:ebi-a-GCST90016909	TRUE	reported	igd
class	3	59982336	0.0927341	0.0207569	9.33254e-06	14306	ebi-a-GCST90016909	rs17061716	G	C		|| id:ebi-a-GCST90016909	TRUE	reported	igd
class	3	84471266	-0.080811	0.0184159	7.53633e-06	14306	ebi-a-GCST90016909	rs55876211	C	T		|| id:ebi-a-GCST90016909	TRUE	reported	igd
class	3	176407911	0.0805256	0.0180912	9.75933e-06	14306	ebi-a-GCST90016909	rs62285697	C	T		|| id:ebi-a-GCST90016909	TRUE	reported	igd
class	3	13726736	-0.0751277	0.0153867	1.05334e-06	14306	ebi-a-GCST90016909	rs9813022	A	G		|| id:ebi-a-GCST90016909	TRUE	reported	igd
class	9	95517807	-0.160677	0.0317708	6.20369e-07	14306	ebi-a-GCST90016909	rs140912403	C	T		|| id:ebi-a-GCST90016909	TRUE	reported	igd
class	12	89471235	-0.0969489	0.0215149	8.84301e-06	14306	ebi-a-GCST90016909	rs7960664	A	G		|| id:ebi-a-GCST90016909	TRUE	reported	igd
class	19	28641647	0.0690234	0.0153829	7.14184e-06	14306	ebi-a-GCST90016909	rs12977163	G	C		|| id:ebi-a-GCST90016909	TRUE	reported	igd
class	1	200418805	-0.0714773	0.0146647	9.21977e-07	14306	ebi-a-GCST90016910	rs57872228	C	T		|| id:ebi-a-GCST90016910	TRUE	reported	igd
class	2	231723657	0.0476864	0.0108547	7.97389e-06	14306	ebi-a-GCST90016910	rs1595463	C	A		|| id:ebi-a-GCST90016910	TRUE	reported	igd
class	3	4800550	-0.0554219	0.0114789	1.38433e-06	14306	ebi-a-GCST90016910	rs1962325	G	C		|| id:ebi-a-GCST90016910	TRUE	reported	igd
class	3	94153993	0.156331	0.0325945	1.07251e-06	14306	ebi-a-GCST90016910	rs76717940	T	A		|| id:ebi-a-GCST90016910	TRUE	reported	igd
class	3	184371224	0.0979154	0.0224074	8.45688e-06	14306	ebi-a-GCST90016910	rs74663707	C	T		|| id:ebi-a-GCST90016910	TRUE	reported	igd
class	3	64398863	0.0601035	0.0136407	9.53038e-06	14306	ebi-a-GCST90016910	rs13068444	A	G		|| id:ebi-a-GCST90016910	TRUE	reported	igd
class	4	98049499	-0.0630747	0.0128717	1.96024e-06	14306	ebi-a-GCST90016910	rs11730038	G	A		|| id:ebi-a-GCST90016910	TRUE	reported	igd
class	4	7431487	0.0535854	0.0116362	4.29833e-06	14306	ebi-a-GCST90016910	rs4459992	T	C		|| id:ebi-a-GCST90016910	TRUE	reported	igd
class	4	184681021	0.128032	0.0286921	9.12809e-06	14306	ebi-a-GCST90016910	rs111552159	C	G		|| id:ebi-a-GCST90016910	TRUE	reported	igd
class	4	151687420	0.104044	0.0247934	8.46837e-06	14306	ebi-a-GCST90016910	rs7666190	A	C		|| id:ebi-a-GCST90016910	TRUE	reported	igd
class	5	174173171	-0.107255	0.0222879	1.33773e-06	14306	ebi-a-GCST90016910	rs77558518	A	G		|| id:ebi-a-GCST90016910	TRUE	reported	igd
class	6	67570929	-0.104496	0.0217083	1.52753e-06	14306	ebi-a-GCST90016910	rs74352383	T	A		|| id:ebi-a-GCST90016910	TRUE	reported	igd
class	7	36349586	0.108007	0.0232858	1.06891e-06	14306	ebi-a-GCST90016910	rs78938557	T	C		|| id:ebi-a-GCST90016910	TRUE	reported	igd
class	8	10143164	0.0598868	0.0123903	1.07895e-06	14306	ebi-a-GCST90016910	rs2952251	G	A		|| id:ebi-a-GCST90016910	TRUE	reported	igd
class	9	101101172	-0.0613034	0.0137579	7.81196e-06	14306	ebi-a-GCST90016910	rs28564647	T	G		|| id:ebi-a-GCST90016910	TRUE	reported	igd
class	11	8332350	0.0572158	0.0126793	7.21174e-06	14306	ebi-a-GCST90016910	rs12797734	T	C		|| id:ebi-a-GCST90016910	TRUE	reported	igd
class	12	100585559	-0.101189	0.0217379	4.85445e-06	14306	ebi-a-GCST90016910	rs11110282	A	G		|| id:ebi-a-GCST90016910	TRUE	reported	igd
class	13	24973509	-0.225309	0.0467697	1.79457e-06	14306	ebi-a-GCST90016910	rs9581006	T	C		|| id:ebi-a-GCST90016910	TRUE	reported	igd
class	15	58738075	-0.081146	0.0180042	7.59591e-06	14306	ebi-a-GCST90016910	rs694949	A	G		|| id:ebi-a-GCST90016910	TRUE	reported	igd
class	16	991253	0.0619529	0.0127066	1.01499e-06	14306	ebi-a-GCST90016910	rs35344081	G	A		|| id:ebi-a-GCST90016910	TRUE	reported	igd
class	17	40835649	-0.0520614	0.0109842	2.2076e-06	14306	ebi-a-GCST90016910	rs4028634	C	T		|| id:ebi-a-GCST90016910	TRUE	reported	igd
class	19	51959855	0.111056	0.0246039	6.54591e-06	14306	ebi-a-GCST90016910	rs34989881	A	G		|| id:ebi-a-GCST90016910	TRUE	reported	igd
class	1	176792690	0.0567113	0.0118386	1.54814e-06	14306	ebi-a-GCST90016911	rs7546249	A	T		|| id:ebi-a-GCST90016911	TRUE	reported	igd
class	1	200112563	0.222741	0.0508055	9.93482e-06	14306	ebi-a-GCST90016911	rs2363574	T	C		|| id:ebi-a-GCST90016911	TRUE	reported	igd
class	1	157495438	-0.22241	0.0493458	7.65526e-06	14306	ebi-a-GCST90016911	rs72706335	T	C		|| id:ebi-a-GCST90016911	TRUE	reported	igd
class	2	53831026	0.0508393	0.0106807	1.91509e-06	14306	ebi-a-GCST90016911	rs2032750	C	T		|| id:ebi-a-GCST90016911	TRUE	reported	igd
class	2	213189994	0.107377	0.0245661	8.76436e-06	14306	ebi-a-GCST90016911	rs4146051	G	A		|| id:ebi-a-GCST90016911	TRUE	reported	igd
class	3	195936789	0.0466729	0.0105312	8.4711e-06	14306	ebi-a-GCST90016911	rs4916508	A	G		|| id:ebi-a-GCST90016911	TRUE	reported	igd
class	3	89339527	-0.0645771	0.0132957	8.36778e-07	14306	ebi-a-GCST90016911	rs7631304	G	A		|| id:ebi-a-GCST90016911	TRUE	reported	igd
class	8	13110185	0.0646823	0.0149628	9.98596e-06	14306	ebi-a-GCST90016911	rs79585701	A	C		|| id:ebi-a-GCST90016911	TRUE	reported	igd
class	8	70916181	0.0655728	0.0149891	9.08657e-06	14306	ebi-a-GCST90016911	rs62531359	T	G		|| id:ebi-a-GCST90016911	TRUE	reported	igd
class	9	116888284	0.0689676	0.0148765	3.74576e-06	14306	ebi-a-GCST90016911	rs13291169	C	G		|| id:ebi-a-GCST90016911	TRUE	reported	igd
class	9	136493820	0.140055	0.0311128	7.06122e-06	14306	ebi-a-GCST90016911	rs62575403	C	T		|| id:ebi-a-GCST90016911	TRUE	reported	igd
class	10	39062269	0.0473596	0.010541	7.08223e-06	14306	ebi-a-GCST90016911	rs11146701	A	G		|| id:ebi-a-GCST90016911	TRUE	reported	igd
class	13	70523029	-0.121514	0.0236759	3.89583e-07	14306	ebi-a-GCST90016911	rs55773148	G	A		|| id:ebi-a-GCST90016911	TRUE	reported	igd
class	14	59317502	0.102648	0.0213843	9.23996e-07	14306	ebi-a-GCST90016911	rs111845179	T	C		|| id:ebi-a-GCST90016911	TRUE	reported	igd
class	16	74290641	0.0548532	0.012153	4.7338e-06	14306	ebi-a-GCST90016911	rs929878	T	C		|| id:ebi-a-GCST90016911	TRUE	reported	igd
class	17	6461200	-0.207018	0.0442633	1.21616e-06	14306	ebi-a-GCST90016911	rs73975615	G	A		|| id:ebi-a-GCST90016911	TRUE	reported	igd
class	22	27433885	-0.0552057	0.0120278	8.3593e-06	14306	ebi-a-GCST90016911	rs17343978	A	C		|| id:ebi-a-GCST90016911	TRUE	reported	igd
class	1	153240013	-0.0525581	0.0110408	2.0153e-06	14306	ebi-a-GCST90016912	rs1928341	G	A		|| id:ebi-a-GCST90016912	TRUE	reported	igd
class	2	239888758	0.0641363	0.0131766	1.09863e-06	14306	ebi-a-GCST90016912	rs12467854	G	C		|| id:ebi-a-GCST90016912	TRUE	reported	igd
class	3	193456274	0.064006	0.0130374	9.11759e-07	14306	ebi-a-GCST90016912	rs2367850	G	C		|| id:ebi-a-GCST90016912	TRUE	reported	igd
class	3	70592215	0.0592944	0.0128769	3.67147e-06	14306	ebi-a-GCST90016912	rs11128180	A	G		|| id:ebi-a-GCST90016912	TRUE	reported	igd
class	4	23588462	0.0923492	0.0199158	4.75762e-06	14306	ebi-a-GCST90016912	rs1511453	A	G		|| id:ebi-a-GCST90016912	TRUE	reported	igd
class	4	45642485	-0.0832423	0.0167237	5.17166e-07	14306	ebi-a-GCST90016912	rs4033856	T	C		|| id:ebi-a-GCST90016912	TRUE	reported	igd
class	5	173497796	0.109741	0.0236	2.9409e-06	14306	ebi-a-GCST90016912	rs62395635	T	C		|| id:ebi-a-GCST90016912	TRUE	reported	igd
class	7	111285025	0.0513106	0.0109091	2.19816e-06	14306	ebi-a-GCST90016912	rs2613606	T	C		|| id:ebi-a-GCST90016912	TRUE	reported	igd
class	8	112732674	-0.0622252	0.0135688	5.86949e-06	14306	ebi-a-GCST90016912	rs56386628	C	T		|| id:ebi-a-GCST90016912	TRUE	reported	igd
class	9	84206018	-0.137281	0.0290338	2.05509e-06	14306	ebi-a-GCST90016912	rs72747231	C	G		|| id:ebi-a-GCST90016912	TRUE	reported	igd
class	9	104899117	-0.0572286	0.01262	7.33247e-06	14306	ebi-a-GCST90016912	rs320161	G	A		|| id:ebi-a-GCST90016912	TRUE	reported	igd
class	13	58689340	-0.0494596	0.0109424	5.80029e-06	14306	ebi-a-GCST90016912	rs2321387	G	A		|| id:ebi-a-GCST90016912	TRUE	reported	igd
class	15	56786407	-0.121083	0.028075	9.27278e-06	14306	ebi-a-GCST90016912	rs75242906	C	T		|| id:ebi-a-GCST90016912	TRUE	reported	igd
class	18	26569901	0.052911	0.0114866	4.84585e-06	14306	ebi-a-GCST90016912	rs9964679	A	G		|| id:ebi-a-GCST90016912	TRUE	reported	igd
class	20	30596130	-0.0978177	0.0198522	7.44303e-07	14306	ebi-a-GCST90016912	rs6087811	T	G		|| id:ebi-a-GCST90016912	TRUE	reported	igd
class	2	116724915	0.0888472	0.0179655	9.54201e-06	14306	ebi-a-GCST90016913	rs13421739	C	G		|| id:ebi-a-GCST90016913	TRUE	reported	igd
class	2	231676041	0.0794173	0.0182427	9.8935e-06	14306	ebi-a-GCST90016913	rs10209007	G	C		|| id:ebi-a-GCST90016913	TRUE	reported	igd
class	3	131371980	0.0698882	0.0156319	8.39808e-06	14306	ebi-a-GCST90016913	rs76767978	G	A		|| id:ebi-a-GCST90016913	TRUE	reported	igd
class	3	89268714	-0.0592279	0.0134556	9.35643e-06	14306	ebi-a-GCST90016913	rs6797343	T	G		|| id:ebi-a-GCST90016913	TRUE	reported	igd
class	4	7420184	0.0529097	0.011818	8.77789e-06	14306	ebi-a-GCST90016913	rs13105690	C	T		|| id:ebi-a-GCST90016913	TRUE	reported	igd
class	4	161507301	-0.0739995	0.0150815	9.65095e-07	14306	ebi-a-GCST90016913	rs6814436	C	T		|| id:ebi-a-GCST90016913	TRUE	reported	igd
class	4	152131744	-0.103803	0.0210883	4.01856e-07	14306	ebi-a-GCST90016913	rs6815608	C	T		|| id:ebi-a-GCST90016913	TRUE	reported	igd
class	5	105060362	-0.0547202	0.0127338	8.72027e-06	14306	ebi-a-GCST90016913	rs1842454	G	A		|| id:ebi-a-GCST90016913	TRUE	reported	igd
class	5	149077788	-0.0511937	0.0109569	3.37085e-06	14306	ebi-a-GCST90016913	rs13179700	C	T		|| id:ebi-a-GCST90016913	TRUE	reported	igd
class	5	35770550	0.0866169	0.0190393	8.24233e-06	14306	ebi-a-GCST90016913	rs72738886	T	C		|| id:ebi-a-GCST90016913	TRUE	reported	igd
class	6	12397187	0.0947036	0.0225117	7.53165e-06	14306	ebi-a-GCST90016913	rs76860606	C	G		|| id:ebi-a-GCST90016913	TRUE	reported	igd
class	6	163743050	0.0524406	0.0116115	6.53085e-06	14306	ebi-a-GCST90016913	rs6934062	G	C		|| id:ebi-a-GCST90016913	TRUE	reported	igd
class	12	5942519	-0.052659	0.0113858	3.24399e-06	14306	ebi-a-GCST90016913	rs10774377	G	A		|| id:ebi-a-GCST90016913	TRUE	reported	igd
class	14	52494072	-0.0724037	0.0153105	4.52137e-06	14306	ebi-a-GCST90016913	rs2273429	A	G		|| id:ebi-a-GCST90016913	TRUE	reported	igd
class	18	48792829	-0.0581025	0.0120557	1.34295e-06	14306	ebi-a-GCST90016913	rs72915163	T	C		|| id:ebi-a-GCST90016913	TRUE	reported	igd
class	20	50803760	-0.0963981	0.0212007	9.04045e-06	14306	ebi-a-GCST90016913	rs7269302	A	T		|| id:ebi-a-GCST90016913	TRUE	reported	igd
class	21	18567802	-0.255639	0.0508787	8.77506e-07	14306	ebi-a-GCST90016913	rs992074	T	C		|| id:ebi-a-GCST90016913	TRUE	reported	igd
class	21	40703251	0.0641008	0.0127404	3.81408e-07	14306	ebi-a-GCST90016913	rs112334273	G	A		|| id:ebi-a-GCST90016913	TRUE	reported	igd
class	1	176571431	-0.0603429	0.0126849	1.51604e-06	14306	ebi-a-GCST90016914	rs240104	T	C		|| id:ebi-a-GCST90016914	TRUE	reported	igd
class	3	11654412	0.116408	0.0258545	9.02693e-06	14306	ebi-a-GCST90016914	rs2442778	A	G		|| id:ebi-a-GCST90016914	TRUE	reported	igd
class	5	125460084	0.0774888	0.0171877	5.63093e-06	14306	ebi-a-GCST90016914	rs76779974	C	G		|| id:ebi-a-GCST90016914	TRUE	reported	igd
class	5	459415	0.25584	0.0561995	4.65693e-06	14306	ebi-a-GCST90016914	rs80046645	C	G		|| id:ebi-a-GCST90016914	TRUE	reported	igd
class	5	90471451	0.0498855	0.0112446	9.77372e-06	14306	ebi-a-GCST90016914	rs1397793	A	G		|| id:ebi-a-GCST90016914	TRUE	reported	igd
class	7	24464799	-0.0486059	0.0108982	7.87281e-06	14306	ebi-a-GCST90016914	rs62448869	T	A		|| id:ebi-a-GCST90016914	TRUE	reported	igd
class	7	105084680	-0.0565686	0.0126265	7.79938e-06	14306	ebi-a-GCST90016914	rs13307134	T	C		|| id:ebi-a-GCST90016914	TRUE	reported	igd
class	9	136512906	0.0926543	0.0209468	8.26913e-06	14306	ebi-a-GCST90016914	rs3025411	A	G		|| id:ebi-a-GCST90016914	TRUE	reported	igd
class	10	1922731	0.06075	0.0130939	4.82848e-06	14306	ebi-a-GCST90016914	rs11250875	T	C		|| id:ebi-a-GCST90016914	TRUE	reported	igd
class	10	65799217	0.0778402	0.0155815	5.43313e-07	14306	ebi-a-GCST90016914	rs719099	A	G		|| id:ebi-a-GCST90016914	TRUE	reported	igd
class	12	11494021	0.0586265	0.0129006	4.84117e-06	14306	ebi-a-GCST90016914	rs1816223	G	A		|| id:ebi-a-GCST90016914	TRUE	reported	igd
class	14	39660509	0.103377	0.0229286	6.8962e-06	14306	ebi-a-GCST90016914	rs8010111	A	G		|| id:ebi-a-GCST90016914	TRUE	reported	igd
class	15	86433579	-0.0510212	0.0114339	8.14442e-06	14306	ebi-a-GCST90016914	rs11073596	G	T		|| id:ebi-a-GCST90016914	TRUE	reported	igd
class	17	37376685	0.0965017	0.0207666	3.88356e-06	14306	ebi-a-GCST90016914	rs34739816	G	T		|| id:ebi-a-GCST90016914	TRUE	reported	igd
class	17	8121332	0.0773006	0.017553	8.0201e-06	14306	ebi-a-GCST90016914	rs11656361	A	C		|| id:ebi-a-GCST90016914	TRUE	reported	igd
class	19	52895166	0.0789796	0.0177205	8.51236e-06	14306	ebi-a-GCST90016914	rs12974142	G	A		|| id:ebi-a-GCST90016914	TRUE	reported	igd
class	20	62072077	-0.0714367	0.0154113	5.39126e-06	14306	ebi-a-GCST90016914	rs67561917	A	G		|| id:ebi-a-GCST90016914	TRUE	reported	igd
class	1	203308383	-0.0705516	0.0150849	5.67884e-06	14306	ebi-a-GCST90016915	rs16851319	G	C		|| id:ebi-a-GCST90016915	TRUE	reported	igd
class	1	203991605	-0.110335	0.0253336	3.14188e-06	14306	ebi-a-GCST90016915	rs2692012	G	A		|| id:ebi-a-GCST90016915	TRUE	reported	igd
class	2	233929283	-0.0523484	0.011566	7.50119e-06	14306	ebi-a-GCST90016915	rs3935584	C	T		|| id:ebi-a-GCST90016915	TRUE	reported	igd
class	8	57867671	-0.0779693	0.0170738	7.31375e-06	14306	ebi-a-GCST90016915	rs55744759	A	G		|| id:ebi-a-GCST90016915	TRUE	reported	igd
class	9	15269705	0.206594	0.0456908	4.63052e-06	14306	ebi-a-GCST90016915	rs112381107	C	T		|| id:ebi-a-GCST90016915	TRUE	reported	igd
class	9	81834426	-0.0735881	0.0154246	1.60221e-06	14306	ebi-a-GCST90016915	rs17791387	A	G		|| id:ebi-a-GCST90016915	TRUE	reported	igd
class	10	11855599	0.0544219	0.0117397	3.94121e-06	14306	ebi-a-GCST90016915	rs11599763	C	T		|| id:ebi-a-GCST90016915	TRUE	reported	igd
class	11	10658735	0.055176	0.0121602	9.65162e-06	14306	ebi-a-GCST90016915	rs1035691	G	A		|| id:ebi-a-GCST90016915	TRUE	reported	igd
class	15	96161065	-0.0585411	0.0129358	4.85087e-06	14306	ebi-a-GCST90016915	rs62020470	A	G		|| id:ebi-a-GCST90016915	TRUE	reported	igd
class	16	71541641	-0.0538457	0.0117718	5.02077e-06	14306	ebi-a-GCST90016915	rs9928243	C	A		|| id:ebi-a-GCST90016915	TRUE	reported	igd
class	17	2856662	-0.0936514	0.02012	3.58889e-06	14306	ebi-a-GCST90016915	rs4506934	C	T		|| id:ebi-a-GCST90016915	TRUE	reported	igd
class	18	69312914	-0.0710762	0.015953	5.6863e-06	14306	ebi-a-GCST90016915	rs17084793	G	A		|| id:ebi-a-GCST90016915	TRUE	reported	igd
class	20	33694801	0.0825716	0.0165958	3.39555e-07	14306	ebi-a-GCST90016915	rs6058181	C	T		|| id:ebi-a-GCST90016915	TRUE	reported	igd
class	21	45064961	0.0561722	0.0124124	5.44553e-06	14306	ebi-a-GCST90016915	rs2838334	G	A		|| id:ebi-a-GCST90016915	TRUE	reported	igd
class	1	64139196	-0.0475363	0.0106939	9.52708e-06	14306	ebi-a-GCST90016916	rs1884466	C	T		|| id:ebi-a-GCST90016916	TRUE	reported	igd
class	1	97457427	-0.0497374	0.0111376	8.02897e-06	14306	ebi-a-GCST90016916	rs290833	T	G		|| id:ebi-a-GCST90016916	TRUE	reported	igd
class	3	195793712	-0.0524152	0.0106784	8.95468e-07	14306	ebi-a-GCST90016916	rs2300774	A	G		|| id:ebi-a-GCST90016916	TRUE	reported	igd
class	5	3002546	-0.0492438	0.010887	6.14582e-06	14306	ebi-a-GCST90016916	rs1074800	G	A		|| id:ebi-a-GCST90016916	TRUE	reported	igd
class	8	38803551	0.0681159	0.0127883	1.12264e-07	14306	ebi-a-GCST90016916	rs62504403	C	T		|| id:ebi-a-GCST90016916	TRUE	reported	igd
class	8	2954952	0.0839071	0.0199131	9.28453e-06	14306	ebi-a-GCST90016916	rs7826267	G	T		|| id:ebi-a-GCST90016916	TRUE	reported	igd
class	10	133897233	-0.0552212	0.0116074	2.33115e-06	14306	ebi-a-GCST90016916	rs10781552	C	T		|| id:ebi-a-GCST90016916	TRUE	reported	igd
class	13	40385457	0.10305	0.0224648	2.79126e-06	14306	ebi-a-GCST90016916	rs17530232	A	G		|| id:ebi-a-GCST90016916	TRUE	reported	igd
class	14	48997206	0.0608929	0.0133764	4.23107e-06	14306	ebi-a-GCST90016916	rs4078432	T	C		|| id:ebi-a-GCST90016916	TRUE	reported	igd
class	14	56156504	0.0538798	0.0116888	4.08479e-06	14306	ebi-a-GCST90016916	rs8003149	C	T		|| id:ebi-a-GCST90016916	TRUE	reported	igd
class	14	80357610	0.0724145	0.0164471	5.40344e-06	14306	ebi-a-GCST90016916	rs56970041	T	G		|| id:ebi-a-GCST90016916	TRUE	reported	igd
class	17	70327224	-0.0806041	0.0167641	1.8451e-06	14306	ebi-a-GCST90016916	rs35161940	T	C		|| id:ebi-a-GCST90016916	TRUE	reported	igd
class	18	5830507	-0.0945759	0.0194091	9.12347e-07	14306	ebi-a-GCST90016916	rs7234058	T	C		|| id:ebi-a-GCST90016916	TRUE	reported	igd
class	1	186502694	-0.0788843	0.0172415	8.89488e-06	14306	ebi-a-GCST90016917	rs12404135	A	G		|| id:ebi-a-GCST90016917	TRUE	reported	igd
class	2	167986992	0.074251	0.0146392	1.99494e-07	14306	ebi-a-GCST90016917	rs6706173	A	C		|| id:ebi-a-GCST90016917	TRUE	reported	igd
class	3	18615903	0.0729012	0.0163003	8.7878e-06	14306	ebi-a-GCST90016917	rs75101789	C	T		|| id:ebi-a-GCST90016917	TRUE	reported	igd
class	6	137612554	-0.0549673	0.0120924	4.54611e-06	14306	ebi-a-GCST90016917	rs9494710	C	T		|| id:ebi-a-GCST90016917	TRUE	reported	igd
class	8	115123937	0.0541424	0.0116333	3.2898e-06	14306	ebi-a-GCST90016917	rs6469506	T	A		|| id:ebi-a-GCST90016917	TRUE	reported	igd
class	12	43572952	-0.0579153	0.0118796	9.94764e-07	14306	ebi-a-GCST90016917	rs11181912	G	A		|| id:ebi-a-GCST90016917	TRUE	reported	igd
class	18	75633634	-0.0740614	0.0162596	6.77002e-06	14306	ebi-a-GCST90016917	rs9973122	A	T		|| id:ebi-a-GCST90016917	TRUE	reported	igd
class	18	48185248	-0.15921	0.0351373	7.9241e-06	14306	ebi-a-GCST90016917	rs79795896	A	G		|| id:ebi-a-GCST90016917	TRUE	reported	igd
class	1	11943792	0.220207	0.0486196	5.18036e-06	14306	ebi-a-GCST90016918	rs72640280	A	G		|| id:ebi-a-GCST90016918	TRUE	reported	igd
class	3	6223568	-0.131217	0.0288713	8.66343e-06	14306	ebi-a-GCST90016918	rs73113483	T	A		|| id:ebi-a-GCST90016918	TRUE	reported	igd
class	5	94720245	-0.109438	0.023693	4.24356e-06	14306	ebi-a-GCST90016918	rs2731834	G	C		|| id:ebi-a-GCST90016918	TRUE	reported	igd
class	7	146795379	0.109431	0.0234879	1.9073e-06	14306	ebi-a-GCST90016918	rs11770843	C	T		|| id:ebi-a-GCST90016918	TRUE	reported	igd
class	9	111086170	-0.21635	0.0439866	1.07924e-06	14306	ebi-a-GCST90016918	rs62570196	C	T		|| id:ebi-a-GCST90016918	TRUE	reported	igd
class	13	20687179	0.122368	0.0270329	4.38258e-06	14306	ebi-a-GCST90016918	rs2031282	A	G		|| id:ebi-a-GCST90016918	TRUE	reported	igd
class	15	25162535	0.152377	0.0324332	4.05864e-06	14306	ebi-a-GCST90016918	rs17114848	G	A		|| id:ebi-a-GCST90016918	TRUE	reported	igd
class	15	101242690	-0.105025	0.0233484	8.14836e-06	14306	ebi-a-GCST90016918	rs1002941	A	G		|| id:ebi-a-GCST90016918	TRUE	reported	igd
class	20	61394262	0.230292	0.0480168	1.86132e-06	14306	ebi-a-GCST90016918	rs77599476	A	G		|| id:ebi-a-GCST90016918	TRUE	reported	igd
class	21	21023966	-0.13741	0.0289246	1.72211e-06	14306	ebi-a-GCST90016918	rs2825714	A	G		|| id:ebi-a-GCST90016918	TRUE	reported	igd
class	1	230523039	-0.0896103	0.0186432	1.27488e-06	14306	ebi-a-GCST90016919	rs16851659	G	C		|| id:ebi-a-GCST90016919	TRUE	reported	igd
class	3	14306949	-0.159735	0.0292553	5.36056e-08	14306	ebi-a-GCST90016919	rs9864379	T	C		|| id:ebi-a-GCST90016919	TRUE	reported	igd
class	7	20010624	0.166216	0.0355728	2.86609e-06	14306	ebi-a-GCST90016919	rs73074665	A	T		|| id:ebi-a-GCST90016919	TRUE	reported	igd
class	9	122046549	-0.123968	0.0278958	7.10739e-06	14306	ebi-a-GCST90016919	rs1221147	A	T		|| id:ebi-a-GCST90016919	TRUE	reported	igd
class	9	115975389	0.0896187	0.0185106	1.48057e-06	14306	ebi-a-GCST90016919	rs4129395	G	A		|| id:ebi-a-GCST90016919	TRUE	reported	igd
class	9	26184578	-0.0814624	0.0184409	9.95795e-06	14306	ebi-a-GCST90016919	rs10738747	A	G		|| id:ebi-a-GCST90016919	TRUE	reported	igd
class	9	24648997	-0.205352	0.0454982	8.05675e-06	14306	ebi-a-GCST90016919	rs113884518	T	C		|| id:ebi-a-GCST90016919	TRUE	reported	igd
class	11	2937631	0.083758	0.0185796	8.19917e-06	14306	ebi-a-GCST90016919	rs367480	A	G		|| id:ebi-a-GCST90016919	TRUE	reported	igd
class	14	107061448	-0.0861928	0.0193381	8.67142e-06	14306	ebi-a-GCST90016919	rs10148250	A	G		|| id:ebi-a-GCST90016919	TRUE	reported	igd
class	15	100747683	0.226722	0.0487841	3.29011e-06	14306	ebi-a-GCST90016919	rs79790072	T	C		|| id:ebi-a-GCST90016919	TRUE	reported	igd
class	16	80493705	0.0989487	0.0196972	6.02893e-07	14306	ebi-a-GCST90016919	rs11150282	T	C		|| id:ebi-a-GCST90016919	TRUE	reported	igd
class	17	53906328	0.214848	0.0470878	6.69083e-06	14306	ebi-a-GCST90016919	rs28678345	T	C		|| id:ebi-a-GCST90016919	TRUE	reported	igd
class	18	1008278	-0.103539	0.0234287	6.84636e-06	14306	ebi-a-GCST90016919	rs789069	A	C		|| id:ebi-a-GCST90016919	TRUE	reported	igd
class	2	125440268	0.121754	0.0235357	3.01432e-07	14306	ebi-a-GCST90016920	rs10202904	G	T		|| id:ebi-a-GCST90016920	TRUE	reported	igd
class	3	15053083	-0.199566	0.0411825	1.63061e-06	14306	ebi-a-GCST90016920	rs6776814	T	C		|| id:ebi-a-GCST90016920	TRUE	reported	igd
class	3	2086167	0.164498	0.0364959	7.44338e-06	14306	ebi-a-GCST90016920	rs4257531	G	A		|| id:ebi-a-GCST90016920	TRUE	reported	igd
class	4	104418307	0.216999	0.0449076	1.87556e-06	14306	ebi-a-GCST90016920	rs894996	C	A		|| id:ebi-a-GCST90016920	TRUE	reported	igd
class	5	178160975	0.178661	0.039298	6.17988e-06	14306	ebi-a-GCST90016920	rs56131665	G	A		|| id:ebi-a-GCST90016920	TRUE	reported	igd
class	7	10773932	-0.15814	0.0351803	8.44578e-06	14306	ebi-a-GCST90016920	rs73068003	G	T		|| id:ebi-a-GCST90016920	TRUE	reported	igd
class	11	89349287	0.111465	0.0250516	6.51869e-06	14306	ebi-a-GCST90016920	rs11018665	A	T		|| id:ebi-a-GCST90016920	TRUE	reported	igd
class	12	43701132	-0.216781	0.0493496	6.07561e-06	14306	ebi-a-GCST90016920	rs12825290	C	G		|| id:ebi-a-GCST90016920	TRUE	reported	igd
class	12	21338861	-0.227245	0.048763	5.92107e-06	14306	ebi-a-GCST90016920	rs75208022	C	T		|| id:ebi-a-GCST90016920	TRUE	reported	igd
class	13	41956181	0.21534	0.0436695	1.40854e-06	14306	ebi-a-GCST90016920	rs73457410	A	G		|| id:ebi-a-GCST90016920	TRUE	reported	igd
class	19	28827760	-0.153519	0.0344519	8.22527e-06	14306	ebi-a-GCST90016920	rs6508769	C	T		|| id:ebi-a-GCST90016920	TRUE	reported	igd
class	19	46439321	0.111274	0.0247517	9.27897e-06	14306	ebi-a-GCST90016920	rs10424197	A	G		|| id:ebi-a-GCST90016920	TRUE	reported	igd
class	1	109965986	0.0681052	0.0149061	4.2335e-06	14306	ebi-a-GCST90016921	rs3768491	G	A		|| id:ebi-a-GCST90016921	TRUE	reported	igd
class	1	61850864	-0.101147	0.0230978	3.65098e-06	14306	ebi-a-GCST90016921	rs12566890	T	G		|| id:ebi-a-GCST90016921	TRUE	reported	igd
class	2	157532549	0.074438	0.0153389	9.56577e-07	14306	ebi-a-GCST90016921	rs11890098	A	G		|| id:ebi-a-GCST90016921	TRUE	reported	igd
class	7	79490250	0.0944239	0.0211806	8.39499e-06	14306	ebi-a-GCST90016921	rs2464826	A	C		|| id:ebi-a-GCST90016921	TRUE	reported	igd
class	8	59440824	0.0769142	0.0153953	1.09001e-06	14306	ebi-a-GCST90016921	rs10108398	G	A		|| id:ebi-a-GCST90016921	TRUE	reported	igd
class	11	47103877	-0.0841852	0.0178119	3.25792e-06	14306	ebi-a-GCST90016921	rs72901605	T	C		|| id:ebi-a-GCST90016921	TRUE	reported	igd
class	11	108439087	-0.108283	0.0237289	5.87611e-06	14306	ebi-a-GCST90016921	rs78169027	A	G		|| id:ebi-a-GCST90016921	TRUE	reported	igd
class	13	73170489	0.0819606	0.0181628	7.26993e-06	14306	ebi-a-GCST90016921	rs4885016	C	T		|| id:ebi-a-GCST90016921	TRUE	reported	igd
class	14	46519718	0.221639	0.0462918	1.5569e-06	14306	ebi-a-GCST90016921	rs74603314	T	C		|| id:ebi-a-GCST90016921	TRUE	reported	igd
class	14	97159674	0.06099	0.0135623	6.60861e-06	14306	ebi-a-GCST90016921	rs17214486	C	A		|| id:ebi-a-GCST90016921	TRUE	reported	igd
class	15	95309676	0.0820873	0.0188312	8.07402e-06	14306	ebi-a-GCST90016921	rs28537087	G	A		|| id:ebi-a-GCST90016921	TRUE	reported	igd
class	20	16259524	-0.114937	0.0248606	4.55481e-06	14306	ebi-a-GCST90016921	rs6043847	T	C		|| id:ebi-a-GCST90016921	TRUE	reported	igd
class	3	142135117	0.0625312	0.0131735	1.95488e-06	14306	ebi-a-GCST90016922	rs13086907	G	A		|| id:ebi-a-GCST90016922	TRUE	reported	igd
class	4	17413426	-0.151829	0.0314932	1.87452e-06	14306	ebi-a-GCST90016922	rs73232831	G	A		|| id:ebi-a-GCST90016922	TRUE	reported	igd
class	5	165266628	-0.0565284	0.0112298	4.14601e-07	14306	ebi-a-GCST90016922	rs1643968	T	C		|| id:ebi-a-GCST90016922	TRUE	reported	igd
class	7	22817571	0.0501306	0.0105798	2.00111e-06	14306	ebi-a-GCST90016922	rs4722181	T	G		|| id:ebi-a-GCST90016922	TRUE	reported	igd
class	7	75609677	0.0529785	0.0119177	9.26296e-06	14306	ebi-a-GCST90016922	rs1135612	G	A		|| id:ebi-a-GCST90016922	TRUE	reported	igd
class	8	41231597	0.0502053	0.0108382	2.93326e-06	14306	ebi-a-GCST90016922	rs1447205	C	G		|| id:ebi-a-GCST90016922	TRUE	reported	igd
class	9	124912908	0.0777075	0.0168628	2.95474e-06	14306	ebi-a-GCST90016922	rs61249479	A	C		|| id:ebi-a-GCST90016922	TRUE	reported	igd
class	10	115597993	0.0543966	0.0129365	7.80657e-06	14306	ebi-a-GCST90016922	rs4463806	C	T		|| id:ebi-a-GCST90016922	TRUE	reported	igd
class	10	80086072	0.0748989	0.0166458	7.58124e-06	14306	ebi-a-GCST90016922	rs1649999	A	G		|| id:ebi-a-GCST90016922	TRUE	reported	igd
class	10	5579818	0.047817	0.0105282	6.06108e-06	14306	ebi-a-GCST90016922	rs9423647	G	A		|| id:ebi-a-GCST90016922	TRUE	reported	igd
class	15	101245088	-0.114178	0.02405	2.16631e-06	14306	ebi-a-GCST90016922	rs71405394	G	A		|| id:ebi-a-GCST90016922	TRUE	reported	igd
class	16	21249925	-0.0659623	0.0134137	1.1623e-06	14306	ebi-a-GCST90016922	rs60274479	T	C		|| id:ebi-a-GCST90016922	TRUE	reported	igd
class	21	34377485	0.0489057	0.0108842	8.43918e-06	14306	ebi-a-GCST90016922	rs2834062	A	G		|| id:ebi-a-GCST90016922	TRUE	reported	igd
class	1	41074472	-0.0758309	0.0167762	6.7228e-06	14306	ebi-a-GCST90016923	rs61779207	G	A		|| id:ebi-a-GCST90016923	TRUE	reported	igd
class	1	105422565	-0.0655342	0.0142231	4.13409e-06	14306	ebi-a-GCST90016923	rs11184341	C	G		|| id:ebi-a-GCST90016923	TRUE	reported	igd
class	4	100544188	0.112164	0.0236422	1.63222e-06	14306	ebi-a-GCST90016923	rs74542928	T	C		|| id:ebi-a-GCST90016923	TRUE	reported	igd
class	4	95027272	0.0749798	0.0150177	6.73085e-07	14306	ebi-a-GCST90016923	rs11729256	T	C		|| id:ebi-a-GCST90016923	TRUE	reported	igd
class	6	56341481	-0.0704036	0.0147128	2.53688e-06	14306	ebi-a-GCST90016923	rs9349825	A	G		|| id:ebi-a-GCST90016923	TRUE	reported	igd
class	10	5064327	-0.0689292	0.0147693	2.63615e-06	14306	ebi-a-GCST90016923	rs4242783	A	G		|| id:ebi-a-GCST90016923	TRUE	reported	igd
class	11	130280667	-0.0648843	0.0135928	1.1222e-06	14306	ebi-a-GCST90016923	rs4936098	G	A		|| id:ebi-a-GCST90016923	TRUE	reported	igd
class	12	130309670	0.090699	0.0196746	3.73844e-06	14306	ebi-a-GCST90016923	rs111862613	T	C		|| id:ebi-a-GCST90016923	TRUE	reported	igd
class	15	97570657	0.0618926	0.0130946	2.17165e-06	14306	ebi-a-GCST90016923	rs12908520	G	A		|| id:ebi-a-GCST90016923	TRUE	reported	igd
class	16	81063149	-0.0746844	0.0156194	2.58297e-06	14306	ebi-a-GCST90016923	rs2602429	T	C		|| id:ebi-a-GCST90016923	TRUE	reported	igd
class	18	49473635	0.204683	0.0431572	2.91823e-06	14306	ebi-a-GCST90016923	rs117107102	A	G		|| id:ebi-a-GCST90016923	TRUE	reported	igd
class	20	31867840	-0.0631436	0.0143767	9.60993e-06	14306	ebi-a-GCST90016923	rs941682	G	A		|| id:ebi-a-GCST90016923	TRUE	reported	igd
family	1	203102563	0.0595857	0.01296	4.24326e-06	14306	ebi-a-GCST90016924	rs6427992	C	G		|| id:ebi-a-GCST90016924	TRUE	reported	igd
family	3	186553389	-0.108969	0.0243533	7.0881e-06	14306	ebi-a-GCST90016924	rs74540770	G	A		|| id:ebi-a-GCST90016924	TRUE	reported	igd
family	3	18462531	-0.143755	0.0323244	9.16474e-06	14306	ebi-a-GCST90016924	rs78702810	T	C		|| id:ebi-a-GCST90016924	TRUE	reported	igd
family	6	158647999	-0.065675	0.0142257	3.24908e-06	14306	ebi-a-GCST90016924	rs262812	T	C		|| id:ebi-a-GCST90016924	TRUE	reported	igd
family	6	5723181	-0.0796106	0.0169192	2.21304e-06	14306	ebi-a-GCST90016924	rs6923842	T	C		|| id:ebi-a-GCST90016924	TRUE	reported	igd
family	9	107117653	0.0662557	0.0140257	2.23676e-06	14306	ebi-a-GCST90016924	rs2933324	G	A		|| id:ebi-a-GCST90016924	TRUE	reported	igd
family	11	114701288	-0.165911	0.0349516	2.3151e-06	14306	ebi-a-GCST90016924	rs6589457	G	A		|| id:ebi-a-GCST90016924	TRUE	reported	igd
family	20	61991833	-0.117863	0.0257351	5.86422e-06	14306	ebi-a-GCST90016924	rs45497800	T	C		|| id:ebi-a-GCST90016924	TRUE	reported	igd
family	6	169224781	0.0747546	0.0164684	6.05327e-06	14306	ebi-a-GCST90016925	rs4073240	G	A		|| id:ebi-a-GCST90016925	TRUE	reported	igd
family	6	67207371	0.123756	0.026427	5.47974e-06	14306	ebi-a-GCST90016925	rs34583783	G	T		|| id:ebi-a-GCST90016925	TRUE	reported	igd
family	6	133007480	0.241826	0.0503796	1.82671e-06	14306	ebi-a-GCST90016925	rs35011108	A	G		|| id:ebi-a-GCST90016925	TRUE	reported	igd
family	9	76394568	-0.0887537	0.0195009	3.64418e-06	14306	ebi-a-GCST90016925	rs2889192	T	G		|| id:ebi-a-GCST90016925	TRUE	reported	igd
family	15	29850991	0.0761407	0.0169007	6.12421e-06	14306	ebi-a-GCST90016925	rs58484246	T	C		|| id:ebi-a-GCST90016925	TRUE	reported	igd
family	2	239900775	0.0684302	0.0133636	2.75943e-07	14306	ebi-a-GCST90016926	rs62191117	A	G		|| id:ebi-a-GCST90016926	TRUE	reported	igd
family	3	70588939	0.0603335	0.0127779	2.70477e-06	14306	ebi-a-GCST90016926	rs7638039	T	C		|| id:ebi-a-GCST90016926	TRUE	reported	igd
family	3	193456274	0.0629104	0.0131712	1.84629e-06	14306	ebi-a-GCST90016926	rs2367850	G	C		|| id:ebi-a-GCST90016926	TRUE	reported	igd
family	4	75867283	-0.0609257	0.0125363	1.1272e-06	14306	ebi-a-GCST90016926	rs17000015	A	T		|| id:ebi-a-GCST90016926	TRUE	reported	igd
family	4	45642485	-0.081834	0.0168931	1.02903e-06	14306	ebi-a-GCST90016926	rs4033856	T	C		|| id:ebi-a-GCST90016926	TRUE	reported	igd
family	5	173497796	0.110583	0.0238514	3.34696e-06	14306	ebi-a-GCST90016926	rs62395635	T	C		|| id:ebi-a-GCST90016926	TRUE	reported	igd
family	5	104233461	-0.058727	0.0128306	5.96788e-06	14306	ebi-a-GCST90016926	rs1153990	A	G		|| id:ebi-a-GCST90016926	TRUE	reported	igd
family	6	138305038	0.131484	0.0281089	3.56484e-06	14306	ebi-a-GCST90016926	rs112159068	A	T		|| id:ebi-a-GCST90016926	TRUE	reported	igd
family	7	104214487	-0.0593564	0.0129137	3.8858e-06	14306	ebi-a-GCST90016926	rs6969323	A	C		|| id:ebi-a-GCST90016926	TRUE	reported	igd
family	9	82485327	-0.0775052	0.0171554	5.27667e-06	14306	ebi-a-GCST90016926	rs112135816	T	G		|| id:ebi-a-GCST90016926	TRUE	reported	igd
family	11	20763367	-0.0944052	0.0213287	6.85046e-06	14306	ebi-a-GCST90016926	rs74776516	T	G		|| id:ebi-a-GCST90016926	TRUE	reported	igd
family	12	1396151	-0.106817	0.023298	3.33557e-06	14306	ebi-a-GCST90016926	rs7302582	G	C		|| id:ebi-a-GCST90016926	TRUE	reported	igd
family	13	58545246	-0.0570888	0.0110683	2.35109e-07	14306	ebi-a-GCST90016926	rs9537886	A	C		|| id:ebi-a-GCST90016926	TRUE	reported	igd
family	14	66593668	-0.0563972	0.0124753	6.08373e-06	14306	ebi-a-GCST90016926	rs2184675	A	T		|| id:ebi-a-GCST90016926	TRUE	reported	igd
family	15	71522509	0.0516967	0.0115503	6.60602e-06	14306	ebi-a-GCST90016926	rs28480294	C	T		|| id:ebi-a-GCST90016926	TRUE	reported	igd
family	16	85945839	0.0489475	0.0110321	9.12704e-06	14306	ebi-a-GCST90016926	rs147968	C	T		|| id:ebi-a-GCST90016926	TRUE	reported	igd
family	18	26569901	0.0537051	0.0116008	4.47384e-06	14306	ebi-a-GCST90016926	rs9964679	A	G		|| id:ebi-a-GCST90016926	TRUE	reported	igd
family	20	29836081	0.0738409	0.0151678	1.03743e-06	14306	ebi-a-GCST90016926	rs67737557	C	G		|| id:ebi-a-GCST90016926	TRUE	reported	igd
family	1	102960989	-0.0592004	0.0132244	6.73008e-06	14306	ebi-a-GCST90016927	rs1340391	T	C		|| id:ebi-a-GCST90016927	TRUE	reported	igd
family	1	10644351	-0.0740746	0.0147633	1.79511e-06	14306	ebi-a-GCST90016927	rs11585893	A	G		|| id:ebi-a-GCST90016927	TRUE	reported	igd
family	3	77215327	-0.0488038	0.0107412	5.8626e-06	14306	ebi-a-GCST90016927	rs66710942	T	C		|| id:ebi-a-GCST90016927	TRUE	reported	igd
family	3	62019400	-0.0528153	0.0117124	7.64945e-06	14306	ebi-a-GCST90016927	rs2366421	T	A		|| id:ebi-a-GCST90016927	TRUE	reported	igd
family	3	10593224	0.0538565	0.0105251	3.37909e-07	14306	ebi-a-GCST90016927	rs6795673	C	T		|| id:ebi-a-GCST90016927	TRUE	reported	igd
family	6	29143451	0.0818398	0.0170319	1.2942e-06	14306	ebi-a-GCST90016927	rs28757219	T	A		|| id:ebi-a-GCST90016927	TRUE	reported	igd
family	6	41519430	-0.059205	0.0131195	7.48497e-06	14306	ebi-a-GCST90016927	rs13207588	A	G		|| id:ebi-a-GCST90016927	TRUE	reported	igd
family	9	112855426	-0.0607475	0.0129865	3.4209e-06	14306	ebi-a-GCST90016927	rs495004	C	G		|| id:ebi-a-GCST90016927	TRUE	reported	igd
family	13	24910476	0.0604456	0.0129128	2.12711e-06	14306	ebi-a-GCST90016927	rs9507307	C	T		|| id:ebi-a-GCST90016927	TRUE	reported	igd
family	14	22045949	-0.0782325	0.0167634	5.01822e-06	14306	ebi-a-GCST90016927	rs2023437	T	C		|| id:ebi-a-GCST90016927	TRUE	reported	igd
family	19	24342250	0.0880978	0.0187002	2.68683e-06	14306	ebi-a-GCST90016927	rs17619981	T	G		|| id:ebi-a-GCST90016927	TRUE	reported	igd
family	20	58605432	0.0812515	0.0164479	6.80973e-07	14306	ebi-a-GCST90016927	rs66474973	G	T		|| id:ebi-a-GCST90016927	TRUE	reported	igd
family	1	242767252	-0.0821108	0.0172701	2.59018e-06	14306	ebi-a-GCST90016928	rs12748533	G	T		|| id:ebi-a-GCST90016928	TRUE	reported	igd
family	2	53139362	-0.176187	0.0347133	5.11835e-07	14306	ebi-a-GCST90016928	rs17043785	T	C		|| id:ebi-a-GCST90016928	TRUE	reported	igd
family	3	158653545	0.122574	0.0272389	7.82781e-06	14306	ebi-a-GCST90016928	rs61508842	T	C		|| id:ebi-a-GCST90016928	TRUE	reported	igd
family	4	149300138	-0.0956546	0.0205228	6.10394e-06	14306	ebi-a-GCST90016928	rs6831034	T	A		|| id:ebi-a-GCST90016928	TRUE	reported	igd
family	5	164763068	0.0842142	0.0183739	8.77829e-06	14306	ebi-a-GCST90016928	rs11135366	C	G		|| id:ebi-a-GCST90016928	TRUE	reported	igd
family	6	63236747	-0.0867065	0.0195709	7.093e-06	14306	ebi-a-GCST90016928	rs78609301	A	G		|| id:ebi-a-GCST90016928	TRUE	reported	igd
family	6	151515172	0.123071	0.0275665	9.49008e-06	14306	ebi-a-GCST90016928	rs10872669	G	A		|| id:ebi-a-GCST90016928	TRUE	reported	igd
family	7	90714667	-0.0850266	0.0163382	3.15559e-07	14306	ebi-a-GCST90016928	rs941000	T	C		|| id:ebi-a-GCST90016928	TRUE	reported	igd
family	15	47340971	0.084048	0.0177806	2.4053e-06	14306	ebi-a-GCST90016928	rs1850003	A	G		|| id:ebi-a-GCST90016928	TRUE	reported	igd
family	17	21205200	0.0843019	0.0187308	8.42946e-06	14306	ebi-a-GCST90016928	rs7217209	C	T		|| id:ebi-a-GCST90016928	TRUE	reported	igd
family	22	25943322	0.0847328	0.0165856	3.82164e-07	14306	ebi-a-GCST90016928	rs738193	T	C		|| id:ebi-a-GCST90016928	TRUE	reported	igd
family	2	192878532	0.0584045	0.0122081	1.57373e-06	14306	ebi-a-GCST90016929	rs13020688	G	A		|| id:ebi-a-GCST90016929	TRUE	reported	igd
family	2	136616754	-0.11707	0.0126703	5.94155e-20	14306	ebi-a-GCST90016929	rs182549	T	C		|| id:ebi-a-GCST90016929	TRUE	reported	igd
family	2	137603404	0.0637133	0.0144305	8.79792e-06	14306	ebi-a-GCST90016929	rs10496759	G	C		|| id:ebi-a-GCST90016929	TRUE	reported	igd
family	2	49906864	0.0577763	0.0117388	8.88055e-07	14306	ebi-a-GCST90016929	rs4567981	T	A		|| id:ebi-a-GCST90016929	TRUE	reported	igd
family	4	161211924	0.0562	0.0126395	7.24136e-06	14306	ebi-a-GCST90016929	rs10857328	T	A		|| id:ebi-a-GCST90016929	TRUE	reported	igd
family	4	1517826	0.053673	0.0120586	8.66204e-06	14306	ebi-a-GCST90016929	rs55888705	A	G		|| id:ebi-a-GCST90016929	TRUE	reported	igd
family	5	521096	0.0569873	0.0116907	1.1517e-06	14306	ebi-a-GCST90016929	rs4957061	T	C		|| id:ebi-a-GCST90016929	TRUE	reported	igd
family	5	142793467	-0.0942612	0.0208421	4.84953e-06	14306	ebi-a-GCST90016929	rs73797465	T	G		|| id:ebi-a-GCST90016929	TRUE	reported	igd
family	5	169748189	-0.0892981	0.0183177	1.03631e-06	14306	ebi-a-GCST90016929	rs76671854	C	G		|| id:ebi-a-GCST90016929	TRUE	reported	igd
family	6	14617591	0.0553965	0.0120669	3.8249e-06	14306	ebi-a-GCST90016929	rs857444	C	T		|| id:ebi-a-GCST90016929	TRUE	reported	igd
family	6	97406220	-0.0914312	0.0202604	7.27998e-06	14306	ebi-a-GCST90016929	rs6899771	A	G		|| id:ebi-a-GCST90016929	TRUE	reported	igd
family	11	13098051	0.0537537	0.0123746	9.94741e-06	14306	ebi-a-GCST90016929	rs10831953	G	A		|| id:ebi-a-GCST90016929	TRUE	reported	igd
family	12	20378911	-0.0613031	0.0128844	2.28066e-06	14306	ebi-a-GCST90016929	rs10841473	G	C		|| id:ebi-a-GCST90016929	TRUE	reported	igd
family	13	112859829	0.110676	0.0200996	1.74032e-08	14306	ebi-a-GCST90016929	rs7322849	T	C		|| id:ebi-a-GCST90016929	TRUE	reported	igd
family	15	92463303	-0.0551726	0.0124655	6.86784e-06	14306	ebi-a-GCST90016929	rs7174549	T	C		|| id:ebi-a-GCST90016929	TRUE	reported	igd
family	16	898055	0.0810099	0.019073	8.52884e-06	14306	ebi-a-GCST90016929	rs12446429	T	C		|| id:ebi-a-GCST90016929	TRUE	reported	igd
family	17	72897722	-0.0632518	0.013817	5.36809e-06	14306	ebi-a-GCST90016929	rs540489	T	G		|| id:ebi-a-GCST90016929	TRUE	reported	igd
family	18	4304187	-0.0728589	0.0164821	6.00109e-06	14306	ebi-a-GCST90016929	rs677208	C	G		|| id:ebi-a-GCST90016929	TRUE	reported	igd
family	1	3041519	0.0563367	0.012392	5.27024e-06	14306	ebi-a-GCST90016931	rs2817172	C	T		|| id:ebi-a-GCST90016931	TRUE	reported	igd
family	1	101804809	0.0536759	0.0119436	8.09823e-06	14306	ebi-a-GCST90016931	rs10875374	T	C		|| id:ebi-a-GCST90016931	TRUE	reported	igd
family	3	132596627	0.0748236	0.016246	5.33962e-06	14306	ebi-a-GCST90016931	rs12186080	G	A		|| id:ebi-a-GCST90016931	TRUE	reported	igd
family	3	111482845	-0.0616944	0.013693	6.9051e-06	14306	ebi-a-GCST90016931	rs12490337	C	G		|| id:ebi-a-GCST90016931	TRUE	reported	igd
family	6	48093014	0.0615805	0.0136198	9.07716e-06	14306	ebi-a-GCST90016931	rs62397761	A	G		|| id:ebi-a-GCST90016931	TRUE	reported	igd
family	6	165722832	-0.0734787	0.0168383	7.0912e-06	14306	ebi-a-GCST90016931	rs550843	T	C		|| id:ebi-a-GCST90016931	TRUE	reported	igd
family	7	30934659	-0.106376	0.0241944	7.42147e-06	14306	ebi-a-GCST90016931	rs4723021	T	C		|| id:ebi-a-GCST90016931	TRUE	reported	igd
family	9	136710881	0.0814503	0.0179338	4.54485e-06	14306	ebi-a-GCST90016931	rs12341505	G	A		|| id:ebi-a-GCST90016931	TRUE	reported	igd
family	10	43270264	-0.180969	0.0390911	3.80627e-06	14306	ebi-a-GCST90016931	rs2795528	G	A		|| id:ebi-a-GCST90016931	TRUE	reported	igd
family	16	87710690	0.0967773	0.0217471	8.24442e-06	14306	ebi-a-GCST90016931	rs56188186	A	G		|| id:ebi-a-GCST90016931	TRUE	reported	igd
family	22	47806774	0.0533035	0.0119011	7.8966e-06	14306	ebi-a-GCST90016931	rs881532	G	A		|| id:ebi-a-GCST90016931	TRUE	reported	igd
family	1	71391694	-0.078598	0.0165982	2.36706e-06	14306	ebi-a-GCST90016932	rs7538034	T	G		|| id:ebi-a-GCST90016932	TRUE	reported	igd
family	1	56849539	0.0662317	0.0138147	1.79287e-06	14306	ebi-a-GCST90016932	rs6588624	A	G		|| id:ebi-a-GCST90016932	TRUE	reported	igd
family	2	205616346	-0.165419	0.0352154	4.3723e-06	14306	ebi-a-GCST90016932	rs13409132	A	G		|| id:ebi-a-GCST90016932	TRUE	reported	igd
family	2	229942951	-0.0746375	0.0159136	2.50196e-06	14306	ebi-a-GCST90016932	rs2191834	T	G		|| id:ebi-a-GCST90016932	TRUE	reported	igd
family	2	202450739	-0.0613825	0.0138976	9.33061e-06	14306	ebi-a-GCST90016932	rs6755871	C	G		|| id:ebi-a-GCST90016932	TRUE	reported	igd
family	3	15564453	0.070194	0.0155364	6.84715e-06	14306	ebi-a-GCST90016932	rs989682	A	G		|| id:ebi-a-GCST90016932	TRUE	reported	igd
family	4	155632958	-0.0626993	0.0139364	6.82763e-06	14306	ebi-a-GCST90016932	rs10517600	G	T		|| id:ebi-a-GCST90016932	TRUE	reported	igd
family	5	4308946	-0.117807	0.026924	7.66214e-06	14306	ebi-a-GCST90016932	rs34088226	A	G		|| id:ebi-a-GCST90016932	TRUE	reported	igd
family	5	142244898	-0.116224	0.0240367	3.94357e-06	14306	ebi-a-GCST90016932	rs7725895	A	G		|| id:ebi-a-GCST90016932	TRUE	reported	igd
family	8	3305122	0.116908	0.0252447	4.85333e-06	14306	ebi-a-GCST90016932	rs66714985	A	C		|| id:ebi-a-GCST90016932	TRUE	reported	igd
family	8	123977538	0.214464	0.0455098	3.43598e-06	14306	ebi-a-GCST90016932	rs118104867	C	T		|| id:ebi-a-GCST90016932	TRUE	reported	igd
family	10	6714424	-0.0672314	0.0147123	5.04836e-06	14306	ebi-a-GCST90016932	rs10904722	C	T		|| id:ebi-a-GCST90016932	TRUE	reported	igd
family	14	85856796	0.0769254	0.0172234	7.91425e-06	14306	ebi-a-GCST90016932	rs17121075	G	A		|| id:ebi-a-GCST90016932	TRUE	reported	igd
family	15	87392290	-0.131519	0.0261319	4.97038e-07	14306	ebi-a-GCST90016932	rs55682560	C	T		|| id:ebi-a-GCST90016932	TRUE	reported	igd
family	17	58149405	0.137134	0.0266996	6.95697e-07	14306	ebi-a-GCST90016932	rs28691777	C	T		|| id:ebi-a-GCST90016932	TRUE	reported	igd
family	18	74373125	-0.0643682	0.0138701	3.58286e-06	14306	ebi-a-GCST90016932	rs7226487	A	G		|| id:ebi-a-GCST90016932	TRUE	reported	igd
family	21	38612024	-0.0738925	0.0150911	1.05271e-06	14306	ebi-a-GCST90016932	rs9979874	G	C		|| id:ebi-a-GCST90016932	TRUE	reported	igd
family	1	176571431	-0.0603429	0.0126849	1.51604e-06	14306	ebi-a-GCST90016933	rs240104	T	C		|| id:ebi-a-GCST90016933	TRUE	reported	igd
family	3	11654412	0.116408	0.0258545	9.02693e-06	14306	ebi-a-GCST90016933	rs2442778	A	G		|| id:ebi-a-GCST90016933	TRUE	reported	igd
family	5	90471451	0.0498855	0.0112446	9.77372e-06	14306	ebi-a-GCST90016933	rs1397793	A	G		|| id:ebi-a-GCST90016933	TRUE	reported	igd
family	5	459415	0.25584	0.0561995	4.65693e-06	14306	ebi-a-GCST90016933	rs80046645	C	G		|| id:ebi-a-GCST90016933	TRUE	reported	igd
family	5	125460084	0.0774888	0.0171877	5.63093e-06	14306	ebi-a-GCST90016933	rs76779974	C	G		|| id:ebi-a-GCST90016933	TRUE	reported	igd
family	7	105084680	-0.0565686	0.0126265	7.79938e-06	14306	ebi-a-GCST90016933	rs13307134	T	C		|| id:ebi-a-GCST90016933	TRUE	reported	igd
family	7	24464799	-0.0486059	0.0108982	7.87281e-06	14306	ebi-a-GCST90016933	rs62448869	T	A		|| id:ebi-a-GCST90016933	TRUE	reported	igd
family	9	136512906	0.0926543	0.0209468	8.26913e-06	14306	ebi-a-GCST90016933	rs3025411	A	G		|| id:ebi-a-GCST90016933	TRUE	reported	igd
family	10	1922731	0.06075	0.0130939	4.82848e-06	14306	ebi-a-GCST90016933	rs11250875	T	C		|| id:ebi-a-GCST90016933	TRUE	reported	igd
family	10	65799217	0.0778402	0.0155815	5.43313e-07	14306	ebi-a-GCST90016933	rs719099	A	G		|| id:ebi-a-GCST90016933	TRUE	reported	igd
family	12	11494021	0.0586265	0.0129006	4.84117e-06	14306	ebi-a-GCST90016933	rs1816223	G	A		|| id:ebi-a-GCST90016933	TRUE	reported	igd
family	14	39660509	0.103377	0.0229286	6.8962e-06	14306	ebi-a-GCST90016933	rs8010111	A	G		|| id:ebi-a-GCST90016933	TRUE	reported	igd
family	15	86433579	-0.0510212	0.0114339	8.14442e-06	14306	ebi-a-GCST90016933	rs11073596	G	T		|| id:ebi-a-GCST90016933	TRUE	reported	igd
family	17	37376685	0.0965017	0.0207666	3.88356e-06	14306	ebi-a-GCST90016933	rs34739816	G	T		|| id:ebi-a-GCST90016933	TRUE	reported	igd
family	17	8121332	0.0773006	0.017553	8.0201e-06	14306	ebi-a-GCST90016933	rs11656361	A	C		|| id:ebi-a-GCST90016933	TRUE	reported	igd
family	19	52895166	0.0789796	0.0177205	8.51236e-06	14306	ebi-a-GCST90016933	rs12974142	G	A		|| id:ebi-a-GCST90016933	TRUE	reported	igd
family	20	62072077	-0.0714367	0.0154113	5.39126e-06	14306	ebi-a-GCST90016933	rs67561917	A	G		|| id:ebi-a-GCST90016933	TRUE	reported	igd
family	1	85205632	-0.138357	0.0295185	3.41374e-06	14306	ebi-a-GCST90016934	rs9725395	A	G		|| id:ebi-a-GCST90016934	TRUE	reported	igd
family	1	118723685	-0.0801923	0.0167061	1.692e-06	14306	ebi-a-GCST90016934	rs1582238	C	T		|| id:ebi-a-GCST90016934	TRUE	reported	igd
family	3	72207794	0.0977203	0.0197033	9.42193e-07	14306	ebi-a-GCST90016934	rs4677103	A	G		|| id:ebi-a-GCST90016934	TRUE	reported	igd
family	4	122202910	-0.134314	0.0292201	4.58121e-06	14306	ebi-a-GCST90016934	rs17051335	C	T		|| id:ebi-a-GCST90016934	TRUE	reported	igd
family	4	147414743	-0.149751	0.0293415	2.75778e-07	14306	ebi-a-GCST90016934	rs72731813	C	T		|| id:ebi-a-GCST90016934	TRUE	reported	igd
family	7	79734541	0.107106	0.0238173	5.56327e-06	14306	ebi-a-GCST90016934	rs28696126	T	A		|| id:ebi-a-GCST90016934	TRUE	reported	igd
family	9	93331308	0.123954	0.0289814	9.48135e-06	14306	ebi-a-GCST90016934	rs540220	C	T		|| id:ebi-a-GCST90016934	TRUE	reported	igd
family	9	8786663	0.110761	0.0232545	2.7503e-06	14306	ebi-a-GCST90016934	rs112893842	T	C		|| id:ebi-a-GCST90016934	TRUE	reported	igd
family	10	66407366	-0.0708803	0.0156121	5.86017e-06	14306	ebi-a-GCST90016934	rs4344384	T	G		|| id:ebi-a-GCST90016934	TRUE	reported	igd
family	18	59026148	0.070223	0.0156601	7.85905e-06	14306	ebi-a-GCST90016934	rs1908593	T	C		|| id:ebi-a-GCST90016934	TRUE	reported	igd
family	21	41811003	0.177314	0.0361844	1.40608e-06	14306	ebi-a-GCST90016934	rs55658617	T	C		|| id:ebi-a-GCST90016934	TRUE	reported	igd
family	22	24804081	0.139014	0.0299429	4.60829e-06	14306	ebi-a-GCST90016934	rs9608282	T	G		|| id:ebi-a-GCST90016934	TRUE	reported	igd
family	1	203308383	-0.0732697	0.0150964	2.39651e-06	14306	ebi-a-GCST90016935	rs16851319	G	C		|| id:ebi-a-GCST90016935	TRUE	reported	igd
family	1	203991605	-0.114231	0.0253568	1.5639e-06	14306	ebi-a-GCST90016935	rs2692012	G	A		|| id:ebi-a-GCST90016935	TRUE	reported	igd
family	2	233929283	-0.0525838	0.0115757	6.78141e-06	14306	ebi-a-GCST90016935	rs3935584	C	T		|| id:ebi-a-GCST90016935	TRUE	reported	igd
family	8	57865378	-0.0770089	0.017089	9.60882e-06	14306	ebi-a-GCST90016935	rs72647048	T	C		|| id:ebi-a-GCST90016935	TRUE	reported	igd
family	9	81834426	-0.0729251	0.0154381	2.09677e-06	14306	ebi-a-GCST90016935	rs17791387	A	G		|| id:ebi-a-GCST90016935	TRUE	reported	igd
family	9	15269705	0.211435	0.0456962	2.81877e-06	14306	ebi-a-GCST90016935	rs112381107	C	T		|| id:ebi-a-GCST90016935	TRUE	reported	igd
family	10	11855599	0.0555931	0.0117493	2.49701e-06	14306	ebi-a-GCST90016935	rs11599763	C	T		|| id:ebi-a-GCST90016935	TRUE	reported	igd
family	15	96159374	-0.0574455	0.0129468	7.34345e-06	14306	ebi-a-GCST90016935	rs7164160	A	T		|| id:ebi-a-GCST90016935	TRUE	reported	igd
family	16	71541641	-0.0541732	0.0117819	4.48477e-06	14306	ebi-a-GCST90016935	rs9928243	C	A		|| id:ebi-a-GCST90016935	TRUE	reported	igd
family	17	2856662	-0.0943381	0.020138	3.16046e-06	14306	ebi-a-GCST90016935	rs4506934	C	T		|| id:ebi-a-GCST90016935	TRUE	reported	igd
family	20	33694801	0.0834742	0.0166111	2.69911e-07	14306	ebi-a-GCST90016935	rs6058181	C	T		|| id:ebi-a-GCST90016935	TRUE	reported	igd
family	21	45064961	0.0571419	0.012423	3.82375e-06	14306	ebi-a-GCST90016935	rs2838334	G	A		|| id:ebi-a-GCST90016935	TRUE	reported	igd
family	2	4015933	0.0990404	0.0215877	6.95312e-06	14306	ebi-a-GCST90016936	rs80319214	C	G		|| id:ebi-a-GCST90016936	TRUE	reported	igd
family	2	42133542	0.0582927	0.0126195	4.51617e-06	14306	ebi-a-GCST90016936	rs2374342	C	A		|| id:ebi-a-GCST90016936	TRUE	reported	igd
family	11	2563450	0.110561	0.0241719	3.65359e-06	14306	ebi-a-GCST90016936	rs111229068	A	T		|| id:ebi-a-GCST90016936	TRUE	reported	igd
family	11	22379097	0.0822408	0.0186379	9.42692e-06	14306	ebi-a-GCST90016936	rs11026530	T	C		|| id:ebi-a-GCST90016936	TRUE	reported	igd
family	13	110840418	0.0758597	0.0171286	9.31859e-06	14306	ebi-a-GCST90016936	rs79757635	C	A		|| id:ebi-a-GCST90016936	TRUE	reported	igd
family	14	27718039	-0.0605392	0.0133696	8.53532e-06	14306	ebi-a-GCST90016936	rs61973590	C	G		|| id:ebi-a-GCST90016936	TRUE	reported	igd
family	16	54327745	0.0899642	0.0202934	7.63115e-06	14306	ebi-a-GCST90016936	rs35673018	G	A		|| id:ebi-a-GCST90016936	TRUE	reported	igd
family	17	13521040	0.115598	0.0257683	9.48965e-06	14306	ebi-a-GCST90016936	rs4792380	A	T		|| id:ebi-a-GCST90016936	TRUE	reported	igd
family	18	55145547	0.084159	0.0189479	5.17095e-06	14306	ebi-a-GCST90016936	rs504442	T	G		|| id:ebi-a-GCST90016936	TRUE	reported	igd
family	18	57672335	-0.0848521	0.0170415	1.19564e-06	14306	ebi-a-GCST90016936	rs78143293	A	G		|| id:ebi-a-GCST90016936	TRUE	reported	igd
family	20	55340092	0.0606754	0.0130125	3.13163e-06	14306	ebi-a-GCST90016936	rs62210023	A	G		|| id:ebi-a-GCST90016936	TRUE	reported	igd
family	1	97457427	-0.0497374	0.0111376	8.02897e-06	14306	ebi-a-GCST90016937	rs290833	T	G		|| id:ebi-a-GCST90016937	TRUE	reported	igd
family	1	64139196	-0.0475363	0.0106939	9.52708e-06	14306	ebi-a-GCST90016937	rs1884466	C	T		|| id:ebi-a-GCST90016937	TRUE	reported	igd
family	3	195793712	-0.0524152	0.0106784	8.95468e-07	14306	ebi-a-GCST90016937	rs2300774	A	G		|| id:ebi-a-GCST90016937	TRUE	reported	igd
family	5	3002546	-0.0492438	0.010887	6.14582e-06	14306	ebi-a-GCST90016937	rs1074800	G	A		|| id:ebi-a-GCST90016937	TRUE	reported	igd
family	8	38803551	0.0681159	0.0127883	1.12264e-07	14306	ebi-a-GCST90016937	rs62504403	C	T		|| id:ebi-a-GCST90016937	TRUE	reported	igd
family	8	2954952	0.0839071	0.0199131	9.28453e-06	14306	ebi-a-GCST90016937	rs7826267	G	T		|| id:ebi-a-GCST90016937	TRUE	reported	igd
family	10	133897233	-0.0552212	0.0116074	2.33115e-06	14306	ebi-a-GCST90016937	rs10781552	C	T		|| id:ebi-a-GCST90016937	TRUE	reported	igd
family	13	40385457	0.10305	0.0224648	2.79126e-06	14306	ebi-a-GCST90016937	rs17530232	A	G		|| id:ebi-a-GCST90016937	TRUE	reported	igd
family	14	80357610	0.0724145	0.0164471	5.40344e-06	14306	ebi-a-GCST90016937	rs56970041	T	G		|| id:ebi-a-GCST90016937	TRUE	reported	igd
family	14	48997206	0.0608929	0.0133764	4.23107e-06	14306	ebi-a-GCST90016937	rs4078432	T	C		|| id:ebi-a-GCST90016937	TRUE	reported	igd
family	14	56156504	0.0538798	0.0116888	4.08479e-06	14306	ebi-a-GCST90016937	rs8003149	C	T		|| id:ebi-a-GCST90016937	TRUE	reported	igd
family	17	70327224	-0.0806041	0.0167641	1.8451e-06	14306	ebi-a-GCST90016937	rs35161940	T	C		|| id:ebi-a-GCST90016937	TRUE	reported	igd
family	18	5830507	-0.0945759	0.0194091	9.12347e-07	14306	ebi-a-GCST90016937	rs7234058	T	C		|| id:ebi-a-GCST90016937	TRUE	reported	igd
family	1	239995451	-0.117998	0.025516	4.79789e-06	14306	ebi-a-GCST90016938	rs488164	G	T		|| id:ebi-a-GCST90016938	TRUE	reported	igd
family	4	119955787	0.128253	0.0274718	3.38556e-06	14306	ebi-a-GCST90016938	rs3733511	A	G		|| id:ebi-a-GCST90016938	TRUE	reported	igd
family	7	148921732	-0.177599	0.0372795	2.70222e-06	14306	ebi-a-GCST90016938	rs11547158	A	G		|| id:ebi-a-GCST90016938	TRUE	reported	igd
family	9	115821485	-0.162115	0.032151	5.78309e-07	14306	ebi-a-GCST90016938	rs10759623	C	T		|| id:ebi-a-GCST90016938	TRUE	reported	igd
family	11	35334668	-0.116383	0.0252125	3.97109e-06	14306	ebi-a-GCST90016938	rs17379710	T	C		|| id:ebi-a-GCST90016938	TRUE	reported	igd
family	11	95357209	-0.150538	0.0302319	6.63437e-07	14306	ebi-a-GCST90016938	rs2155352	A	G		|| id:ebi-a-GCST90016938	TRUE	reported	igd
family	16	54115200	-0.117677	0.0251491	3.19374e-06	14306	ebi-a-GCST90016938	rs697771	A	G		|| id:ebi-a-GCST90016938	TRUE	reported	igd
family	16	64956642	0.224835	0.0511672	8.4126e-06	14306	ebi-a-GCST90016938	rs78222136	G	C		|| id:ebi-a-GCST90016938	TRUE	reported	igd
family	18	43345864	-0.112486	0.0251099	9.42671e-06	14306	ebi-a-GCST90016938	rs2156611	T	C		|| id:ebi-a-GCST90016938	TRUE	reported	igd
family	20	55348292	-0.118619	0.0261969	7.07082e-06	14306	ebi-a-GCST90016938	rs6025153	C	G		|| id:ebi-a-GCST90016938	TRUE	reported	igd
family	1	39212021	0.0651136	0.0144251	8.08295e-06	14306	ebi-a-GCST90016939	rs66753613	G	A		|| id:ebi-a-GCST90016939	TRUE	reported	igd
family	1	186914023	-0.0663236	0.0141626	3.91643e-06	14306	ebi-a-GCST90016939	rs7514702	T	C		|| id:ebi-a-GCST90016939	TRUE	reported	igd
family	1	65170838	0.0579979	0.0129602	9.65384e-06	14306	ebi-a-GCST90016939	rs1887048	G	A		|| id:ebi-a-GCST90016939	TRUE	reported	igd
family	1	166557202	0.0596528	0.012717	3.72349e-06	14306	ebi-a-GCST90016939	rs482905	G	T		|| id:ebi-a-GCST90016939	TRUE	reported	igd
family	3	88995218	-0.0805985	0.0171364	4.89283e-06	14306	ebi-a-GCST90016939	rs6797051	C	T		|| id:ebi-a-GCST90016939	TRUE	reported	igd
family	3	32373530	-0.112091	0.0271305	8.38475e-06	14306	ebi-a-GCST90016939	rs4293737	A	G		|| id:ebi-a-GCST90016939	TRUE	reported	igd
family	4	162211872	-0.0550907	0.0116474	2.41524e-06	14306	ebi-a-GCST90016939	rs12643275	A	T		|| id:ebi-a-GCST90016939	TRUE	reported	igd
family	10	102366896	0.151619	0.0317112	1.80356e-06	14306	ebi-a-GCST90016939	rs118170811	A	G		|| id:ebi-a-GCST90016939	TRUE	reported	igd
family	10	7906746	-0.0516394	0.0112313	4.76091e-06	14306	ebi-a-GCST90016939	rs7076829	T	A		|| id:ebi-a-GCST90016939	TRUE	reported	igd
family	15	50802980	-0.0508511	0.011014	4.04027e-06	14306	ebi-a-GCST90016939	rs3098182	T	G		|| id:ebi-a-GCST90016939	TRUE	reported	igd
family	15	94105415	-0.0851896	0.0192688	7.67414e-06	14306	ebi-a-GCST90016939	rs12904405	A	G		|| id:ebi-a-GCST90016939	TRUE	reported	igd
family	17	70218627	0.0561559	0.0115587	1.23726e-06	14306	ebi-a-GCST90016939	rs6501525	A	G		|| id:ebi-a-GCST90016939	TRUE	reported	igd
family	19	16174657	0.0503183	0.011165	6.99021e-06	14306	ebi-a-GCST90016939	rs10404377	A	C		|| id:ebi-a-GCST90016939	TRUE	reported	igd
family	21	19685992	-0.0637366	0.013927	2.53805e-06	14306	ebi-a-GCST90016939	rs1999289	A	T		|| id:ebi-a-GCST90016939	TRUE	reported	igd
family	1	214031969	-0.0484566	0.0107934	7.26742e-06	14306	ebi-a-GCST90016940	rs12760724	A	C		|| id:ebi-a-GCST90016940	TRUE	reported	igd
family	1	117031337	-0.0515295	0.01067	1.42945e-06	14306	ebi-a-GCST90016940	rs12562372	G	T		|| id:ebi-a-GCST90016940	TRUE	reported	igd
family	2	232469722	-0.0993483	0.0218395	8.37067e-06	14306	ebi-a-GCST90016940	rs13005175	G	A		|| id:ebi-a-GCST90016940	TRUE	reported	igd
family	4	186906801	0.0493666	0.0107801	5.16952e-06	14306	ebi-a-GCST90016940	rs959845	T	C		|| id:ebi-a-GCST90016940	TRUE	reported	igd
family	4	10245354	-0.0585831	0.0128742	3.69556e-06	14306	ebi-a-GCST90016940	rs2159863	A	G		|| id:ebi-a-GCST90016940	TRUE	reported	igd
family	5	32348593	-0.160302	0.035832	8.41977e-06	14306	ebi-a-GCST90016940	rs2910921	C	T		|| id:ebi-a-GCST90016940	TRUE	reported	igd
family	6	161957425	-0.049227	0.0104894	2.6898e-06	14306	ebi-a-GCST90016940	rs11755180	C	G		|| id:ebi-a-GCST90016940	TRUE	reported	igd
family	6	46664437	-0.215114	0.0476778	6.53236e-06	14306	ebi-a-GCST90016940	rs146660815	T	C		|| id:ebi-a-GCST90016940	TRUE	reported	igd
family	7	130436459	-0.0500924	0.0105069	1.81844e-06	14306	ebi-a-GCST90016940	rs11979110	T	C		|| id:ebi-a-GCST90016940	TRUE	reported	igd
family	9	72179847	-0.0494463	0.0110503	4.26265e-06	14306	ebi-a-GCST90016940	rs11139361	C	T		|| id:ebi-a-GCST90016940	TRUE	reported	igd
family	9	133791605	0.0776723	0.0164472	3.01426e-06	14306	ebi-a-GCST90016940	rs79086868	T	C		|| id:ebi-a-GCST90016940	TRUE	reported	igd
family	9	100113683	-0.0607481	0.0125216	2.44997e-06	14306	ebi-a-GCST90016940	rs35524804	T	C		|| id:ebi-a-GCST90016940	TRUE	reported	igd
family	10	103392503	-0.0503537	0.0112201	6.20326e-06	14306	ebi-a-GCST90016940	rs3127230	C	T		|| id:ebi-a-GCST90016940	TRUE	reported	igd
family	13	38004672	-0.0718128	0.017462	9.57767e-06	14306	ebi-a-GCST90016940	rs11841382	G	T		|| id:ebi-a-GCST90016940	TRUE	reported	igd
family	16	76559184	-0.125721	0.0245233	2.83596e-07	14306	ebi-a-GCST90016940	rs9929145	G	A		|| id:ebi-a-GCST90016940	TRUE	reported	igd
family	17	80469064	0.0549584	0.0117086	2.41835e-06	14306	ebi-a-GCST90016940	rs112040820	A	G		|| id:ebi-a-GCST90016940	TRUE	reported	igd
family	19	29408858	0.0503142	0.0112482	5.35895e-06	14306	ebi-a-GCST90016940	rs7359994	C	T		|| id:ebi-a-GCST90016940	TRUE	reported	igd
family	19	13425799	0.0661701	0.014851	7.58351e-06	14306	ebi-a-GCST90016940	rs10402491	C	T		|| id:ebi-a-GCST90016940	TRUE	reported	igd
family	20	36876868	0.0501415	0.0112157	7.28836e-06	14306	ebi-a-GCST90016940	rs1205443	A	G		|| id:ebi-a-GCST90016940	TRUE	reported	igd
family	1	18501459	-0.193287	0.0379293	2.70128e-07	14306	ebi-a-GCST90016941	rs16861661	G	A		|| id:ebi-a-GCST90016941	TRUE	reported	igd
family	1	179720669	0.191613	0.0425039	7.6952e-06	14306	ebi-a-GCST90016941	rs74599091	A	G		|| id:ebi-a-GCST90016941	TRUE	reported	igd
family	2	135755629	0.0772453	0.0176921	9.6525e-06	14306	ebi-a-GCST90016941	rs1530559	G	A		|| id:ebi-a-GCST90016941	TRUE	reported	igd
family	2	28903275	-0.0830224	0.0175267	2.59543e-06	14306	ebi-a-GCST90016941	rs11674854	C	T		|| id:ebi-a-GCST90016941	TRUE	reported	igd
family	3	173151665	-0.219178	0.0473566	5.9595e-06	14306	ebi-a-GCST90016941	rs77478751	A	G		|| id:ebi-a-GCST90016941	TRUE	reported	igd
family	4	109896462	0.177082	0.0392269	6.59189e-06	14306	ebi-a-GCST90016941	rs62314653	C	A		|| id:ebi-a-GCST90016941	TRUE	reported	igd
family	6	67559323	-0.124042	0.0278946	9.44583e-06	14306	ebi-a-GCST90016941	rs9345899	A	G		|| id:ebi-a-GCST90016941	TRUE	reported	igd
family	8	69010103	-0.0792344	0.0170604	3.60761e-06	14306	ebi-a-GCST90016941	rs768253	T	G		|| id:ebi-a-GCST90016941	TRUE	reported	igd
family	13	23836941	-0.10381	0.0220135	3.89933e-06	14306	ebi-a-GCST90016941	rs1590596	C	G		|| id:ebi-a-GCST90016941	TRUE	reported	igd
family	16	73890910	0.082529	0.0168225	8.69121e-07	14306	ebi-a-GCST90016941	rs328312	T	A		|| id:ebi-a-GCST90016941	TRUE	reported	igd
family	19	6928017	0.0999419	0.0201687	5.77192e-07	14306	ebi-a-GCST90016941	rs921925	A	C		|| id:ebi-a-GCST90016941	TRUE	reported	igd
family	20	54192992	-0.0825646	0.0170282	1.38159e-06	14306	ebi-a-GCST90016941	rs6092149	A	T		|| id:ebi-a-GCST90016941	TRUE	reported	igd
family	2	125440268	0.121754	0.0235357	3.01432e-07	14306	ebi-a-GCST90016942	rs10202904	G	T		|| id:ebi-a-GCST90016942	TRUE	reported	igd
family	3	2086167	0.164498	0.0364959	7.44338e-06	14306	ebi-a-GCST90016942	rs4257531	G	A		|| id:ebi-a-GCST90016942	TRUE	reported	igd
family	3	15053083	-0.199566	0.0411825	1.63061e-06	14306	ebi-a-GCST90016942	rs6776814	T	C		|| id:ebi-a-GCST90016942	TRUE	reported	igd
family	4	104418307	0.216999	0.0449076	1.87556e-06	14306	ebi-a-GCST90016942	rs894996	C	A		|| id:ebi-a-GCST90016942	TRUE	reported	igd
family	5	178160975	0.178661	0.039298	6.17988e-06	14306	ebi-a-GCST90016942	rs56131665	G	A		|| id:ebi-a-GCST90016942	TRUE	reported	igd
family	7	10773932	-0.15814	0.0351803	8.44578e-06	14306	ebi-a-GCST90016942	rs73068003	G	T		|| id:ebi-a-GCST90016942	TRUE	reported	igd
family	11	89349287	0.111465	0.0250516	6.51869e-06	14306	ebi-a-GCST90016942	rs11018665	A	T		|| id:ebi-a-GCST90016942	TRUE	reported	igd
family	12	43701132	-0.216781	0.0493496	6.07561e-06	14306	ebi-a-GCST90016942	rs12825290	C	G		|| id:ebi-a-GCST90016942	TRUE	reported	igd
family	12	21338861	-0.227245	0.048763	5.92107e-06	14306	ebi-a-GCST90016942	rs75208022	C	T		|| id:ebi-a-GCST90016942	TRUE	reported	igd
family	13	41956181	0.21534	0.0436695	1.40854e-06	14306	ebi-a-GCST90016942	rs73457410	A	G		|| id:ebi-a-GCST90016942	TRUE	reported	igd
family	19	28827760	-0.153519	0.0344519	8.22527e-06	14306	ebi-a-GCST90016942	rs6508769	C	T		|| id:ebi-a-GCST90016942	TRUE	reported	igd
family	19	46439321	0.111274	0.0247517	9.27897e-06	14306	ebi-a-GCST90016942	rs10424197	A	G		|| id:ebi-a-GCST90016942	TRUE	reported	igd
family	2	16056779	0.109751	0.0238636	4.21143e-06	14306	ebi-a-GCST90016943	rs934049	G	A		|| id:ebi-a-GCST90016943	TRUE	reported	igd
family	3	171947435	0.12561	0.0230053	4.87933e-08	14306	ebi-a-GCST90016943	rs4428215	G	A		|| id:ebi-a-GCST90016943	TRUE	reported	igd
family	4	84254259	-0.16332	0.0360823	8.04841e-06	14306	ebi-a-GCST90016943	rs12509763	C	G		|| id:ebi-a-GCST90016943	TRUE	reported	igd
family	4	67427392	-0.18756	0.0423688	6.64003e-06	14306	ebi-a-GCST90016943	rs80330081	A	C		|| id:ebi-a-GCST90016943	TRUE	reported	igd
family	4	189935314	0.181604	0.0398742	6.25792e-06	14306	ebi-a-GCST90016943	rs36057338	G	T		|| id:ebi-a-GCST90016943	TRUE	reported	igd
family	6	38550301	-0.140043	0.0281704	7.45178e-07	14306	ebi-a-GCST90016943	rs1569853	T	C		|| id:ebi-a-GCST90016943	TRUE	reported	igd
family	7	1794263	0.181521	0.0400608	7.4583e-06	14306	ebi-a-GCST90016943	rs62435498	C	A		|| id:ebi-a-GCST90016943	TRUE	reported	igd
family	9	87514407	-0.105642	0.0200648	1.49417e-07	14306	ebi-a-GCST90016943	rs736744	T	C		|| id:ebi-a-GCST90016943	TRUE	reported	igd
family	9	19682558	0.196145	0.044523	5.53197e-06	14306	ebi-a-GCST90016943	rs12002250	A	C		|| id:ebi-a-GCST90016943	TRUE	reported	igd
family	11	610277	-0.13607	0.0291797	4.50837e-06	14306	ebi-a-GCST90016943	rs11246212	C	T		|| id:ebi-a-GCST90016943	TRUE	reported	igd
family	12	18793583	0.105525	0.0236769	7.19383e-06	14306	ebi-a-GCST90016943	rs561239	A	G		|| id:ebi-a-GCST90016943	TRUE	reported	igd
family	13	23443627	-0.0921059	0.0201114	5.03733e-06	14306	ebi-a-GCST90016943	rs7993559	A	C		|| id:ebi-a-GCST90016943	TRUE	reported	igd
family	15	93941937	0.204031	0.0445746	4.56321e-06	14306	ebi-a-GCST90016943	rs111966731	T	C		|| id:ebi-a-GCST90016943	TRUE	reported	igd
family	16	5984558	-0.189444	0.0430248	8.09003e-06	14306	ebi-a-GCST90016943	rs17138946	G	T		|| id:ebi-a-GCST90016943	TRUE	reported	igd
family	22	37421469	-0.118383	0.0241355	7.3872e-07	14306	ebi-a-GCST90016943	rs6000536	C	T		|| id:ebi-a-GCST90016943	TRUE	reported	igd
family	3	97972214	-0.222573	0.0484634	8.71325e-06	14306	ebi-a-GCST90016944	rs73139353	A	C		|| id:ebi-a-GCST90016944	TRUE	reported	igd
family	5	26531908	0.13988	0.0303029	3.3522e-06	14306	ebi-a-GCST90016944	rs72756943	G	A		|| id:ebi-a-GCST90016944	TRUE	reported	igd
family	6	55448491	-0.0881865	0.0169965	2.476e-07	14306	ebi-a-GCST90016944	rs9382510	C	T		|| id:ebi-a-GCST90016944	TRUE	reported	igd
family	6	129224488	0.102214	0.0197189	3.04902e-07	14306	ebi-a-GCST90016944	rs12191680	C	G		|| id:ebi-a-GCST90016944	TRUE	reported	igd
family	7	116918060	-0.0781862	0.0175366	7.74819e-06	14306	ebi-a-GCST90016944	rs6972479	A	G		|| id:ebi-a-GCST90016944	TRUE	reported	igd
family	9	6818307	-0.118018	0.0259206	7.2267e-06	14306	ebi-a-GCST90016944	rs62568866	T	A		|| id:ebi-a-GCST90016944	TRUE	reported	igd
family	9	22718481	-0.119902	0.0258219	4.29151e-06	14306	ebi-a-GCST90016944	rs10965428	C	A		|| id:ebi-a-GCST90016944	TRUE	reported	igd
family	9	105650242	-0.241159	0.0498372	2.04894e-06	14306	ebi-a-GCST90016944	rs78909003	T	C		|| id:ebi-a-GCST90016944	TRUE	reported	igd
family	10	94306385	0.24289	0.0500406	1.82856e-06	14306	ebi-a-GCST90016944	rs76022354	C	T		|| id:ebi-a-GCST90016944	TRUE	reported	igd
family	11	9951672	-0.0717634	0.0149229	1.43843e-06	14306	ebi-a-GCST90016944	rs10840326	C	G		|| id:ebi-a-GCST90016944	TRUE	reported	igd
family	12	115491973	0.122729	0.0264958	4.01578e-06	14306	ebi-a-GCST90016944	rs35510	A	G		|| id:ebi-a-GCST90016944	TRUE	reported	igd
family	15	73477482	-0.0670948	0.015239	9.18523e-06	14306	ebi-a-GCST90016944	rs12050685	A	G		|| id:ebi-a-GCST90016944	TRUE	reported	igd
family	16	48742489	-0.113957	0.0256403	7.06627e-06	14306	ebi-a-GCST90016944	rs111582866	G	A		|| id:ebi-a-GCST90016944	TRUE	reported	igd
family	16	84977389	0.0710386	0.0158024	8.22602e-06	14306	ebi-a-GCST90016944	rs9938097	C	T		|| id:ebi-a-GCST90016944	TRUE	reported	igd
family	17	32862601	0.187381	0.0429572	7.31526e-06	14306	ebi-a-GCST90016944	rs16970009	A	G		|| id:ebi-a-GCST90016944	TRUE	reported	igd
family	17	64535013	-0.176406	0.041017	9.0826e-06	14306	ebi-a-GCST90016944	rs9895850	T	C		|| id:ebi-a-GCST90016944	TRUE	reported	igd
family	20	57274077	0.0684647	0.014674	3.44057e-06	14306	ebi-a-GCST90016944	rs6092684	A	T		|| id:ebi-a-GCST90016944	TRUE	reported	igd
family	20	5412480	-0.0986502	0.0216316	9.46303e-06	14306	ebi-a-GCST90016944	rs731534	C	G		|| id:ebi-a-GCST90016944	TRUE	reported	igd
family	22	26891808	0.0685479	0.0149032	4.71846e-06	14306	ebi-a-GCST90016944	rs4822728	T	C		|| id:ebi-a-GCST90016944	TRUE	reported	igd
family	1	27418225	0.064399	0.0141246	5.82237e-06	14306	ebi-a-GCST90016945	rs12144792	C	T		|| id:ebi-a-GCST90016945	TRUE	reported	igd
family	2	188895743	0.0684213	0.0141137	1.46157e-06	14306	ebi-a-GCST90016945	rs12992764	T	G		|| id:ebi-a-GCST90016945	TRUE	reported	igd
family	3	182984048	-0.0739885	0.0150931	1.01109e-06	14306	ebi-a-GCST90016945	rs12634826	T	G		|| id:ebi-a-GCST90016945	TRUE	reported	igd
family	5	89252884	-0.147941	0.0317498	3.40847e-06	14306	ebi-a-GCST90016945	rs75430375	C	T		|| id:ebi-a-GCST90016945	TRUE	reported	igd
family	8	3580757	-0.0910387	0.0185869	1.74193e-06	14306	ebi-a-GCST90016945	rs4990837	G	A		|| id:ebi-a-GCST90016945	TRUE	reported	igd
family	8	28614217	0.0812655	0.0164355	4.94778e-07	14306	ebi-a-GCST90016945	rs35703006	G	T		|| id:ebi-a-GCST90016945	TRUE	reported	igd
family	9	9423378	-0.257982	0.0549569	3.15297e-06	14306	ebi-a-GCST90016945	rs117452796	A	G		|| id:ebi-a-GCST90016945	TRUE	reported	igd
family	10	129175962	0.135774	0.0289757	2.31308e-06	14306	ebi-a-GCST90016945	rs150600492	A	C		|| id:ebi-a-GCST90016945	TRUE	reported	igd
family	13	113561082	-0.0821779	0.0173541	2.02209e-06	14306	ebi-a-GCST90016945	rs75898026	A	G		|| id:ebi-a-GCST90016945	TRUE	reported	igd
family	2	67852836	-0.0509823	0.0111975	5.07762e-06	14306	ebi-a-GCST90016946	rs6721459	G	A		|| id:ebi-a-GCST90016946	TRUE	reported	igd
family	3	151781175	-0.0525658	0.0112476	3.16548e-06	14306	ebi-a-GCST90016946	rs1520207	T	C		|| id:ebi-a-GCST90016946	TRUE	reported	igd
family	4	14324623	-0.0566637	0.012276	4.03395e-06	14306	ebi-a-GCST90016946	rs10805326	A	G		|| id:ebi-a-GCST90016946	TRUE	reported	igd
family	4	171180190	0.0642075	0.0126913	4.21124e-07	14306	ebi-a-GCST90016946	rs4692811	C	T		|| id:ebi-a-GCST90016946	TRUE	reported	igd
family	7	46710977	0.182411	0.0372126	1.02795e-06	14306	ebi-a-GCST90016946	rs117020988	C	T		|| id:ebi-a-GCST90016946	TRUE	reported	igd
family	7	44312824	0.124203	0.0266923	3.24056e-06	14306	ebi-a-GCST90016946	rs76982728	T	C		|| id:ebi-a-GCST90016946	TRUE	reported	igd
family	8	26726641	-0.0558506	0.011224	6.3333e-07	14306	ebi-a-GCST90016946	rs2644627	C	G		|| id:ebi-a-GCST90016946	TRUE	reported	igd
family	9	16786784	-0.252	0.0511627	7.26256e-07	14306	ebi-a-GCST90016946	rs12377846	C	A		|| id:ebi-a-GCST90016946	TRUE	reported	igd
family	10	17019559	0.0919658	0.0161331	9.80122e-09	14306	ebi-a-GCST90016946	rs61841503	G	A		|| id:ebi-a-GCST90016946	TRUE	reported	igd
family	10	14650535	0.106725	0.0245638	8.13711e-06	14306	ebi-a-GCST90016946	rs77540684	T	G		|| id:ebi-a-GCST90016946	TRUE	reported	igd
family	13	77351196	-0.0693637	0.0142907	1.70589e-06	14306	ebi-a-GCST90016946	rs9573937	A	G		|| id:ebi-a-GCST90016946	TRUE	reported	igd
family	16	89246670	-0.0573764	0.0127192	7.69024e-06	14306	ebi-a-GCST90016946	rs59865771	C	T		|| id:ebi-a-GCST90016946	TRUE	reported	igd
family	17	38216487	0.072584	0.0162321	7.89805e-06	14306	ebi-a-GCST90016946	rs1467258	G	A		|| id:ebi-a-GCST90016946	TRUE	reported	igd
family	18	65324280	0.126264	0.0268383	2.48737e-06	14306	ebi-a-GCST90016946	rs75819860	T	A		|| id:ebi-a-GCST90016946	TRUE	reported	igd
family	19	17414138	0.0571818	0.0125947	5.76713e-06	14306	ebi-a-GCST90016946	rs12986312	T	G		|| id:ebi-a-GCST90016946	TRUE	reported	igd
family	22	37976422	-0.0537078	0.011443	2.70085e-06	14306	ebi-a-GCST90016946	rs59987323	C	T		|| id:ebi-a-GCST90016946	TRUE	reported	igd
family	1	240929774	0.0915257	0.0207306	8.37394e-06	14306	ebi-a-GCST90016947	rs35961441	A	C		|| id:ebi-a-GCST90016947	TRUE	reported	igd
family	3	62035586	-0.059133	0.0122235	1.79349e-06	14306	ebi-a-GCST90016947	rs17065783	A	G		|| id:ebi-a-GCST90016947	TRUE	reported	igd
family	3	189854046	-0.0581896	0.0121147	2.19498e-06	14306	ebi-a-GCST90016947	rs3111851	G	C		|| id:ebi-a-GCST90016947	TRUE	reported	igd
family	4	149825977	-0.0527939	0.0117499	9.59798e-06	14306	ebi-a-GCST90016947	rs864093	A	C		|| id:ebi-a-GCST90016947	TRUE	reported	igd
family	7	69251692	0.0718149	0.0150724	2.44478e-06	14306	ebi-a-GCST90016947	rs6953849	A	G		|| id:ebi-a-GCST90016947	TRUE	reported	igd
family	9	138076081	0.055316	0.012085	4.31062e-06	14306	ebi-a-GCST90016947	rs10858364	G	T		|| id:ebi-a-GCST90016947	TRUE	reported	igd
family	9	2233969	-0.0737324	0.014259	1.32425e-07	14306	ebi-a-GCST90016947	rs10119172	C	G		|| id:ebi-a-GCST90016947	TRUE	reported	igd
family	10	71571863	0.052368	0.0118814	8.70362e-06	14306	ebi-a-GCST90016947	rs10762312	A	G		|| id:ebi-a-GCST90016947	TRUE	reported	igd
family	13	23531802	-0.103842	0.0237355	8.04896e-06	14306	ebi-a-GCST90016947	rs7330827	T	C		|| id:ebi-a-GCST90016947	TRUE	reported	igd
family	14	63386516	-0.0485289	0.0109284	8.9454e-06	14306	ebi-a-GCST90016947	rs1980561	A	G		|| id:ebi-a-GCST90016947	TRUE	reported	igd
family	17	63750903	-0.0473576	0.010602	7.90988e-06	14306	ebi-a-GCST90016947	rs35233670	T	C		|| id:ebi-a-GCST90016947	TRUE	reported	igd
family	1	111161677	0.083936	0.0167936	5.4968e-07	14306	ebi-a-GCST90016948	rs3860225	A	G		|| id:ebi-a-GCST90016948	TRUE	reported	igd
family	1	210681370	-0.0751986	0.0147265	5.5423e-07	14306	ebi-a-GCST90016948	rs12118202	T	C		|| id:ebi-a-GCST90016948	TRUE	reported	igd
family	1	99470269	0.0589878	0.0132268	8.9747e-06	14306	ebi-a-GCST90016948	rs12057990	C	T		|| id:ebi-a-GCST90016948	TRUE	reported	igd
family	2	118910912	-0.0604992	0.0118027	3.02315e-07	14306	ebi-a-GCST90016948	rs4493272	T	C		|| id:ebi-a-GCST90016948	TRUE	reported	igd
family	3	4864877	-0.0679529	0.0145407	2.77192e-06	14306	ebi-a-GCST90016948	rs4685827	T	C		|| id:ebi-a-GCST90016948	TRUE	reported	igd
family	3	32408916	0.0554249	0.0123265	8.43587e-06	14306	ebi-a-GCST90016948	rs2278540	G	A		|| id:ebi-a-GCST90016948	TRUE	reported	igd
family	3	170126707	0.084515	0.0179163	2.08027e-06	14306	ebi-a-GCST90016948	rs148376875	T	G		|| id:ebi-a-GCST90016948	TRUE	reported	igd
family	3	71801830	-0.0539768	0.0119687	7.39486e-06	14306	ebi-a-GCST90016948	rs13069367	A	C		|| id:ebi-a-GCST90016948	TRUE	reported	igd
family	5	180283881	-0.0805894	0.0178291	7.40321e-06	14306	ebi-a-GCST90016948	rs34660375	A	G		|| id:ebi-a-GCST90016948	TRUE	reported	igd
family	8	23714609	-0.0564199	0.0124655	8.60578e-06	14306	ebi-a-GCST90016948	rs3758087	C	T		|| id:ebi-a-GCST90016948	TRUE	reported	igd
family	11	119712522	-0.1567	0.0347882	5.60144e-06	14306	ebi-a-GCST90016948	rs34071565	T	A		|| id:ebi-a-GCST90016948	TRUE	reported	igd
family	12	21404832	-0.0601448	0.0135454	7.59451e-06	14306	ebi-a-GCST90016948	rs7975087	C	A		|| id:ebi-a-GCST90016948	TRUE	reported	igd
family	13	105075823	0.0592681	0.0127329	2.58988e-06	14306	ebi-a-GCST90016948	rs9586501	G	A		|| id:ebi-a-GCST90016948	TRUE	reported	igd
family	14	78643095	0.0701212	0.0158326	8.60815e-06	14306	ebi-a-GCST90016948	rs10131942	C	G		|| id:ebi-a-GCST90016948	TRUE	reported	igd
family	14	33706908	0.229046	0.0483124	9.29929e-07	14306	ebi-a-GCST90016948	rs912860	A	G		|| id:ebi-a-GCST90016948	TRUE	reported	igd
family	18	63018983	-0.0914807	0.0173611	1.06324e-07	14306	ebi-a-GCST90016948	rs9958960	G	A		|| id:ebi-a-GCST90016948	TRUE	reported	igd
family	19	17460999	0.0740876	0.0161926	5.56583e-06	14306	ebi-a-GCST90016948	rs7252711	G	A		|| id:ebi-a-GCST90016948	TRUE	reported	igd
family	20	9771109	-0.0569105	0.0117486	1.30377e-06	14306	ebi-a-GCST90016948	rs2206482	T	G		|| id:ebi-a-GCST90016948	TRUE	reported	igd
family	1	78619512	0.111984	0.0251088	9.94672e-06	14306	ebi-a-GCST90016949	rs6679026	T	C		|| id:ebi-a-GCST90016949	TRUE	reported	igd
family	1	92206218	0.0816858	0.0180791	7.3492e-06	14306	ebi-a-GCST90016949	rs72714493	A	G		|| id:ebi-a-GCST90016949	TRUE	reported	igd
family	2	169033340	0.136049	0.0285767	1.48988e-06	14306	ebi-a-GCST90016949	rs76784716	A	G		|| id:ebi-a-GCST90016949	TRUE	reported	igd
family	2	225633812	0.0971389	0.0200064	1.71479e-06	14306	ebi-a-GCST90016949	rs3754624	C	T		|| id:ebi-a-GCST90016949	TRUE	reported	igd
family	3	13726736	-0.0842444	0.0163583	2.53122e-07	14306	ebi-a-GCST90016949	rs9813022	A	G		|| id:ebi-a-GCST90016949	TRUE	reported	igd
family	3	84471266	-0.0911851	0.0196395	2.86682e-06	14306	ebi-a-GCST90016949	rs55876211	C	T		|| id:ebi-a-GCST90016949	TRUE	reported	igd
family	4	134192918	-0.0911896	0.0204907	6.67298e-06	14306	ebi-a-GCST90016949	rs74354280	C	T		|| id:ebi-a-GCST90016949	TRUE	reported	igd
family	5	27945645	0.0999312	0.0218634	4.70392e-06	14306	ebi-a-GCST90016949	rs1549633	A	C		|| id:ebi-a-GCST90016949	TRUE	reported	igd
family	5	119372737	-0.11354	0.0250863	5.84454e-06	14306	ebi-a-GCST90016949	rs1035406	G	A		|| id:ebi-a-GCST90016949	TRUE	reported	igd
family	6	89268715	-0.0999238	0.0227326	9.63696e-06	14306	ebi-a-GCST90016949	rs1923415	A	G		|| id:ebi-a-GCST90016949	TRUE	reported	igd
family	8	131958403	0.117366	0.0261324	5.34749e-06	14306	ebi-a-GCST90016949	rs7001029	C	T		|| id:ebi-a-GCST90016949	TRUE	reported	igd
family	10	113419797	0.0743184	0.0158724	2.67147e-06	14306	ebi-a-GCST90016949	rs11591293	G	T		|| id:ebi-a-GCST90016949	TRUE	reported	igd
family	10	2670553	0.107529	0.0235725	3.12018e-06	14306	ebi-a-GCST90016949	rs4278423	T	C		|| id:ebi-a-GCST90016949	TRUE	reported	igd
family	12	73139398	0.164808	0.0360647	7.22587e-06	14306	ebi-a-GCST90016949	rs61933850	G	A		|| id:ebi-a-GCST90016949	TRUE	reported	igd
family	16	88554243	-0.0701719	0.0158061	9.17339e-06	14306	ebi-a-GCST90016949	rs13336560	C	T		|| id:ebi-a-GCST90016949	TRUE	reported	igd
family	19	28641647	0.0730952	0.0163491	7.62588e-06	14306	ebi-a-GCST90016949	rs12977163	G	C		|| id:ebi-a-GCST90016949	TRUE	reported	igd
family	22	27173098	0.0734321	0.0160521	7.00519e-06	14306	ebi-a-GCST90016949	rs4822789	G	C		|| id:ebi-a-GCST90016949	TRUE	reported	igd
family	1	19790706	-0.0549688	0.0110534	6.57552e-07	14306	ebi-a-GCST90016950	rs67705352	T	G		|| id:ebi-a-GCST90016950	TRUE	reported	igd
family	2	174257127	0.0696747	0.0157103	9.31515e-06	14306	ebi-a-GCST90016950	rs6744030	C	T		|| id:ebi-a-GCST90016950	TRUE	reported	igd
family	4	187842232	0.0570355	0.011887	1.447e-06	14306	ebi-a-GCST90016950	rs6837275	A	G		|| id:ebi-a-GCST90016950	TRUE	reported	igd
family	6	100244667	-0.0636841	0.0143416	8.79063e-06	14306	ebi-a-GCST90016950	rs9389714	C	T		|| id:ebi-a-GCST90016950	TRUE	reported	igd
family	7	135778919	0.0635814	0.0137451	3.63471e-06	14306	ebi-a-GCST90016950	rs67281112	G	C		|| id:ebi-a-GCST90016950	TRUE	reported	igd
family	8	99188924	0.0549203	0.0121904	6.08611e-06	14306	ebi-a-GCST90016950	rs2447496	A	G		|| id:ebi-a-GCST90016950	TRUE	reported	igd
family	8	144441740	-0.0850181	0.0191539	7.09823e-06	14306	ebi-a-GCST90016950	rs35909684	A	C		|| id:ebi-a-GCST90016950	TRUE	reported	igd
family	9	14158854	0.0504257	0.0107399	2.76427e-06	14306	ebi-a-GCST90016950	rs62532512	A	C		|| id:ebi-a-GCST90016950	TRUE	reported	igd
family	9	86052655	-0.0883756	0.0197506	6.50759e-06	14306	ebi-a-GCST90016950	rs10217435	C	T		|| id:ebi-a-GCST90016950	TRUE	reported	igd
family	11	95304834	-0.105589	0.0206213	5.64378e-07	14306	ebi-a-GCST90016950	rs1939881	G	A		|| id:ebi-a-GCST90016950	TRUE	reported	igd
family	11	17589129	-0.0534763	0.0122666	7.50412e-06	14306	ebi-a-GCST90016950	rs10832801	A	C		|| id:ebi-a-GCST90016950	TRUE	reported	igd
family	13	22867356	-0.141478	0.0315848	3.99448e-06	14306	ebi-a-GCST90016950	rs9578457	G	A		|| id:ebi-a-GCST90016950	TRUE	reported	igd
family	13	38044689	0.0821173	0.0159596	1.91801e-07	14306	ebi-a-GCST90016950	rs9603208	G	T		|| id:ebi-a-GCST90016950	TRUE	reported	igd
family	14	21548634	-0.156209	0.0336482	2.84695e-06	14306	ebi-a-GCST90016950	rs77885767	C	T		|| id:ebi-a-GCST90016950	TRUE	reported	igd
family	14	90270821	0.137747	0.0295688	3.61377e-06	14306	ebi-a-GCST90016950	rs74474130	T	G		|| id:ebi-a-GCST90016950	TRUE	reported	igd
family	15	71658642	-0.0526393	0.0108555	1.34831e-06	14306	ebi-a-GCST90016950	rs4264350	T	C		|| id:ebi-a-GCST90016950	TRUE	reported	igd
family	16	85396629	-0.0481514	0.0110006	7.06415e-06	14306	ebi-a-GCST90016950	rs4783173	G	C		|| id:ebi-a-GCST90016950	TRUE	reported	igd
family	18	10338470	-0.0618674	0.0134882	5.80711e-06	14306	ebi-a-GCST90016950	rs7242694	C	T		|| id:ebi-a-GCST90016950	TRUE	reported	igd
family	18	4069710	0.0570915	0.0125048	6.12238e-06	14306	ebi-a-GCST90016950	rs59663348	G	A		|| id:ebi-a-GCST90016950	TRUE	reported	igd
family	21	32496710	0.0711137	0.0156966	4.31102e-06	14306	ebi-a-GCST90016950	rs2833282	G	A		|| id:ebi-a-GCST90016950	TRUE	reported	igd
family	21	28515912	-0.0656005	0.0144903	7.19515e-06	14306	ebi-a-GCST90016950	rs36021379	A	G		|| id:ebi-a-GCST90016950	TRUE	reported	igd
family	1	24473669	0.0901053	0.0203104	9.60484e-06	14306	ebi-a-GCST90016951	rs76724913	T	G		|| id:ebi-a-GCST90016951	TRUE	reported	igd
family	1	147744468	-0.0927607	0.0210123	8.6902e-06	14306	ebi-a-GCST90016951	rs3009418	A	C		|| id:ebi-a-GCST90016951	TRUE	reported	igd
family	1	107661606	0.108708	0.0238006	4.22435e-06	14306	ebi-a-GCST90016951	rs1612733	T	C		|| id:ebi-a-GCST90016951	TRUE	reported	igd
family	1	61425267	0.0848534	0.0172114	7.29625e-07	14306	ebi-a-GCST90016951	rs17376049	T	C		|| id:ebi-a-GCST90016951	TRUE	reported	igd
family	2	218216801	-0.169146	0.0355009	1.14464e-06	14306	ebi-a-GCST90016951	rs2113833	C	T		|| id:ebi-a-GCST90016951	TRUE	reported	igd
family	2	29829167	0.053336	0.0120209	8.52158e-06	14306	ebi-a-GCST90016951	rs10166469	C	T		|| id:ebi-a-GCST90016951	TRUE	reported	igd
family	8	4555684	0.0490539	0.0109865	8.60855e-06	14306	ebi-a-GCST90016951	rs1158100	G	A		|| id:ebi-a-GCST90016951	TRUE	reported	igd
family	8	69732887	-0.0534595	0.011677	5.35229e-06	14306	ebi-a-GCST90016951	rs10093275	T	C		|| id:ebi-a-GCST90016951	TRUE	reported	igd
family	9	2801371	-0.199327	0.0410444	1.66414e-06	14306	ebi-a-GCST90016951	rs56199908	T	C		|| id:ebi-a-GCST90016951	TRUE	reported	igd
family	11	116485496	0.0706431	0.016046	9.29351e-06	14306	ebi-a-GCST90016951	rs499272	G	C		|| id:ebi-a-GCST90016951	TRUE	reported	igd
family	12	47384118	0.13822	0.0266152	1.44338e-07	14306	ebi-a-GCST90016951	rs55793120	T	C		|| id:ebi-a-GCST90016951	TRUE	reported	igd
family	20	58278102	-0.0480152	0.0106011	6.04463e-06	14306	ebi-a-GCST90016951	rs2426816	T	A		|| id:ebi-a-GCST90016951	TRUE	reported	igd
family	1	240441766	-0.0993013	0.0224788	7.93341e-06	14306	ebi-a-GCST90016952	rs77968078	G	A		|| id:ebi-a-GCST90016952	TRUE	reported	igd
family	3	94153993	0.150606	0.0334079	3.08937e-06	14306	ebi-a-GCST90016952	rs76717940	T	A		|| id:ebi-a-GCST90016952	TRUE	reported	igd
family	3	132058723	-0.0619209	0.0135744	6.93793e-06	14306	ebi-a-GCST90016952	rs6806351	T	C		|| id:ebi-a-GCST90016952	TRUE	reported	igd
family	4	53657577	-0.0934027	0.0190343	3.72495e-06	14306	ebi-a-GCST90016952	rs10028567	C	T		|| id:ebi-a-GCST90016952	TRUE	reported	igd
family	4	37452858	-0.088021	0.019876	7.88352e-06	14306	ebi-a-GCST90016952	rs57646748	G	A		|| id:ebi-a-GCST90016952	TRUE	reported	igd
family	5	169689604	0.0826855	0.0172536	1.32559e-06	14306	ebi-a-GCST90016952	rs395407	C	G		|| id:ebi-a-GCST90016952	TRUE	reported	igd
family	7	46778653	-0.0642449	0.0142702	7.41515e-06	14306	ebi-a-GCST90016952	rs957755	T	G		|| id:ebi-a-GCST90016952	TRUE	reported	igd
family	8	10143164	0.0639298	0.0126525	3.72237e-07	14306	ebi-a-GCST90016952	rs2952251	G	A		|| id:ebi-a-GCST90016952	TRUE	reported	igd
family	10	28588269	0.0959639	0.021545	6.32732e-06	14306	ebi-a-GCST90016952	rs7916711	A	G		|| id:ebi-a-GCST90016952	TRUE	reported	igd
family	12	120729505	0.107008	0.0236973	5.33814e-06	14306	ebi-a-GCST90016952	rs16950051	A	G		|| id:ebi-a-GCST90016952	TRUE	reported	igd
family	12	100584014	-0.130554	0.0225943	1.40136e-08	14306	ebi-a-GCST90016952	rs11110281	T	C		|| id:ebi-a-GCST90016952	TRUE	reported	igd
family	14	97526750	-0.0842751	0.0184509	4.25667e-06	14306	ebi-a-GCST90016952	rs2370083	G	T		|| id:ebi-a-GCST90016952	TRUE	reported	igd
family	15	41663393	0.0927983	0.0192021	1.82163e-06	14306	ebi-a-GCST90016952	rs72739637	A	G		|| id:ebi-a-GCST90016952	TRUE	reported	igd
family	16	73391982	-0.0801931	0.0178576	8.70583e-06	14306	ebi-a-GCST90016952	rs6563952	C	G		|| id:ebi-a-GCST90016952	TRUE	reported	igd
family	16	991253	0.0609349	0.0129703	2.63846e-06	14306	ebi-a-GCST90016952	rs35344081	G	A		|| id:ebi-a-GCST90016952	TRUE	reported	igd
family	17	80576624	-0.0693015	0.0154096	4.91802e-06	14306	ebi-a-GCST90016952	rs9903102	C	A		|| id:ebi-a-GCST90016952	TRUE	reported	igd
family	17	61298020	-0.0544035	0.0111271	8.91887e-07	14306	ebi-a-GCST90016952	rs4968759	A	G		|| id:ebi-a-GCST90016952	TRUE	reported	igd
family	1	50088819	-0.0621452	0.0119266	1.28493e-07	14306	ebi-a-GCST90016956	rs12741784	C	T		|| id:ebi-a-GCST90016956	TRUE	reported	igd
family	1	244391618	-0.0534397	0.0118254	8.67981e-06	14306	ebi-a-GCST90016956	rs6692542	G	A		|| id:ebi-a-GCST90016956	TRUE	reported	igd
family	4	46366067	0.0514024	0.0112125	4.50671e-06	14306	ebi-a-GCST90016956	rs1442060	A	G		|| id:ebi-a-GCST90016956	TRUE	reported	igd
family	4	23317124	0.0526752	0.0114886	4.63554e-06	14306	ebi-a-GCST90016956	rs2175069	G	A		|| id:ebi-a-GCST90016956	TRUE	reported	igd
family	5	132646303	0.208096	0.0453999	4.52856e-06	14306	ebi-a-GCST90016956	rs12186441	G	A		|| id:ebi-a-GCST90016956	TRUE	reported	igd
family	5	38348199	-0.083617	0.0187159	7.88515e-06	14306	ebi-a-GCST90016956	rs2561116	T	G		|| id:ebi-a-GCST90016956	TRUE	reported	igd
family	6	75534152	-0.0638696	0.0141765	5.47621e-06	14306	ebi-a-GCST90016956	rs6909981	C	T		|| id:ebi-a-GCST90016956	TRUE	reported	igd
family	6	139188534	0.202367	0.0464388	6.74544e-06	14306	ebi-a-GCST90016956	rs61264131	A	C		|| id:ebi-a-GCST90016956	TRUE	reported	igd
family	6	92380922	-0.0509102	0.0113253	8.48887e-06	14306	ebi-a-GCST90016956	rs9345168	A	C		|| id:ebi-a-GCST90016956	TRUE	reported	igd
family	7	21637810	0.055301	0.0117654	2.57365e-06	14306	ebi-a-GCST90016956	rs12668619	A	G		|| id:ebi-a-GCST90016956	TRUE	reported	igd
family	8	138319508	-0.050942	0.0114921	7.45006e-06	14306	ebi-a-GCST90016956	rs4263802	A	G		|| id:ebi-a-GCST90016956	TRUE	reported	igd
family	8	41231597	0.0520689	0.0115656	7.34903e-06	14306	ebi-a-GCST90016956	rs1447205	C	G		|| id:ebi-a-GCST90016956	TRUE	reported	igd
family	13	101617913	-0.0703773	0.0156855	7.19234e-06	14306	ebi-a-GCST90016956	rs75768969	C	G		|| id:ebi-a-GCST90016956	TRUE	reported	igd
family	13	61597625	-0.253809	0.0539169	6.19028e-06	14306	ebi-a-GCST90016956	rs114889439	A	G		|| id:ebi-a-GCST90016956	TRUE	reported	igd
family	13	38326692	0.100666	0.0207016	1.57688e-06	14306	ebi-a-GCST90016956	rs79535861	A	C		|| id:ebi-a-GCST90016956	TRUE	reported	igd
family	13	78785141	-0.0904972	0.0200428	5.26926e-06	14306	ebi-a-GCST90016956	rs2585520	G	T		|| id:ebi-a-GCST90016956	TRUE	reported	igd
family	14	102897930	-0.0867108	0.0180573	1.72926e-06	14306	ebi-a-GCST90016956	rs111810795	C	T		|| id:ebi-a-GCST90016956	TRUE	reported	igd
family	15	78546996	0.0554965	0.0119467	3.73474e-06	14306	ebi-a-GCST90016956	rs4461038	G	A		|| id:ebi-a-GCST90016956	TRUE	reported	igd
family	18	462180	0.0587799	0.0128297	4.49345e-06	14306	ebi-a-GCST90016956	rs4797169	T	C		|| id:ebi-a-GCST90016956	TRUE	reported	igd
family	18	30208691	0.0818934	0.018245	9.25273e-06	14306	ebi-a-GCST90016956	rs1693340	T	C		|| id:ebi-a-GCST90016956	TRUE	reported	igd
family	21	35576123	0.0503337	0.0113763	9.2538e-06	14306	ebi-a-GCST90016956	rs11700976	C	A		|| id:ebi-a-GCST90016956	TRUE	reported	igd
family	1	105422565	-0.0655301	0.014223	4.13847e-06	14306	ebi-a-GCST90016957	rs11184341	C	G		|| id:ebi-a-GCST90016957	TRUE	reported	igd
family	1	41074472	-0.0758811	0.0167762	6.63025e-06	14306	ebi-a-GCST90016957	rs61779207	G	A		|| id:ebi-a-GCST90016957	TRUE	reported	igd
family	4	95027272	0.0749798	0.0150177	6.73085e-07	14306	ebi-a-GCST90016957	rs11729256	T	C		|| id:ebi-a-GCST90016957	TRUE	reported	igd
family	4	100544188	0.112124	0.0236422	1.64611e-06	14306	ebi-a-GCST90016957	rs74542928	T	C		|| id:ebi-a-GCST90016957	TRUE	reported	igd
family	6	56341481	-0.0704354	0.0147128	2.51287e-06	14306	ebi-a-GCST90016957	rs9349825	A	G		|| id:ebi-a-GCST90016957	TRUE	reported	igd
family	10	5064327	-0.0687992	0.0147694	2.75442e-06	14306	ebi-a-GCST90016957	rs4242783	A	G		|| id:ebi-a-GCST90016957	TRUE	reported	igd
family	11	130280667	-0.0648691	0.0135928	1.1293e-06	14306	ebi-a-GCST90016957	rs4936098	G	A		|| id:ebi-a-GCST90016957	TRUE	reported	igd
family	12	130309670	0.0907065	0.0196746	3.7313e-06	14306	ebi-a-GCST90016957	rs111862613	T	C		|| id:ebi-a-GCST90016957	TRUE	reported	igd
family	15	97570657	0.0619104	0.0130946	2.15139e-06	14306	ebi-a-GCST90016957	rs12908520	G	A		|| id:ebi-a-GCST90016957	TRUE	reported	igd
family	16	81063149	-0.0745516	0.0156195	2.69942e-06	14306	ebi-a-GCST90016957	rs2602429	T	C		|| id:ebi-a-GCST90016957	TRUE	reported	igd
family	18	49473635	0.204683	0.0431572	2.91823e-06	14306	ebi-a-GCST90016957	rs117107102	A	G		|| id:ebi-a-GCST90016957	TRUE	reported	igd
family	20	31867840	-0.0631526	0.0143767	9.5812e-06	14306	ebi-a-GCST90016957	rs941682	G	A		|| id:ebi-a-GCST90016957	TRUE	reported	igd
family	2	60484909	-0.197786	0.0410495	5.97008e-07	14306	ebi-a-GCST90016958	rs6545794	A	G		|| id:ebi-a-GCST90016958	TRUE	reported	igd
family	2	2649472	-0.123489	0.0266695	3.23802e-06	14306	ebi-a-GCST90016958	rs67832247	C	T		|| id:ebi-a-GCST90016958	TRUE	reported	igd
family	2	31211657	0.145501	0.0300007	3.07921e-06	14306	ebi-a-GCST90016958	rs61702987	T	C		|| id:ebi-a-GCST90016958	TRUE	reported	igd
family	3	9968555	-0.134158	0.0301427	8.19426e-06	14306	ebi-a-GCST90016958	rs7627405	C	T		|| id:ebi-a-GCST90016958	TRUE	reported	igd
family	5	94692439	-0.126643	0.0257111	1.02501e-06	14306	ebi-a-GCST90016958	rs2546105	T	A		|| id:ebi-a-GCST90016958	TRUE	reported	igd
family	7	146808977	0.127099	0.025656	7.4929e-07	14306	ebi-a-GCST90016958	rs11764871	G	T		|| id:ebi-a-GCST90016958	TRUE	reported	igd
family	7	57589803	-0.124197	0.0257026	1.56603e-06	14306	ebi-a-GCST90016958	rs2944282	T	C		|| id:ebi-a-GCST90016958	TRUE	reported	igd
family	9	94128796	0.164855	0.0375128	9.60086e-06	14306	ebi-a-GCST90016958	rs7860510	G	C		|| id:ebi-a-GCST90016958	TRUE	reported	igd
family	9	111086170	-0.246101	0.0483077	2.69855e-07	14306	ebi-a-GCST90016958	rs62570196	C	T		|| id:ebi-a-GCST90016958	TRUE	reported	igd
family	10	95286954	0.148942	0.0318366	2.83374e-06	14306	ebi-a-GCST90016958	rs7077363	G	A		|| id:ebi-a-GCST90016958	TRUE	reported	igd
family	11	9316730	-0.152918	0.0288525	1.53784e-07	14306	ebi-a-GCST90016958	rs4396289	C	T		|| id:ebi-a-GCST90016958	TRUE	reported	igd
family	12	102525047	0.101088	0.0225594	6.40088e-06	14306	ebi-a-GCST90016958	rs7314815	G	A		|| id:ebi-a-GCST90016958	TRUE	reported	igd
family	12	131103256	-0.186945	0.0418412	6.24827e-06	14306	ebi-a-GCST90016958	rs34962571	A	C		|| id:ebi-a-GCST90016958	TRUE	reported	igd
family	19	711637	-0.160034	0.0349472	4.08037e-06	14306	ebi-a-GCST90016958	rs11671100	A	C		|| id:ebi-a-GCST90016958	TRUE	reported	igd
genus	3	101352439	-0.0969809	0.021925	9.82969e-06	14306	ebi-a-GCST90016959	rs71315246	A	G		|| id:ebi-a-GCST90016959	TRUE	reported	igd
genus	6	67207371	0.126596	0.0268461	4.48528e-06	14306	ebi-a-GCST90016959	rs34583783	G	T		|| id:ebi-a-GCST90016959	TRUE	reported	igd
genus	6	169224781	0.0749687	0.0167368	7.94273e-06	14306	ebi-a-GCST90016959	rs4073240	G	A		|| id:ebi-a-GCST90016959	TRUE	reported	igd
genus	6	133007480	0.232634	0.0512044	6.33826e-06	14306	ebi-a-GCST90016959	rs35011108	A	G		|| id:ebi-a-GCST90016959	TRUE	reported	igd
genus	10	4782841	0.0985224	0.0214182	4.49645e-06	14306	ebi-a-GCST90016959	rs4146653	G	A		|| id:ebi-a-GCST90016959	TRUE	reported	igd
genus	10	121356829	0.094316	0.0213513	9.62299e-06	14306	ebi-a-GCST90016959	rs10787984	G	C		|| id:ebi-a-GCST90016959	TRUE	reported	igd
genus	10	127532121	-0.18776	0.0401636	5.91984e-06	14306	ebi-a-GCST90016959	rs7915461	C	T		|| id:ebi-a-GCST90016959	TRUE	reported	igd
genus	15	99492313	-0.0746684	0.0164822	6.27004e-06	14306	ebi-a-GCST90016959	rs2715439	T	C		|| id:ebi-a-GCST90016959	TRUE	reported	igd
genus	1	69444163	-0.0953084	0.0210752	5.2342e-06	14306	ebi-a-GCST90016960	rs6664405	T	C		|| id:ebi-a-GCST90016960	TRUE	reported	igd
genus	1	201061818	-0.0922959	0.0192121	1.39878e-06	14306	ebi-a-GCST90016960	rs2147798	G	C		|| id:ebi-a-GCST90016960	TRUE	reported	igd
genus	3	105355971	-0.0699243	0.0158036	9.60506e-06	14306	ebi-a-GCST90016960	rs55719207	G	A		|| id:ebi-a-GCST90016960	TRUE	reported	igd
genus	4	171281359	0.083381	0.0168901	9.769e-07	14306	ebi-a-GCST90016960	rs7680684	T	C		|| id:ebi-a-GCST90016960	TRUE	reported	igd
genus	5	94059857	-0.11324	0.0232586	1.57358e-06	14306	ebi-a-GCST90016960	rs80078995	A	T		|| id:ebi-a-GCST90016960	TRUE	reported	igd
genus	5	31991834	-0.104884	0.0234695	4.41255e-06	14306	ebi-a-GCST90016960	rs12522517	A	T		|| id:ebi-a-GCST90016960	TRUE	reported	igd
genus	6	123909083	-0.0734512	0.0155789	2.54419e-06	14306	ebi-a-GCST90016960	rs9490822	C	T		|| id:ebi-a-GCST90016960	TRUE	reported	igd
genus	7	48844151	0.143237	0.0311654	4.8136e-06	14306	ebi-a-GCST90016960	rs13231526	C	A		|| id:ebi-a-GCST90016960	TRUE	reported	igd
genus	10	135204950	-0.112758	0.0255994	6.35887e-06	14306	ebi-a-GCST90016960	rs1046175	G	C		|| id:ebi-a-GCST90016960	TRUE	reported	igd
genus	11	98386085	-0.102524	0.0234834	9.74473e-06	14306	ebi-a-GCST90016960	rs11604400	C	T		|| id:ebi-a-GCST90016960	TRUE	reported	igd
genus	17	48864179	-0.0749219	0.016833	8.21675e-06	14306	ebi-a-GCST90016960	rs9915817	C	T		|| id:ebi-a-GCST90016960	TRUE	reported	igd
genus	18	75009770	-0.119225	0.0251081	2.04593e-06	14306	ebi-a-GCST90016960	rs2717140	C	T		|| id:ebi-a-GCST90016960	TRUE	reported	igd
genus	1	247145690	-0.10309	0.0212861	1.48659e-06	14306	ebi-a-GCST90016965	rs4506496	A	G		|| id:ebi-a-GCST90016965	TRUE	reported	igd
genus	2	76698142	0.0903417	0.0200239	7.24169e-06	14306	ebi-a-GCST90016965	rs17012738	T	G		|| id:ebi-a-GCST90016965	TRUE	reported	igd
genus	2	191139151	0.182586	0.0357284	3.74731e-07	14306	ebi-a-GCST90016965	rs79598899	C	T		|| id:ebi-a-GCST90016965	TRUE	reported	igd
genus	2	3838940	0.0923834	0.0202157	5.53847e-06	14306	ebi-a-GCST90016965	rs1563175	A	C		|| id:ebi-a-GCST90016965	TRUE	reported	igd
genus	3	129686434	0.10076	0.0202902	6.83109e-07	14306	ebi-a-GCST90016965	rs712981	A	C		|| id:ebi-a-GCST90016965	TRUE	reported	igd
genus	9	104339812	-0.1364	0.0302372	8.04304e-06	14306	ebi-a-GCST90016965	rs9299345	T	C		|| id:ebi-a-GCST90016965	TRUE	reported	igd
genus	10	125294406	-0.193107	0.0411187	1.56819e-06	14306	ebi-a-GCST90016965	rs17105491	G	C		|| id:ebi-a-GCST90016965	TRUE	reported	igd
genus	11	1051715	0.0953524	0.02006	2.23496e-06	14306	ebi-a-GCST90016965	rs10794359	C	T		|| id:ebi-a-GCST90016965	TRUE	reported	igd
genus	12	67167461	0.146775	0.0326594	9.81206e-06	14306	ebi-a-GCST90016965	rs4244069	A	G		|| id:ebi-a-GCST90016965	TRUE	reported	igd
genus	12	117811409	-0.113003	0.02204	2.6404e-07	14306	ebi-a-GCST90016965	rs816292	T	C		|| id:ebi-a-GCST90016965	TRUE	reported	igd
genus	14	30991358	-0.126337	0.0268919	2.86029e-06	14306	ebi-a-GCST90016965	rs17096874	C	T		|| id:ebi-a-GCST90016965	TRUE	reported	igd
genus	17	6450532	0.132603	0.0289802	6.55843e-06	14306	ebi-a-GCST90016965	rs356049	G	A		|| id:ebi-a-GCST90016965	TRUE	reported	igd
genus	1	67595108	0.197389	0.0458642	7.72058e-06	14306	ebi-a-GCST90016966	rs13376554	A	T		|| id:ebi-a-GCST90016966	TRUE	reported	igd
genus	2	228018671	0.0512653	0.0109555	2.91092e-06	14306	ebi-a-GCST90016966	rs2396460	C	T		|| id:ebi-a-GCST90016966	TRUE	reported	igd
genus	2	142774333	0.088573	0.0185548	1.44907e-06	14306	ebi-a-GCST90016966	rs62157625	T	C		|| id:ebi-a-GCST90016966	TRUE	reported	igd
genus	2	39351569	-0.0877497	0.0189408	3.32216e-06	14306	ebi-a-GCST90016966	rs6726833	C	A		|| id:ebi-a-GCST90016966	TRUE	reported	igd
genus	3	171100102	0.0515687	0.0112199	4.68058e-06	14306	ebi-a-GCST90016966	rs2014785	T	C		|| id:ebi-a-GCST90016966	TRUE	reported	igd
genus	4	169690814	0.0508482	0.0109075	3.1958e-06	14306	ebi-a-GCST90016966	rs6854026	C	T		|| id:ebi-a-GCST90016966	TRUE	reported	igd
genus	8	128397494	0.0621085	0.0136614	5.84198e-06	14306	ebi-a-GCST90016966	rs7823228	C	G		|| id:ebi-a-GCST90016966	TRUE	reported	igd
genus	9	1582701	0.0500065	0.0112001	6.74481e-06	14306	ebi-a-GCST90016966	rs6474958	G	A		|| id:ebi-a-GCST90016966	TRUE	reported	igd
genus	9	13525082	-0.110013	0.0236302	2.74764e-06	14306	ebi-a-GCST90016966	rs3900776	G	A		|| id:ebi-a-GCST90016966	TRUE	reported	igd
genus	10	117383184	0.053089	0.0110983	2.04052e-06	14306	ebi-a-GCST90016966	rs2804244	G	A		|| id:ebi-a-GCST90016966	TRUE	reported	igd
genus	11	105615253	0.0835752	0.0192017	7.93542e-06	14306	ebi-a-GCST90016966	rs10502061	A	G		|| id:ebi-a-GCST90016966	TRUE	reported	igd
genus	16	77574020	-0.0750642	0.0150723	5.35476e-07	14306	ebi-a-GCST90016966	rs7193624	T	C		|| id:ebi-a-GCST90016966	TRUE	reported	igd
genus	17	2850737	-0.0539901	0.0116575	4.42059e-06	14306	ebi-a-GCST90016966	rs60983350	G	A		|| id:ebi-a-GCST90016966	TRUE	reported	igd
genus	19	1497547	-0.137429	0.0305304	5.33384e-06	14306	ebi-a-GCST90016966	rs78735375	A	C		|| id:ebi-a-GCST90016966	TRUE	reported	igd
genus	21	25873624	0.0644965	0.0136702	1.9777e-06	14306	ebi-a-GCST90016966	rs62215703	G	A		|| id:ebi-a-GCST90016966	TRUE	reported	igd
genus	1	235580646	0.186779	0.0389112	1.70565e-06	14306	ebi-a-GCST90016975	rs7412979	C	G		|| id:ebi-a-GCST90016975	TRUE	reported	igd
genus	3	54288503	0.17471	0.0389333	8.18634e-06	14306	ebi-a-GCST90016975	rs4928024	G	A		|| id:ebi-a-GCST90016975	TRUE	reported	igd
genus	5	128976021	0.140987	0.0309117	5.51201e-06	14306	ebi-a-GCST90016975	rs17163238	G	A		|| id:ebi-a-GCST90016975	TRUE	reported	igd
genus	6	21960091	-0.119846	0.0253367	3.10656e-06	14306	ebi-a-GCST90016975	rs7763512	A	G		|| id:ebi-a-GCST90016975	TRUE	reported	igd
genus	6	53939724	-0.117973	0.0259861	5.54958e-06	14306	ebi-a-GCST90016975	rs9349693	G	A		|| id:ebi-a-GCST90016975	TRUE	reported	igd
genus	6	148403405	0.118065	0.0261271	7.92319e-06	14306	ebi-a-GCST90016975	rs1007475	G	T		|| id:ebi-a-GCST90016975	TRUE	reported	igd
genus	6	111780705	0.11923	0.0239975	7.69113e-07	14306	ebi-a-GCST90016975	rs7752361	G	A		|| id:ebi-a-GCST90016975	TRUE	reported	igd
genus	7	150596929	0.154775	0.0321539	2.20232e-06	14306	ebi-a-GCST90016975	rs11761679	T	C		|| id:ebi-a-GCST90016975	TRUE	reported	igd
genus	9	119693164	-0.133784	0.0299444	8.85911e-06	14306	ebi-a-GCST90016975	rs16934069	T	C		|| id:ebi-a-GCST90016975	TRUE	reported	igd
genus	10	22587900	0.205013	0.0457138	6.85536e-06	14306	ebi-a-GCST90016975	rs142855850	A	G		|| id:ebi-a-GCST90016975	TRUE	reported	igd
genus	13	27292666	-0.12459	0.0260992	1.80194e-06	14306	ebi-a-GCST90016975	rs4537857	T	C		|| id:ebi-a-GCST90016975	TRUE	reported	igd
genus	14	34150977	-0.201027	0.0428204	2.45748e-06	14306	ebi-a-GCST90016975	rs74622183	A	G		|| id:ebi-a-GCST90016975	TRUE	reported	igd
genus	14	76065563	0.224078	0.0449336	7.86249e-07	14306	ebi-a-GCST90016975	rs72723662	C	T		|| id:ebi-a-GCST90016975	TRUE	reported	igd
genus	17	20575697	0.127488	0.0267936	1.53183e-06	14306	ebi-a-GCST90016975	rs16941336	C	T		|| id:ebi-a-GCST90016975	TRUE	reported	igd
genus	18	10267733	0.216874	0.0483299	6.66423e-06	14306	ebi-a-GCST90016975	rs77356209	T	C		|| id:ebi-a-GCST90016975	TRUE	reported	igd
genus	20	811507	-0.108349	0.0240008	6.61089e-06	14306	ebi-a-GCST90016975	rs486484	A	G		|| id:ebi-a-GCST90016975	TRUE	reported	igd
genus	1	240118443	0.140717	0.0304142	2.79892e-06	14306	ebi-a-GCST90016977	rs12404911	C	T		|| id:ebi-a-GCST90016977	TRUE	reported	igd
genus	4	122282768	-0.161826	0.0353447	3.62677e-06	14306	ebi-a-GCST90016977	rs77285108	G	A		|| id:ebi-a-GCST90016977	TRUE	reported	igd
genus	6	159485742	0.135254	0.0286209	3.62485e-06	14306	ebi-a-GCST90016977	rs212393	A	G		|| id:ebi-a-GCST90016977	TRUE	reported	igd
genus	6	105089665	0.11411	0.0251099	5.60725e-06	14306	ebi-a-GCST90016977	rs7742829	C	T		|| id:ebi-a-GCST90016977	TRUE	reported	igd
genus	7	57364320	0.129726	0.0284563	4.29368e-06	14306	ebi-a-GCST90016977	rs73128290	A	G		|| id:ebi-a-GCST90016977	TRUE	reported	igd
genus	2	230943099	0.0958394	0.0214723	8.74017e-06	14306	ebi-a-GCST90016978	rs62190261	A	C		|| id:ebi-a-GCST90016978	TRUE	reported	igd
genus	4	156131004	-0.0551969	0.0122069	6.50744e-06	14306	ebi-a-GCST90016978	rs10461257	A	G		|| id:ebi-a-GCST90016978	TRUE	reported	igd
genus	5	29352420	0.121547	0.0270977	9.41803e-06	14306	ebi-a-GCST90016978	rs79150079	C	A		|| id:ebi-a-GCST90016978	TRUE	reported	igd
genus	7	118096925	0.114108	0.0251983	3.25364e-06	14306	ebi-a-GCST90016978	rs62467127	C	T		|| id:ebi-a-GCST90016978	TRUE	reported	igd
genus	9	83043376	0.0514099	0.011136	3.96862e-06	14306	ebi-a-GCST90016978	rs892686	A	G		|| id:ebi-a-GCST90016978	TRUE	reported	igd
genus	10	126448374	0.124992	0.0274797	5.60673e-06	14306	ebi-a-GCST90016978	rs78521377	C	T		|| id:ebi-a-GCST90016978	TRUE	reported	igd
genus	18	67555560	-0.0904325	0.0204253	3.34033e-06	14306	ebi-a-GCST90016978	rs17081797	A	G		|| id:ebi-a-GCST90016978	TRUE	reported	igd
genus	18	1779609	-0.0862164	0.0194354	8.45766e-06	14306	ebi-a-GCST90016978	rs73952017	C	T		|| id:ebi-a-GCST90016978	TRUE	reported	igd
genus	19	35883736	0.049815	0.0110787	7.13181e-06	14306	ebi-a-GCST90016978	rs60954665	T	G		|| id:ebi-a-GCST90016978	TRUE	reported	igd
genus	19	34076956	0.0580248	0.0117185	7.00697e-07	14306	ebi-a-GCST90016978	rs999354	T	A		|| id:ebi-a-GCST90016978	TRUE	reported	igd
genus	19	49279227	-0.0828853	0.0179623	5.66709e-06	14306	ebi-a-GCST90016978	rs62132810	A	G		|| id:ebi-a-GCST90016978	TRUE	reported	igd
genus	1	8419420	0.160425	0.0360857	8.40601e-06	14306	ebi-a-GCST90016979	rs6577484	G	A		|| id:ebi-a-GCST90016979	TRUE	reported	igd
genus	3	103025517	-0.108859	0.023425	3.49406e-06	14306	ebi-a-GCST90016979	rs1948423	T	A		|| id:ebi-a-GCST90016979	TRUE	reported	igd
genus	5	9368158	0.142664	0.0311021	8.61529e-06	14306	ebi-a-GCST90016979	rs40656	C	T		|| id:ebi-a-GCST90016979	TRUE	reported	igd
genus	5	71186626	-0.113424	0.0233137	1.12243e-06	14306	ebi-a-GCST90016979	rs6890185	C	T		|| id:ebi-a-GCST90016979	TRUE	reported	igd
genus	5	95717619	-0.180591	0.0409505	7.24453e-06	14306	ebi-a-GCST90016979	rs4869133	G	A		|| id:ebi-a-GCST90016979	TRUE	reported	igd
genus	5	113126539	-0.102648	0.0227508	6.99939e-06	14306	ebi-a-GCST90016979	rs10074000	T	C		|| id:ebi-a-GCST90016979	TRUE	reported	igd
genus	6	143718234	-0.126746	0.0274657	7.8001e-06	14306	ebi-a-GCST90016979	rs71564433	T	A		|| id:ebi-a-GCST90016979	TRUE	reported	igd
genus	12	30268485	0.0997048	0.0221926	8.92442e-06	14306	ebi-a-GCST90016979	rs10506058	A	G		|| id:ebi-a-GCST90016979	TRUE	reported	igd
genus	15	59704208	-0.114993	0.0257186	8.40621e-06	14306	ebi-a-GCST90016979	rs77845139	A	G		|| id:ebi-a-GCST90016979	TRUE	reported	igd
genus	18	6348227	0.14708	0.0320875	5.58509e-06	14306	ebi-a-GCST90016979	rs61267978	T	C		|| id:ebi-a-GCST90016979	TRUE	reported	igd
genus	18	69274308	-0.157938	0.034187	4.0634e-06	14306	ebi-a-GCST90016979	rs1942371	G	A		|| id:ebi-a-GCST90016979	TRUE	reported	igd
genus	2	195739311	0.0930178	0.0202658	1.71581e-06	14306	ebi-a-GCST90016981	rs73052258	G	A		|| id:ebi-a-GCST90016981	TRUE	reported	igd
genus	4	149818294	-0.108908	0.0240522	6.1355e-06	14306	ebi-a-GCST90016981	rs75672793	A	G		|| id:ebi-a-GCST90016981	TRUE	reported	igd
genus	7	24465024	-0.0540309	0.0120324	6.7825e-06	14306	ebi-a-GCST90016981	rs62448871	C	A		|| id:ebi-a-GCST90016981	TRUE	reported	igd
genus	10	8589813	-0.0537947	0.0120548	9.37605e-06	14306	ebi-a-GCST90016981	rs11597285	G	T		|| id:ebi-a-GCST90016981	TRUE	reported	igd
genus	11	107123199	0.0537401	0.0118848	6.52139e-06	14306	ebi-a-GCST90016981	rs10890671	C	T		|| id:ebi-a-GCST90016981	TRUE	reported	igd
genus	13	68610061	0.09597	0.0197312	8.79427e-07	14306	ebi-a-GCST90016981	rs9541268	C	A		|| id:ebi-a-GCST90016981	TRUE	reported	igd
genus	15	50026113	0.0668866	0.0149773	9.14724e-06	14306	ebi-a-GCST90016981	rs59414781	C	G		|| id:ebi-a-GCST90016981	TRUE	reported	igd
genus	16	77283458	-0.0563759	0.0127019	8.22565e-06	14306	ebi-a-GCST90016981	rs12921100	T	A		|| id:ebi-a-GCST90016981	TRUE	reported	igd
genus	17	47529492	0.0567751	0.011945	2.22039e-06	14306	ebi-a-GCST90016981	rs2671662	G	C		|| id:ebi-a-GCST90016981	TRUE	reported	igd
genus	19	56526640	-0.104264	0.0235841	7.09872e-06	14306	ebi-a-GCST90016981	rs149807560	C	A		|| id:ebi-a-GCST90016981	TRUE	reported	igd
genus	19	31760841	-0.0722307	0.01616	6.78172e-06	14306	ebi-a-GCST90016981	rs1496626	T	C		|| id:ebi-a-GCST90016981	TRUE	reported	igd
genus	21	29355467	0.0786551	0.0168217	2.42477e-06	14306	ebi-a-GCST90016981	rs2103510	G	A		|| id:ebi-a-GCST90016981	TRUE	reported	igd
genus	1	118723685	-0.0805036	0.0167257	1.56776e-06	14306	ebi-a-GCST90016986	rs1582238	C	T		|| id:ebi-a-GCST90016986	TRUE	reported	igd
genus	1	85205632	-0.13834	0.029554	3.51925e-06	14306	ebi-a-GCST90016986	rs9725395	A	G		|| id:ebi-a-GCST90016986	TRUE	reported	igd
genus	3	72207794	0.0977912	0.0197263	9.59555e-07	14306	ebi-a-GCST90016986	rs4677103	A	G		|| id:ebi-a-GCST90016986	TRUE	reported	igd
genus	4	120741726	0.0817755	0.0181686	6.82889e-06	14306	ebi-a-GCST90016986	rs2892880	G	A		|| id:ebi-a-GCST90016986	TRUE	reported	igd
genus	4	147414743	-0.147383	0.0293796	4.33112e-07	14306	ebi-a-GCST90016986	rs72731813	C	T		|| id:ebi-a-GCST90016986	TRUE	reported	igd
genus	7	79734541	0.106503	0.0238473	6.62811e-06	14306	ebi-a-GCST90016986	rs28696126	T	A		|| id:ebi-a-GCST90016986	TRUE	reported	igd
genus	9	8786663	0.11381	0.0232806	1.44534e-06	14306	ebi-a-GCST90016986	rs112893842	T	C		|| id:ebi-a-GCST90016986	TRUE	reported	igd
genus	10	66407366	-0.0715978	0.0156309	4.83237e-06	14306	ebi-a-GCST90016986	rs4344384	T	G		|| id:ebi-a-GCST90016986	TRUE	reported	igd
genus	21	41811003	0.174369	0.0362226	2.15293e-06	14306	ebi-a-GCST90016986	rs55658617	T	C		|| id:ebi-a-GCST90016986	TRUE	reported	igd
genus	22	24804081	0.142939	0.0299793	2.52046e-06	14306	ebi-a-GCST90016986	rs9608282	T	G		|| id:ebi-a-GCST90016986	TRUE	reported	igd
genus	1	68664315	-0.127185	0.0281887	6.54757e-06	14306	ebi-a-GCST90016987	rs12031543	T	C		|| id:ebi-a-GCST90016987	TRUE	reported	igd
genus	2	198089911	0.109402	0.0226964	1.79449e-06	14306	ebi-a-GCST90016987	rs16863365	A	G		|| id:ebi-a-GCST90016987	TRUE	reported	igd
genus	3	67478973	0.119141	0.0250891	3.78669e-06	14306	ebi-a-GCST90016987	rs13066142	G	A		|| id:ebi-a-GCST90016987	TRUE	reported	igd
genus	5	52633741	0.0854927	0.0172749	8.5487e-07	14306	ebi-a-GCST90016987	rs2456226	A	C		|| id:ebi-a-GCST90016987	TRUE	reported	igd
genus	5	139410687	0.0770979	0.0169735	4.93856e-06	14306	ebi-a-GCST90016987	rs6580353	T	C		|| id:ebi-a-GCST90016987	TRUE	reported	igd
genus	8	105462047	-0.0811971	0.0174234	2.42438e-06	14306	ebi-a-GCST90016987	rs2853179	T	C		|| id:ebi-a-GCST90016987	TRUE	reported	igd
genus	8	57972916	-0.106594	0.0239337	8.29755e-06	14306	ebi-a-GCST90016987	rs72647089	T	G		|| id:ebi-a-GCST90016987	TRUE	reported	igd
genus	10	130170270	0.0654931	0.0148681	9.14282e-06	14306	ebi-a-GCST90016987	rs2032031	G	A		|| id:ebi-a-GCST90016987	TRUE	reported	igd
genus	13	64264446	-0.154496	0.0339396	6.65426e-06	14306	ebi-a-GCST90016987	rs2590913	A	G		|| id:ebi-a-GCST90016987	TRUE	reported	igd
genus	14	97116904	0.0691756	0.0147285	2.70302e-06	14306	ebi-a-GCST90016987	rs11160353	A	T		|| id:ebi-a-GCST90016987	TRUE	reported	igd
genus	18	13447995	-0.212582	0.0470044	5.64313e-06	14306	ebi-a-GCST90016987	rs4797774	A	G		|| id:ebi-a-GCST90016987	TRUE	reported	igd
genus	1	172809633	0.0727223	0.016451	9.46085e-06	14306	ebi-a-GCST90016988	rs75416973	A	G		|| id:ebi-a-GCST90016988	TRUE	reported	igd
genus	3	45809449	-0.0601454	0.0135366	9.60771e-06	14306	ebi-a-GCST90016988	rs764177	C	A		|| id:ebi-a-GCST90016988	TRUE	reported	igd
genus	4	23294359	0.0773514	0.0170915	7.37055e-06	14306	ebi-a-GCST90016988	rs10938938	A	G		|| id:ebi-a-GCST90016988	TRUE	reported	igd
genus	7	150890034	0.0647132	0.0143314	5.93267e-06	14306	ebi-a-GCST90016988	rs2435610	A	C		|| id:ebi-a-GCST90016988	TRUE	reported	igd
genus	8	138295725	-0.0655301	0.013186	5.50744e-07	14306	ebi-a-GCST90016988	rs11166701	G	A		|| id:ebi-a-GCST90016988	TRUE	reported	igd
genus	9	25447080	-0.161296	0.0364332	8.19219e-06	14306	ebi-a-GCST90016988	rs76680460	G	A		|| id:ebi-a-GCST90016988	TRUE	reported	igd
genus	10	23199653	0.0668509	0.0147685	5.83727e-06	14306	ebi-a-GCST90016988	rs4747450	C	A		|| id:ebi-a-GCST90016988	TRUE	reported	igd
genus	11	10967286	0.076227	0.0170411	5.1363e-06	14306	ebi-a-GCST90016988	rs517089	T	A		|| id:ebi-a-GCST90016988	TRUE	reported	igd
genus	11	92267129	0.0596297	0.0130052	4.8568e-06	14306	ebi-a-GCST90016988	rs4753063	A	G		|| id:ebi-a-GCST90016988	TRUE	reported	igd
genus	14	102458052	-0.113054	0.0261933	7.88116e-06	14306	ebi-a-GCST90016988	rs10138457	T	C		|| id:ebi-a-GCST90016988	TRUE	reported	igd
genus	15	32955095	0.0662403	0.0146315	5.91412e-06	14306	ebi-a-GCST90016988	rs11071887	T	C		|| id:ebi-a-GCST90016988	TRUE	reported	igd
genus	16	9336862	0.0865932	0.0193719	8.07904e-06	14306	ebi-a-GCST90016988	rs2314294	T	C		|| id:ebi-a-GCST90016988	TRUE	reported	igd
genus	1	9136139	-0.188618	0.0403613	3.34649e-06	14306	ebi-a-GCST90016990	rs112205261	T	C		|| id:ebi-a-GCST90016990	TRUE	reported	igd
genus	2	45453805	0.107774	0.0236527	4.1759e-06	14306	ebi-a-GCST90016990	rs3851328	G	T		|| id:ebi-a-GCST90016990	TRUE	reported	igd
genus	2	141337454	-0.0879736	0.0197127	8.37124e-06	14306	ebi-a-GCST90016990	rs6430926	T	C		|| id:ebi-a-GCST90016990	TRUE	reported	igd
genus	3	20807454	-0.121331	0.0272024	7.61921e-06	14306	ebi-a-GCST90016990	rs13070736	A	C		|| id:ebi-a-GCST90016990	TRUE	reported	igd
genus	4	70483957	-0.093486	0.0210208	9.02714e-06	14306	ebi-a-GCST90016990	rs2877457	G	A		|| id:ebi-a-GCST90016990	TRUE	reported	igd
genus	7	38335954	-0.0980582	0.0197653	7.36207e-07	14306	ebi-a-GCST90016990	rs2240838	G	A		|| id:ebi-a-GCST90016990	TRUE	reported	igd
genus	11	102461599	-0.0907728	0.0198096	5.2313e-06	14306	ebi-a-GCST90016990	rs1784446	A	G		|| id:ebi-a-GCST90016990	TRUE	reported	igd
genus	15	65691324	0.108495	0.0245457	8.94211e-06	14306	ebi-a-GCST90016990	rs67490567	T	C		|| id:ebi-a-GCST90016990	TRUE	reported	igd
genus	17	17098213	-0.110522	0.0247653	5.71465e-06	14306	ebi-a-GCST90016990	rs4985746	A	G		|| id:ebi-a-GCST90016990	TRUE	reported	igd
genus	20	55647869	0.175349	0.0378576	4.8257e-06	14306	ebi-a-GCST90016990	rs76663501	C	T		|| id:ebi-a-GCST90016990	TRUE	reported	igd
genus	21	29778032	-0.102572	0.0221108	3.88893e-06	14306	ebi-a-GCST90016990	rs2223081	A	G		|| id:ebi-a-GCST90016990	TRUE	reported	igd
genus	2	19973210	0.0893384	0.0199069	9.84419e-06	14306	ebi-a-GCST90016991	rs12710729	C	A		|| id:ebi-a-GCST90016991	TRUE	reported	igd
genus	3	111419486	0.120965	0.0263054	5.26842e-06	14306	ebi-a-GCST90016991	rs1553971	T	G		|| id:ebi-a-GCST90016991	TRUE	reported	igd
genus	4	189060431	-0.0978125	0.0216636	8.21826e-06	14306	ebi-a-GCST90016991	rs11938607	C	T		|| id:ebi-a-GCST90016991	TRUE	reported	igd
genus	8	55330814	0.137001	0.0302124	7.7464e-06	14306	ebi-a-GCST90016991	rs13258851	A	G		|| id:ebi-a-GCST90016991	TRUE	reported	igd
genus	8	50822676	-0.106447	0.0224159	2.71688e-06	14306	ebi-a-GCST90016991	rs3812426	A	G		|| id:ebi-a-GCST90016991	TRUE	reported	igd
genus	10	109417101	-0.0952742	0.0211569	8.85116e-06	14306	ebi-a-GCST90016991	rs12257723	A	C		|| id:ebi-a-GCST90016991	TRUE	reported	igd
genus	11	24001840	0.129006	0.0284844	4.9187e-06	14306	ebi-a-GCST90016991	rs11027642	C	T		|| id:ebi-a-GCST90016991	TRUE	reported	igd
genus	11	124764527	-0.121065	0.0251658	1.65002e-06	14306	ebi-a-GCST90016991	rs12278566	T	A		|| id:ebi-a-GCST90016991	TRUE	reported	igd
genus	15	36178565	-0.107319	0.022515	2.23748e-06	14306	ebi-a-GCST90016991	rs2683098	T	C		|| id:ebi-a-GCST90016991	TRUE	reported	igd
genus	15	53375201	0.091546	0.0195787	3.22887e-06	14306	ebi-a-GCST90016991	rs1508033	A	C		|| id:ebi-a-GCST90016991	TRUE	reported	igd
genus	17	53367641	0.100627	0.022546	7.34852e-06	14306	ebi-a-GCST90016991	rs11079158	T	C		|| id:ebi-a-GCST90016991	TRUE	reported	igd
genus	21	21610254	0.0939071	0.0201104	4.16217e-06	14306	ebi-a-GCST90016991	rs4462860	G	A		|| id:ebi-a-GCST90016991	TRUE	reported	igd
genus	2	19611953	0.182308	0.0382298	2.1734e-06	14306	ebi-a-GCST90016992	rs114731706	T	G		|| id:ebi-a-GCST90016992	TRUE	reported	igd
genus	2	236439879	0.132988	0.0298306	5.88044e-06	14306	ebi-a-GCST90016992	rs77655283	G	A		|| id:ebi-a-GCST90016992	TRUE	reported	igd
genus	4	127336602	0.0966008	0.0162677	3.05647e-09	14306	ebi-a-GCST90016992	rs11098863	A	T		|| id:ebi-a-GCST90016992	TRUE	reported	igd
genus	6	37567189	0.0755513	0.0166263	5.69626e-06	14306	ebi-a-GCST90016992	rs9470637	T	A		|| id:ebi-a-GCST90016992	TRUE	reported	igd
genus	7	89709883	0.0843291	0.0189864	8.89857e-06	14306	ebi-a-GCST90016992	rs2051957	C	T		|| id:ebi-a-GCST90016992	TRUE	reported	igd
genus	8	113109756	0.132323	0.0293688	6.40575e-06	14306	ebi-a-GCST90016992	rs10098492	T	C		|| id:ebi-a-GCST90016992	TRUE	reported	igd
genus	10	20280612	-0.0860019	0.0169148	5.23854e-07	14306	ebi-a-GCST90016992	rs7923280	T	A		|| id:ebi-a-GCST90016992	TRUE	reported	igd
genus	11	62174193	-0.0980897	0.0208995	2.94042e-06	14306	ebi-a-GCST90016992	rs3017103	G	A		|| id:ebi-a-GCST90016992	TRUE	reported	igd
genus	12	69515102	0.26199	0.055123	4.8492e-06	14306	ebi-a-GCST90016992	rs73331712	T	C		|| id:ebi-a-GCST90016992	TRUE	reported	igd
genus	2	71145246	-0.130842	0.0266671	7.37904e-07	14306	ebi-a-GCST90016999	rs3771393	T	C		|| id:ebi-a-GCST90016999	TRUE	reported	igd
genus	3	39604954	-0.139489	0.0316186	8.70062e-06	14306	ebi-a-GCST90016999	rs1768152	C	T		|| id:ebi-a-GCST90016999	TRUE	reported	igd
genus	6	39940437	0.111463	0.0252788	9.75326e-06	14306	ebi-a-GCST90016999	rs6934739	A	G		|| id:ebi-a-GCST90016999	TRUE	reported	igd
genus	7	73043561	0.20951	0.0454847	3.09678e-06	14306	ebi-a-GCST90016999	rs151257695	A	G		|| id:ebi-a-GCST90016999	TRUE	reported	igd
genus	8	5433699	0.109644	0.0228306	1.49091e-06	14306	ebi-a-GCST90016999	rs2733072	G	A		|| id:ebi-a-GCST90016999	TRUE	reported	igd
genus	10	96758467	0.10585	0.0237114	8.20012e-06	14306	ebi-a-GCST90016999	rs11818408	G	A		|| id:ebi-a-GCST90016999	TRUE	reported	igd
genus	11	115165111	0.138612	0.0291906	2.73149e-06	14306	ebi-a-GCST90016999	rs7104872	G	A		|| id:ebi-a-GCST90016999	TRUE	reported	igd
genus	14	89484373	0.172263	0.039601	8.27237e-06	14306	ebi-a-GCST90016999	rs10147907	T	G		|| id:ebi-a-GCST90016999	TRUE	reported	igd
genus	18	45753272	0.131469	0.0281712	2.66557e-06	14306	ebi-a-GCST90016999	rs11876297	T	C		|| id:ebi-a-GCST90016999	TRUE	reported	igd
genus	1	116082909	0.0870025	0.019779	9.75371e-06	14306	ebi-a-GCST90017003	rs143694765	T	C		|| id:ebi-a-GCST90017003	TRUE	reported	igd
genus	1	170900221	-0.0622701	0.0140572	6.8552e-06	14306	ebi-a-GCST90017003	rs3980709	A	T		|| id:ebi-a-GCST90017003	TRUE	reported	igd
genus	1	234530370	0.0503179	0.0108389	3.53387e-06	14306	ebi-a-GCST90017003	rs10797540	A	G		|| id:ebi-a-GCST90017003	TRUE	reported	igd
genus	2	125553155	0.0528824	0.0109486	1.37965e-06	14306	ebi-a-GCST90017003	rs314726	T	C		|| id:ebi-a-GCST90017003	TRUE	reported	igd
genus	7	121281238	-0.0527827	0.0113464	4.20678e-06	14306	ebi-a-GCST90017003	rs10248854	C	A		|| id:ebi-a-GCST90017003	TRUE	reported	igd
genus	9	92013419	0.0536319	0.0120201	9.89829e-06	14306	ebi-a-GCST90017003	rs62547233	A	G		|| id:ebi-a-GCST90017003	TRUE	reported	igd
genus	9	129425745	-0.0576035	0.0130853	5.36908e-06	14306	ebi-a-GCST90017003	rs59427698	A	G		|| id:ebi-a-GCST90017003	TRUE	reported	igd
genus	11	8129537	-0.129364	0.0289021	6.44421e-06	14306	ebi-a-GCST90017003	rs2884897	A	G		|| id:ebi-a-GCST90017003	TRUE	reported	igd
genus	11	98523638	-0.0635522	0.0140072	6.21828e-06	14306	ebi-a-GCST90017003	rs10892089	C	G		|| id:ebi-a-GCST90017003	TRUE	reported	igd
genus	12	20066025	-0.113141	0.0243541	1.84434e-06	14306	ebi-a-GCST90017003	rs117151453	G	C		|| id:ebi-a-GCST90017003	TRUE	reported	igd
genus	15	93006765	-0.0901402	0.0174602	5.39946e-07	14306	ebi-a-GCST90017003	rs35398954	A	G		|| id:ebi-a-GCST90017003	TRUE	reported	igd
genus	18	37703874	-0.156596	0.0336234	4.10129e-06	14306	ebi-a-GCST90017003	rs16960159	C	G		|| id:ebi-a-GCST90017003	TRUE	reported	igd
genus	1	24927625	-0.0616691	0.0125259	7.20444e-07	14306	ebi-a-GCST90017011	rs4378146	A	C		|| id:ebi-a-GCST90017011	TRUE	reported	igd
genus	2	5532793	0.0508345	0.0113843	8.49533e-06	14306	ebi-a-GCST90017011	rs792108	C	T		|| id:ebi-a-GCST90017011	TRUE	reported	igd
genus	2	226649570	-0.0710571	0.015924	4.54527e-06	14306	ebi-a-GCST90017011	rs62187631	T	C		|| id:ebi-a-GCST90017011	TRUE	reported	igd
genus	3	64252803	-0.0739124	0.0151073	7.77428e-07	14306	ebi-a-GCST90017011	rs704418	C	T		|| id:ebi-a-GCST90017011	TRUE	reported	igd
genus	5	29595000	-0.0701397	0.0145589	1.56769e-06	14306	ebi-a-GCST90017011	rs62353480	A	G		|| id:ebi-a-GCST90017011	TRUE	reported	igd
genus	7	148856720	0.0492427	0.0109365	5.46739e-06	14306	ebi-a-GCST90017011	rs60254196	G	A		|| id:ebi-a-GCST90017011	TRUE	reported	igd
genus	8	15360718	-0.0771914	0.0160344	1.07686e-06	14306	ebi-a-GCST90017011	rs2132128	G	A		|| id:ebi-a-GCST90017011	TRUE	reported	igd
genus	9	130371107	0.0497415	0.0107941	3.94176e-06	14306	ebi-a-GCST90017011	rs2039204	A	T		|| id:ebi-a-GCST90017011	TRUE	reported	igd
genus	10	120447429	-0.0953657	0.020407	3.93895e-06	14306	ebi-a-GCST90017011	rs3303	T	C		|| id:ebi-a-GCST90017011	TRUE	reported	igd
genus	10	112177119	-0.0967298	0.0205426	2.98834e-06	14306	ebi-a-GCST90017011	rs2025938	G	A		|| id:ebi-a-GCST90017011	TRUE	reported	igd
genus	12	58658311	-0.0597324	0.0134458	8.29564e-06	14306	ebi-a-GCST90017011	rs73103914	A	G		|| id:ebi-a-GCST90017011	TRUE	reported	igd
genus	15	88353215	0.0792146	0.0180505	8.06325e-06	14306	ebi-a-GCST90017011	rs8028026	G	A		|| id:ebi-a-GCST90017011	TRUE	reported	igd
genus	16	73821805	-0.104026	0.022217	4.9289e-06	14306	ebi-a-GCST90017011	rs8063430	T	C		|| id:ebi-a-GCST90017011	TRUE	reported	igd
genus	17	70697344	-0.061617	0.0136576	7.30988e-06	14306	ebi-a-GCST90017011	rs9905659	G	A		|| id:ebi-a-GCST90017011	TRUE	reported	igd
genus	17	70721782	-0.0494799	0.0108105	4.96158e-06	14306	ebi-a-GCST90017011	rs1864685	A	C		|| id:ebi-a-GCST90017011	TRUE	reported	igd
genus	18	10370596	-0.0568339	0.0127894	8.95757e-06	14306	ebi-a-GCST90017011	rs206581	A	G		|| id:ebi-a-GCST90017011	TRUE	reported	igd
genus	20	55937366	0.0659543	0.0148763	5.86894e-06	14306	ebi-a-GCST90017011	rs167879	T	C		|| id:ebi-a-GCST90017011	TRUE	reported	igd
genus	20	25257001	0.141575	0.0313559	7.28652e-06	14306	ebi-a-GCST90017011	rs6515626	G	A		|| id:ebi-a-GCST90017011	TRUE	reported	igd
genus	21	42681392	-0.0572129	0.0130007	7.68493e-06	14306	ebi-a-GCST90017011	rs10439674	A	G		|| id:ebi-a-GCST90017011	TRUE	reported	igd
genus	1	210628449	-0.190729	0.0433608	7.16902e-06	14306	ebi-a-GCST90017012	rs3765837	T	G		|| id:ebi-a-GCST90017012	TRUE	reported	igd
genus	1	83136096	-0.21399	0.0490592	7.98197e-06	14306	ebi-a-GCST90017012	rs72939513	A	G		|| id:ebi-a-GCST90017012	TRUE	reported	igd
genus	2	30158494	0.107597	0.0239228	8.61133e-06	14306	ebi-a-GCST90017012	rs13412653	A	C		|| id:ebi-a-GCST90017012	TRUE	reported	igd
genus	3	187450354	-0.242965	0.0466177	1.67487e-07	14306	ebi-a-GCST90017012	rs76287110	A	T		|| id:ebi-a-GCST90017012	TRUE	reported	igd
genus	4	8142607	-0.180293	0.0403296	8.10849e-06	14306	ebi-a-GCST90017012	rs35042269	C	A		|| id:ebi-a-GCST90017012	TRUE	reported	igd
genus	4	136768501	0.181405	0.0377102	1.42889e-06	14306	ebi-a-GCST90017012	rs72714787	C	A		|| id:ebi-a-GCST90017012	TRUE	reported	igd
genus	7	136937189	0.17869	0.037722	4.0242e-06	14306	ebi-a-GCST90017012	rs322296	G	A		|| id:ebi-a-GCST90017012	TRUE	reported	igd
genus	7	47144505	-0.153972	0.0338918	7.03947e-06	14306	ebi-a-GCST90017012	rs71545975	A	G		|| id:ebi-a-GCST90017012	TRUE	reported	igd
genus	7	129433205	-0.128261	0.0285123	9.16706e-06	14306	ebi-a-GCST90017012	rs117347059	G	C		|| id:ebi-a-GCST90017012	TRUE	reported	igd
genus	7	18970607	-0.149852	0.0333315	7.75586e-06	14306	ebi-a-GCST90017012	rs768830	A	G		|| id:ebi-a-GCST90017012	TRUE	reported	igd
genus	9	88787144	-0.102908	0.0231571	9.0567e-06	14306	ebi-a-GCST90017012	rs4596722	G	A		|| id:ebi-a-GCST90017012	TRUE	reported	igd
genus	12	131024079	-0.172495	0.0388567	8.36681e-06	14306	ebi-a-GCST90017012	rs61934597	C	T		|| id:ebi-a-GCST90017012	TRUE	reported	igd
genus	12	29024534	-0.12867	0.0249946	3.43764e-07	14306	ebi-a-GCST90017012	rs7294633	T	C		|| id:ebi-a-GCST90017012	TRUE	reported	igd
genus	17	10148653	0.116884	0.0234834	6.70641e-07	14306	ebi-a-GCST90017012	rs7220558	A	T		|| id:ebi-a-GCST90017012	TRUE	reported	igd
genus	17	52957210	-0.196423	0.0433538	6.37016e-06	14306	ebi-a-GCST90017012	rs16955299	G	A		|| id:ebi-a-GCST90017012	TRUE	reported	igd
genus	1	43767569	0.0637084	0.0135355	2.19053e-06	14306	ebi-a-GCST90017019	rs12566247	T	A		|| id:ebi-a-GCST90017019	TRUE	reported	igd
genus	2	6514088	0.0818068	0.0165992	8.56624e-07	14306	ebi-a-GCST90017019	rs716604	A	G		|| id:ebi-a-GCST90017019	TRUE	reported	igd
genus	2	140898088	0.183158	0.0402743	4.91157e-06	14306	ebi-a-GCST90017019	rs72982915	C	T		|| id:ebi-a-GCST90017019	TRUE	reported	igd
genus	3	150620956	-0.0685233	0.0152546	7.84061e-06	14306	ebi-a-GCST90017019	rs2276760	A	G		|| id:ebi-a-GCST90017019	TRUE	reported	igd
genus	3	10611142	0.130074	0.0267179	2.20308e-06	14306	ebi-a-GCST90017019	rs62240188	G	A		|| id:ebi-a-GCST90017019	TRUE	reported	igd
genus	3	17187502	0.0581947	0.0131455	9.85871e-06	14306	ebi-a-GCST90017019	rs9823439	C	T		|| id:ebi-a-GCST90017019	TRUE	reported	igd
genus	4	114608814	-0.141905	0.0315074	7.305e-06	14306	ebi-a-GCST90017019	rs994794	G	C		|| id:ebi-a-GCST90017019	TRUE	reported	igd
genus	5	17209391	0.120632	0.0257529	1.91743e-06	14306	ebi-a-GCST90017019	rs2731794	C	T		|| id:ebi-a-GCST90017019	TRUE	reported	igd
genus	6	67200802	0.0692373	0.0151154	8.56959e-06	14306	ebi-a-GCST90017019	rs6934519	C	T		|| id:ebi-a-GCST90017019	TRUE	reported	igd
genus	6	155737906	0.162658	0.0367647	9.40503e-06	14306	ebi-a-GCST90017019	rs62427239	C	A		|| id:ebi-a-GCST90017019	TRUE	reported	igd
genus	7	66890843	0.0918017	0.0194885	2.06072e-06	14306	ebi-a-GCST90017019	rs10262702	T	C		|| id:ebi-a-GCST90017019	TRUE	reported	igd
genus	7	22007303	0.060368	0.0131793	4.1223e-06	14306	ebi-a-GCST90017019	rs1859797	G	A		|| id:ebi-a-GCST90017019	TRUE	reported	igd
genus	8	3763540	0.107194	0.0250013	6.37926e-06	14306	ebi-a-GCST90017019	rs17067892	C	T		|| id:ebi-a-GCST90017019	TRUE	reported	igd
genus	10	13124513	0.0660742	0.0134139	6.982e-07	14306	ebi-a-GCST90017019	rs11258178	A	G		|| id:ebi-a-GCST90017019	TRUE	reported	igd
genus	11	94364293	-0.151142	0.0306922	5.12165e-07	14306	ebi-a-GCST90017019	rs12226153	A	G		|| id:ebi-a-GCST90017019	TRUE	reported	igd
genus	13	23343542	-0.0585038	0.013219	9.71292e-06	14306	ebi-a-GCST90017019	rs1000888	C	G		|| id:ebi-a-GCST90017019	TRUE	reported	igd
genus	15	93819735	-0.0658116	0.0140767	2.98353e-06	14306	ebi-a-GCST90017019	rs7170984	T	C		|| id:ebi-a-GCST90017019	TRUE	reported	igd
genus	16	58818770	-0.175324	0.038599	8.71806e-07	14306	ebi-a-GCST90017019	rs4784055	T	C		|| id:ebi-a-GCST90017019	TRUE	reported	igd
genus	16	85327902	-0.0729524	0.0152948	1.34623e-06	14306	ebi-a-GCST90017019	rs2930225	T	G		|| id:ebi-a-GCST90017019	TRUE	reported	igd
genus	20	6218922	-0.218507	0.0490152	7.41635e-06	14306	ebi-a-GCST90017019	rs4113676	A	C		|| id:ebi-a-GCST90017019	TRUE	reported	igd
genus	1	118425334	-0.0553339	0.0120621	4.90671e-06	14306	ebi-a-GCST90017021	rs9919338	G	C		|| id:ebi-a-GCST90017021	TRUE	reported	igd
genus	1	35328576	0.106101	0.0222904	2.15432e-06	14306	ebi-a-GCST90017021	rs12078956	C	G		|| id:ebi-a-GCST90017021	TRUE	reported	igd
genus	2	53946431	-0.116881	0.0246589	1.63422e-06	14306	ebi-a-GCST90017021	rs72793667	A	G		|| id:ebi-a-GCST90017021	TRUE	reported	igd
genus	3	165996415	-0.0564927	0.0121736	3.91913e-06	14306	ebi-a-GCST90017021	rs2862811	C	T		|| id:ebi-a-GCST90017021	TRUE	reported	igd
genus	4	165786478	-0.055381	0.0123659	7.47291e-06	14306	ebi-a-GCST90017021	rs9308097	G	A		|| id:ebi-a-GCST90017021	TRUE	reported	igd
genus	4	166588085	-0.0666305	0.0141577	5.20811e-06	14306	ebi-a-GCST90017021	rs2322265	C	T		|| id:ebi-a-GCST90017021	TRUE	reported	igd
genus	5	109403564	-0.108906	0.0242055	2.55452e-06	14306	ebi-a-GCST90017021	rs113859143	G	C		|| id:ebi-a-GCST90017021	TRUE	reported	igd
genus	6	71966268	0.0604208	0.0135965	8.98194e-06	14306	ebi-a-GCST90017021	rs4452603	T	G		|| id:ebi-a-GCST90017021	TRUE	reported	igd
genus	8	121244406	-0.0568869	0.0121152	3.05626e-06	14306	ebi-a-GCST90017021	rs10093861	G	A		|| id:ebi-a-GCST90017021	TRUE	reported	igd
genus	10	65563647	-0.0550587	0.0121847	6.55043e-06	14306	ebi-a-GCST90017021	rs3999074	G	T		|| id:ebi-a-GCST90017021	TRUE	reported	igd
genus	10	44346094	-0.105963	0.0232501	5.59667e-06	14306	ebi-a-GCST90017021	rs1254846	A	G		|| id:ebi-a-GCST90017021	TRUE	reported	igd
genus	11	3248876	-0.190615	0.0414403	2.62029e-06	14306	ebi-a-GCST90017021	rs35035870	T	C		|| id:ebi-a-GCST90017021	TRUE	reported	igd
genus	13	40419314	-0.062804	0.0130744	1.38618e-06	14306	ebi-a-GCST90017021	rs9788306	C	T		|| id:ebi-a-GCST90017021	TRUE	reported	igd
genus	16	23631307	0.125481	0.0259008	3.14826e-06	14306	ebi-a-GCST90017021	rs369444	C	G		|| id:ebi-a-GCST90017021	TRUE	reported	igd
genus	19	17865305	0.200628	0.0449372	1.58161e-06	14306	ebi-a-GCST90017021	rs1363769	C	T		|| id:ebi-a-GCST90017021	TRUE	reported	igd
genus	19	2571232	0.0679483	0.0133496	3.721e-07	14306	ebi-a-GCST90017021	rs7249113	G	A		|| id:ebi-a-GCST90017021	TRUE	reported	igd
genus	1	53773248	-0.118868	0.0259753	3.38174e-06	14306	ebi-a-GCST90017025	rs78848836	A	G		|| id:ebi-a-GCST90017025	TRUE	reported	igd
genus	1	166199362	0.117095	0.02591	7.39861e-06	14306	ebi-a-GCST90017025	rs12131224	C	T		|| id:ebi-a-GCST90017025	TRUE	reported	igd
genus	1	82384407	0.0751466	0.0153934	1.10647e-06	14306	ebi-a-GCST90017025	rs2050911	G	A		|| id:ebi-a-GCST90017025	TRUE	reported	igd
genus	1	108102470	-0.087088	0.0197008	8.27428e-06	14306	ebi-a-GCST90017025	rs79476906	T	A		|| id:ebi-a-GCST90017025	TRUE	reported	igd
genus	3	42568440	0.0784637	0.0144768	7.16556e-08	14306	ebi-a-GCST90017025	rs437876	T	C		|| id:ebi-a-GCST90017025	TRUE	reported	igd
genus	3	148269083	-0.0970258	0.0181807	1.45589e-07	14306	ebi-a-GCST90017025	rs985416	T	C		|| id:ebi-a-GCST90017025	TRUE	reported	igd
genus	6	145006780	0.107801	0.0229777	3.46785e-06	14306	ebi-a-GCST90017025	rs9403580	C	T		|| id:ebi-a-GCST90017025	TRUE	reported	igd
genus	7	96965504	-0.0748504	0.0165681	5.87503e-06	14306	ebi-a-GCST90017025	rs62496417	T	G		|| id:ebi-a-GCST90017025	TRUE	reported	igd
genus	8	56839500	-0.0784757	0.0177648	9.48135e-06	14306	ebi-a-GCST90017025	rs7341608	T	C		|| id:ebi-a-GCST90017025	TRUE	reported	igd
genus	9	14477851	-0.107898	0.0232346	3.10506e-06	14306	ebi-a-GCST90017025	rs573933	T	C		|| id:ebi-a-GCST90017025	TRUE	reported	igd
genus	9	7273249	-0.0683706	0.0143691	1.71502e-06	14306	ebi-a-GCST90017025	rs10815577	C	G		|| id:ebi-a-GCST90017025	TRUE	reported	igd
genus	12	56256262	0.0761893	0.0170127	7.55962e-06	14306	ebi-a-GCST90017025	rs2371284	C	T		|| id:ebi-a-GCST90017025	TRUE	reported	igd
genus	14	21455973	-0.0681973	0.0149831	6.08597e-06	14306	ebi-a-GCST90017025	rs4981345	T	C		|| id:ebi-a-GCST90017025	TRUE	reported	igd
genus	16	79092359	0.168045	0.0382637	3.3335e-06	14306	ebi-a-GCST90017025	rs74034332	G	A		|| id:ebi-a-GCST90017025	TRUE	reported	igd
genus	17	36155074	-0.0816269	0.01838	9.01675e-06	14306	ebi-a-GCST90017025	rs7213933	T	A		|| id:ebi-a-GCST90017025	TRUE	reported	igd
genus	19	13962924	0.0892098	0.0197665	8.04211e-06	14306	ebi-a-GCST90017025	rs8104225	A	G		|| id:ebi-a-GCST90017025	TRUE	reported	igd
genus	1	90818872	-0.117029	0.0243085	1.4003e-06	14306	ebi-a-GCST90017027	rs10801803	G	A		|| id:ebi-a-GCST90017027	TRUE	reported	igd
genus	2	228100140	0.102292	0.0212319	1.58891e-06	14306	ebi-a-GCST90017027	rs62277846	C	T		|| id:ebi-a-GCST90017027	TRUE	reported	igd
genus	2	168628871	-0.0798769	0.0168846	2.29166e-06	14306	ebi-a-GCST90017027	rs13024781	T	C		|| id:ebi-a-GCST90017027	TRUE	reported	igd
genus	3	100496680	-0.121162	0.0233467	2.4134e-07	14306	ebi-a-GCST90017027	rs9873555	G	C		|| id:ebi-a-GCST90017027	TRUE	reported	igd
genus	4	114220647	-0.0845848	0.0170693	7.68192e-07	14306	ebi-a-GCST90017027	rs67078837	T	C		|| id:ebi-a-GCST90017027	TRUE	reported	igd
genus	6	81214803	-0.110443	0.0235801	2.85825e-06	14306	ebi-a-GCST90017027	rs57091572	A	G		|| id:ebi-a-GCST90017027	TRUE	reported	igd
genus	8	23071054	0.0886512	0.0199045	6.92054e-06	14306	ebi-a-GCST90017027	rs57254474	G	A		|| id:ebi-a-GCST90017027	TRUE	reported	igd
genus	11	74391775	-0.0974344	0.0181279	9.34932e-08	14306	ebi-a-GCST90017027	rs10793103	T	C		|| id:ebi-a-GCST90017027	TRUE	reported	igd
genus	11	19572557	-0.0973842	0.0194791	7.68652e-07	14306	ebi-a-GCST90017027	rs10741777	T	C		|| id:ebi-a-GCST90017027	TRUE	reported	igd
genus	12	129539818	0.179838	0.0393797	6.34118e-06	14306	ebi-a-GCST90017027	rs61944774	A	G		|| id:ebi-a-GCST90017027	TRUE	reported	igd
genus	15	31697284	0.136523	0.0303128	9.83196e-06	14306	ebi-a-GCST90017027	rs75356640	G	A		|| id:ebi-a-GCST90017027	TRUE	reported	igd
genus	16	84992314	0.112064	0.0228369	1.80992e-06	14306	ebi-a-GCST90017027	rs955844	A	C		|| id:ebi-a-GCST90017027	TRUE	reported	igd
genus	1	18501459	-0.183147	0.038148	1.27809e-06	14306	ebi-a-GCST90017030	rs16861661	G	A		|| id:ebi-a-GCST90017030	TRUE	reported	igd
genus	2	28903275	-0.0852686	0.0176504	1.59199e-06	14306	ebi-a-GCST90017030	rs11674854	C	T		|| id:ebi-a-GCST90017030	TRUE	reported	igd
genus	2	199312684	-0.0805447	0.0177429	8.96314e-06	14306	ebi-a-GCST90017030	rs12693845	C	T		|| id:ebi-a-GCST90017030	TRUE	reported	igd
genus	2	135755629	0.0804001	0.0178207	4.93106e-06	14306	ebi-a-GCST90017030	rs1530559	G	A		|| id:ebi-a-GCST90017030	TRUE	reported	igd
genus	3	173151665	-0.219886	0.0475759	7.32706e-06	14306	ebi-a-GCST90017030	rs77478751	A	G		|| id:ebi-a-GCST90017030	TRUE	reported	igd
genus	4	109896462	0.187692	0.0394585	2.24383e-06	14306	ebi-a-GCST90017030	rs62314653	C	A		|| id:ebi-a-GCST90017030	TRUE	reported	igd
genus	6	151027636	0.139784	0.0310414	6.83439e-06	14306	ebi-a-GCST90017030	rs75127669	C	A		|| id:ebi-a-GCST90017030	TRUE	reported	igd
genus	8	69010103	-0.079195	0.0171791	4.24766e-06	14306	ebi-a-GCST90017030	rs768253	T	G		|| id:ebi-a-GCST90017030	TRUE	reported	igd
genus	13	23834968	-0.107134	0.0221883	3.12097e-06	14306	ebi-a-GCST90017030	rs7399658	G	A		|| id:ebi-a-GCST90017030	TRUE	reported	igd
genus	16	73890910	0.0815092	0.0169441	1.40618e-06	14306	ebi-a-GCST90017030	rs328312	T	A		|| id:ebi-a-GCST90017030	TRUE	reported	igd
genus	19	6928017	0.0985077	0.0203229	9.71673e-07	14306	ebi-a-GCST90017030	rs921925	A	C		|| id:ebi-a-GCST90017030	TRUE	reported	igd
genus	20	54192992	-0.0801344	0.017149	3.29041e-06	14306	ebi-a-GCST90017030	rs6092149	A	T		|| id:ebi-a-GCST90017030	TRUE	reported	igd
genus	1	58441860	-0.0935456	0.0193174	2.02428e-06	14306	ebi-a-GCST90017032	rs1187983	C	T		|| id:ebi-a-GCST90017032	TRUE	reported	igd
genus	1	211400180	0.0679323	0.015012	5.02736e-06	14306	ebi-a-GCST90017032	rs3125832	A	C		|| id:ebi-a-GCST90017032	TRUE	reported	igd
genus	3	166039765	-0.0634861	0.0136323	3.11279e-06	14306	ebi-a-GCST90017032	rs2863363	G	A		|| id:ebi-a-GCST90017032	TRUE	reported	igd
genus	6	132881664	-0.0649396	0.0131146	7.25371e-07	14306	ebi-a-GCST90017032	rs2842896	C	T		|| id:ebi-a-GCST90017032	TRUE	reported	igd
genus	10	12516924	0.0840769	0.0167551	6.28449e-07	14306	ebi-a-GCST90017032	rs2724813	G	A		|| id:ebi-a-GCST90017032	TRUE	reported	igd
genus	11	79518683	-0.126354	0.0272212	3.25912e-06	14306	ebi-a-GCST90017032	rs72948274	A	C		|| id:ebi-a-GCST90017032	TRUE	reported	igd
genus	11	45826561	0.124426	0.0248431	1.01163e-06	14306	ebi-a-GCST90017032	rs61884471	G	A		|| id:ebi-a-GCST90017032	TRUE	reported	igd
genus	13	86079090	0.119479	0.0271688	7.80171e-06	14306	ebi-a-GCST90017032	rs11620597	T	C		|| id:ebi-a-GCST90017032	TRUE	reported	igd
genus	14	21577837	-0.0952415	0.0216699	6.58082e-06	14306	ebi-a-GCST90017032	rs8006832	G	T		|| id:ebi-a-GCST90017032	TRUE	reported	igd
genus	16	5938448	-0.060618	0.0131551	4.14753e-06	14306	ebi-a-GCST90017032	rs11645029	G	C		|| id:ebi-a-GCST90017032	TRUE	reported	igd
genus	18	46255637	0.059681	0.0132289	6.60374e-06	14306	ebi-a-GCST90017032	rs12963345	C	G		|| id:ebi-a-GCST90017032	TRUE	reported	igd
genus	19	4542097	0.118845	0.0268423	6.86294e-06	14306	ebi-a-GCST90017032	rs146541147	G	A		|| id:ebi-a-GCST90017032	TRUE	reported	igd
genus	1	85585609	-0.10452	0.0225521	9.75708e-06	14306	ebi-a-GCST90017039	rs6657302	T	C		|| id:ebi-a-GCST90017039	TRUE	reported	igd
genus	2	38037203	-0.0715594	0.0156668	8.83385e-06	14306	ebi-a-GCST90017039	rs72893646	A	T		|| id:ebi-a-GCST90017039	TRUE	reported	igd
genus	3	191572365	0.10308	0.0222736	1.93059e-06	14306	ebi-a-GCST90017039	rs115602804	G	A		|| id:ebi-a-GCST90017039	TRUE	reported	igd
genus	3	52354847	0.186478	0.0405199	5.65484e-06	14306	ebi-a-GCST90017039	rs114567323	T	C		|| id:ebi-a-GCST90017039	TRUE	reported	igd
genus	5	169360155	0.0558784	0.0116625	1.71325e-06	14306	ebi-a-GCST90017039	rs3860755	G	C		|| id:ebi-a-GCST90017039	TRUE	reported	igd
genus	6	165969505	0.162824	0.0381863	8.86584e-06	14306	ebi-a-GCST90017039	rs11965579	G	C		|| id:ebi-a-GCST90017039	TRUE	reported	igd
genus	6	47368687	-0.0761961	0.0157042	1.93143e-06	14306	ebi-a-GCST90017039	rs4236095	A	G		|| id:ebi-a-GCST90017039	TRUE	reported	igd
genus	9	2217340	-0.0702667	0.0142249	5.7069e-07	14306	ebi-a-GCST90017039	rs60884758	C	T		|| id:ebi-a-GCST90017039	TRUE	reported	igd
genus	12	56396953	0.0888832	0.0200902	8.53631e-06	14306	ebi-a-GCST90017039	rs7298818	C	T		|| id:ebi-a-GCST90017039	TRUE	reported	igd
genus	16	7045276	-0.0500303	0.0111459	7.27411e-06	14306	ebi-a-GCST90017039	rs17141986	C	G		|| id:ebi-a-GCST90017039	TRUE	reported	igd
genus	1	216223782	0.16763	0.0379501	9.28346e-06	14306	ebi-a-GCST90017042	rs12069354	C	T		|| id:ebi-a-GCST90017042	TRUE	reported	igd
genus	1	75971700	0.137957	0.0302965	8.55342e-06	14306	ebi-a-GCST90017042	rs74592222	G	A		|| id:ebi-a-GCST90017042	TRUE	reported	igd
genus	2	33691809	-0.0895433	0.0188332	2.14166e-06	14306	ebi-a-GCST90017042	rs2054133	A	G		|| id:ebi-a-GCST90017042	TRUE	reported	igd
genus	3	17793504	0.181434	0.0319429	1.09883e-08	14306	ebi-a-GCST90017042	rs75754569	C	G		|| id:ebi-a-GCST90017042	TRUE	reported	igd
genus	4	35358594	0.121167	0.0225844	1.23637e-07	14306	ebi-a-GCST90017042	rs10031059	C	T		|| id:ebi-a-GCST90017042	TRUE	reported	igd
genus	6	99020289	-0.135311	0.0289742	1.14731e-06	14306	ebi-a-GCST90017042	rs6918730	A	G		|| id:ebi-a-GCST90017042	TRUE	reported	igd
genus	6	162239191	0.0976832	0.0214155	3.50768e-06	14306	ebi-a-GCST90017042	rs7766680	G	C		|| id:ebi-a-GCST90017042	TRUE	reported	igd
genus	9	104595848	-0.090152	0.018995	2.21958e-06	14306	ebi-a-GCST90017042	rs7033353	G	T		|| id:ebi-a-GCST90017042	TRUE	reported	igd
genus	10	78716030	-0.195611	0.0392217	1.32859e-06	14306	ebi-a-GCST90017042	rs11001941	G	A		|| id:ebi-a-GCST90017042	TRUE	reported	igd
genus	11	968356	-0.134304	0.0300423	5.74156e-06	14306	ebi-a-GCST90017042	rs72850165	T	C		|| id:ebi-a-GCST90017042	TRUE	reported	igd
genus	11	4019788	-0.17402	0.0374133	3.1299e-06	14306	ebi-a-GCST90017042	rs11030569	A	T		|| id:ebi-a-GCST90017042	TRUE	reported	igd
genus	13	91182556	0.200307	0.0387328	2.68838e-07	14306	ebi-a-GCST90017042	rs77681628	C	T		|| id:ebi-a-GCST90017042	TRUE	reported	igd
genus	14	57985112	0.110229	0.0237523	3.30088e-06	14306	ebi-a-GCST90017042	rs413827	G	A		|| id:ebi-a-GCST90017042	TRUE	reported	igd
genus	15	75073172	0.191797	0.0399832	1.83535e-06	14306	ebi-a-GCST90017042	rs34282744	G	C		|| id:ebi-a-GCST90017042	TRUE	reported	igd
genus	20	43118017	-0.14067	0.030628	6.98715e-06	14306	ebi-a-GCST90017042	rs36121075	A	G		|| id:ebi-a-GCST90017042	TRUE	reported	igd
genus	22	50973113	0.162018	0.0356813	3.21959e-06	14306	ebi-a-GCST90017042	rs5770862	T	C		|| id:ebi-a-GCST90017042	TRUE	reported	igd
genus	1	171903885	-0.0875276	0.0196779	5.08124e-06	14306	ebi-a-GCST90017047	rs16843578	C	T		|| id:ebi-a-GCST90017047	TRUE	reported	igd
genus	2	16066705	-0.129578	0.0280454	6.70795e-06	14306	ebi-a-GCST90017047	rs75987356	G	A		|| id:ebi-a-GCST90017047	TRUE	reported	igd
genus	5	57229635	-0.131039	0.0293815	7.95848e-06	14306	ebi-a-GCST90017047	rs114398731	G	C		|| id:ebi-a-GCST90017047	TRUE	reported	igd
genus	6	135411737	0.0722815	0.0162353	9.38469e-06	14306	ebi-a-GCST90017047	rs9389266	T	G		|| id:ebi-a-GCST90017047	TRUE	reported	igd
genus	7	106406824	-0.214911	0.0474739	8.52236e-06	14306	ebi-a-GCST90017047	rs28603357	T	C		|| id:ebi-a-GCST90017047	TRUE	reported	igd
genus	7	78136725	-0.0550261	0.0120835	5.87665e-06	14306	ebi-a-GCST90017047	rs34302036	G	A		|| id:ebi-a-GCST90017047	TRUE	reported	igd
genus	7	145760298	-0.0710048	0.0156654	4.65833e-06	14306	ebi-a-GCST90017047	rs62504452	A	G		|| id:ebi-a-GCST90017047	TRUE	reported	igd
genus	7	5319387	-0.0622202	0.0127675	1.17009e-06	14306	ebi-a-GCST90017047	rs10279978	A	G		|| id:ebi-a-GCST90017047	TRUE	reported	igd
genus	8	5088054	-0.190644	0.0421065	5.06559e-06	14306	ebi-a-GCST90017047	rs75200530	T	G		|| id:ebi-a-GCST90017047	TRUE	reported	igd
genus	10	17019559	0.092888	0.0171454	3.99595e-08	14306	ebi-a-GCST90017047	rs61841503	G	A		|| id:ebi-a-GCST90017047	TRUE	reported	igd
genus	11	133834657	0.0919112	0.0205738	6.98361e-06	14306	ebi-a-GCST90017047	rs7109293	A	G		|| id:ebi-a-GCST90017047	TRUE	reported	igd
genus	11	99665050	-0.0726779	0.0158263	6.48649e-06	14306	ebi-a-GCST90017047	rs11221428	T	C		|| id:ebi-a-GCST90017047	TRUE	reported	igd
genus	13	88725540	-0.094406	0.0208544	7.3697e-06	14306	ebi-a-GCST90017047	rs77702691	A	G		|| id:ebi-a-GCST90017047	TRUE	reported	igd
genus	13	32720756	0.0580018	0.0127495	5.75692e-06	14306	ebi-a-GCST90017047	rs9567264	C	T		|| id:ebi-a-GCST90017047	TRUE	reported	igd
genus	1	240503826	0.11614	0.0243083	1.66054e-06	14306	ebi-a-GCST90017050	rs79968172	G	A		|| id:ebi-a-GCST90017050	TRUE	reported	igd
genus	2	5548605	0.0554234	0.0125423	8.57946e-06	14306	ebi-a-GCST90017050	rs792058	G	A		|| id:ebi-a-GCST90017050	TRUE	reported	igd
genus	4	36478011	0.0720077	0.0165387	8.99146e-06	14306	ebi-a-GCST90017050	rs35362464	C	A		|| id:ebi-a-GCST90017050	TRUE	reported	igd
genus	7	101271282	0.058665	0.013208	7.28887e-06	14306	ebi-a-GCST90017050	rs73176030	T	C		|| id:ebi-a-GCST90017050	TRUE	reported	igd
genus	8	79766499	0.0625299	0.0137876	4.64836e-06	14306	ebi-a-GCST90017050	rs11992182	A	C		|| id:ebi-a-GCST90017050	TRUE	reported	igd
genus	10	128214403	-0.166823	0.0376681	9.15946e-06	14306	ebi-a-GCST90017050	rs116969552	A	G		|| id:ebi-a-GCST90017050	TRUE	reported	igd
genus	10	132651293	-0.097606	0.0216072	3.47144e-06	14306	ebi-a-GCST90017050	rs10829821	T	C		|| id:ebi-a-GCST90017050	TRUE	reported	igd
genus	11	86179076	0.13498	0.0310715	3.39414e-06	14306	ebi-a-GCST90017050	rs663262	C	T		|| id:ebi-a-GCST90017050	TRUE	reported	igd
genus	11	40289063	0.0736533	0.0153163	1.29587e-06	14306	ebi-a-GCST90017050	rs77193512	A	G		|| id:ebi-a-GCST90017050	TRUE	reported	igd
genus	13	111703249	-0.0804138	0.0176692	7.10133e-06	14306	ebi-a-GCST90017050	rs9555756	A	C		|| id:ebi-a-GCST90017050	TRUE	reported	igd
genus	14	20954661	0.0999189	0.0197169	2.53653e-07	14306	ebi-a-GCST90017050	rs1756364	G	T		|| id:ebi-a-GCST90017050	TRUE	reported	igd
genus	14	56938952	0.200894	0.0406434	1.07696e-06	14306	ebi-a-GCST90017050	rs71414120	T	G		|| id:ebi-a-GCST90017050	TRUE	reported	igd
genus	15	61047117	-0.105422	0.0237274	9.11612e-06	14306	ebi-a-GCST90017050	rs1871858	C	G		|| id:ebi-a-GCST90017050	TRUE	reported	igd
genus	16	72136154	0.15913	0.0322283	1.08648e-06	14306	ebi-a-GCST90017050	rs61060922	T	G		|| id:ebi-a-GCST90017050	TRUE	reported	igd
genus	18	76018244	0.135604	0.0295174	4.9537e-06	14306	ebi-a-GCST90017050	rs72991535	T	G		|| id:ebi-a-GCST90017050	TRUE	reported	igd
genus	19	10115515	0.118994	0.026487	9.30208e-06	14306	ebi-a-GCST90017050	rs67479537	T	C		|| id:ebi-a-GCST90017050	TRUE	reported	igd
genus	19	49209339	0.0554866	0.0122755	6.40206e-06	14306	ebi-a-GCST90017050	rs2548459	C	T		|| id:ebi-a-GCST90017050	TRUE	reported	igd
genus	1	100248591	0.100174	0.024	9.0494e-06	14306	ebi-a-GCST90017052	rs6681678	T	C		|| id:ebi-a-GCST90017052	TRUE	reported	igd
genus	1	157338888	-0.0863422	0.0169937	3.66277e-07	14306	ebi-a-GCST90017052	rs11586410	G	A		|| id:ebi-a-GCST90017052	TRUE	reported	igd
genus	2	239087912	-0.0527684	0.0115053	4.87237e-06	14306	ebi-a-GCST90017052	rs12731	A	G		|| id:ebi-a-GCST90017052	TRUE	reported	igd
genus	2	235430299	-0.175266	0.0372779	3.59153e-06	14306	ebi-a-GCST90017052	rs114244418	C	G		|| id:ebi-a-GCST90017052	TRUE	reported	igd
genus	2	141897042	0.107739	0.0233638	3.23139e-06	14306	ebi-a-GCST90017052	rs7573569	T	C		|| id:ebi-a-GCST90017052	TRUE	reported	igd
genus	3	84725039	-0.0574623	0.012594	8.69221e-06	14306	ebi-a-GCST90017052	rs13087692	G	T		|| id:ebi-a-GCST90017052	TRUE	reported	igd
genus	3	26509287	-0.133769	0.0295196	4.72498e-06	14306	ebi-a-GCST90017052	rs147475196	A	G		|| id:ebi-a-GCST90017052	TRUE	reported	igd
genus	4	159932022	0.0553003	0.0119397	3.43005e-06	14306	ebi-a-GCST90017052	rs12642039	C	T		|| id:ebi-a-GCST90017052	TRUE	reported	igd
genus	5	35288938	-0.0925071	0.0203674	4.89024e-06	14306	ebi-a-GCST90017052	rs35559912	T	C		|| id:ebi-a-GCST90017052	TRUE	reported	igd
genus	5	123846318	-0.0533858	0.0120035	6.58977e-06	14306	ebi-a-GCST90017052	rs11241747	T	C		|| id:ebi-a-GCST90017052	TRUE	reported	igd
genus	7	132042135	-0.109257	0.0227458	2.19796e-06	14306	ebi-a-GCST90017052	rs73158814	C	G		|| id:ebi-a-GCST90017052	TRUE	reported	igd
genus	12	78373555	-0.0873312	0.0194886	4.71639e-06	14306	ebi-a-GCST90017052	rs34576931	G	C		|| id:ebi-a-GCST90017052	TRUE	reported	igd
genus	16	24073806	0.0615389	0.0137612	6.58461e-06	14306	ebi-a-GCST90017052	rs62027366	T	C		|| id:ebi-a-GCST90017052	TRUE	reported	igd
genus	20	18030357	-0.1083	0.0230708	4.55187e-06	14306	ebi-a-GCST90017052	rs4814689	C	T		|| id:ebi-a-GCST90017052	TRUE	reported	igd
genus	22	49796014	0.0587521	0.0119155	8.15192e-07	14306	ebi-a-GCST90017052	rs136761	A	G		|| id:ebi-a-GCST90017052	TRUE	reported	igd
genus	22	17793012	-0.0811302	0.0157621	2.35185e-07	14306	ebi-a-GCST90017052	rs5994253	A	G		|| id:ebi-a-GCST90017052	TRUE	reported	igd
genus	1	13794594	-0.0551473	0.0120346	4.38137e-06	14306	ebi-a-GCST90017054	rs3013089	G	A		|| id:ebi-a-GCST90017054	TRUE	reported	igd
genus	2	37905976	-0.0672094	0.0143309	4.15547e-06	14306	ebi-a-GCST90017054	rs10490280	C	T		|| id:ebi-a-GCST90017054	TRUE	reported	igd
genus	2	205238716	0.102523	0.0200204	7.86231e-07	14306	ebi-a-GCST90017054	rs6759615	A	G		|| id:ebi-a-GCST90017054	TRUE	reported	igd
genus	3	41982393	-0.115348	0.0249601	7.59259e-06	14306	ebi-a-GCST90017054	rs78720113	A	G		|| id:ebi-a-GCST90017054	TRUE	reported	igd
genus	6	105781538	0.0769231	0.017045	4.82125e-06	14306	ebi-a-GCST90017054	rs4532474	G	A		|| id:ebi-a-GCST90017054	TRUE	reported	igd
genus	7	51541468	-0.169857	0.0318768	1.50952e-07	14306	ebi-a-GCST90017054	rs73341549	T	C		|| id:ebi-a-GCST90017054	TRUE	reported	igd
genus	7	97348436	0.0546625	0.0120823	5.78376e-06	14306	ebi-a-GCST90017054	rs2523124	C	T		|| id:ebi-a-GCST90017054	TRUE	reported	igd
genus	8	82026852	-0.0634463	0.0134741	3.29337e-06	14306	ebi-a-GCST90017054	rs4452755	A	C		|| id:ebi-a-GCST90017054	TRUE	reported	igd
genus	9	134416970	-0.0925653	0.0191203	1.66882e-06	14306	ebi-a-GCST90017054	rs11243416	T	C		|| id:ebi-a-GCST90017054	TRUE	reported	igd
genus	12	75496463	0.0727604	0.0155716	1.6251e-06	14306	ebi-a-GCST90017054	rs11613919	G	T		|| id:ebi-a-GCST90017054	TRUE	reported	igd
genus	13	31520446	0.117283	0.025971	7.21157e-06	14306	ebi-a-GCST90017054	rs73165080	T	A		|| id:ebi-a-GCST90017054	TRUE	reported	igd
genus	15	35071718	-0.062527	0.0131259	2.21707e-06	14306	ebi-a-GCST90017054	rs16959793	A	C		|| id:ebi-a-GCST90017054	TRUE	reported	igd
genus	18	46485154	-0.0553742	0.0122659	6.5435e-06	14306	ebi-a-GCST90017054	rs4629039	A	T		|| id:ebi-a-GCST90017054	TRUE	reported	igd
genus	19	49209851	0.0586696	0.0118369	7.83177e-07	14306	ebi-a-GCST90017054	rs646327	G	A		|| id:ebi-a-GCST90017054	TRUE	reported	igd
genus	22	25292719	-0.0577655	0.0130645	9.7212e-06	14306	ebi-a-GCST90017054	rs139730	G	C		|| id:ebi-a-GCST90017054	TRUE	reported	igd
genus	1	103732214	0.133972	0.0257416	2.09426e-07	14306	ebi-a-GCST90017055	rs12125734	G	T		|| id:ebi-a-GCST90017055	TRUE	reported	igd
genus	1	18676399	0.078587	0.018003	9.43127e-06	14306	ebi-a-GCST90017055	rs550351	A	C		|| id:ebi-a-GCST90017055	TRUE	reported	igd
genus	2	239846337	-0.075914	0.0170308	8.1197e-06	14306	ebi-a-GCST90017055	rs7569771	A	G		|| id:ebi-a-GCST90017055	TRUE	reported	igd
genus	3	197683751	-0.0859927	0.0188671	5.38828e-06	14306	ebi-a-GCST90017055	rs9818949	T	G		|| id:ebi-a-GCST90017055	TRUE	reported	igd
genus	3	54427795	0.0849743	0.0157451	7.91061e-08	14306	ebi-a-GCST90017055	rs6769553	A	G		|| id:ebi-a-GCST90017055	TRUE	reported	igd
genus	3	169966722	-0.0757474	0.0162475	4.52054e-06	14306	ebi-a-GCST90017055	rs511258	G	A		|| id:ebi-a-GCST90017055	TRUE	reported	igd
genus	6	2119329	-0.0797959	0.0177639	6.11575e-06	14306	ebi-a-GCST90017055	rs3800154	A	C		|| id:ebi-a-GCST90017055	TRUE	reported	igd
genus	6	132887921	-0.0707825	0.0161381	9.18015e-06	14306	ebi-a-GCST90017055	rs11961899	G	A		|| id:ebi-a-GCST90017055	TRUE	reported	igd
genus	7	24791998	0.0689452	0.0153649	8.19993e-06	14306	ebi-a-GCST90017055	rs2248146	T	C		|| id:ebi-a-GCST90017055	TRUE	reported	igd
genus	8	139253064	0.116125	0.025946	5.80805e-06	14306	ebi-a-GCST90017055	rs872501	G	A		|| id:ebi-a-GCST90017055	TRUE	reported	igd
genus	9	7317307	0.095976	0.0214554	7.04482e-06	14306	ebi-a-GCST90017055	rs10976229	T	G		|| id:ebi-a-GCST90017055	TRUE	reported	igd
genus	11	15771251	-0.0786157	0.0179592	7.09186e-06	14306	ebi-a-GCST90017055	rs7123615	C	G		|| id:ebi-a-GCST90017055	TRUE	reported	igd
genus	1	187906034	-0.0586677	0.0125277	2.81022e-06	14306	ebi-a-GCST90017056	rs7555878	G	A		|| id:ebi-a-GCST90017056	TRUE	reported	igd
genus	2	198122357	-0.146604	0.0316034	3.21855e-06	14306	ebi-a-GCST90017056	rs114279581	A	G		|| id:ebi-a-GCST90017056	TRUE	reported	igd
genus	2	239509030	0.0782349	0.0176458	8.81455e-06	14306	ebi-a-GCST90017056	rs7586445	G	A		|| id:ebi-a-GCST90017056	TRUE	reported	igd
genus	4	7302344	-0.0755811	0.0168226	8.17354e-06	14306	ebi-a-GCST90017056	rs10937802	A	G		|| id:ebi-a-GCST90017056	TRUE	reported	igd
genus	5	32755085	0.158082	0.0319586	9.28111e-07	14306	ebi-a-GCST90017056	rs60081663	C	G		|| id:ebi-a-GCST90017056	TRUE	reported	igd
genus	5	154003091	0.0599163	0.0130836	4.80773e-06	14306	ebi-a-GCST90017056	rs7449320	C	A		|| id:ebi-a-GCST90017056	TRUE	reported	igd
genus	7	18026604	-0.0577628	0.011412	4.29804e-07	14306	ebi-a-GCST90017056	rs10950694	C	T		|| id:ebi-a-GCST90017056	TRUE	reported	igd
genus	8	3099727	0.0686153	0.0146252	3.75405e-06	14306	ebi-a-GCST90017056	rs35166120	G	C		|| id:ebi-a-GCST90017056	TRUE	reported	igd
genus	10	62662781	-0.073644	0.015548	3.53843e-06	14306	ebi-a-GCST90017056	rs2893871	G	A		|| id:ebi-a-GCST90017056	TRUE	reported	igd
genus	10	4240906	0.087067	0.0197179	5.3571e-06	14306	ebi-a-GCST90017056	rs72776570	C	A		|| id:ebi-a-GCST90017056	TRUE	reported	igd
genus	11	27747671	0.066635	0.0144356	3.10277e-06	14306	ebi-a-GCST90017056	rs12288512	A	G		|| id:ebi-a-GCST90017056	TRUE	reported	igd
genus	12	47384118	0.121548	0.0279546	7.37038e-06	14306	ebi-a-GCST90017056	rs55793120	T	C		|| id:ebi-a-GCST90017056	TRUE	reported	igd
genus	14	94630731	-0.0654843	0.0143973	4.11169e-06	14306	ebi-a-GCST90017056	rs10873449	C	T		|| id:ebi-a-GCST90017056	TRUE	reported	igd
genus	15	68705697	0.123012	0.0286671	7.46311e-06	14306	ebi-a-GCST90017056	rs898577	C	T		|| id:ebi-a-GCST90017056	TRUE	reported	igd
genus	17	7034575	0.0692909	0.0148712	2.59896e-06	14306	ebi-a-GCST90017056	rs394449	A	T		|| id:ebi-a-GCST90017056	TRUE	reported	igd
genus	18	22575871	0.0677322	0.0144525	2.41024e-06	14306	ebi-a-GCST90017056	rs12458218	T	C		|| id:ebi-a-GCST90017056	TRUE	reported	igd
genus	20	16312851	0.188685	0.0386484	6.04728e-07	14306	ebi-a-GCST90017056	rs34781347	G	A		|| id:ebi-a-GCST90017056	TRUE	reported	igd
genus	1	202299085	0.0915623	0.019936	3.28246e-06	14306	ebi-a-GCST90017057	rs4079028	C	T		|| id:ebi-a-GCST90017057	TRUE	reported	igd
genus	1	39983022	-0.138137	0.0292072	1.94241e-06	14306	ebi-a-GCST90017057	rs61779334	G	C		|| id:ebi-a-GCST90017057	TRUE	reported	igd
genus	2	66396776	0.139274	0.0315794	9.80844e-06	14306	ebi-a-GCST90017057	rs138460696	A	G		|| id:ebi-a-GCST90017057	TRUE	reported	igd
genus	2	75512668	-0.089048	0.0192989	4.87742e-06	14306	ebi-a-GCST90017057	rs2192926	A	G		|| id:ebi-a-GCST90017057	TRUE	reported	igd
genus	4	7426937	-0.0774649	0.0168937	4.75488e-06	14306	ebi-a-GCST90017057	rs12508214	C	T		|| id:ebi-a-GCST90017057	TRUE	reported	igd
genus	6	51803869	-0.0928893	0.0208035	7.97701e-06	14306	ebi-a-GCST90017057	rs113006825	T	C		|| id:ebi-a-GCST90017057	TRUE	reported	igd
genus	6	78106701	-0.084033	0.0174757	1.56246e-06	14306	ebi-a-GCST90017057	rs4708333	T	G		|| id:ebi-a-GCST90017057	TRUE	reported	igd
genus	7	32001710	0.0732099	0.0166777	8.13055e-06	14306	ebi-a-GCST90017057	rs6952765	G	A		|| id:ebi-a-GCST90017057	TRUE	reported	igd
genus	12	12970792	-0.0816464	0.017472	3.12486e-06	14306	ebi-a-GCST90017057	rs2058609	G	A		|| id:ebi-a-GCST90017057	TRUE	reported	igd
genus	13	106650093	-0.0897823	0.0200739	7.00842e-06	14306	ebi-a-GCST90017057	rs9558661	T	C		|| id:ebi-a-GCST90017057	TRUE	reported	igd
genus	14	39306809	-0.135936	0.0244857	4.42181e-08	14306	ebi-a-GCST90017057	rs8009993	G	C		|| id:ebi-a-GCST90017057	TRUE	reported	igd
genus	16	1979831	0.17702	0.0375113	9.0099e-06	14306	ebi-a-GCST90017057	rs758191	T	G		|| id:ebi-a-GCST90017057	TRUE	reported	igd
genus	17	32786955	-0.130842	0.0262478	1.13287e-06	14306	ebi-a-GCST90017057	rs1550196	A	G		|| id:ebi-a-GCST90017057	TRUE	reported	igd
genus	19	52399401	0.120989	0.0277317	9.67208e-06	14306	ebi-a-GCST90017057	rs78410648	A	G		|| id:ebi-a-GCST90017057	TRUE	reported	igd
genus	4	40707798	0.05695	0.0126502	6.8019e-06	14306	ebi-a-GCST90017058	rs7441445	T	C		|| id:ebi-a-GCST90017058	TRUE	reported	igd
genus	4	31057482	-0.166211	0.0367938	6.43028e-06	14306	ebi-a-GCST90017058	rs73218807	G	A		|| id:ebi-a-GCST90017058	TRUE	reported	igd
genus	6	104728618	0.0592304	0.0125917	2.85384e-06	14306	ebi-a-GCST90017058	rs2820282	C	A		|| id:ebi-a-GCST90017058	TRUE	reported	igd
genus	7	16349864	-0.0585718	0.0124994	2.84165e-06	14306	ebi-a-GCST90017058	rs6958419	C	T		|| id:ebi-a-GCST90017058	TRUE	reported	igd
genus	9	135968557	-0.0588161	0.0124671	2.36537e-06	14306	ebi-a-GCST90017058	rs682403	A	G		|| id:ebi-a-GCST90017058	TRUE	reported	igd
genus	11	130676996	0.0631351	0.0137953	4.99425e-06	14306	ebi-a-GCST90017058	rs7935775	T	A		|| id:ebi-a-GCST90017058	TRUE	reported	igd
genus	15	36607072	-0.0693743	0.0147926	3.20915e-06	14306	ebi-a-GCST90017058	rs35506912	G	C		|| id:ebi-a-GCST90017058	TRUE	reported	igd
genus	16	5233941	-0.0670855	0.0144415	4.87304e-06	14306	ebi-a-GCST90017058	rs12597105	A	G		|| id:ebi-a-GCST90017058	TRUE	reported	igd
genus	1	241789757	-0.11504	0.0260137	8.74138e-06	14306	ebi-a-GCST90017062	rs3819978	C	T		|| id:ebi-a-GCST90017062	TRUE	reported	igd
genus	1	12778598	0.0709997	0.0162766	9.27662e-06	14306	ebi-a-GCST90017062	rs3000856	A	T		|| id:ebi-a-GCST90017062	TRUE	reported	igd
genus	2	10533921	0.0527654	0.0112619	2.55611e-06	14306	ebi-a-GCST90017062	rs7583465	C	T		|| id:ebi-a-GCST90017062	TRUE	reported	igd
genus	2	181882879	0.0519509	0.0116306	8.09245e-06	14306	ebi-a-GCST90017062	rs10167839	A	G		|| id:ebi-a-GCST90017062	TRUE	reported	igd
genus	2	119481372	0.132764	0.0299816	8.82612e-06	14306	ebi-a-GCST90017062	rs4849717	T	A		|| id:ebi-a-GCST90017062	TRUE	reported	igd
genus	2	65925212	0.167497	0.0367639	5.11423e-06	14306	ebi-a-GCST90017062	rs78613526	G	A		|| id:ebi-a-GCST90017062	TRUE	reported	igd
genus	5	15944587	0.125038	0.0279411	5.23106e-06	14306	ebi-a-GCST90017062	rs78572139	G	A		|| id:ebi-a-GCST90017062	TRUE	reported	igd
genus	8	144596903	-0.0734114	0.0161398	4.72683e-06	14306	ebi-a-GCST90017062	rs11783695	G	T		|| id:ebi-a-GCST90017062	TRUE	reported	igd
genus	10	65870347	-0.0762002	0.0174689	8.38262e-06	14306	ebi-a-GCST90017062	rs10995816	C	G		|| id:ebi-a-GCST90017062	TRUE	reported	igd
genus	11	45688595	0.0640277	0.0110059	5.29127e-09	14306	ebi-a-GCST90017062	rs10769159	C	G		|| id:ebi-a-GCST90017062	TRUE	reported	igd
genus	11	114023573	0.0829505	0.0170891	6.47978e-07	14306	ebi-a-GCST90017062	rs7117576	A	G		|| id:ebi-a-GCST90017062	TRUE	reported	igd
genus	15	55439182	-0.0535262	0.0115885	3.38361e-06	14306	ebi-a-GCST90017062	rs6493760	T	C		|| id:ebi-a-GCST90017062	TRUE	reported	igd
genus	17	71256018	0.0999271	0.0211728	1.96336e-06	14306	ebi-a-GCST90017062	rs17781867	C	T		|| id:ebi-a-GCST90017062	TRUE	reported	igd
genus	20	13258628	-0.0607052	0.013425	5.05918e-06	14306	ebi-a-GCST90017062	rs6105066	T	C		|| id:ebi-a-GCST90017062	TRUE	reported	igd
genus	1	108074445	-0.063193	0.0142275	9.78949e-06	14306	ebi-a-GCST90017063	rs12406309	A	C		|| id:ebi-a-GCST90017063	TRUE	reported	igd
genus	2	182656416	0.199648	0.0438453	3.62928e-06	14306	ebi-a-GCST90017063	rs2368224	T	G		|| id:ebi-a-GCST90017063	TRUE	reported	igd
genus	2	238103439	-0.0665937	0.0140168	2.142e-06	14306	ebi-a-GCST90017063	rs12986628	T	C		|| id:ebi-a-GCST90017063	TRUE	reported	igd
genus	3	173040924	0.0618344	0.0129031	1.98052e-06	14306	ebi-a-GCST90017063	rs7635831	G	A		|| id:ebi-a-GCST90017063	TRUE	reported	igd
genus	3	106664363	-0.192815	0.0392045	3.31184e-07	14306	ebi-a-GCST90017063	rs78120384	A	G		|| id:ebi-a-GCST90017063	TRUE	reported	igd
genus	4	24655463	-0.0523503	0.0117119	6.78938e-06	14306	ebi-a-GCST90017063	rs61791565	T	C		|| id:ebi-a-GCST90017063	TRUE	reported	igd
genus	4	4268322	-0.102822	0.0235087	9.42128e-06	14306	ebi-a-GCST90017063	rs7693984	G	A		|| id:ebi-a-GCST90017063	TRUE	reported	igd
genus	7	16804578	0.0546114	0.0120077	5.79923e-06	14306	ebi-a-GCST90017063	rs4400279	A	G		|| id:ebi-a-GCST90017063	TRUE	reported	igd
genus	7	151435722	0.0842356	0.0184893	5.28433e-06	14306	ebi-a-GCST90017063	rs1819812	G	T		|| id:ebi-a-GCST90017063	TRUE	reported	igd
genus	9	79919385	0.0865522	0.0189141	8.0059e-06	14306	ebi-a-GCST90017063	rs55707116	C	A		|| id:ebi-a-GCST90017063	TRUE	reported	igd
genus	9	137557890	0.0723875	0.0160787	4.18177e-06	14306	ebi-a-GCST90017063	rs58681734	A	G		|| id:ebi-a-GCST90017063	TRUE	reported	igd
genus	11	12148588	0.0836825	0.0176445	3.95294e-06	14306	ebi-a-GCST90017063	rs75140805	T	G		|| id:ebi-a-GCST90017063	TRUE	reported	igd
genus	13	62067781	0.0568439	0.0122325	4.22114e-06	14306	ebi-a-GCST90017063	rs2997412	G	A		|| id:ebi-a-GCST90017063	TRUE	reported	igd
genus	18	33456427	0.0837001	0.0182263	5.40132e-06	14306	ebi-a-GCST90017063	rs4799823	C	T		|| id:ebi-a-GCST90017063	TRUE	reported	igd
genus	18	862477	-0.0522093	0.0116382	7.58892e-06	14306	ebi-a-GCST90017063	rs2846589	T	G		|| id:ebi-a-GCST90017063	TRUE	reported	igd
genus	1	115168097	0.0901946	0.0196476	3.09628e-06	14306	ebi-a-GCST90017065	rs12136548	C	T		|| id:ebi-a-GCST90017065	TRUE	reported	igd
genus	2	122096018	-0.105045	0.0229588	2.73703e-06	14306	ebi-a-GCST90017065	rs934940	A	C		|| id:ebi-a-GCST90017065	TRUE	reported	igd
genus	2	36259341	-0.0846861	0.0187936	7.11803e-06	14306	ebi-a-GCST90017065	rs12989336	G	A		|| id:ebi-a-GCST90017065	TRUE	reported	igd
genus	2	144700007	0.185289	0.0396295	3.49526e-06	14306	ebi-a-GCST90017065	rs62167033	T	C		|| id:ebi-a-GCST90017065	TRUE	reported	igd
genus	3	146290310	0.144445	0.0326618	6.62995e-06	14306	ebi-a-GCST90017065	rs78399089	T	C		|| id:ebi-a-GCST90017065	TRUE	reported	igd
genus	3	66701616	0.0849233	0.0176643	1.66027e-06	14306	ebi-a-GCST90017065	rs9872758	T	C		|| id:ebi-a-GCST90017065	TRUE	reported	igd
genus	4	190110710	0.0904997	0.0203544	9.11633e-06	14306	ebi-a-GCST90017065	rs4388134	T	C		|| id:ebi-a-GCST90017065	TRUE	reported	igd
genus	5	18662686	-0.127377	0.0233883	5.61009e-08	14306	ebi-a-GCST90017065	rs13163520	G	A		|| id:ebi-a-GCST90017065	TRUE	reported	igd
genus	8	129224680	0.0909965	0.018351	7.40952e-07	14306	ebi-a-GCST90017065	rs2909242	A	C		|| id:ebi-a-GCST90017065	TRUE	reported	igd
genus	9	135838591	0.11599	0.0249099	2.6652e-06	14306	ebi-a-GCST90017065	rs3124783	G	A		|| id:ebi-a-GCST90017065	TRUE	reported	igd
genus	10	6512581	0.114673	0.0250653	6.94864e-06	14306	ebi-a-GCST90017065	rs11597105	A	G		|| id:ebi-a-GCST90017065	TRUE	reported	igd
genus	16	433078	-0.139804	0.0318253	5.00876e-06	14306	ebi-a-GCST90017065	rs11864644	T	C		|| id:ebi-a-GCST90017065	TRUE	reported	igd
genus	2	206654123	-0.109619	0.0247785	8.90574e-06	14306	ebi-a-GCST90017068	rs1990708	A	C		|| id:ebi-a-GCST90017068	TRUE	reported	igd
genus	2	220831701	-0.0774679	0.017084	6.03949e-06	14306	ebi-a-GCST90017068	rs13383270	C	G		|| id:ebi-a-GCST90017068	TRUE	reported	igd
genus	5	127861692	0.185519	0.0400881	8.05434e-06	14306	ebi-a-GCST90017068	rs10036909	C	T		|| id:ebi-a-GCST90017068	TRUE	reported	igd
genus	9	34332382	0.081327	0.0171154	2.63463e-06	14306	ebi-a-GCST90017068	rs11787826	C	A		|| id:ebi-a-GCST90017068	TRUE	reported	igd
genus	13	19489214	0.0819494	0.0172241	2.0332e-06	14306	ebi-a-GCST90017068	rs57512504	T	A		|| id:ebi-a-GCST90017068	TRUE	reported	igd
genus	14	34431996	0.0782258	0.0176841	9.50298e-06	14306	ebi-a-GCST90017068	rs2017373	C	T		|| id:ebi-a-GCST90017068	TRUE	reported	igd
genus	17	74949284	-0.0822462	0.0175721	2.41535e-06	14306	ebi-a-GCST90017068	rs72887800	T	A		|| id:ebi-a-GCST90017068	TRUE	reported	igd
genus	17	48379615	-0.079173	0.0170421	4.18013e-06	14306	ebi-a-GCST90017068	rs7225245	A	G		|| id:ebi-a-GCST90017068	TRUE	reported	igd
genus	2	63366962	0.169883	0.0315478	7.00971e-08	14306	ebi-a-GCST90017074	rs149744580	A	G		|| id:ebi-a-GCST90017074	TRUE	reported	igd
genus	5	95717619	0.131186	0.027197	2.5537e-06	14306	ebi-a-GCST90017074	rs4869133	G	A		|| id:ebi-a-GCST90017074	TRUE	reported	igd
genus	5	170048048	0.0710364	0.015343	3.45669e-06	14306	ebi-a-GCST90017074	rs2221441	G	C		|| id:ebi-a-GCST90017074	TRUE	reported	igd
genus	6	126111881	-0.120957	0.02683	5.31912e-06	14306	ebi-a-GCST90017074	rs3734633	G	A		|| id:ebi-a-GCST90017074	TRUE	reported	igd
genus	7	130972179	-0.115115	0.0240708	2.8053e-06	14306	ebi-a-GCST90017074	rs55756211	T	C		|| id:ebi-a-GCST90017074	TRUE	reported	igd
genus	8	26027842	0.0759019	0.0165764	5.63313e-06	14306	ebi-a-GCST90017074	rs2952020	A	G		|| id:ebi-a-GCST90017074	TRUE	reported	igd
genus	11	1681862	-0.0858591	0.0185778	4.13676e-06	14306	ebi-a-GCST90017074	rs61265175	G	C		|| id:ebi-a-GCST90017074	TRUE	reported	igd
genus	12	12242455	-0.104751	0.0226997	2.30978e-06	14306	ebi-a-GCST90017074	rs11054680	T	C		|| id:ebi-a-GCST90017074	TRUE	reported	igd
genus	15	92605098	-0.0710377	0.0155221	5.46072e-06	14306	ebi-a-GCST90017074	rs4247078	G	C		|| id:ebi-a-GCST90017074	TRUE	reported	igd
genus	16	10181248	0.0950891	0.0203433	3.26625e-06	14306	ebi-a-GCST90017074	rs11649454	G	C		|| id:ebi-a-GCST90017074	TRUE	reported	igd
genus	16	49826299	-0.0731428	0.0160172	5.7666e-06	14306	ebi-a-GCST90017074	rs7199484	G	A		|| id:ebi-a-GCST90017074	TRUE	reported	igd
genus	17	43117476	0.110861	0.0225598	8.66603e-07	14306	ebi-a-GCST90017074	rs12603364	T	C		|| id:ebi-a-GCST90017074	TRUE	reported	igd
genus	19	11864932	-0.111689	0.0248436	7.37106e-06	14306	ebi-a-GCST90017074	rs11666533	C	T		|| id:ebi-a-GCST90017074	TRUE	reported	igd
genus	21	36929643	-0.0959995	0.0208261	3.95585e-06	14306	ebi-a-GCST90017074	rs2834977	T	C		|| id:ebi-a-GCST90017074	TRUE	reported	igd
genus	1	105422565	-0.0655855	0.0142236	4.0635e-06	14306	ebi-a-GCST90016961	rs11184341	C	G		|| id:ebi-a-GCST90016961	TRUE	reported	igd
genus	1	41074472	-0.0760539	0.0167769	6.32121e-06	14306	ebi-a-GCST90016961	rs61779207	G	A		|| id:ebi-a-GCST90016961	TRUE	reported	igd
genus	4	95027272	0.0750473	0.0150184	6.58385e-07	14306	ebi-a-GCST90016961	rs11729256	T	C		|| id:ebi-a-GCST90016961	TRUE	reported	igd
genus	4	100544188	0.112623	0.0236434	1.4802e-06	14306	ebi-a-GCST90016961	rs74542928	T	C		|| id:ebi-a-GCST90016961	TRUE	reported	igd
genus	6	56341481	-0.0703407	0.0147133	2.59884e-06	14306	ebi-a-GCST90016961	rs9349825	A	G		|| id:ebi-a-GCST90016961	TRUE	reported	igd
genus	10	5064327	-0.0685454	0.0147701	2.99799e-06	14306	ebi-a-GCST90016961	rs4242783	A	G		|| id:ebi-a-GCST90016961	TRUE	reported	igd
genus	11	130280667	-0.0649225	0.0135934	1.1036e-06	14306	ebi-a-GCST90016961	rs4936098	G	A		|| id:ebi-a-GCST90016961	TRUE	reported	igd
genus	12	130309670	0.0911199	0.0196748	3.39234e-06	14306	ebi-a-GCST90016961	rs111862613	T	C		|| id:ebi-a-GCST90016961	TRUE	reported	igd
genus	15	97570657	0.061772	0.0130954	2.2648e-06	14306	ebi-a-GCST90016961	rs12908520	G	A		|| id:ebi-a-GCST90016961	TRUE	reported	igd
genus	16	81063149	-0.0745352	0.0156201	2.71569e-06	14306	ebi-a-GCST90016961	rs2602429	T	C		|| id:ebi-a-GCST90016961	TRUE	reported	igd
genus	18	49473635	0.204406	0.0431629	3.01141e-06	14306	ebi-a-GCST90016961	rs117107102	A	G		|| id:ebi-a-GCST90016961	TRUE	reported	igd
genus	20	31867840	-0.0632957	0.0143777	9.17128e-06	14306	ebi-a-GCST90016961	rs941682	G	A		|| id:ebi-a-GCST90016961	TRUE	reported	igd
genus	1	234126516	0.126418	0.0282207	8.58361e-06	14306	ebi-a-GCST90016964	rs4364940	A	G		|| id:ebi-a-GCST90016964	TRUE	reported	igd
genus	3	152805600	0.119599	0.0259446	4.99057e-06	14306	ebi-a-GCST90016964	rs4680035	G	A		|| id:ebi-a-GCST90016964	TRUE	reported	igd
genus	3	79794395	0.125564	0.0280409	9.27129e-06	14306	ebi-a-GCST90016964	rs17380632	A	T		|| id:ebi-a-GCST90016964	TRUE	reported	igd
genus	4	189076705	-0.161506	0.0359102	7.93615e-06	14306	ebi-a-GCST90016964	rs58212166	A	G		|| id:ebi-a-GCST90016964	TRUE	reported	igd
genus	8	69994816	0.145669	0.0290678	9.63718e-07	14306	ebi-a-GCST90016964	rs12675596	G	T		|| id:ebi-a-GCST90016964	TRUE	reported	igd
genus	21	36053643	-0.138234	0.0308961	8.36758e-06	14306	ebi-a-GCST90016964	rs2154444	G	T		|| id:ebi-a-GCST90016964	TRUE	reported	igd
genus	21	40993008	-0.156037	0.0344392	8.84199e-06	14306	ebi-a-GCST90016964	rs34619204	G	A		|| id:ebi-a-GCST90016964	TRUE	reported	igd
genus	1	102960989	-0.0592004	0.0132244	6.73008e-06	14306	ebi-a-GCST90016968	rs1340391	T	C		|| id:ebi-a-GCST90016968	TRUE	reported	igd
genus	1	10644351	-0.0740746	0.0147633	1.79511e-06	14306	ebi-a-GCST90016968	rs11585893	A	G		|| id:ebi-a-GCST90016968	TRUE	reported	igd
genus	3	10593224	0.0538565	0.0105251	3.37909e-07	14306	ebi-a-GCST90016968	rs6795673	C	T		|| id:ebi-a-GCST90016968	TRUE	reported	igd
genus	3	77215327	-0.0488038	0.0107412	5.8626e-06	14306	ebi-a-GCST90016968	rs66710942	T	C		|| id:ebi-a-GCST90016968	TRUE	reported	igd
genus	3	62019400	-0.0528153	0.0117124	7.64945e-06	14306	ebi-a-GCST90016968	rs2366421	T	A		|| id:ebi-a-GCST90016968	TRUE	reported	igd
genus	6	29143451	0.0818398	0.0170319	1.2942e-06	14306	ebi-a-GCST90016968	rs28757219	T	A		|| id:ebi-a-GCST90016968	TRUE	reported	igd
genus	6	41519430	-0.059205	0.0131195	7.48497e-06	14306	ebi-a-GCST90016968	rs13207588	A	G		|| id:ebi-a-GCST90016968	TRUE	reported	igd
genus	9	112855426	-0.0607475	0.0129865	3.4209e-06	14306	ebi-a-GCST90016968	rs495004	C	G		|| id:ebi-a-GCST90016968	TRUE	reported	igd
genus	13	24910476	0.0604456	0.0129128	2.12711e-06	14306	ebi-a-GCST90016968	rs9507307	C	T		|| id:ebi-a-GCST90016968	TRUE	reported	igd
genus	14	22045949	-0.0782325	0.0167634	5.01822e-06	14306	ebi-a-GCST90016968	rs2023437	T	C		|| id:ebi-a-GCST90016968	TRUE	reported	igd
genus	19	24342250	0.0880978	0.0187002	2.68683e-06	14306	ebi-a-GCST90016968	rs17619981	T	G		|| id:ebi-a-GCST90016968	TRUE	reported	igd
genus	20	58605432	0.0812515	0.0164479	6.80973e-07	14306	ebi-a-GCST90016968	rs66474973	G	T		|| id:ebi-a-GCST90016968	TRUE	reported	igd
genus	1	206216607	-0.09152	0.0210002	7.93414e-06	14306	ebi-a-GCST90016969	rs28479800	A	T		|| id:ebi-a-GCST90016969	TRUE	reported	igd
genus	2	180020849	0.098992	0.0214121	7.31122e-06	14306	ebi-a-GCST90016969	rs113258194	A	G		|| id:ebi-a-GCST90016969	TRUE	reported	igd
genus	3	44327429	0.0690763	0.0149374	4.2416e-06	14306	ebi-a-GCST90016969	rs62251337	G	A		|| id:ebi-a-GCST90016969	TRUE	reported	igd
genus	3	181589155	0.0917125	0.0190133	2.94761e-06	14306	ebi-a-GCST90016969	rs35177866	A	G		|| id:ebi-a-GCST90016969	TRUE	reported	igd
genus	4	114546595	-0.0818645	0.0176441	4.23302e-06	14306	ebi-a-GCST90016969	rs79795328	A	G		|| id:ebi-a-GCST90016969	TRUE	reported	igd
genus	4	102616869	-0.114369	0.0253873	6.76176e-06	14306	ebi-a-GCST90016969	rs72684847	T	C		|| id:ebi-a-GCST90016969	TRUE	reported	igd
genus	4	5730954	-0.0697176	0.0139537	4.65029e-07	14306	ebi-a-GCST90016969	rs2276875	A	G		|| id:ebi-a-GCST90016969	TRUE	reported	igd
genus	5	54107036	-0.0891491	0.0195601	3.16352e-06	14306	ebi-a-GCST90016969	rs77455852	T	G		|| id:ebi-a-GCST90016969	TRUE	reported	igd
genus	6	148601905	0.0956023	0.0212961	8.91908e-06	14306	ebi-a-GCST90016969	rs11155559	T	C		|| id:ebi-a-GCST90016969	TRUE	reported	igd
genus	6	23435415	0.0559495	0.0119716	3.00296e-06	14306	ebi-a-GCST90016969	rs199035	G	A		|| id:ebi-a-GCST90016969	TRUE	reported	igd
genus	6	110831148	-0.165859	0.0337309	8.50883e-07	14306	ebi-a-GCST90016969	rs2428166	G	A		|| id:ebi-a-GCST90016969	TRUE	reported	igd
genus	7	10076378	-0.0915241	0.0194623	3.82631e-06	14306	ebi-a-GCST90016969	rs2057922	C	G		|| id:ebi-a-GCST90016969	TRUE	reported	igd
genus	7	122021518	0.0583747	0.0123176	2.29018e-06	14306	ebi-a-GCST90016969	rs13242616	C	T		|| id:ebi-a-GCST90016969	TRUE	reported	igd
genus	8	105458416	-0.0778559	0.017164	6.77657e-06	14306	ebi-a-GCST90016969	rs76181748	C	T		|| id:ebi-a-GCST90016969	TRUE	reported	igd
genus	8	25834694	-0.0791324	0.0174957	6.47635e-06	14306	ebi-a-GCST90016969	rs28418786	C	G		|| id:ebi-a-GCST90016969	TRUE	reported	igd
genus	12	54872438	-0.121478	0.025184	1.19064e-06	14306	ebi-a-GCST90016969	rs60316894	C	T		|| id:ebi-a-GCST90016969	TRUE	reported	igd
genus	15	87145913	-0.0550716	0.0120039	4.94527e-06	14306	ebi-a-GCST90016969	rs12909713	C	T		|| id:ebi-a-GCST90016969	TRUE	reported	igd
genus	1	67379595	-0.0701199	0.0158213	9.57679e-06	14306	ebi-a-GCST90016973	rs12034718	G	A		|| id:ebi-a-GCST90016973	TRUE	reported	igd
genus	2	191304149	-0.0549699	0.0123563	8.58638e-06	14306	ebi-a-GCST90016973	rs10084203	G	A		|| id:ebi-a-GCST90016973	TRUE	reported	igd
genus	2	153453410	0.0828027	0.0167401	7.61939e-07	14306	ebi-a-GCST90016973	rs56221232	T	C		|| id:ebi-a-GCST90016973	TRUE	reported	igd
genus	4	7460153	0.0506956	0.011024	3.87258e-06	14306	ebi-a-GCST90016973	rs2017189	T	G		|| id:ebi-a-GCST90016973	TRUE	reported	igd
genus	7	157688150	0.224039	0.0494959	5.93772e-06	14306	ebi-a-GCST90016973	rs62478070	T	G		|| id:ebi-a-GCST90016973	TRUE	reported	igd
genus	10	126908208	-0.0614216	0.0135979	7.38482e-06	14306	ebi-a-GCST90016973	rs4962426	T	G		|| id:ebi-a-GCST90016973	TRUE	reported	igd
genus	13	100213990	-0.0815733	0.0183167	5.51785e-06	14306	ebi-a-GCST90016973	rs7322368	C	T		|| id:ebi-a-GCST90016973	TRUE	reported	igd
genus	13	27018240	-0.262206	0.0564729	5.79189e-06	14306	ebi-a-GCST90016973	rs12585793	T	C		|| id:ebi-a-GCST90016973	TRUE	reported	igd
genus	18	22899113	0.0619423	0.0139942	6.79704e-06	14306	ebi-a-GCST90016973	rs75238760	T	A		|| id:ebi-a-GCST90016973	TRUE	reported	igd
genus	1	45082825	-0.0694173	0.0150795	5.38158e-06	14306	ebi-a-GCST90016974	rs270727	G	C		|| id:ebi-a-GCST90016974	TRUE	reported	igd
genus	2	83093264	-0.133188	0.0289905	4.80408e-06	14306	ebi-a-GCST90016974	rs71428626	G	T		|| id:ebi-a-GCST90016974	TRUE	reported	igd
genus	3	78740009	-0.14948	0.0327073	4.05807e-06	14306	ebi-a-GCST90016974	rs78453362	A	G		|| id:ebi-a-GCST90016974	TRUE	reported	igd
genus	3	127468661	-0.0653488	0.0137974	2.23398e-06	14306	ebi-a-GCST90016974	rs782080	A	T		|| id:ebi-a-GCST90016974	TRUE	reported	igd
genus	5	997217	0.0759694	0.0167617	8.18653e-06	14306	ebi-a-GCST90016974	rs326049	C	G		|| id:ebi-a-GCST90016974	TRUE	reported	igd
genus	5	62119947	0.0713357	0.0145396	8.58084e-07	14306	ebi-a-GCST90016974	rs2642760	G	C		|| id:ebi-a-GCST90016974	TRUE	reported	igd
genus	5	159867647	-0.0872983	0.0174893	7.41908e-07	14306	ebi-a-GCST90016974	rs62390301	T	C		|| id:ebi-a-GCST90016974	TRUE	reported	igd
genus	8	4834406	0.0680719	0.0148172	4.5036e-06	14306	ebi-a-GCST90016974	rs9657374	C	T		|| id:ebi-a-GCST90016974	TRUE	reported	igd
genus	10	72711156	0.0703539	0.0144439	8.85462e-07	14306	ebi-a-GCST90016974	rs7083431	A	C		|| id:ebi-a-GCST90016974	TRUE	reported	igd
genus	10	72443070	0.0664154	0.0149766	8.24594e-06	14306	ebi-a-GCST90016974	rs72814525	A	G		|| id:ebi-a-GCST90016974	TRUE	reported	igd
genus	11	56664962	0.135265	0.0298411	6.55164e-06	14306	ebi-a-GCST90016974	rs11228830	A	G		|| id:ebi-a-GCST90016974	TRUE	reported	igd
genus	12	129438771	-0.0862781	0.0196846	6.7007e-06	14306	ebi-a-GCST90016974	rs12304031	G	A		|| id:ebi-a-GCST90016974	TRUE	reported	igd
genus	15	80528373	0.062721	0.0138998	6.87717e-06	14306	ebi-a-GCST90016974	rs2114713	G	T		|| id:ebi-a-GCST90016974	TRUE	reported	igd
genus	16	22172866	0.113124	0.0248176	4.76255e-06	14306	ebi-a-GCST90016974	rs1862649	G	A		|| id:ebi-a-GCST90016974	TRUE	reported	igd
genus	18	34091618	0.122037	0.0269587	6.36649e-06	14306	ebi-a-GCST90016974	rs12458763	A	C		|| id:ebi-a-GCST90016974	TRUE	reported	igd
genus	19	49162501	0.0732608	0.0158324	3.89807e-06	14306	ebi-a-GCST90016974	rs62130338	A	G		|| id:ebi-a-GCST90016974	TRUE	reported	igd
genus	21	16550389	-0.144881	0.0274574	1.73696e-07	14306	ebi-a-GCST90016974	rs113054641	G	A		|| id:ebi-a-GCST90016974	TRUE	reported	igd
genus	1	83252771	0.110967	0.0250498	8.84993e-06	14306	ebi-a-GCST90016980	rs11586026	A	T		|| id:ebi-a-GCST90016980	TRUE	reported	igd
genus	1	3041519	0.058139	0.0124492	2.76656e-06	14306	ebi-a-GCST90016980	rs2817172	C	T		|| id:ebi-a-GCST90016980	TRUE	reported	igd
genus	1	155676492	-0.139061	0.0334454	7.7555e-06	14306	ebi-a-GCST90016980	rs11264403	G	A		|| id:ebi-a-GCST90016980	TRUE	reported	igd
genus	3	111482845	-0.0616879	0.0137581	7.49463e-06	14306	ebi-a-GCST90016980	rs12490337	C	G		|| id:ebi-a-GCST90016980	TRUE	reported	igd
genus	5	84997131	-0.22736	0.0492575	4.31688e-06	14306	ebi-a-GCST90016980	rs115807074	A	G		|| id:ebi-a-GCST90016980	TRUE	reported	igd
genus	6	165722832	-0.0783246	0.0169209	2.05069e-06	14306	ebi-a-GCST90016980	rs550843	T	C		|| id:ebi-a-GCST90016980	TRUE	reported	igd
genus	9	136710881	0.0810718	0.0180121	4.8217e-06	14306	ebi-a-GCST90016980	rs12341505	G	A		|| id:ebi-a-GCST90016980	TRUE	reported	igd
genus	10	43270264	-0.184315	0.0392204	2.72038e-06	14306	ebi-a-GCST90016980	rs2795528	G	A		|| id:ebi-a-GCST90016980	TRUE	reported	igd
genus	12	43485015	0.110021	0.0246032	4.58121e-06	14306	ebi-a-GCST90016980	rs116847295	C	T		|| id:ebi-a-GCST90016980	TRUE	reported	igd
genus	1	30400301	0.0580232	0.0122722	1.95916e-06	14306	ebi-a-GCST90016983	rs1010560	C	A		|| id:ebi-a-GCST90016983	TRUE	reported	igd
genus	1	95424321	-0.0718988	0.0144651	1.0329e-06	14306	ebi-a-GCST90016983	rs74101919	T	C		|| id:ebi-a-GCST90016983	TRUE	reported	igd
genus	2	22079770	0.0499197	0.0113558	8.95282e-06	14306	ebi-a-GCST90016983	rs1519491	T	C		|| id:ebi-a-GCST90016983	TRUE	reported	igd
genus	3	165693143	0.0573137	0.0127573	8.5686e-06	14306	ebi-a-GCST90016983	rs73167075	T	C		|| id:ebi-a-GCST90016983	TRUE	reported	igd
genus	4	174468316	-0.08963	0.0186508	1.57195e-06	14306	ebi-a-GCST90016983	rs56405618	A	G		|| id:ebi-a-GCST90016983	TRUE	reported	igd
genus	6	72529277	-0.0510343	0.0109535	3.32859e-06	14306	ebi-a-GCST90016983	rs1576241	A	G		|| id:ebi-a-GCST90016983	TRUE	reported	igd
genus	7	132556835	0.0518543	0.0113136	4.55229e-06	14306	ebi-a-GCST90016983	rs7784490	G	C		|| id:ebi-a-GCST90016983	TRUE	reported	igd
genus	10	15913820	-0.205899	0.0460018	8.61847e-06	14306	ebi-a-GCST90016983	rs946513	T	C		|| id:ebi-a-GCST90016983	TRUE	reported	igd
genus	11	124554061	0.0903299	0.0197212	4.9153e-06	14306	ebi-a-GCST90016983	rs12794898	G	T		|| id:ebi-a-GCST90016983	TRUE	reported	igd
genus	11	134622282	0.167591	0.0355224	1.97916e-06	14306	ebi-a-GCST90016983	rs73031725	T	C		|| id:ebi-a-GCST90016983	TRUE	reported	igd
genus	14	29898456	-0.0521782	0.0118051	8.00774e-06	14306	ebi-a-GCST90016983	rs12886051	G	C		|| id:ebi-a-GCST90016983	TRUE	reported	igd
genus	19	2600717	-0.0561173	0.0126824	7.65332e-06	14306	ebi-a-GCST90016983	rs2907920	G	A		|| id:ebi-a-GCST90016983	TRUE	reported	igd
genus	20	4319420	-0.0585649	0.0109914	1.1397e-07	14306	ebi-a-GCST90016983	rs4277593	G	A		|| id:ebi-a-GCST90016983	TRUE	reported	igd
genus	1	4210455	0.0727361	0.0161662	6.30681e-06	14306	ebi-a-GCST90016984	rs9426473	A	G		|| id:ebi-a-GCST90016984	TRUE	reported	igd
genus	1	112139008	-0.0804405	0.0164216	1.185e-06	14306	ebi-a-GCST90016984	rs6677933	C	T		|| id:ebi-a-GCST90016984	TRUE	reported	igd
genus	1	223688236	-0.0955381	0.0215724	6.68252e-06	14306	ebi-a-GCST90016984	rs61823518	A	C		|| id:ebi-a-GCST90016984	TRUE	reported	igd
genus	3	180544880	0.0736486	0.0164921	9.95108e-06	14306	ebi-a-GCST90016984	rs12634070	T	C		|| id:ebi-a-GCST90016984	TRUE	reported	igd
genus	4	131125786	-0.0649382	0.013919	2.27117e-06	14306	ebi-a-GCST90016984	rs72680320	T	C		|| id:ebi-a-GCST90016984	TRUE	reported	igd
genus	5	34794789	0.0594312	0.0135375	7.64874e-06	14306	ebi-a-GCST90016984	rs10070053	A	G		|| id:ebi-a-GCST90016984	TRUE	reported	igd
genus	9	25554068	0.0754415	0.0164619	4.72335e-06	14306	ebi-a-GCST90016984	rs2482516	C	T		|| id:ebi-a-GCST90016984	TRUE	reported	igd
genus	10	129715759	-0.066536	0.0147661	8.25962e-06	14306	ebi-a-GCST90016984	rs35890118	A	G		|| id:ebi-a-GCST90016984	TRUE	reported	igd
genus	14	86833255	0.0665288	0.0138558	1.57692e-06	14306	ebi-a-GCST90016984	rs1958519	T	A		|| id:ebi-a-GCST90016984	TRUE	reported	igd
genus	20	49266770	0.117085	0.0233995	9.3754e-07	14306	ebi-a-GCST90016984	rs59936925	A	T		|| id:ebi-a-GCST90016984	TRUE	reported	igd
genus	2	175403951	-0.169667	0.0374238	3.57511e-06	14306	ebi-a-GCST90016994	rs75949021	T	C		|| id:ebi-a-GCST90016994	TRUE	reported	igd
genus	1	34308917	0.0601661	0.0126752	2.60555e-06	14306	ebi-a-GCST90017000	rs10798999	C	T		|| id:ebi-a-GCST90017000	TRUE	reported	igd
genus	1	104524676	0.0810805	0.0184573	9.45453e-06	14306	ebi-a-GCST90017000	rs17474256	G	A		|| id:ebi-a-GCST90017000	TRUE	reported	igd
genus	3	23663416	0.198087	0.0443545	4.82303e-06	14306	ebi-a-GCST90017000	rs6550770	C	T		|| id:ebi-a-GCST90017000	TRUE	reported	igd
genus	3	110283389	-0.0540164	0.0116101	3.29003e-06	14306	ebi-a-GCST90017000	rs949971	T	G		|| id:ebi-a-GCST90017000	TRUE	reported	igd
genus	3	64664456	0.126115	0.0268627	4.43231e-06	14306	ebi-a-GCST90017000	rs28584818	A	G		|| id:ebi-a-GCST90017000	TRUE	reported	igd
genus	3	195238086	0.153138	0.0349456	5.43063e-06	14306	ebi-a-GCST90017000	rs138531890	A	G		|| id:ebi-a-GCST90017000	TRUE	reported	igd
genus	4	183709536	-0.0813986	0.0189272	9.3491e-06	14306	ebi-a-GCST90017000	rs17074066	T	C		|| id:ebi-a-GCST90017000	TRUE	reported	igd
genus	4	111885431	0.154124	0.0297185	2.9449e-07	14306	ebi-a-GCST90017000	rs13116360	T	C		|| id:ebi-a-GCST90017000	TRUE	reported	igd
genus	7	148856720	0.0522832	0.0111865	2.69675e-06	14306	ebi-a-GCST90017000	rs60254196	G	A		|| id:ebi-a-GCST90017000	TRUE	reported	igd
genus	7	100635375	0.0504747	0.0109922	4.42446e-06	14306	ebi-a-GCST90017000	rs10808115	C	A		|| id:ebi-a-GCST90017000	TRUE	reported	igd
genus	11	58040621	-0.115589	0.0252489	5.41914e-06	14306	ebi-a-GCST90017000	rs10501370	C	T		|| id:ebi-a-GCST90017000	TRUE	reported	igd
genus	11	123789877	-0.0507411	0.0113758	8.2882e-06	14306	ebi-a-GCST90017000	rs78056098	G	T		|| id:ebi-a-GCST90017000	TRUE	reported	igd
genus	11	11771637	-0.126582	0.028712	7.85995e-06	14306	ebi-a-GCST90017000	rs117748144	T	C		|| id:ebi-a-GCST90017000	TRUE	reported	igd
genus	15	62014160	0.208943	0.043822	3.70254e-06	14306	ebi-a-GCST90017000	rs74018587	C	T		|| id:ebi-a-GCST90017000	TRUE	reported	igd
genus	18	48384463	-0.0508914	0.0114352	9.15756e-06	14306	ebi-a-GCST90017000	rs630939	C	T		|| id:ebi-a-GCST90017000	TRUE	reported	igd
genus	19	49214274	-0.0499523	0.0112153	9.32803e-06	14306	ebi-a-GCST90017000	rs281379	A	G		|| id:ebi-a-GCST90017000	TRUE	reported	igd
genus	1	34529736	-0.130234	0.0292347	7.20676e-06	14306	ebi-a-GCST90017001	rs9425984	T	C		|| id:ebi-a-GCST90017001	TRUE	reported	igd
genus	1	171060821	-0.125454	0.0275303	6.8388e-06	14306	ebi-a-GCST90017001	rs7880204	T	C		|| id:ebi-a-GCST90017001	TRUE	reported	igd
genus	4	94712747	0.110081	0.0245964	7.82546e-06	14306	ebi-a-GCST90017001	rs6818880	G	A		|| id:ebi-a-GCST90017001	TRUE	reported	igd
genus	7	135052348	-0.187753	0.041969	8.3672e-06	14306	ebi-a-GCST90017001	rs10458299	T	C		|| id:ebi-a-GCST90017001	TRUE	reported	igd
genus	7	64894137	0.193496	0.0439023	8.90697e-06	14306	ebi-a-GCST90017001	rs10263623	C	T		|| id:ebi-a-GCST90017001	TRUE	reported	igd
genus	8	4954912	0.1223	0.0271331	7.17348e-06	14306	ebi-a-GCST90017001	rs7827125	C	T		|| id:ebi-a-GCST90017001	TRUE	reported	igd
genus	9	28245518	-0.185107	0.0403573	5.75705e-06	14306	ebi-a-GCST90017001	rs113893692	C	T		|| id:ebi-a-GCST90017001	TRUE	reported	igd
genus	9	96597985	0.201788	0.0413568	9.05378e-07	14306	ebi-a-GCST90017001	rs77910827	C	T		|| id:ebi-a-GCST90017001	TRUE	reported	igd
genus	10	61322015	-0.110167	0.024593	7.98656e-06	14306	ebi-a-GCST90017001	rs11006576	A	G		|| id:ebi-a-GCST90017001	TRUE	reported	igd
genus	10	9659749	0.160621	0.0341609	3.56139e-06	14306	ebi-a-GCST90017001	rs61841040	G	T		|| id:ebi-a-GCST90017001	TRUE	reported	igd
genus	14	52185888	-0.186907	0.0341475	6.59781e-08	14306	ebi-a-GCST90017001	rs34297067	A	G		|| id:ebi-a-GCST90017001	TRUE	reported	igd
genus	1	195064019	-0.0893273	0.0198333	5.79522e-06	14306	ebi-a-GCST90017002	rs12129908	A	C		|| id:ebi-a-GCST90017002	TRUE	reported	igd
genus	4	37526679	0.0923559	0.0195439	2.38836e-06	14306	ebi-a-GCST90017002	rs2973294	G	T		|| id:ebi-a-GCST90017002	TRUE	reported	igd
genus	4	187905399	-0.0906104	0.0200612	7.32285e-06	14306	ebi-a-GCST90017002	rs1425962	C	G		|| id:ebi-a-GCST90017002	TRUE	reported	igd
genus	5	106882394	-0.0932766	0.0195294	1.65406e-06	14306	ebi-a-GCST90017002	rs440215	T	C		|| id:ebi-a-GCST90017002	TRUE	reported	igd
genus	12	94515340	0.14098	0.0295029	2.62924e-06	14306	ebi-a-GCST90017002	rs12423772	G	T		|| id:ebi-a-GCST90017002	TRUE	reported	igd
genus	16	86480355	0.216145	0.045992	2.51166e-06	14306	ebi-a-GCST90017002	rs34561138	G	A		|| id:ebi-a-GCST90017002	TRUE	reported	igd
genus	1	147291928	0.0749762	0.0164404	3.35792e-06	14306	ebi-a-GCST90017005	rs78250280	G	A		|| id:ebi-a-GCST90017005	TRUE	reported	igd
genus	1	109398264	0.0751501	0.0164978	6.11139e-06	14306	ebi-a-GCST90017005	rs66746423	C	T		|| id:ebi-a-GCST90017005	TRUE	reported	igd
genus	2	203661779	-0.0739179	0.0166705	6.62232e-06	14306	ebi-a-GCST90017005	rs6704822	G	A		|| id:ebi-a-GCST90017005	TRUE	reported	igd
genus	3	107736434	-0.0715522	0.016137	9.55983e-06	14306	ebi-a-GCST90017005	rs13082419	C	T		|| id:ebi-a-GCST90017005	TRUE	reported	igd
genus	3	171895485	0.0528752	0.0117972	6.8691e-06	14306	ebi-a-GCST90017005	rs66830358	T	A		|| id:ebi-a-GCST90017005	TRUE	reported	igd
genus	3	190223732	0.0783394	0.0160257	7.9704e-07	14306	ebi-a-GCST90017005	rs57199565	T	C		|| id:ebi-a-GCST90017005	TRUE	reported	igd
genus	4	126371814	0.0975711	0.0224388	5.20907e-06	14306	ebi-a-GCST90017005	rs73849225	T	C		|| id:ebi-a-GCST90017005	TRUE	reported	igd
genus	8	114445055	-0.0906428	0.0191909	1.73968e-06	14306	ebi-a-GCST90017005	rs16884680	G	T		|| id:ebi-a-GCST90017005	TRUE	reported	igd
genus	12	52423996	0.0618696	0.0132532	2.88908e-06	14306	ebi-a-GCST90017005	rs876734	T	C		|| id:ebi-a-GCST90017005	TRUE	reported	igd
genus	13	51938576	-0.0817111	0.0183121	7.8352e-06	14306	ebi-a-GCST90017005	rs9316536	T	G		|| id:ebi-a-GCST90017005	TRUE	reported	igd
genus	13	98785900	-0.143349	0.0286241	7.21755e-07	14306	ebi-a-GCST90017005	rs11617697	A	G		|| id:ebi-a-GCST90017005	TRUE	reported	igd
genus	14	44975510	-0.0548171	0.0118426	3.5532e-06	14306	ebi-a-GCST90017005	rs3809430	T	C		|| id:ebi-a-GCST90017005	TRUE	reported	igd
genus	14	51960625	-0.0627263	0.013786	5.75798e-06	14306	ebi-a-GCST90017005	rs35179274	C	T		|| id:ebi-a-GCST90017005	TRUE	reported	igd
genus	16	60348381	0.0658926	0.0143747	6.54757e-06	14306	ebi-a-GCST90017005	rs72783037	C	A		|| id:ebi-a-GCST90017005	TRUE	reported	igd
genus	18	22460785	0.0587198	0.0123453	2.07501e-06	14306	ebi-a-GCST90017005	rs12964517	G	A		|| id:ebi-a-GCST90017005	TRUE	reported	igd
genus	20	50140919	-0.0956303	0.0193428	9.53608e-07	14306	ebi-a-GCST90017005	rs73615400	T	C		|| id:ebi-a-GCST90017005	TRUE	reported	igd
genus	20	2308307	-0.0603594	0.011658	2.50323e-07	14306	ebi-a-GCST90017005	rs6048195	A	T		|| id:ebi-a-GCST90017005	TRUE	reported	igd
genus	1	246780557	-0.0553508	0.0123588	7.19615e-06	14306	ebi-a-GCST90017006	rs4654122	G	C		|| id:ebi-a-GCST90017006	TRUE	reported	igd
genus	1	22627266	0.0612633	0.0130917	3.15152e-06	14306	ebi-a-GCST90017006	rs10917203	A	C		|| id:ebi-a-GCST90017006	TRUE	reported	igd
genus	4	87891938	-0.114498	0.0263455	9.38707e-06	14306	ebi-a-GCST90017006	rs75586835	A	G		|| id:ebi-a-GCST90017006	TRUE	reported	igd
genus	7	43566344	0.0687427	0.0142728	1.81782e-06	14306	ebi-a-GCST90017006	rs13239072	G	A		|| id:ebi-a-GCST90017006	TRUE	reported	igd
genus	9	130498120	-0.0949051	0.0203503	3.75491e-06	14306	ebi-a-GCST90017006	rs1999224	G	T		|| id:ebi-a-GCST90017006	TRUE	reported	igd
genus	11	131009660	0.0877797	0.0189012	4.21328e-06	14306	ebi-a-GCST90017006	rs2213117	T	G		|| id:ebi-a-GCST90017006	TRUE	reported	igd
genus	14	73181783	0.0576795	0.012599	4.95861e-06	14306	ebi-a-GCST90017006	rs10140184	A	C		|| id:ebi-a-GCST90017006	TRUE	reported	igd
genus	16	73696771	-0.113455	0.0245762	3.32767e-06	14306	ebi-a-GCST90017006	rs112176119	C	T		|| id:ebi-a-GCST90017006	TRUE	reported	igd
genus	16	84790559	-0.0573202	0.0126905	6.52544e-06	14306	ebi-a-GCST90017006	rs2012708	G	A		|| id:ebi-a-GCST90017006	TRUE	reported	igd
genus	17	66689958	-0.0951677	0.0199969	2.40979e-06	14306	ebi-a-GCST90017006	rs79582700	C	G		|| id:ebi-a-GCST90017006	TRUE	reported	igd
genus	19	8255478	-0.108274	0.0238257	5.01938e-06	14306	ebi-a-GCST90017006	rs12980122	C	G		|| id:ebi-a-GCST90017006	TRUE	reported	igd
genus	20	57995506	-0.160597	0.0310515	2.38891e-07	14306	ebi-a-GCST90017006	rs17830032	G	A		|| id:ebi-a-GCST90017006	TRUE	reported	igd
genus	1	192019835	-0.0899559	0.0177107	6.88763e-07	14306	ebi-a-GCST90017008	rs72730932	C	A		|| id:ebi-a-GCST90017008	TRUE	reported	igd
genus	1	240694163	0.0608052	0.0122149	6.75118e-07	14306	ebi-a-GCST90017008	rs16840310	G	A		|| id:ebi-a-GCST90017008	TRUE	reported	igd
genus	2	74195551	-0.0904399	0.0196301	5.91248e-06	14306	ebi-a-GCST90017008	rs11126423	T	C		|| id:ebi-a-GCST90017008	TRUE	reported	igd
genus	3	29811865	0.10752	0.0240482	8.70803e-06	14306	ebi-a-GCST90017008	rs9837139	A	G		|| id:ebi-a-GCST90017008	TRUE	reported	igd
genus	3	3556826	-0.0657834	0.0129056	3.87543e-07	14306	ebi-a-GCST90017008	rs9852893	G	C		|| id:ebi-a-GCST90017008	TRUE	reported	igd
genus	4	38917830	-0.0759493	0.0172101	9.02049e-06	14306	ebi-a-GCST90017008	rs11736617	G	A		|| id:ebi-a-GCST90017008	TRUE	reported	igd
genus	5	14159925	-0.0645635	0.0143225	7.48187e-06	14306	ebi-a-GCST90017008	rs149302	T	C		|| id:ebi-a-GCST90017008	TRUE	reported	igd
genus	6	32695336	-0.0811384	0.0185669	8.92771e-06	14306	ebi-a-GCST90017008	rs9276029	A	G		|| id:ebi-a-GCST90017008	TRUE	reported	igd
genus	7	28603985	-0.112891	0.0245292	4.1917e-06	14306	ebi-a-GCST90017008	rs17156849	G	A		|| id:ebi-a-GCST90017008	TRUE	reported	igd
genus	9	136678954	0.0649589	0.0147534	7.87807e-06	14306	ebi-a-GCST90017008	rs739451	C	T		|| id:ebi-a-GCST90017008	TRUE	reported	igd
genus	12	18127597	-0.096065	0.020828	2.55806e-06	14306	ebi-a-GCST90017008	rs12812672	T	C		|| id:ebi-a-GCST90017008	TRUE	reported	igd
genus	15	40047706	-0.0811976	0.0183335	6.90828e-06	14306	ebi-a-GCST90017008	rs12911842	A	T		|| id:ebi-a-GCST90017008	TRUE	reported	igd
genus	15	58683697	0.0732552	0.0159898	3.90841e-06	14306	ebi-a-GCST90017008	rs16940167	C	T		|| id:ebi-a-GCST90017008	TRUE	reported	igd
genus	16	16006242	0.128753	0.0276002	3.89081e-06	14306	ebi-a-GCST90017008	rs62029761	A	G		|| id:ebi-a-GCST90017008	TRUE	reported	igd
genus	20	4618639	-0.0800851	0.0163834	5.80216e-07	14306	ebi-a-GCST90017008	rs62200412	C	T		|| id:ebi-a-GCST90017008	TRUE	reported	igd
genus	1	183503664	-0.112639	0.0242751	5.19709e-06	14306	ebi-a-GCST90017009	rs3842897	G	A		|| id:ebi-a-GCST90017009	TRUE	reported	igd
genus	1	85228325	-0.0647298	0.0134065	1.17379e-06	14306	ebi-a-GCST90017009	rs12049454	T	C		|| id:ebi-a-GCST90017009	TRUE	reported	igd
genus	3	45479090	0.19313	0.0419866	3.77477e-06	14306	ebi-a-GCST90017009	rs76463770	A	G		|| id:ebi-a-GCST90017009	TRUE	reported	igd
genus	3	188224096	0.0665521	0.0137151	1.24934e-06	14306	ebi-a-GCST90017009	rs1426266	C	T		|| id:ebi-a-GCST90017009	TRUE	reported	igd
genus	6	76598635	-0.0611904	0.013457	4.29181e-06	14306	ebi-a-GCST90017009	rs62414802	C	T		|| id:ebi-a-GCST90017009	TRUE	reported	igd
genus	11	94681786	-0.0809085	0.0174782	3.52493e-06	14306	ebi-a-GCST90017009	rs7119679	G	A		|| id:ebi-a-GCST90017009	TRUE	reported	igd
genus	15	25151194	-0.121679	0.0260821	3.04635e-06	14306	ebi-a-GCST90017009	rs116979587	T	A		|| id:ebi-a-GCST90017009	TRUE	reported	igd
genus	17	78223817	-0.088655	0.0198094	8.01826e-06	14306	ebi-a-GCST90017009	rs8076666	G	A		|| id:ebi-a-GCST90017009	TRUE	reported	igd
genus	17	33761027	-0.149047	0.0333271	7.87771e-06	14306	ebi-a-GCST90017009	rs112362903	A	G		|| id:ebi-a-GCST90017009	TRUE	reported	igd
genus	21	45153079	-0.0759406	0.0165099	5.35673e-06	14306	ebi-a-GCST90017009	rs2276529	C	G		|| id:ebi-a-GCST90017009	TRUE	reported	igd
genus	6	129224488	0.106544	0.0200323	1.46913e-07	14306	ebi-a-GCST90017013	rs12191680	C	G		|| id:ebi-a-GCST90017013	TRUE	reported	igd
genus	6	8350917	0.0723095	0.0148799	1.42269e-06	14306	ebi-a-GCST90017013	rs9328464	T	C		|| id:ebi-a-GCST90017013	TRUE	reported	igd
genus	6	55448491	-0.093521	0.0172649	7.12049e-08	14306	ebi-a-GCST90017013	rs9382510	C	T		|| id:ebi-a-GCST90017013	TRUE	reported	igd
genus	7	24360361	-0.108393	0.0247052	7.23236e-06	14306	ebi-a-GCST90017013	rs56310940	G	C		|| id:ebi-a-GCST90017013	TRUE	reported	igd
genus	9	78752170	-0.0948915	0.0203221	4.32265e-06	14306	ebi-a-GCST90017013	rs10781340	A	G		|| id:ebi-a-GCST90017013	TRUE	reported	igd
genus	9	105650242	-0.246256	0.0503924	1.66744e-06	14306	ebi-a-GCST90017013	rs78909003	T	C		|| id:ebi-a-GCST90017013	TRUE	reported	igd
genus	10	94306385	0.244638	0.0505504	1.83033e-06	14306	ebi-a-GCST90017013	rs76022354	C	T		|| id:ebi-a-GCST90017013	TRUE	reported	igd
genus	11	9951672	-0.0677384	0.0151463	7.36529e-06	14306	ebi-a-GCST90017013	rs10840326	C	G		|| id:ebi-a-GCST90017013	TRUE	reported	igd
genus	12	115493337	0.128249	0.0268779	2.00951e-06	14306	ebi-a-GCST90017013	rs35509	G	A		|| id:ebi-a-GCST90017013	TRUE	reported	igd
genus	13	85114550	0.0749201	0.016711	9.62498e-06	14306	ebi-a-GCST90017013	rs12876183	T	A		|| id:ebi-a-GCST90017013	TRUE	reported	igd
genus	13	36104947	-0.0736375	0.0155227	2.18022e-06	14306	ebi-a-GCST90017013	rs9574096	A	T		|| id:ebi-a-GCST90017013	TRUE	reported	igd
genus	16	48742489	-0.124265	0.026016	1.27347e-06	14306	ebi-a-GCST90017013	rs111582866	G	A		|| id:ebi-a-GCST90017013	TRUE	reported	igd
genus	17	64535013	-0.192957	0.0416755	2.14062e-06	14306	ebi-a-GCST90017013	rs9895850	T	C		|| id:ebi-a-GCST90017013	TRUE	reported	igd
genus	22	26891808	0.0705861	0.0151388	3.47848e-06	14306	ebi-a-GCST90017013	rs4822728	T	C		|| id:ebi-a-GCST90017013	TRUE	reported	igd
genus	3	60615680	0.0788638	0.0176744	8.38147e-06	14306	ebi-a-GCST90017015	rs967319	T	C		|| id:ebi-a-GCST90017015	TRUE	reported	igd
genus	5	106209093	0.079488	0.0177002	7.2297e-06	14306	ebi-a-GCST90017015	rs4146507	C	T		|| id:ebi-a-GCST90017015	TRUE	reported	igd
genus	5	77388406	0.164556	0.0341775	1.77468e-06	14306	ebi-a-GCST90017015	rs77293403	A	G		|| id:ebi-a-GCST90017015	TRUE	reported	igd
genus	6	105737322	0.0926764	0.0178886	4.08517e-07	14306	ebi-a-GCST90017015	rs9500080	C	T		|| id:ebi-a-GCST90017015	TRUE	reported	igd
genus	7	38292857	-0.0660617	0.0149427	9.51853e-06	14306	ebi-a-GCST90017015	rs12701617	A	G		|| id:ebi-a-GCST90017015	TRUE	reported	igd
genus	7	63323145	-0.148594	0.0327469	7.77177e-06	14306	ebi-a-GCST90017015	rs73139538	G	A		|| id:ebi-a-GCST90017015	TRUE	reported	igd
genus	8	123973840	-0.128935	0.0282526	9.35729e-06	14306	ebi-a-GCST90017015	rs113593397	A	G		|| id:ebi-a-GCST90017015	TRUE	reported	igd
genus	10	115332413	-0.135137	0.0301894	8.59825e-06	14306	ebi-a-GCST90017015	rs10885477	T	C		|| id:ebi-a-GCST90017015	TRUE	reported	igd
genus	10	129908282	-0.232987	0.0519183	6.04213e-06	14306	ebi-a-GCST90017015	rs80149660	C	T		|| id:ebi-a-GCST90017015	TRUE	reported	igd
genus	11	18768068	0.0842919	0.0162192	2.7388e-07	14306	ebi-a-GCST90017015	rs1867876	T	C		|| id:ebi-a-GCST90017015	TRUE	reported	igd
genus	12	39589195	0.162139	0.0332089	2.37766e-06	14306	ebi-a-GCST90017015	rs150096134	T	A		|| id:ebi-a-GCST90017015	TRUE	reported	igd
genus	13	81685543	-0.13755	0.0293386	2.34477e-06	14306	ebi-a-GCST90017015	rs116500994	G	T		|| id:ebi-a-GCST90017015	TRUE	reported	igd
genus	13	70856516	-0.074038	0.0160494	5.96664e-06	14306	ebi-a-GCST90017015	rs9529719	C	T		|| id:ebi-a-GCST90017015	TRUE	reported	igd
genus	14	102553414	-0.124871	0.0270129	2.44433e-06	14306	ebi-a-GCST90017015	rs41438744	C	G		|| id:ebi-a-GCST90017015	TRUE	reported	igd
genus	15	93110222	0.120677	0.0265781	3.70775e-06	14306	ebi-a-GCST90017015	rs111745969	A	G		|| id:ebi-a-GCST90017015	TRUE	reported	igd
genus	17	26789271	-0.0665238	0.0149837	6.66884e-06	14306	ebi-a-GCST90017015	rs11080063	G	A		|| id:ebi-a-GCST90017015	TRUE	reported	igd
genus	17	76443497	0.128671	0.0282795	5.89196e-06	14306	ebi-a-GCST90017015	rs55888180	C	G		|| id:ebi-a-GCST90017015	TRUE	reported	igd
genus	20	3839754	0.0910829	0.0178561	5.16928e-07	14306	ebi-a-GCST90017015	rs6133067	T	C		|| id:ebi-a-GCST90017015	TRUE	reported	igd
genus	2	20054971	0.0583322	0.0130729	7.85037e-06	14306	ebi-a-GCST90017018	rs893394	G	A		|| id:ebi-a-GCST90017018	TRUE	reported	igd
genus	3	70657785	0.0662258	0.0149877	9.25763e-06	14306	ebi-a-GCST90017018	rs68093214	C	T		|| id:ebi-a-GCST90017018	TRUE	reported	igd
genus	4	179361262	-0.0608559	0.0132145	4.25991e-06	14306	ebi-a-GCST90017018	rs2702387	G	A		|| id:ebi-a-GCST90017018	TRUE	reported	igd
genus	4	14324623	-0.0775151	0.0139665	3.54544e-08	14306	ebi-a-GCST90017018	rs10805326	A	G		|| id:ebi-a-GCST90017018	TRUE	reported	igd
genus	5	159686256	0.0890455	0.0193905	3.05781e-06	14306	ebi-a-GCST90017018	rs6875660	C	T		|| id:ebi-a-GCST90017018	TRUE	reported	igd
genus	5	148846426	0.0628342	0.0136652	5.6391e-06	14306	ebi-a-GCST90017018	rs447950	A	G		|| id:ebi-a-GCST90017018	TRUE	reported	igd
genus	6	10303945	0.099082	0.0221625	6.25936e-06	14306	ebi-a-GCST90017018	rs9348442	C	T		|| id:ebi-a-GCST90017018	TRUE	reported	igd
genus	6	170918194	0.151096	0.0351476	6.84227e-06	14306	ebi-a-GCST90017018	rs62430350	T	C		|| id:ebi-a-GCST90017018	TRUE	reported	igd
genus	9	21502923	-0.112189	0.0235439	1.80098e-06	14306	ebi-a-GCST90017018	rs16938435	T	C		|| id:ebi-a-GCST90017018	TRUE	reported	igd
genus	11	127703160	0.0575295	0.0128416	6.78875e-06	14306	ebi-a-GCST90017018	rs2098844	T	C		|| id:ebi-a-GCST90017018	TRUE	reported	igd
genus	11	125663184	0.142681	0.0297116	1.81991e-06	14306	ebi-a-GCST90017018	rs478972	C	T		|| id:ebi-a-GCST90017018	TRUE	reported	igd
genus	12	97928437	-0.0624272	0.0138539	5.4949e-06	14306	ebi-a-GCST90017018	rs11109097	T	C		|| id:ebi-a-GCST90017018	TRUE	reported	igd
genus	15	92446683	-0.0810346	0.0154397	1.64327e-07	14306	ebi-a-GCST90017018	rs4327025	G	A		|| id:ebi-a-GCST90017018	TRUE	reported	igd
genus	16	5993076	-0.151829	0.0324471	2.67436e-06	14306	ebi-a-GCST90017018	rs118030283	G	A		|| id:ebi-a-GCST90017018	TRUE	reported	igd
genus	20	61325223	0.0924508	0.0204658	6.6799e-06	14306	ebi-a-GCST90017018	rs6062862	A	G		|| id:ebi-a-GCST90017018	TRUE	reported	igd
genus	1	185091351	-0.0468097	0.0105787	9.57194e-06	14306	ebi-a-GCST90017020	rs12566975	T	C		|| id:ebi-a-GCST90017020	TRUE	reported	igd
genus	2	167244051	0.0497799	0.0111919	9.63984e-06	14306	ebi-a-GCST90017020	rs1528479	A	G		|| id:ebi-a-GCST90017020	TRUE	reported	igd
genus	3	23037786	0.0511752	0.0106491	2.0268e-06	14306	ebi-a-GCST90017020	rs615997	T	C		|| id:ebi-a-GCST90017020	TRUE	reported	igd
genus	3	177470032	0.0864203	0.0181565	1.58332e-06	14306	ebi-a-GCST90017020	rs62285313	A	G		|| id:ebi-a-GCST90017020	TRUE	reported	igd
genus	3	66725825	0.078627	0.0175644	6.31379e-06	14306	ebi-a-GCST90017020	rs1031599	T	G		|| id:ebi-a-GCST90017020	TRUE	reported	igd
genus	4	38694566	-0.0864066	0.0192519	6.72048e-06	14306	ebi-a-GCST90017020	rs3821998	C	A		|| id:ebi-a-GCST90017020	TRUE	reported	igd
genus	8	59370320	0.0520267	0.011404	4.41754e-06	14306	ebi-a-GCST90017020	rs4738679	A	G		|| id:ebi-a-GCST90017020	TRUE	reported	igd
genus	12	102046595	0.108075	0.0242022	5.97077e-06	14306	ebi-a-GCST90017020	rs1997204	C	T		|| id:ebi-a-GCST90017020	TRUE	reported	igd
genus	16	27217620	0.0469989	0.0105971	9.17044e-06	14306	ebi-a-GCST90017020	rs62028349	G	C		|| id:ebi-a-GCST90017020	TRUE	reported	igd
genus	17	46694541	0.117472	0.0268103	5.57763e-06	14306	ebi-a-GCST90017020	rs72829893	G	T		|| id:ebi-a-GCST90017020	TRUE	reported	igd
genus	17	13816159	0.0886199	0.0194248	3.66522e-06	14306	ebi-a-GCST90017020	rs78068103	A	G		|| id:ebi-a-GCST90017020	TRUE	reported	igd
genus	18	19743455	0.0746186	0.0180734	7.13724e-06	14306	ebi-a-GCST90017020	rs2385421	A	G		|| id:ebi-a-GCST90017020	TRUE	reported	igd
genus	18	1053252	-0.0641288	0.0137974	3.75327e-06	14306	ebi-a-GCST90017020	rs789029	C	T		|| id:ebi-a-GCST90017020	TRUE	reported	igd
genus	20	19300846	-0.0561715	0.0108174	2.43215e-07	14306	ebi-a-GCST90017020	rs6112314	A	C		|| id:ebi-a-GCST90017020	TRUE	reported	igd
genus	1	234157721	0.115182	0.0246006	3.10592e-06	14306	ebi-a-GCST90017022	rs12127733	G	A		|| id:ebi-a-GCST90017022	TRUE	reported	igd
genus	5	149544722	-0.0883469	0.0188397	3.32583e-06	14306	ebi-a-GCST90017022	rs3756315	A	G		|| id:ebi-a-GCST90017022	TRUE	reported	igd
genus	6	22725908	-0.154739	0.0340372	9.74833e-06	14306	ebi-a-GCST90017022	rs12208226	C	A		|| id:ebi-a-GCST90017022	TRUE	reported	igd
genus	9	29334137	0.102522	0.0226445	6.17234e-06	14306	ebi-a-GCST90017022	rs1928659	T	C		|| id:ebi-a-GCST90017022	TRUE	reported	igd
genus	9	122239986	-0.0948806	0.0208369	5.34355e-06	14306	ebi-a-GCST90017022	rs1331592	G	C		|| id:ebi-a-GCST90017022	TRUE	reported	igd
genus	13	76829562	0.0837206	0.0190318	9.05503e-06	14306	ebi-a-GCST90017022	rs1929743	T	C		|| id:ebi-a-GCST90017022	TRUE	reported	igd
genus	13	47512191	-0.156365	0.0345372	6.03976e-06	14306	ebi-a-GCST90017022	rs12863463	G	A		|| id:ebi-a-GCST90017022	TRUE	reported	igd
genus	17	21157406	-0.169687	0.0383169	9.13314e-06	14306	ebi-a-GCST90017022	rs117467633	T	C		|| id:ebi-a-GCST90017022	TRUE	reported	igd
genus	18	58229086	-0.154631	0.0352194	5.61203e-06	14306	ebi-a-GCST90017022	rs17067076	G	A		|| id:ebi-a-GCST90017022	TRUE	reported	igd
genus	20	5330700	0.0994748	0.0209139	2.92247e-06	14306	ebi-a-GCST90017022	rs6116753	G	A		|| id:ebi-a-GCST90017022	TRUE	reported	igd
genus	3	172950553	0.0572304	0.0127279	7.36936e-06	14306	ebi-a-GCST90017023	rs2861203	G	A		|| id:ebi-a-GCST90017023	TRUE	reported	igd
genus	4	7678735	-0.0636978	0.0142041	4.47806e-06	14306	ebi-a-GCST90017023	rs13110238	C	G		|| id:ebi-a-GCST90017023	TRUE	reported	igd
genus	10	14137663	-0.0647067	0.014797	8.71686e-06	14306	ebi-a-GCST90017023	rs72776675	T	C		|| id:ebi-a-GCST90017023	TRUE	reported	igd
genus	16	1100633	-0.0561864	0.0115984	1.24882e-06	14306	ebi-a-GCST90017023	rs9932954	A	G		|| id:ebi-a-GCST90017023	TRUE	reported	igd
genus	1	54578401	-0.0520656	0.0109082	1.78201e-06	14306	ebi-a-GCST90017024	rs954878	A	G		|| id:ebi-a-GCST90017024	TRUE	reported	igd
genus	3	55181375	-0.0492283	0.0109388	7.05424e-06	14306	ebi-a-GCST90017024	rs4955932	T	C		|| id:ebi-a-GCST90017024	TRUE	reported	igd
genus	3	190415145	-0.230542	0.0483465	2.77389e-06	14306	ebi-a-GCST90017024	rs7616165	G	T		|| id:ebi-a-GCST90017024	TRUE	reported	igd
genus	3	161749981	-0.22973	0.0499776	2.93089e-06	14306	ebi-a-GCST90017024	rs76193507	A	G		|| id:ebi-a-GCST90017024	TRUE	reported	igd
genus	5	90289997	0.0936162	0.0207982	9.45388e-06	14306	ebi-a-GCST90017024	rs59805249	T	C		|| id:ebi-a-GCST90017024	TRUE	reported	igd
genus	5	6116659	-0.0513831	0.0108094	2.12197e-06	14306	ebi-a-GCST90017024	rs160061	G	A		|| id:ebi-a-GCST90017024	TRUE	reported	igd
genus	7	8497922	0.0487709	0.0109614	9.08113e-06	14306	ebi-a-GCST90017024	rs10952110	G	T		|| id:ebi-a-GCST90017024	TRUE	reported	igd
genus	8	84735080	0.0508285	0.0110591	9.34329e-06	14306	ebi-a-GCST90017024	rs28540839	A	C		|| id:ebi-a-GCST90017024	TRUE	reported	igd
genus	8	4842929	-0.0714756	0.0151703	3.57084e-06	14306	ebi-a-GCST90017024	rs7832116	A	G		|| id:ebi-a-GCST90017024	TRUE	reported	igd
genus	10	62175024	0.0499621	0.0109693	5.26914e-06	14306	ebi-a-GCST90017024	rs7073658	G	T		|| id:ebi-a-GCST90017024	TRUE	reported	igd
genus	11	3922055	0.0573168	0.0115466	8.0423e-07	14306	ebi-a-GCST90017024	rs12362320	G	C		|| id:ebi-a-GCST90017024	TRUE	reported	igd
genus	14	100177681	-0.0549104	0.0115385	2.36777e-06	14306	ebi-a-GCST90017024	rs68104925	T	C		|| id:ebi-a-GCST90017024	TRUE	reported	igd
genus	17	30016653	0.0599578	0.0134693	5.61423e-06	14306	ebi-a-GCST90017024	rs2880566	T	C		|| id:ebi-a-GCST90017024	TRUE	reported	igd
genus	17	35240097	-0.0524615	0.0116758	5.06512e-06	14306	ebi-a-GCST90017024	rs11263806	A	G		|| id:ebi-a-GCST90017024	TRUE	reported	igd
genus	19	21806125	0.0902532	0.0199652	5.83042e-06	14306	ebi-a-GCST90017024	rs12611395	G	A		|| id:ebi-a-GCST90017024	TRUE	reported	igd
genus	19	51256120	-0.10758	0.0229884	3.57256e-06	14306	ebi-a-GCST90017024	rs73044693	A	G		|| id:ebi-a-GCST90017024	TRUE	reported	igd
genus	1	116887742	0.200758	0.0442121	6.1776e-06	14306	ebi-a-GCST90017031	rs6674304	C	T		|| id:ebi-a-GCST90017031	TRUE	reported	igd
genus	2	54114864	-0.199221	0.0430969	1.39592e-06	14306	ebi-a-GCST90017031	rs2293361	C	T		|| id:ebi-a-GCST90017031	TRUE	reported	igd
genus	2	31266049	0.108423	0.0239978	6.6083e-06	14306	ebi-a-GCST90017031	rs12621813	G	A		|| id:ebi-a-GCST90017031	TRUE	reported	igd
genus	7	14650221	0.191857	0.0424761	6.28608e-06	14306	ebi-a-GCST90017031	rs17168302	G	A		|| id:ebi-a-GCST90017031	TRUE	reported	igd
genus	10	71518643	0.146426	0.0307367	2.36211e-06	14306	ebi-a-GCST90017031	rs55910161	C	T		|| id:ebi-a-GCST90017031	TRUE	reported	igd
genus	12	113161438	0.114599	0.023839	2.06144e-06	14306	ebi-a-GCST90017031	rs4766997	C	T		|| id:ebi-a-GCST90017031	TRUE	reported	igd
genus	13	113472525	-0.104232	0.0230786	4.44723e-06	14306	ebi-a-GCST90017031	rs7992246	C	T		|| id:ebi-a-GCST90017031	TRUE	reported	igd
genus	17	2699935	0.13671	0.0274694	1.26561e-06	14306	ebi-a-GCST90017031	rs123059	C	T		|| id:ebi-a-GCST90017031	TRUE	reported	igd
genus	18	64699550	0.122294	0.0228976	8.95035e-08	14306	ebi-a-GCST90017031	rs34757988	G	C		|| id:ebi-a-GCST90017031	TRUE	reported	igd
genus	19	28767353	-0.118306	0.024522	1.28677e-06	14306	ebi-a-GCST90017031	rs10417872	G	T		|| id:ebi-a-GCST90017031	TRUE	reported	igd
genus	22	31532568	-0.140799	0.027582	4.36878e-07	14306	ebi-a-GCST90017031	rs757872	C	G		|| id:ebi-a-GCST90017031	TRUE	reported	igd
genus	2	125440268	0.112811	0.0239106	3.08546e-06	14306	ebi-a-GCST90017033	rs10202904	G	T		|| id:ebi-a-GCST90017033	TRUE	reported	igd
genus	3	15053083	-0.188956	0.0419905	8.04896e-06	14306	ebi-a-GCST90017033	rs6776814	T	C		|| id:ebi-a-GCST90017033	TRUE	reported	igd
genus	4	104418307	0.214213	0.0456045	3.81566e-06	14306	ebi-a-GCST90017033	rs894996	C	A		|| id:ebi-a-GCST90017033	TRUE	reported	igd
genus	10	112266046	0.115197	0.0255492	7.61377e-06	14306	ebi-a-GCST90017033	rs1334944	T	C		|| id:ebi-a-GCST90017033	TRUE	reported	igd
genus	11	89349287	0.113013	0.0254343	7.03105e-06	14306	ebi-a-GCST90017033	rs11018665	A	T		|| id:ebi-a-GCST90017033	TRUE	reported	igd
genus	13	41963791	0.222849	0.0454319	1.07552e-06	14306	ebi-a-GCST90017033	rs76029318	T	C		|| id:ebi-a-GCST90017033	TRUE	reported	igd
genus	15	31516919	-0.109639	0.0247979	9.28282e-06	14306	ebi-a-GCST90017033	rs4779844	C	G		|| id:ebi-a-GCST90017033	TRUE	reported	igd
genus	19	52925820	0.135628	0.0308139	9.73823e-06	14306	ebi-a-GCST90017033	rs4802933	G	A		|| id:ebi-a-GCST90017033	TRUE	reported	igd
genus	4	11907559	-0.0881922	0.0194146	6.05954e-06	14306	ebi-a-GCST90017034	rs6856150	A	G		|| id:ebi-a-GCST90017034	TRUE	reported	igd
genus	8	1266824	-0.0577795	0.0125389	3.67443e-06	14306	ebi-a-GCST90017034	rs10093869	A	G		|| id:ebi-a-GCST90017034	TRUE	reported	igd
genus	8	69677480	0.121449	0.0264106	9.48681e-06	14306	ebi-a-GCST90017034	rs74553962	T	G		|| id:ebi-a-GCST90017034	TRUE	reported	igd
genus	11	6848360	0.0999781	0.0223785	8.85054e-06	14306	ebi-a-GCST90017034	rs16918425	A	T		|| id:ebi-a-GCST90017034	TRUE	reported	igd
genus	12	67655943	-0.133489	0.0268526	6.56251e-07	14306	ebi-a-GCST90017034	rs77779484	G	A		|| id:ebi-a-GCST90017034	TRUE	reported	igd
genus	14	70944224	-0.0726896	0.0161372	3.68036e-06	14306	ebi-a-GCST90017034	rs28417404	A	G		|| id:ebi-a-GCST90017034	TRUE	reported	igd
genus	15	58063881	0.0618294	0.0118887	2.07625e-07	14306	ebi-a-GCST90017034	rs503751	C	G		|| id:ebi-a-GCST90017034	TRUE	reported	igd
genus	17	46763962	-0.0576329	0.0129154	6.02698e-06	14306	ebi-a-GCST90017034	rs4793970	A	G		|| id:ebi-a-GCST90017034	TRUE	reported	igd
genus	19	49523088	-0.0550695	0.0121164	6.5793e-06	14306	ebi-a-GCST90017034	rs10423795	T	C		|| id:ebi-a-GCST90017034	TRUE	reported	igd
genus	1	76803093	0.0774322	0.0172216	6.85125e-06	14306	ebi-a-GCST90017037	rs751183	C	T		|| id:ebi-a-GCST90017037	TRUE	reported	igd
genus	3	172373615	-0.08321	0.0168666	1.09428e-06	14306	ebi-a-GCST90017037	rs73038677	T	A		|| id:ebi-a-GCST90017037	TRUE	reported	igd
genus	4	89483300	0.114051	0.0252838	3.36589e-06	14306	ebi-a-GCST90017037	rs28889936	A	C		|| id:ebi-a-GCST90017037	TRUE	reported	igd
genus	6	18093691	-0.133016	0.0269733	1.04222e-06	14306	ebi-a-GCST90017037	rs12206468	G	A		|| id:ebi-a-GCST90017037	TRUE	reported	igd
genus	6	56160483	-0.130569	0.0281674	5.62704e-06	14306	ebi-a-GCST90017037	rs72866977	A	C		|| id:ebi-a-GCST90017037	TRUE	reported	igd
genus	6	170474630	0.0898456	0.0198088	6.46755e-06	14306	ebi-a-GCST90017037	rs62422654	C	T		|| id:ebi-a-GCST90017037	TRUE	reported	igd
genus	14	28151415	0.0826246	0.0175252	2.26772e-06	14306	ebi-a-GCST90017037	rs1954532	C	T		|| id:ebi-a-GCST90017037	TRUE	reported	igd
genus	16	89792856	0.13559	0.030678	9.31022e-06	14306	ebi-a-GCST90017037	rs12925026	T	C		|| id:ebi-a-GCST90017037	TRUE	reported	igd
genus	17	14881860	0.0715392	0.0156539	5.61319e-06	14306	ebi-a-GCST90017037	rs8076323	A	G		|| id:ebi-a-GCST90017037	TRUE	reported	igd
genus	3	171947435	0.130293	0.0242237	7.51069e-08	14306	ebi-a-GCST90017038	rs4428215	G	A		|| id:ebi-a-GCST90017038	TRUE	reported	igd
genus	4	189935314	0.207847	0.0421439	8.79812e-07	14306	ebi-a-GCST90017038	rs36057338	G	T		|| id:ebi-a-GCST90017038	TRUE	reported	igd
genus	6	38550301	-0.138078	0.0296981	3.64502e-06	14306	ebi-a-GCST90017038	rs1569853	T	C		|| id:ebi-a-GCST90017038	TRUE	reported	igd
genus	8	115560689	0.127217	0.0278855	7.12771e-06	14306	ebi-a-GCST90017038	rs6993398	G	A		|| id:ebi-a-GCST90017038	TRUE	reported	igd
genus	8	20902693	0.137691	0.0294804	3.29754e-06	14306	ebi-a-GCST90017038	rs10464997	G	A		|| id:ebi-a-GCST90017038	TRUE	reported	igd
genus	9	19682558	0.217122	0.0466317	1.41504e-06	14306	ebi-a-GCST90017038	rs12002250	A	C		|| id:ebi-a-GCST90017038	TRUE	reported	igd
genus	9	87514407	-0.117882	0.0211262	2.57472e-08	14306	ebi-a-GCST90017038	rs736744	T	C		|| id:ebi-a-GCST90017038	TRUE	reported	igd
genus	11	126582578	-0.172142	0.0394026	9.18692e-06	14306	ebi-a-GCST90017038	rs3862635	C	T		|| id:ebi-a-GCST90017038	TRUE	reported	igd
genus	12	96819204	-0.199099	0.0427327	3.74283e-06	14306	ebi-a-GCST90017038	rs11108500	A	G		|| id:ebi-a-GCST90017038	TRUE	reported	igd
genus	15	93941937	0.213114	0.047162	7.29861e-06	14306	ebi-a-GCST90017038	rs111966731	T	C		|| id:ebi-a-GCST90017038	TRUE	reported	igd
genus	20	59502888	-0.105512	0.021489	1.07431e-06	14306	ebi-a-GCST90017038	rs6071435	T	A		|| id:ebi-a-GCST90017038	TRUE	reported	igd
genus	22	37421469	-0.130992	0.0253804	2.06054e-07	14306	ebi-a-GCST90017038	rs6000536	C	T		|| id:ebi-a-GCST90017038	TRUE	reported	igd
genus	1	29736216	-0.123657	0.0278514	9.71717e-06	14306	ebi-a-GCST90017044	rs9426434	T	C		|| id:ebi-a-GCST90017044	TRUE	reported	igd
genus	1	3343802	-0.121281	0.0275017	9.48986e-06	14306	ebi-a-GCST90017044	rs12124567	A	G		|| id:ebi-a-GCST90017044	TRUE	reported	igd
genus	2	12101762	0.155486	0.0316057	6.2157e-07	14306	ebi-a-GCST90017044	rs57404562	C	A		|| id:ebi-a-GCST90017044	TRUE	reported	igd
genus	2	242066314	0.12085	0.0261776	4.8415e-06	14306	ebi-a-GCST90017044	rs2240542	C	T		|| id:ebi-a-GCST90017044	TRUE	reported	igd
genus	3	60474379	0.139155	0.0297055	2.86847e-06	14306	ebi-a-GCST90017044	rs430270	A	C		|| id:ebi-a-GCST90017044	TRUE	reported	igd
genus	6	91019654	0.196528	0.0442322	8.72811e-06	14306	ebi-a-GCST90017044	rs12195431	T	C		|| id:ebi-a-GCST90017044	TRUE	reported	igd
genus	10	133000320	0.114648	0.0254916	6.42407e-06	14306	ebi-a-GCST90017044	rs2918132	T	C		|| id:ebi-a-GCST90017044	TRUE	reported	igd
genus	11	39821773	-0.143982	0.031501	7.51052e-06	14306	ebi-a-GCST90017044	rs79263163	A	C		|| id:ebi-a-GCST90017044	TRUE	reported	igd
genus	11	19943115	0.146098	0.0351529	9.63696e-06	14306	ebi-a-GCST90017044	rs16937247	G	C		|| id:ebi-a-GCST90017044	TRUE	reported	igd
genus	16	47237609	0.205676	0.0468917	7.85416e-06	14306	ebi-a-GCST90017044	rs118038478	A	G		|| id:ebi-a-GCST90017044	TRUE	reported	igd
genus	18	71442664	0.133012	0.0275361	1.9006e-06	14306	ebi-a-GCST90017044	rs9959718	G	A		|| id:ebi-a-GCST90017044	TRUE	reported	igd
genus	22	24613952	-0.158213	0.0336317	2.06685e-06	14306	ebi-a-GCST90017044	rs9608249	A	G		|| id:ebi-a-GCST90017044	TRUE	reported	igd
genus	1	95178974	0.0697527	0.0153607	7.3426e-06	14306	ebi-a-GCST90017048	rs12740451	T	C		|| id:ebi-a-GCST90017048	TRUE	reported	igd
genus	1	194183650	-0.0777312	0.0172985	8.12587e-06	14306	ebi-a-GCST90017048	rs302266	T	C		|| id:ebi-a-GCST90017048	TRUE	reported	igd
genus	3	57116228	0.0497336	0.0108158	3.5272e-06	14306	ebi-a-GCST90017048	rs6445851	A	G		|| id:ebi-a-GCST90017048	TRUE	reported	igd
genus	4	119349	-0.153844	0.0329324	1.19525e-06	14306	ebi-a-GCST90017048	rs116270582	T	A		|| id:ebi-a-GCST90017048	TRUE	reported	igd
genus	5	89598914	0.0493786	0.0106763	4.11405e-06	14306	ebi-a-GCST90017048	rs2943022	T	C		|| id:ebi-a-GCST90017048	TRUE	reported	igd
genus	5	144135655	0.0968739	0.0214067	9.98321e-06	14306	ebi-a-GCST90017048	rs78753150	A	C		|| id:ebi-a-GCST90017048	TRUE	reported	igd
genus	5	125076494	0.0690327	0.0152884	5.90147e-06	14306	ebi-a-GCST90017048	rs329182	T	C		|| id:ebi-a-GCST90017048	TRUE	reported	igd
genus	6	166170836	-0.104628	0.0230897	7.50205e-06	14306	ebi-a-GCST90017048	rs75326254	C	T		|| id:ebi-a-GCST90017048	TRUE	reported	igd
genus	6	12774611	-0.0961587	0.0204975	2.47942e-06	14306	ebi-a-GCST90017048	rs6930661	C	T		|| id:ebi-a-GCST90017048	TRUE	reported	igd
genus	10	16051097	0.0488326	0.0106404	4.67218e-06	14306	ebi-a-GCST90017048	rs4748237	G	C		|| id:ebi-a-GCST90017048	TRUE	reported	igd
genus	10	79277321	-0.232125	0.0481562	1.47798e-07	14306	ebi-a-GCST90017048	rs75820970	C	G		|| id:ebi-a-GCST90017048	TRUE	reported	igd
genus	11	12009569	-0.0980434	0.020957	2.91112e-06	14306	ebi-a-GCST90017048	rs16910295	T	C		|| id:ebi-a-GCST90017048	TRUE	reported	igd
genus	12	50650057	-0.0550687	0.0112481	9.6984e-07	14306	ebi-a-GCST90017048	rs2160994	C	T		|| id:ebi-a-GCST90017048	TRUE	reported	igd
genus	13	103117486	-0.0588452	0.0126228	4.75116e-06	14306	ebi-a-GCST90017048	rs9300744	C	T		|| id:ebi-a-GCST90017048	TRUE	reported	igd
genus	15	86512809	0.179284	0.0404954	9.98964e-06	14306	ebi-a-GCST90017048	rs55858165	A	C		|| id:ebi-a-GCST90017048	TRUE	reported	igd
genus	15	37859065	0.0741405	0.0171601	8.30099e-06	14306	ebi-a-GCST90017048	rs57466170	C	T		|| id:ebi-a-GCST90017048	TRUE	reported	igd
genus	16	8307948	0.0629765	0.0123489	5.01164e-07	14306	ebi-a-GCST90017048	rs2034589	G	C		|| id:ebi-a-GCST90017048	TRUE	reported	igd
genus	1	41878680	-0.0520975	0.0115111	6.20869e-06	14306	ebi-a-GCST90017049	rs2801960	G	C		|| id:ebi-a-GCST90017049	TRUE	reported	igd
genus	2	103755970	0.181548	0.0414078	8.82226e-06	14306	ebi-a-GCST90017049	rs73002572	G	C		|| id:ebi-a-GCST90017049	TRUE	reported	igd
genus	3	55243531	-0.0713749	0.0165826	9.9552e-06	14306	ebi-a-GCST90017049	rs4955951	A	G		|| id:ebi-a-GCST90017049	TRUE	reported	igd
genus	5	32477664	0.0820689	0.0174463	3.98896e-06	14306	ebi-a-GCST90017049	rs113753996	T	C		|| id:ebi-a-GCST90017049	TRUE	reported	igd
genus	6	50405920	-0.0830505	0.0180073	3.52574e-06	14306	ebi-a-GCST90017049	rs1492620	T	C		|| id:ebi-a-GCST90017049	TRUE	reported	igd
genus	8	131316030	0.051717	0.0113369	5.53962e-06	14306	ebi-a-GCST90017049	rs2791343	T	C		|| id:ebi-a-GCST90017049	TRUE	reported	igd
genus	10	35262588	-0.0547387	0.0115163	2.1918e-06	14306	ebi-a-GCST90017049	rs10827477	A	G		|| id:ebi-a-GCST90017049	TRUE	reported	igd
genus	10	12835085	0.0518991	0.0108777	1.70314e-06	14306	ebi-a-GCST90017049	rs2482038	C	A		|| id:ebi-a-GCST90017049	TRUE	reported	igd
genus	12	1891043	0.0518814	0.0107482	1.43857e-06	14306	ebi-a-GCST90017049	rs2286384	C	G		|| id:ebi-a-GCST90017049	TRUE	reported	igd
genus	13	108775162	-0.0484169	0.0108254	8.16188e-06	14306	ebi-a-GCST90017049	rs1223978	C	T		|| id:ebi-a-GCST90017049	TRUE	reported	igd
genus	16	86769909	0.0740543	0.0159151	5.89807e-06	14306	ebi-a-GCST90017049	rs8053158	G	A		|| id:ebi-a-GCST90017049	TRUE	reported	igd
genus	20	60293505	0.0932955	0.0199206	2.64107e-06	14306	ebi-a-GCST90017049	rs6121460	G	A		|| id:ebi-a-GCST90017049	TRUE	reported	igd
genus	20	41177956	-0.0950311	0.0193507	1.14623e-06	14306	ebi-a-GCST90017049	rs79968837	A	G		|| id:ebi-a-GCST90017049	TRUE	reported	igd
genus	21	19151940	-0.0585939	0.0121017	1.32681e-06	14306	ebi-a-GCST90017049	rs243585	C	G		|| id:ebi-a-GCST90017049	TRUE	reported	igd
genus	21	33811886	0.0489617	0.0108702	6.81648e-06	14306	ebi-a-GCST90017049	rs2833828	G	A		|| id:ebi-a-GCST90017049	TRUE	reported	igd
genus	1	179370499	-0.120881	0.0249229	1.51985e-06	14306	ebi-a-GCST90017059	rs12724320	C	T		|| id:ebi-a-GCST90017059	TRUE	reported	igd
genus	1	219901055	-0.184934	0.0394616	2.36772e-06	14306	ebi-a-GCST90017059	rs9729514	G	A		|| id:ebi-a-GCST90017059	TRUE	reported	igd
genus	3	76205107	-0.111816	0.0248963	7.74622e-06	14306	ebi-a-GCST90017059	rs4490371	T	C		|| id:ebi-a-GCST90017059	TRUE	reported	igd
genus	3	185469491	0.132725	0.0282037	2.81235e-06	14306	ebi-a-GCST90017059	rs12636310	G	A		|| id:ebi-a-GCST90017059	TRUE	reported	igd
genus	6	105073676	-0.182339	0.0339898	7.04417e-08	14306	ebi-a-GCST90017059	rs1416041	A	C		|| id:ebi-a-GCST90017059	TRUE	reported	igd
genus	7	111763988	0.109097	0.0233699	3.18676e-06	14306	ebi-a-GCST90017059	rs2729556	T	C		|| id:ebi-a-GCST90017059	TRUE	reported	igd
genus	7	11222521	0.110917	0.0244556	6.49606e-06	14306	ebi-a-GCST90017059	rs10274562	C	T		|| id:ebi-a-GCST90017059	TRUE	reported	igd
genus	12	29634919	-0.152166	0.0317519	2.06125e-06	14306	ebi-a-GCST90017059	rs79113084	C	T		|| id:ebi-a-GCST90017059	TRUE	reported	igd
genus	1	9361576	0.0661211	0.0144736	4.72585e-06	14306	ebi-a-GCST90017060	rs11581881	C	T		|| id:ebi-a-GCST90017060	TRUE	reported	igd
genus	3	197049996	-0.0607903	0.0130847	4.19382e-06	14306	ebi-a-GCST90017060	rs12485353	G	A		|| id:ebi-a-GCST90017060	TRUE	reported	igd
genus	3	9534657	0.194976	0.0418213	3.34981e-06	14306	ebi-a-GCST90017060	rs76973485	G	T		|| id:ebi-a-GCST90017060	TRUE	reported	igd
genus	5	3628882	0.105087	0.023446	9.54707e-06	14306	ebi-a-GCST90017060	rs9313055	T	C		|| id:ebi-a-GCST90017060	TRUE	reported	igd
genus	5	141395140	0.0684961	0.014558	1.67954e-06	14306	ebi-a-GCST90017060	rs12189346	G	A		|| id:ebi-a-GCST90017060	TRUE	reported	igd
genus	7	32530997	0.0498329	0.0112066	8.16263e-06	14306	ebi-a-GCST90017060	rs7784330	A	G		|| id:ebi-a-GCST90017060	TRUE	reported	igd
genus	8	40311885	-0.0488692	0.0109907	8.43782e-06	14306	ebi-a-GCST90017060	rs2730183	G	A		|| id:ebi-a-GCST90017060	TRUE	reported	igd
genus	9	136620584	-0.0490863	0.0109903	8.37606e-06	14306	ebi-a-GCST90017060	rs2428106	C	G		|| id:ebi-a-GCST90017060	TRUE	reported	igd
genus	9	13609119	-0.0856047	0.0189311	8.603e-06	14306	ebi-a-GCST90017060	rs12336782	T	C		|| id:ebi-a-GCST90017060	TRUE	reported	igd
genus	10	19780463	0.111491	0.0240157	4.15499e-06	14306	ebi-a-GCST90017060	rs16918863	A	C		|| id:ebi-a-GCST90017060	TRUE	reported	igd
genus	10	2219930	-0.0656129	0.0117477	2.553e-08	14306	ebi-a-GCST90017060	rs12781711	C	T		|| id:ebi-a-GCST90017060	TRUE	reported	igd
genus	10	115650278	-0.0598404	0.0131807	6.46205e-06	14306	ebi-a-GCST90017060	rs4385846	T	G		|| id:ebi-a-GCST90017060	TRUE	reported	igd
genus	12	30245557	-0.0942968	0.0200712	2.55399e-06	14306	ebi-a-GCST90017060	rs75088940	T	C		|| id:ebi-a-GCST90017060	TRUE	reported	igd
genus	13	76583319	-0.0524592	0.0117701	8.72529e-06	14306	ebi-a-GCST90017060	rs9565219	T	A		|| id:ebi-a-GCST90017060	TRUE	reported	igd
genus	16	10863459	0.0533411	0.0120757	9.63585e-06	14306	ebi-a-GCST90017060	rs1729063	C	G		|| id:ebi-a-GCST90017060	TRUE	reported	igd
genus	1	237422989	0.082486	0.0187194	9.96323e-06	14306	ebi-a-GCST90017061	rs10495392	T	C		|| id:ebi-a-GCST90017061	TRUE	reported	igd
genus	1	15322582	-0.115767	0.0254199	8.70502e-06	14306	ebi-a-GCST90017061	rs74060145	C	G		|| id:ebi-a-GCST90017061	TRUE	reported	igd
genus	2	119467367	0.0577127	0.0126675	7.0419e-06	14306	ebi-a-GCST90017061	rs439810	C	G		|| id:ebi-a-GCST90017061	TRUE	reported	igd
genus	2	57205854	0.0671775	0.0139838	2.4119e-06	14306	ebi-a-GCST90017061	rs72809222	T	C		|| id:ebi-a-GCST90017061	TRUE	reported	igd
genus	2	134854659	0.060048	0.0126417	1.90222e-06	14306	ebi-a-GCST90017061	rs995642	C	T		|| id:ebi-a-GCST90017061	TRUE	reported	igd
genus	3	101334609	0.0582548	0.0119657	1.21143e-06	14306	ebi-a-GCST90017061	rs12638134	T	G		|| id:ebi-a-GCST90017061	TRUE	reported	igd
genus	3	123829361	-0.0993852	0.0216819	6.71754e-06	14306	ebi-a-GCST90017061	rs73186226	G	A		|| id:ebi-a-GCST90017061	TRUE	reported	igd
genus	5	36435597	-0.122057	0.0260017	2.39701e-06	14306	ebi-a-GCST90017061	rs10941294	C	T		|| id:ebi-a-GCST90017061	TRUE	reported	igd
genus	5	26110626	-0.18835	0.0386643	4.62328e-07	14306	ebi-a-GCST90017061	rs115777838	T	C		|| id:ebi-a-GCST90017061	TRUE	reported	igd
genus	7	109564034	-0.058129	0.012903	6.04422e-06	14306	ebi-a-GCST90017061	rs62478832	T	A		|| id:ebi-a-GCST90017061	TRUE	reported	igd
genus	8	3636548	-0.0688023	0.0156083	9.80438e-06	14306	ebi-a-GCST90017061	rs34402072	C	T		|| id:ebi-a-GCST90017061	TRUE	reported	igd
genus	9	14363769	0.139276	0.0299132	2.9128e-06	14306	ebi-a-GCST90017061	rs56105232	G	A		|| id:ebi-a-GCST90017061	TRUE	reported	igd
genus	10	119928413	-0.0528257	0.0119367	9.75461e-06	14306	ebi-a-GCST90017061	rs853612	A	G		|| id:ebi-a-GCST90017061	TRUE	reported	igd
genus	11	126024042	0.0607865	0.0138761	9.91791e-06	14306	ebi-a-GCST90017061	rs61898819	A	T		|| id:ebi-a-GCST90017061	TRUE	reported	igd
genus	11	131659000	0.0664624	0.0150069	9.7618e-06	14306	ebi-a-GCST90017061	rs10791168	G	A		|| id:ebi-a-GCST90017061	TRUE	reported	igd
genus	16	87759750	0.067562	0.0150103	7.4266e-06	14306	ebi-a-GCST90017061	rs77627087	C	G		|| id:ebi-a-GCST90017061	TRUE	reported	igd
genus	18	4084336	-0.110863	0.0248098	8.73756e-06	14306	ebi-a-GCST90017061	rs79640386	T	A		|| id:ebi-a-GCST90017061	TRUE	reported	igd
genus	19	49175964	-0.0829544	0.0185058	7.33719e-06	14306	ebi-a-GCST90017061	rs17296933	C	G		|| id:ebi-a-GCST90017061	TRUE	reported	igd
genus	1	20552072	-0.0580215	0.0127806	5.10352e-06	14306	ebi-a-GCST90017064	rs2105937	G	A		|| id:ebi-a-GCST90017064	TRUE	reported	igd
genus	1	161880482	0.0955324	0.0213436	5.03721e-06	14306	ebi-a-GCST90017064	rs12079579	A	G		|| id:ebi-a-GCST90017064	TRUE	reported	igd
genus	2	191954852	-0.0610096	0.0130484	3.38213e-06	14306	ebi-a-GCST90017064	rs10931481	A	G		|| id:ebi-a-GCST90017064	TRUE	reported	igd
genus	3	112372317	-0.0621643	0.0126072	8.49122e-07	14306	ebi-a-GCST90017064	rs9870933	G	A		|| id:ebi-a-GCST90017064	TRUE	reported	igd
genus	4	18824860	0.0736808	0.0169665	7.48032e-06	14306	ebi-a-GCST90017064	rs73802842	C	A		|| id:ebi-a-GCST90017064	TRUE	reported	igd
genus	5	112627773	0.0709419	0.0156855	7.27562e-06	14306	ebi-a-GCST90017064	rs13188803	T	A		|| id:ebi-a-GCST90017064	TRUE	reported	igd
genus	5	166419552	0.094737	0.0210157	5.53669e-06	14306	ebi-a-GCST90017064	rs431418	G	A		|| id:ebi-a-GCST90017064	TRUE	reported	igd
genus	7	153487396	0.110654	0.0240684	4.49376e-06	14306	ebi-a-GCST90017064	rs12539819	C	T		|| id:ebi-a-GCST90017064	TRUE	reported	igd
genus	8	137090850	-0.0566974	0.0123497	5.27716e-06	14306	ebi-a-GCST90017064	rs2166943	C	A		|| id:ebi-a-GCST90017064	TRUE	reported	igd
genus	10	29201860	-0.067603	0.0133738	2.46371e-07	14306	ebi-a-GCST90017064	rs2047242	A	G		|| id:ebi-a-GCST90017064	TRUE	reported	igd
genus	12	61119266	0.0590284	0.0124874	1.85964e-06	14306	ebi-a-GCST90017064	rs1391597	C	T		|| id:ebi-a-GCST90017064	TRUE	reported	igd
genus	15	85563483	0.0654926	0.0139101	2.27463e-06	14306	ebi-a-GCST90017064	rs289410	A	G		|| id:ebi-a-GCST90017064	TRUE	reported	igd
genus	16	2767894	0.121037	0.02386	2.90764e-07	14306	ebi-a-GCST90017064	rs71386687	T	G		|| id:ebi-a-GCST90017064	TRUE	reported	igd
genus	3	94103591	0.107024	0.0228121	3.59484e-06	14306	ebi-a-GCST90017070	rs11720390	G	A		|| id:ebi-a-GCST90017070	TRUE	reported	igd
genus	3	132058723	-0.0633829	0.0136647	4.93867e-06	14306	ebi-a-GCST90017070	rs6806351	T	C		|| id:ebi-a-GCST90017070	TRUE	reported	igd
genus	4	37452858	-0.0907696	0.0200344	5.47545e-06	14306	ebi-a-GCST90017070	rs57646748	G	A		|| id:ebi-a-GCST90017070	TRUE	reported	igd
genus	4	53657577	-0.0921167	0.0191881	7.30348e-06	14306	ebi-a-GCST90017070	rs10028567	C	T		|| id:ebi-a-GCST90017070	TRUE	reported	igd
genus	5	169689604	0.0792781	0.0173697	4.36506e-06	14306	ebi-a-GCST90017070	rs395407	C	G		|| id:ebi-a-GCST90017070	TRUE	reported	igd
genus	7	46774896	-0.0695345	0.0143671	1.28632e-06	14306	ebi-a-GCST90017070	rs11764382	A	G		|| id:ebi-a-GCST90017070	TRUE	reported	igd
genus	8	10199548	-0.0793955	0.0170628	3.04096e-06	14306	ebi-a-GCST90017070	rs17708276	A	G		|| id:ebi-a-GCST90017070	TRUE	reported	igd
genus	9	93556174	-0.0517935	0.0111324	3.30704e-06	14306	ebi-a-GCST90017070	rs10448310	A	G		|| id:ebi-a-GCST90017070	TRUE	reported	igd
genus	10	8102404	0.0931048	0.0207949	6.51478e-06	14306	ebi-a-GCST90017070	rs71481756	T	G		|| id:ebi-a-GCST90017070	TRUE	reported	igd
genus	10	28588269	0.102891	0.0217362	2.717e-06	14306	ebi-a-GCST90017070	rs7916711	A	G		|| id:ebi-a-GCST90017070	TRUE	reported	igd
genus	11	131649446	-0.059639	0.0128148	2.44068e-06	14306	ebi-a-GCST90017070	rs1918540	A	G		|| id:ebi-a-GCST90017070	TRUE	reported	igd
genus	12	100584014	-0.137519	0.0227398	2.58315e-09	14306	ebi-a-GCST90017070	rs11110281	T	C		|| id:ebi-a-GCST90017070	TRUE	reported	igd
genus	14	97526750	-0.0816836	0.0185851	9.75237e-06	14306	ebi-a-GCST90017070	rs2370083	G	T		|| id:ebi-a-GCST90017070	TRUE	reported	igd
genus	15	41663393	0.0959942	0.0193213	1.03307e-06	14306	ebi-a-GCST90017070	rs72739637	A	G		|| id:ebi-a-GCST90017070	TRUE	reported	igd
genus	16	73391982	-0.0827344	0.0180035	5.8213e-06	14306	ebi-a-GCST90017070	rs6563952	C	G		|| id:ebi-a-GCST90017070	TRUE	reported	igd
genus	17	61298020	-0.0515109	0.0112068	3.7812e-06	14306	ebi-a-GCST90017070	rs4968759	A	G		|| id:ebi-a-GCST90017070	TRUE	reported	igd
genus	17	80576624	-0.0709483	0.0155275	4.17994e-06	14306	ebi-a-GCST90017070	rs9903102	C	A		|| id:ebi-a-GCST90017070	TRUE	reported	igd
genus	2	57810406	-0.131341	0.0286292	1.51604e-06	14306	ebi-a-GCST90017075	rs7561370	C	T		|| id:ebi-a-GCST90017075	TRUE	reported	igd
genus	5	16388259	-0.140368	0.0274708	5.87814e-07	14306	ebi-a-GCST90017075	rs17706273	T	C		|| id:ebi-a-GCST90017075	TRUE	reported	igd
genus	6	5755626	-0.141081	0.0305446	4.15375e-06	14306	ebi-a-GCST90017075	rs6920448	C	T		|| id:ebi-a-GCST90017075	TRUE	reported	igd
genus	6	102680257	0.143869	0.031828	7.90788e-06	14306	ebi-a-GCST90017075	rs1232220	T	G		|| id:ebi-a-GCST90017075	TRUE	reported	igd
genus	7	82547827	-0.163819	0.0336386	1.54135e-06	14306	ebi-a-GCST90017075	rs17809157	A	T		|| id:ebi-a-GCST90017075	TRUE	reported	igd
genus	9	33113322	0.144156	0.0301626	1.76121e-06	14306	ebi-a-GCST90017075	rs7019909	T	C		|| id:ebi-a-GCST90017075	TRUE	reported	igd
genus	10	46098286	-0.216348	0.0477575	6.17675e-06	14306	ebi-a-GCST90017075	rs112102233	A	G		|| id:ebi-a-GCST90017075	TRUE	reported	igd
genus	11	87588698	0.12238	0.0274683	8.85442e-06	14306	ebi-a-GCST90017075	rs10898797	C	T		|| id:ebi-a-GCST90017075	TRUE	reported	igd
genus	12	77390329	0.159008	0.0353306	6.76394e-06	14306	ebi-a-GCST90017075	rs191093	G	A		|| id:ebi-a-GCST90017075	TRUE	reported	igd
genus	13	81593016	-0.207191	0.0453121	4.87607e-06	14306	ebi-a-GCST90017075	rs7333521	T	C		|| id:ebi-a-GCST90017075	TRUE	reported	igd
genus	13	35023691	-0.184966	0.0383029	1.70675e-06	14306	ebi-a-GCST90017075	rs75091807	G	T		|| id:ebi-a-GCST90017075	TRUE	reported	igd
genus	14	89595945	-0.117151	0.0250306	3.09272e-06	14306	ebi-a-GCST90017075	rs4904512	T	C		|| id:ebi-a-GCST90017075	TRUE	reported	igd
genus	17	3738781	-0.11435	0.0238604	1.33549e-06	14306	ebi-a-GCST90017075	rs55799124	A	G		|| id:ebi-a-GCST90017075	TRUE	reported	igd
genus	19	1030320	0.132164	0.022208	3.7405e-09	14306	ebi-a-GCST90017075	rs67476743	T	G		|| id:ebi-a-GCST90017075	TRUE	reported	igd
genus	1	178945043	-0.0703062	0.0153954	5.49693e-06	14306	ebi-a-GCST90017088	rs6656807	G	A		|| id:ebi-a-GCST90017088	TRUE	reported	igd
genus	3	125544032	-0.0761385	0.0164228	3.11803e-06	14306	ebi-a-GCST90017088	rs7645873	T	A		|| id:ebi-a-GCST90017088	TRUE	reported	igd
genus	5	119914285	-0.0762216	0.0163499	3.65452e-06	14306	ebi-a-GCST90017088	rs62376424	C	T		|| id:ebi-a-GCST90017088	TRUE	reported	igd
genus	8	13253770	-0.0793499	0.0164818	1.77578e-06	14306	ebi-a-GCST90017088	rs12679709	C	G		|| id:ebi-a-GCST90017088	TRUE	reported	igd
genus	9	89306305	-0.0783421	0.0174393	9.74653e-06	14306	ebi-a-GCST90017088	rs11141494	G	A		|| id:ebi-a-GCST90017088	TRUE	reported	igd
genus	11	2956783	0.107329	0.0237633	5.5143e-06	14306	ebi-a-GCST90017088	rs55807413	A	G		|| id:ebi-a-GCST90017088	TRUE	reported	igd
genus	11	44302154	0.0720698	0.0155153	3.42129e-06	14306	ebi-a-GCST90017088	rs2013594	C	T		|| id:ebi-a-GCST90017088	TRUE	reported	igd
genus	12	129984555	0.0744538	0.0165214	7.1264e-06	14306	ebi-a-GCST90017088	rs11614532	G	C		|| id:ebi-a-GCST90017088	TRUE	reported	igd
genus	14	106939916	-0.135391	0.030352	7.39895e-06	14306	ebi-a-GCST90017088	rs7359080	C	A		|| id:ebi-a-GCST90017088	TRUE	reported	igd
genus	21	30010673	-0.0768966	0.0163908	2.98092e-06	14306	ebi-a-GCST90017088	rs1882878	A	G		|| id:ebi-a-GCST90017088	TRUE	reported	igd
genus	22	45604800	-0.0688571	0.0149769	4.65693e-06	14306	ebi-a-GCST90017088	rs742016	A	G		|| id:ebi-a-GCST90017088	TRUE	reported	igd
genus	2	38049069	0.130568	0.0276239	2.76707e-06	1531	ebi-a-GCST90017089	rs11899949	G	A		|| id:ebi-a-GCST90017089	TRUE	reported	igd
genus	3	57723877	0.117031	0.0249764	2.95822e-06	1531	ebi-a-GCST90017089	rs6445926	G	C		|| id:ebi-a-GCST90017089	TRUE	reported	igd
genus	4	9608445	-0.178036	0.0374344	2.54132e-06	1531	ebi-a-GCST90017089	rs12512543	A	C		|| id:ebi-a-GCST90017089	TRUE	reported	igd
genus	5	180579462	0.110803	0.0249655	9.93276e-06	1531	ebi-a-GCST90017089	rs2546432	C	T		|| id:ebi-a-GCST90017089	TRUE	reported	igd
genus	6	131630319	0.116918	0.0247515	2.75201e-06	1531	ebi-a-GCST90017089	rs4895919	C	T		|| id:ebi-a-GCST90017089	TRUE	reported	igd
genus	7	106378229	-0.152754	0.0351572	8.15943e-06	1531	ebi-a-GCST90017089	rs342302	A	G		|| id:ebi-a-GCST90017089	TRUE	reported	igd
genus	9	136309841	-0.181449	0.0391678	2.60375e-06	1531	ebi-a-GCST90017089	rs592514	T	A		|| id:ebi-a-GCST90017089	TRUE	reported	igd
genus	11	9312796	-0.158501	0.0315231	6.25749e-07	1531	ebi-a-GCST90017089	rs56349194	A	G		|| id:ebi-a-GCST90017089	TRUE	reported	igd
genus	12	102514184	0.121561	0.0246058	8.22224e-07	1531	ebi-a-GCST90017089	rs4764863	G	A		|| id:ebi-a-GCST90017089	TRUE	reported	igd
genus	13	72876881	-0.13381	0.0290127	7.65244e-06	1531	ebi-a-GCST90017089	rs173120	C	T		|| id:ebi-a-GCST90017089	TRUE	reported	igd
genus	14	96071125	-0.118576	0.0263146	7.65244e-06	1531	ebi-a-GCST90017089	rs911666	T	C		|| id:ebi-a-GCST90017089	TRUE	reported	igd
genus	21	40405606	-0.13827	0.031273	8.72831e-06	1531	ebi-a-GCST90017089	rs1882775	A	G		|| id:ebi-a-GCST90017089	TRUE	reported	igd
genus	1	19790706	-0.0532404	0.0110864	1.65124e-06	14306	ebi-a-GCST90016962	rs67705352	T	G		|| id:ebi-a-GCST90016962	TRUE	reported	igd
genus	2	178000949	-0.0776618	0.0172986	8.20729e-06	14306	ebi-a-GCST90016962	rs12990744	C	T		|| id:ebi-a-GCST90016962	TRUE	reported	igd
genus	5	177755179	-0.0981222	0.0218272	9.29566e-06	14306	ebi-a-GCST90016962	rs11958296	A	G		|| id:ebi-a-GCST90016962	TRUE	reported	igd
genus	7	135778919	0.0634575	0.0137846	3.9158e-06	14306	ebi-a-GCST90016962	rs67281112	G	C		|| id:ebi-a-GCST90016962	TRUE	reported	igd
genus	7	62443498	-0.0528793	0.0109389	1.44961e-06	14306	ebi-a-GCST90016962	rs11769002	G	A		|| id:ebi-a-GCST90016962	TRUE	reported	igd
genus	8	144428720	-0.080524	0.0184702	7.11836e-06	14306	ebi-a-GCST90016962	rs2450745	A	C		|| id:ebi-a-GCST90016962	TRUE	reported	igd
genus	9	112120264	0.0492647	0.0109733	7.50361e-06	14306	ebi-a-GCST90016962	rs62576416	T	C		|| id:ebi-a-GCST90016962	TRUE	reported	igd
genus	9	14080129	-0.0520061	0.0113942	5.27582e-06	14306	ebi-a-GCST90016962	rs1689282	A	C		|| id:ebi-a-GCST90016962	TRUE	reported	igd
genus	10	127787142	0.0813969	0.0191632	9.10144e-06	14306	ebi-a-GCST90016962	rs2290844	C	T		|| id:ebi-a-GCST90016962	TRUE	reported	igd
genus	11	17511427	0.0524955	0.0109584	1.78423e-06	14306	ebi-a-GCST90016962	rs7129639	A	C		|| id:ebi-a-GCST90016962	TRUE	reported	igd
genus	11	130887552	0.0580945	0.0131432	8.77708e-06	14306	ebi-a-GCST90016962	rs2875322	C	T		|| id:ebi-a-GCST90016962	TRUE	reported	igd
genus	13	38057357	0.0758558	0.0171182	3.59062e-06	14306	ebi-a-GCST90016962	rs1107244	G	A		|| id:ebi-a-GCST90016962	TRUE	reported	igd
genus	17	52776479	-0.048202	0.0106868	7.00745e-06	14306	ebi-a-GCST90016962	rs34417064	A	G		|| id:ebi-a-GCST90016962	TRUE	reported	igd
genus	20	41191335	-0.0652428	0.0146155	7.4967e-06	14306	ebi-a-GCST90016962	rs4810359	A	G		|| id:ebi-a-GCST90016962	TRUE	reported	igd
genus	21	40580258	-0.049002	0.010717	4.83615e-06	14306	ebi-a-GCST90016962	rs8130320	A	G		|| id:ebi-a-GCST90016962	TRUE	reported	igd
genus	2	33607071	-0.149152	0.0316484	3.34511e-06	14306	ebi-a-GCST90016963	rs6742198	A	G		|| id:ebi-a-GCST90016963	TRUE	reported	igd
genus	5	114286707	-0.115769	0.0248626	3.58798e-06	14306	ebi-a-GCST90016963	rs1901739	G	T		|| id:ebi-a-GCST90016963	TRUE	reported	igd
genus	7	137968010	0.148523	0.0334857	6.08751e-06	14306	ebi-a-GCST90016963	rs76904847	G	A		|| id:ebi-a-GCST90016963	TRUE	reported	igd
genus	9	100150556	0.146679	0.0297186	1.20629e-06	14306	ebi-a-GCST90016963	rs35778461	C	T		|| id:ebi-a-GCST90016963	TRUE	reported	igd
genus	9	79110160	-0.168974	0.0296976	3.56574e-08	14306	ebi-a-GCST90016963	rs602075	G	A		|| id:ebi-a-GCST90016963	TRUE	reported	igd
genus	10	122413451	0.167966	0.0373586	8.87279e-06	14306	ebi-a-GCST90016963	rs7898615	T	G		|| id:ebi-a-GCST90016963	TRUE	reported	igd
genus	11	88632972	-0.112231	0.0251681	9.41109e-06	14306	ebi-a-GCST90016963	rs594561	T	C		|| id:ebi-a-GCST90016963	TRUE	reported	igd
genus	12	28018998	-0.146322	0.0320852	5.72321e-06	14306	ebi-a-GCST90016963	rs35110698	T	C		|| id:ebi-a-GCST90016963	TRUE	reported	igd
genus	18	75370866	-0.175203	0.0404474	4.88394e-06	14306	ebi-a-GCST90016963	rs685403	G	C		|| id:ebi-a-GCST90016963	TRUE	reported	igd
genus	2	211663702	0.0660052	0.014908	7.4278e-06	14306	ebi-a-GCST90016967	rs17734739	T	C		|| id:ebi-a-GCST90016967	TRUE	reported	igd
genus	2	12200752	0.0576389	0.0122994	2.42058e-06	14306	ebi-a-GCST90016967	rs4669806	G	T		|| id:ebi-a-GCST90016967	TRUE	reported	igd
genus	3	150855371	-0.0654996	0.0146188	7.35563e-06	14306	ebi-a-GCST90016967	rs1431492	C	T		|| id:ebi-a-GCST90016967	TRUE	reported	igd
genus	4	88163243	-0.144356	0.0317524	6.83471e-06	14306	ebi-a-GCST90016967	rs115414803	A	C		|| id:ebi-a-GCST90016967	TRUE	reported	igd
genus	4	172808992	-0.0497815	0.0110573	6.91879e-06	14306	ebi-a-GCST90016967	rs7675045	A	T		|| id:ebi-a-GCST90016967	TRUE	reported	igd
genus	6	165015261	0.050618	0.011049	4.22328e-06	14306	ebi-a-GCST90016967	rs9347879	T	C		|| id:ebi-a-GCST90016967	TRUE	reported	igd
genus	8	74713100	0.0774194	0.0177178	6.12675e-06	14306	ebi-a-GCST90016967	rs12056802	C	G		|| id:ebi-a-GCST90016967	TRUE	reported	igd
genus	9	78630894	0.0611743	0.0129831	4.27986e-06	14306	ebi-a-GCST90016967	rs1272208	T	G		|| id:ebi-a-GCST90016967	TRUE	reported	igd
genus	11	89040226	-0.156465	0.0366032	6.13705e-06	14306	ebi-a-GCST90016967	rs11018566	A	G		|| id:ebi-a-GCST90016967	TRUE	reported	igd
genus	11	54908652	-0.106235	0.0234815	5.41826e-06	14306	ebi-a-GCST90016967	rs2704155	T	A		|| id:ebi-a-GCST90016967	TRUE	reported	igd
genus	12	76523655	-0.0497004	0.0113402	9.85054e-06	14306	ebi-a-GCST90016967	rs34449434	A	C		|| id:ebi-a-GCST90016967	TRUE	reported	igd
genus	13	38058413	0.0877135	0.0176745	2.34515e-07	14306	ebi-a-GCST90016967	rs6563550	T	C		|| id:ebi-a-GCST90016967	TRUE	reported	igd
genus	14	77502546	0.0539336	0.0118903	7.54988e-06	14306	ebi-a-GCST90016967	rs7155595	C	A		|| id:ebi-a-GCST90016967	TRUE	reported	igd
genus	14	30607199	0.0554447	0.0117854	2.28297e-06	14306	ebi-a-GCST90016967	rs8005030	C	T		|| id:ebi-a-GCST90016967	TRUE	reported	igd
genus	14	30418008	0.0567088	0.0124877	6.67667e-06	14306	ebi-a-GCST90016967	rs10150232	A	G		|| id:ebi-a-GCST90016967	TRUE	reported	igd
genus	15	33459867	0.0903106	0.0202257	6.62369e-06	14306	ebi-a-GCST90016967	rs6494922	A	G		|| id:ebi-a-GCST90016967	TRUE	reported	igd
genus	1	207003374	-0.0619356	0.0138937	7.9965e-06	14306	ebi-a-GCST90016970	rs12022129	A	G		|| id:ebi-a-GCST90016970	TRUE	reported	igd
genus	2	136616754	-0.119703	0.0127294	1.2782e-20	14306	ebi-a-GCST90016970	rs182549	T	C		|| id:ebi-a-GCST90016970	TRUE	reported	igd
genus	2	189805784	-0.0624643	0.0131205	2.17245e-06	14306	ebi-a-GCST90016970	rs62181700	G	A		|| id:ebi-a-GCST90016970	TRUE	reported	igd
genus	2	49906864	0.0562084	0.0117923	1.92832e-06	14306	ebi-a-GCST90016970	rs4567981	T	A		|| id:ebi-a-GCST90016970	TRUE	reported	igd
genus	4	1517826	0.0546319	0.0121139	6.67022e-06	14306	ebi-a-GCST90016970	rs55888705	A	G		|| id:ebi-a-GCST90016970	TRUE	reported	igd
genus	5	521096	0.0534239	0.0117431	5.77936e-06	14306	ebi-a-GCST90016970	rs4957061	T	C		|| id:ebi-a-GCST90016970	TRUE	reported	igd
genus	5	142793467	-0.0953566	0.0209236	4.38157e-06	14306	ebi-a-GCST90016970	rs73797465	T	G		|| id:ebi-a-GCST90016970	TRUE	reported	igd
genus	5	169748189	-0.0846055	0.0184003	3.95667e-06	14306	ebi-a-GCST90016970	rs76671854	C	G		|| id:ebi-a-GCST90016970	TRUE	reported	igd
genus	6	14617591	0.0558234	0.0121219	3.571e-06	14306	ebi-a-GCST90016970	rs857444	C	T		|| id:ebi-a-GCST90016970	TRUE	reported	igd
genus	7	48090746	-0.070741	0.0157926	7.49894e-06	14306	ebi-a-GCST90016970	rs2686790	C	T		|| id:ebi-a-GCST90016970	TRUE	reported	igd
genus	10	126089703	-0.0712624	0.015983	8.04711e-06	14306	ebi-a-GCST90016970	rs2491158	A	G		|| id:ebi-a-GCST90016970	TRUE	reported	igd
genus	12	20378911	-0.0624207	0.0129438	1.6452e-06	14306	ebi-a-GCST90016970	rs10841473	G	C		|| id:ebi-a-GCST90016970	TRUE	reported	igd
genus	13	112859829	0.112428	0.0201813	1.08368e-08	14306	ebi-a-GCST90016970	rs7322849	T	C		|| id:ebi-a-GCST90016970	TRUE	reported	igd
genus	17	72897722	-0.0637641	0.0138746	5.19457e-06	14306	ebi-a-GCST90016970	rs540489	T	G		|| id:ebi-a-GCST90016970	TRUE	reported	igd
genus	21	31861790	0.232354	0.0505979	4.86351e-06	14306	ebi-a-GCST90016970	rs75344046	C	T		|| id:ebi-a-GCST90016970	TRUE	reported	igd
genus	22	18354272	-0.0536216	0.0120801	8.99953e-06	14306	ebi-a-GCST90016970	rs5746486	T	C		|| id:ebi-a-GCST90016970	TRUE	reported	igd
genus	1	103299921	-0.0692654	0.0150148	4.24033e-06	14306	ebi-a-GCST90016971	rs1241171	G	A		|| id:ebi-a-GCST90016971	TRUE	reported	igd
genus	3	194419531	-0.112729	0.0241633	3.11322e-06	14306	ebi-a-GCST90016971	rs6793291	A	C		|| id:ebi-a-GCST90016971	TRUE	reported	igd
genus	6	20505628	0.128112	0.0261358	8.62323e-07	14306	ebi-a-GCST90016971	rs116261629	G	C		|| id:ebi-a-GCST90016971	TRUE	reported	igd
genus	7	9510367	-0.0617228	0.0140174	8.63257e-06	14306	ebi-a-GCST90016971	rs2713349	T	A		|| id:ebi-a-GCST90016971	TRUE	reported	igd
genus	7	47211732	0.0627416	0.0139456	6.33257e-06	14306	ebi-a-GCST90016971	rs2728491	T	G		|| id:ebi-a-GCST90016971	TRUE	reported	igd
genus	7	138583840	-0.0670097	0.0137701	1.76954e-06	14306	ebi-a-GCST90016971	rs7802841	A	C		|| id:ebi-a-GCST90016971	TRUE	reported	igd
genus	7	123174986	0.118509	0.026742	7.36953e-06	14306	ebi-a-GCST90016971	rs1917709	A	T		|| id:ebi-a-GCST90016971	TRUE	reported	igd
genus	8	109990939	0.123209	0.026882	5.62264e-06	14306	ebi-a-GCST90016971	rs72676854	T	C		|| id:ebi-a-GCST90016971	TRUE	reported	igd
genus	8	90878338	-0.0624818	0.0141485	8.0562e-06	14306	ebi-a-GCST90016971	rs60178956	G	A		|| id:ebi-a-GCST90016971	TRUE	reported	igd
genus	9	4940871	-0.0826826	0.0170621	1.1229e-06	14306	ebi-a-GCST90016971	rs1571225	T	C		|| id:ebi-a-GCST90016971	TRUE	reported	igd
genus	12	100786847	-0.0564589	0.0126935	9.07215e-06	14306	ebi-a-GCST90016971	rs1969927	A	G		|| id:ebi-a-GCST90016971	TRUE	reported	igd
genus	13	102402685	0.0680947	0.015503	7.71543e-06	14306	ebi-a-GCST90016971	rs11069458	C	T		|| id:ebi-a-GCST90016971	TRUE	reported	igd
genus	14	67640571	-0.0571991	0.0125673	5.47533e-06	14306	ebi-a-GCST90016971	rs8013541	A	T		|| id:ebi-a-GCST90016971	TRUE	reported	igd
genus	15	50011554	-0.0613623	0.0133436	4.70945e-06	14306	ebi-a-GCST90016971	rs542415	T	C		|| id:ebi-a-GCST90016971	TRUE	reported	igd
genus	17	9121579	-0.102702	0.0233878	9.06692e-06	14306	ebi-a-GCST90016971	rs9899990	A	G		|| id:ebi-a-GCST90016971	TRUE	reported	igd
genus	18	3765773	0.073288	0.016799	7.14661e-06	14306	ebi-a-GCST90016971	rs4798126	G	A		|| id:ebi-a-GCST90016971	TRUE	reported	igd
genus	20	61980991	0.0766479	0.0160642	1.78875e-06	14306	ebi-a-GCST90016971	rs3827020	C	T		|| id:ebi-a-GCST90016971	TRUE	reported	igd
genus	1	219117743	0.0575596	0.0133492	7.16391e-06	14306	ebi-a-GCST90016972	rs2788271	G	T		|| id:ebi-a-GCST90016972	TRUE	reported	igd
genus	1	175757311	-0.206605	0.043992	5.18597e-06	14306	ebi-a-GCST90016972	rs115043014	G	A		|| id:ebi-a-GCST90016972	TRUE	reported	igd
genus	1	224688107	-0.112197	0.023186	1.36848e-06	14306	ebi-a-GCST90016976	rs4294381	C	T		|| id:ebi-a-GCST90016976	TRUE	reported	igd
genus	2	19885907	-0.0892075	0.0195401	5.94799e-06	14306	ebi-a-GCST90016976	rs9973954	G	A		|| id:ebi-a-GCST90016976	TRUE	reported	igd
genus	3	137945192	0.0986136	0.0215646	5.53184e-06	14306	ebi-a-GCST90016976	rs4678258	T	C		|| id:ebi-a-GCST90016976	TRUE	reported	igd
genus	3	190349049	0.228255	0.0509241	9.4554e-06	14306	ebi-a-GCST90016976	rs2193878	T	A		|| id:ebi-a-GCST90016976	TRUE	reported	igd
genus	4	52935445	-0.0813853	0.0182696	7.67644e-06	14306	ebi-a-GCST90016976	rs12500231	T	A		|| id:ebi-a-GCST90016976	TRUE	reported	igd
genus	5	172758774	0.0819131	0.018185	9.2289e-06	14306	ebi-a-GCST90016976	rs6881988	C	G		|| id:ebi-a-GCST90016976	TRUE	reported	igd
genus	6	109376647	-0.12805	0.0285446	4.4152e-06	14306	ebi-a-GCST90016976	rs11153159	G	C		|| id:ebi-a-GCST90016976	TRUE	reported	igd
genus	7	352368	-0.104966	0.0240995	5.4114e-06	14306	ebi-a-GCST90016976	rs36155147	T	C		|| id:ebi-a-GCST90016976	TRUE	reported	igd
genus	8	123882833	-0.092834	0.0199807	3.64083e-06	14306	ebi-a-GCST90016976	rs10108780	A	G		|| id:ebi-a-GCST90016976	TRUE	reported	igd
genus	8	138638199	0.0834413	0.0180989	4.17311e-06	14306	ebi-a-GCST90016976	rs10090365	G	A		|| id:ebi-a-GCST90016976	TRUE	reported	igd
genus	9	10611282	-0.0834858	0.0182426	5.4718e-06	14306	ebi-a-GCST90016976	rs10809135	C	T		|| id:ebi-a-GCST90016976	TRUE	reported	igd
genus	10	82879688	-0.0818459	0.0180086	8.33067e-06	14306	ebi-a-GCST90016976	rs386526	G	C		|| id:ebi-a-GCST90016976	TRUE	reported	igd
genus	12	115352769	-0.0840437	0.0187031	7.88787e-06	14306	ebi-a-GCST90016976	rs6489992	A	G		|| id:ebi-a-GCST90016976	TRUE	reported	igd
genus	14	76403542	0.0951085	0.0212799	9.29458e-06	14306	ebi-a-GCST90016976	rs7400877	C	T		|| id:ebi-a-GCST90016976	TRUE	reported	igd
genus	15	62394540	-0.0969304	0.0214221	5.80056e-06	14306	ebi-a-GCST90016976	rs6494306	A	G		|| id:ebi-a-GCST90016976	TRUE	reported	igd
genus	19	47985753	-0.194561	0.0347932	4.25608e-08	14306	ebi-a-GCST90016976	rs830151	A	G		|| id:ebi-a-GCST90016976	TRUE	reported	igd
genus	1	88233128	0.129218	0.0264518	1.00907e-06	14306	ebi-a-GCST90016982	rs305411	A	G		|| id:ebi-a-GCST90016982	TRUE	reported	igd
genus	2	137223458	0.0921817	0.0209405	8.07644e-06	14306	ebi-a-GCST90016982	rs12996055	A	C		|| id:ebi-a-GCST90016982	TRUE	reported	igd
genus	2	32242452	0.125703	0.0276296	5.76328e-06	14306	ebi-a-GCST90016982	rs74919520	G	A		|| id:ebi-a-GCST90016982	TRUE	reported	igd
genus	3	46483717	-0.0912179	0.019569	2.88975e-06	14306	ebi-a-GCST90016982	rs3828477	G	T		|| id:ebi-a-GCST90016982	TRUE	reported	igd
genus	4	34852443	-0.193354	0.0413815	2.73691e-06	14306	ebi-a-GCST90016982	rs55672356	T	A		|| id:ebi-a-GCST90016982	TRUE	reported	igd
genus	4	96389240	0.110695	0.0251199	9.55675e-06	14306	ebi-a-GCST90016982	rs28402691	T	C		|| id:ebi-a-GCST90016982	TRUE	reported	igd
genus	4	3852385	0.21591	0.0493019	9.12599e-06	14306	ebi-a-GCST90016982	rs76001613	C	G		|| id:ebi-a-GCST90016982	TRUE	reported	igd
genus	6	4714797	-0.147365	0.0319978	4.75762e-06	14306	ebi-a-GCST90016982	rs72821405	T	C		|| id:ebi-a-GCST90016982	TRUE	reported	igd
genus	6	97234939	0.0887412	0.0188377	2.34882e-06	14306	ebi-a-GCST90016982	rs213863	T	C		|| id:ebi-a-GCST90016982	TRUE	reported	igd
genus	9	137784868	0.100827	0.0220366	6.10183e-06	14306	ebi-a-GCST90016982	rs12684609	T	C		|| id:ebi-a-GCST90016982	TRUE	reported	igd
genus	11	103549974	0.253264	0.0540141	3.07249e-06	14306	ebi-a-GCST90016982	rs143662916	C	T		|| id:ebi-a-GCST90016982	TRUE	reported	igd
genus	12	98289796	-0.103931	0.0226826	5.71189e-06	14306	ebi-a-GCST90016982	rs11532348	C	T		|| id:ebi-a-GCST90016982	TRUE	reported	igd
genus	15	91166608	-0.0899597	0.020001	5.51049e-06	14306	ebi-a-GCST90016982	rs5011652	C	G		|| id:ebi-a-GCST90016982	TRUE	reported	igd
genus	20	57574851	0.0781125	0.0171916	6.26297e-06	14306	ebi-a-GCST90016982	rs189356	G	A		|| id:ebi-a-GCST90016982	TRUE	reported	igd
genus	1	149998497	0.0596434	0.0129279	4.32245e-06	14306	ebi-a-GCST90016985	rs7521171	A	G		|| id:ebi-a-GCST90016985	TRUE	reported	igd
genus	2	240727657	-0.0709302	0.0150918	2.20318e-06	14306	ebi-a-GCST90016985	rs13394391	C	T		|| id:ebi-a-GCST90016985	TRUE	reported	igd
genus	7	76357726	0.051211	0.0113031	7.32605e-06	14306	ebi-a-GCST90016985	rs13247359	G	A		|| id:ebi-a-GCST90016985	TRUE	reported	igd
genus	8	4128340	-0.0582385	0.0115052	4.17561e-07	14306	ebi-a-GCST90016985	rs62481985	G	C		|| id:ebi-a-GCST90016985	TRUE	reported	igd
genus	9	13799809	-0.0515518	0.0115923	9.27428e-06	14306	ebi-a-GCST90016985	rs10810043	G	A		|| id:ebi-a-GCST90016985	TRUE	reported	igd
genus	14	99141751	-0.0619514	0.0137787	7.04288e-06	14306	ebi-a-GCST90016985	rs4575475	A	G		|| id:ebi-a-GCST90016985	TRUE	reported	igd
genus	17	26104511	0.0516921	0.0113054	4.78696e-06	14306	ebi-a-GCST90016985	rs11080344	C	T		|| id:ebi-a-GCST90016985	TRUE	reported	igd
genus	17	76343961	0.0645443	0.0148833	9.63607e-06	14306	ebi-a-GCST90016985	rs11077359	C	T		|| id:ebi-a-GCST90016985	TRUE	reported	igd
genus	19	40032132	0.0577411	0.0113476	4.16457e-07	14306	ebi-a-GCST90016985	rs8100692	T	C		|| id:ebi-a-GCST90016985	TRUE	reported	igd
genus	22	21331556	-0.145257	0.0294239	7.81088e-07	14306	ebi-a-GCST90016985	rs178271	C	T		|| id:ebi-a-GCST90016985	TRUE	reported	igd
genus	3	6826520	0.0497368	0.0112621	8.80055e-06	14306	ebi-a-GCST90016989	rs345219	G	T		|| id:ebi-a-GCST90016989	TRUE	reported	igd
genus	4	60992340	-0.0697217	0.0150285	4.56688e-06	14306	ebi-a-GCST90016989	rs1899291	T	C		|| id:ebi-a-GCST90016989	TRUE	reported	igd
genus	6	25078050	-0.13745	0.0299983	3.16738e-06	14306	ebi-a-GCST90016989	rs73729431	C	T		|| id:ebi-a-GCST90016989	TRUE	reported	igd
genus	6	116078810	0.0881722	0.0193683	5.33126e-06	14306	ebi-a-GCST90016989	rs12216169	T	A		|| id:ebi-a-GCST90016989	TRUE	reported	igd
genus	6	74605806	-0.0516127	0.0112852	5.28701e-06	14306	ebi-a-GCST90016989	rs3005511	G	A		|| id:ebi-a-GCST90016989	TRUE	reported	igd
genus	7	154978183	-0.055544	0.0125223	9.15145e-06	14306	ebi-a-GCST90016989	rs12537781	T	C		|| id:ebi-a-GCST90016989	TRUE	reported	igd
genus	8	15768657	-0.0974091	0.0194379	7.46603e-07	14306	ebi-a-GCST90016989	rs62503162	A	G		|| id:ebi-a-GCST90016989	TRUE	reported	igd
genus	8	127905865	0.0715309	0.0150878	2.25284e-06	14306	ebi-a-GCST90016989	rs13279148	G	A		|| id:ebi-a-GCST90016989	TRUE	reported	igd
genus	9	106815466	-0.0634136	0.0142227	5.77511e-06	14306	ebi-a-GCST90016989	rs62583469	T	A		|| id:ebi-a-GCST90016989	TRUE	reported	igd
genus	11	8729057	0.163846	0.036608	7.68051e-06	14306	ebi-a-GCST90016989	rs3752849	G	A		|| id:ebi-a-GCST90016989	TRUE	reported	igd
genus	16	81803497	-0.0488254	0.0109063	7.05781e-06	14306	ebi-a-GCST90016989	rs11150408	G	T		|| id:ebi-a-GCST90016989	TRUE	reported	igd
genus	17	70733523	0.0574165	0.0122472	4.00691e-06	14306	ebi-a-GCST90016989	rs4793307	C	T		|| id:ebi-a-GCST90016989	TRUE	reported	igd
genus	1	167818597	0.142548	0.0320688	9.09411e-06	14306	ebi-a-GCST90016993	rs61806970	C	T		|| id:ebi-a-GCST90016993	TRUE	reported	igd
genus	1	42333631	-0.143381	0.0281514	6.33126e-07	14306	ebi-a-GCST90016993	rs710230	C	T		|| id:ebi-a-GCST90016993	TRUE	reported	igd
genus	2	34595533	-0.0684526	0.0152443	6.85299e-06	14306	ebi-a-GCST90016993	rs1434153	G	A		|| id:ebi-a-GCST90016993	TRUE	reported	igd
genus	4	25446787	-0.0810636	0.0163308	7.59347e-07	14306	ebi-a-GCST90016993	rs4697572	A	G		|| id:ebi-a-GCST90016993	TRUE	reported	igd
genus	5	34892042	-0.0740482	0.0158891	3.74938e-06	14306	ebi-a-GCST90016993	rs340991	A	G		|| id:ebi-a-GCST90016993	TRUE	reported	igd
genus	5	77815056	0.0662914	0.0144203	4.58606e-06	14306	ebi-a-GCST90016993	rs17804233	C	T		|| id:ebi-a-GCST90016993	TRUE	reported	igd
genus	6	24292185	0.14147	0.0336352	9.85281e-06	14306	ebi-a-GCST90016993	rs3804326	A	G		|| id:ebi-a-GCST90016993	TRUE	reported	igd
genus	8	38780606	-0.067015	0.0143201	3.01544e-06	14306	ebi-a-GCST90016993	rs6474512	C	A		|| id:ebi-a-GCST90016993	TRUE	reported	igd
genus	9	90586043	-0.0668051	0.0143224	3.68154e-06	14306	ebi-a-GCST90016993	rs622418	A	G		|| id:ebi-a-GCST90016993	TRUE	reported	igd
genus	10	36394609	-0.0968026	0.0217883	6.0431e-06	14306	ebi-a-GCST90016993	rs16936671	C	T		|| id:ebi-a-GCST90016993	TRUE	reported	igd
genus	11	121876913	-0.111157	0.0234426	2.16118e-06	14306	ebi-a-GCST90016993	rs58236560	G	T		|| id:ebi-a-GCST90016993	TRUE	reported	igd
genus	11	36871523	-0.0641339	0.0144295	8.79468e-06	14306	ebi-a-GCST90016993	rs2901723	A	C		|| id:ebi-a-GCST90016993	TRUE	reported	igd
genus	13	46372065	0.0646003	0.0143479	6.39043e-06	14306	ebi-a-GCST90016993	rs9590927	A	G		|| id:ebi-a-GCST90016993	TRUE	reported	igd
genus	17	10177708	-0.0839861	0.0142741	4.30953e-09	14306	ebi-a-GCST90016993	rs7221249	G	A		|| id:ebi-a-GCST90016993	TRUE	reported	igd
genus	17	71411325	-0.0875551	0.0195556	6.12703e-06	14306	ebi-a-GCST90016993	rs34528142	C	G		|| id:ebi-a-GCST90016993	TRUE	reported	igd
genus	19	55857777	-0.0687134	0.0151835	7.66161e-06	14306	ebi-a-GCST90016993	rs45480394	T	G		|| id:ebi-a-GCST90016993	TRUE	reported	igd
genus	1	48961903	-0.100851	0.0222045	8.24499e-06	14306	ebi-a-GCST90016995	rs2798105	A	G		|| id:ebi-a-GCST90016995	TRUE	reported	igd
genus	2	236515155	0.0626172	0.0139919	9.70465e-06	14306	ebi-a-GCST90016995	rs57024273	T	C		|| id:ebi-a-GCST90016995	TRUE	reported	igd
genus	3	3173016	0.075657	0.0164155	5.87273e-06	14306	ebi-a-GCST90016995	rs11706043	T	A		|| id:ebi-a-GCST90016995	TRUE	reported	igd
genus	5	79863544	0.0594401	0.013598	7.99558e-06	14306	ebi-a-GCST90016995	rs118526	A	C		|| id:ebi-a-GCST90016995	TRUE	reported	igd
genus	7	140678199	0.172283	0.038041	5.27716e-06	14306	ebi-a-GCST90016995	rs113513883	A	G		|| id:ebi-a-GCST90016995	TRUE	reported	igd
genus	7	128054100	-0.0609885	0.0135157	7.47309e-06	14306	ebi-a-GCST90016995	rs4731451	G	A		|| id:ebi-a-GCST90016995	TRUE	reported	igd
genus	7	31136897	0.115505	0.0237628	1.42479e-06	14306	ebi-a-GCST90016995	rs2267739	G	C		|| id:ebi-a-GCST90016995	TRUE	reported	igd
genus	9	136179347	-0.0592004	0.0129486	4.76925e-06	14306	ebi-a-GCST90016995	rs592299	T	C		|| id:ebi-a-GCST90016995	TRUE	reported	igd
genus	10	69394914	0.117362	0.0264533	9.65028e-06	14306	ebi-a-GCST90016995	rs117092367	A	T		|| id:ebi-a-GCST90016995	TRUE	reported	igd
genus	11	134774845	0.0613376	0.0130644	3.03753e-06	14306	ebi-a-GCST90016995	rs1154904	G	A		|| id:ebi-a-GCST90016995	TRUE	reported	igd
genus	13	23253392	0.151009	0.0323434	3.3335e-06	14306	ebi-a-GCST90016995	rs113127095	A	G		|| id:ebi-a-GCST90016995	TRUE	reported	igd
genus	16	77711641	0.101976	0.0222883	4.92334e-06	14306	ebi-a-GCST90016995	rs35555519	C	G		|| id:ebi-a-GCST90016995	TRUE	reported	igd
genus	16	3750623	0.0732963	0.0163589	8.20635e-06	14306	ebi-a-GCST90016995	rs112767262	T	C		|| id:ebi-a-GCST90016995	TRUE	reported	igd
genus	17	14173290	-0.136384	0.0302576	5.90391e-06	14306	ebi-a-GCST90016995	rs7502686	G	C		|| id:ebi-a-GCST90016995	TRUE	reported	igd
genus	21	39324484	-0.119296	0.024839	2.19392e-06	14306	ebi-a-GCST90016995	rs73208162	A	G		|| id:ebi-a-GCST90016995	TRUE	reported	igd
genus	2	218237281	-0.101329	0.0227324	9.27043e-06	14306	ebi-a-GCST90016996	rs12151423	G	A		|| id:ebi-a-GCST90016996	TRUE	reported	igd
genus	4	184628931	-0.104806	0.0225751	3.73147e-06	14306	ebi-a-GCST90016996	rs4862235	A	G		|| id:ebi-a-GCST90016996	TRUE	reported	igd
genus	4	6856564	-0.236717	0.0531335	8.1553e-06	14306	ebi-a-GCST90016996	rs73199919	T	C		|| id:ebi-a-GCST90016996	TRUE	reported	igd
genus	4	144665178	-0.145997	0.0327192	7.96746e-06	14306	ebi-a-GCST90016996	rs13139592	T	C		|| id:ebi-a-GCST90016996	TRUE	reported	igd
genus	5	17460096	-0.201481	0.043286	3.7812e-06	14306	ebi-a-GCST90016996	rs62348779	T	C		|| id:ebi-a-GCST90016996	TRUE	reported	igd
genus	10	22892667	-0.105143	0.022942	4.55806e-06	14306	ebi-a-GCST90016996	rs2913110	T	C		|| id:ebi-a-GCST90016996	TRUE	reported	igd
genus	10	94185213	-0.170873	0.0362844	2.38035e-06	14306	ebi-a-GCST90016996	rs112617308	T	C		|| id:ebi-a-GCST90016996	TRUE	reported	igd
genus	11	80236833	-0.108225	0.0240319	7.34345e-06	14306	ebi-a-GCST90016996	rs6591893	A	G		|| id:ebi-a-GCST90016996	TRUE	reported	igd
genus	14	23060552	-0.120888	0.0266264	6.99294e-06	14306	ebi-a-GCST90016996	rs1384962	G	A		|| id:ebi-a-GCST90016996	TRUE	reported	igd
genus	22	48190598	0.111927	0.0251252	7.0283e-06	14306	ebi-a-GCST90016996	rs720439	G	A		|| id:ebi-a-GCST90016996	TRUE	reported	igd
genus	22	26922534	-0.238718	0.0528561	4.98781e-06	14306	ebi-a-GCST90016996	rs9613196	T	A		|| id:ebi-a-GCST90016996	TRUE	reported	igd
genus	1	200638489	0.0783322	0.0174719	2.62198e-06	14306	ebi-a-GCST90016997	rs115325767	G	C		|| id:ebi-a-GCST90016997	TRUE	reported	igd
genus	2	50797401	-0.0641017	0.0141153	8.61807e-06	14306	ebi-a-GCST90016997	rs79895140	T	C		|| id:ebi-a-GCST90016997	TRUE	reported	igd
genus	3	127139574	-0.0521584	0.0112353	4.26108e-06	14306	ebi-a-GCST90016997	rs6762473	A	C		|| id:ebi-a-GCST90016997	TRUE	reported	igd
genus	3	113794507	0.0630776	0.0144485	9.26254e-06	14306	ebi-a-GCST90016997	rs11720857	C	T		|| id:ebi-a-GCST90016997	TRUE	reported	igd
genus	3	81595477	0.123055	0.0266375	4.78983e-06	14306	ebi-a-GCST90016997	rs76898927	G	A		|| id:ebi-a-GCST90016997	TRUE	reported	igd
genus	7	33603146	-0.0590705	0.0132929	8.88976e-06	14306	ebi-a-GCST90016997	rs1020520	T	G		|| id:ebi-a-GCST90016997	TRUE	reported	igd
genus	7	31085162	0.0962228	0.0168388	1.03786e-08	14306	ebi-a-GCST90016997	rs17159861	C	T		|| id:ebi-a-GCST90016997	TRUE	reported	igd
genus	7	73306506	-0.0786783	0.0174038	9.1772e-06	14306	ebi-a-GCST90016997	rs4717831	T	A		|| id:ebi-a-GCST90016997	TRUE	reported	igd
genus	7	16380806	-0.0828719	0.016431	2.52029e-07	14306	ebi-a-GCST90016997	rs9648214	T	C		|| id:ebi-a-GCST90016997	TRUE	reported	igd
genus	10	84506096	-0.0538845	0.0121245	9.85644e-06	14306	ebi-a-GCST90016997	rs2644213	A	G		|| id:ebi-a-GCST90016997	TRUE	reported	igd
genus	10	2215931	-0.0505823	0.0113455	5.98467e-06	14306	ebi-a-GCST90016997	rs10444197	A	G		|| id:ebi-a-GCST90016997	TRUE	reported	igd
genus	12	32713919	-0.0477832	0.0107833	9.37951e-06	14306	ebi-a-GCST90016997	rs11052069	C	T		|| id:ebi-a-GCST90016997	TRUE	reported	igd
genus	15	36911598	-0.0533159	0.0115935	4.348e-06	14306	ebi-a-GCST90016997	rs12906958	C	T		|| id:ebi-a-GCST90016997	TRUE	reported	igd
genus	15	97869293	-0.0769698	0.0172101	7.50205e-06	14306	ebi-a-GCST90016997	rs62024432	C	T		|| id:ebi-a-GCST90016997	TRUE	reported	igd
genus	15	86440997	-0.0515152	0.0110294	1.98976e-06	14306	ebi-a-GCST90016997	rs4076415	G	T		|| id:ebi-a-GCST90016997	TRUE	reported	igd
genus	2	115197171	0.155659	0.0375612	3.13914e-06	14306	ebi-a-GCST90016998	rs72839198	C	G		|| id:ebi-a-GCST90016998	TRUE	reported	igd
genus	2	110260993	-0.123093	0.0282743	9.14282e-06	14306	ebi-a-GCST90016998	rs56080211	T	C		|| id:ebi-a-GCST90016998	TRUE	reported	igd
genus	4	42836822	-0.0877679	0.0197674	5.93636e-06	14306	ebi-a-GCST90016998	rs11730852	A	C		|| id:ebi-a-GCST90016998	TRUE	reported	igd
genus	6	70956815	0.103268	0.0229525	4.87405e-06	14306	ebi-a-GCST90016998	rs6923695	T	G		|| id:ebi-a-GCST90016998	TRUE	reported	igd
genus	7	51365152	0.0916626	0.0208183	7.11771e-06	14306	ebi-a-GCST90016998	rs12719051	A	G		|| id:ebi-a-GCST90016998	TRUE	reported	igd
genus	10	83092007	-0.0563756	0.0120127	2.26757e-06	14306	ebi-a-GCST90016998	rs265534	T	G		|| id:ebi-a-GCST90016998	TRUE	reported	igd
genus	11	31098691	-0.0824941	0.0195615	8.39827e-06	14306	ebi-a-GCST90016998	rs182318	G	A		|| id:ebi-a-GCST90016998	TRUE	reported	igd
genus	13	107563458	-0.0888825	0.0198479	5.29724e-06	14306	ebi-a-GCST90016998	rs2200429	A	G		|| id:ebi-a-GCST90016998	TRUE	reported	igd
genus	14	77619186	0.0915271	0.0190611	9.74182e-06	14306	ebi-a-GCST90016998	rs158115	G	C		|| id:ebi-a-GCST90016998	TRUE	reported	igd
genus	14	39301409	-0.196454	0.042565	4.24502e-06	14306	ebi-a-GCST90016998	rs74606150	C	G		|| id:ebi-a-GCST90016998	TRUE	reported	igd
genus	16	81820486	0.0670205	0.0128122	2.83851e-07	14306	ebi-a-GCST90016998	rs4583233	A	C		|| id:ebi-a-GCST90016998	TRUE	reported	igd
genus	1	88523399	0.0726438	0.0160924	6.79548e-06	14306	ebi-a-GCST90017004	rs10923018	G	A		|| id:ebi-a-GCST90017004	TRUE	reported	igd
genus	1	3044181	-0.0734306	0.0163687	7.86955e-06	14306	ebi-a-GCST90017004	rs2817174	C	T		|| id:ebi-a-GCST90017004	TRUE	reported	igd
genus	1	197978281	0.0888124	0.0196447	6.37984e-06	14306	ebi-a-GCST90017004	rs6676699	T	G		|| id:ebi-a-GCST90017004	TRUE	reported	igd
genus	2	71247578	-0.0748879	0.0165852	6.17248e-06	14306	ebi-a-GCST90017004	rs2418654	C	T		|| id:ebi-a-GCST90017004	TRUE	reported	igd
genus	2	201610645	0.0737077	0.0163786	6.96835e-06	14306	ebi-a-GCST90017004	rs13025464	C	T		|| id:ebi-a-GCST90017004	TRUE	reported	igd
genus	5	121182996	0.0911461	0.0182353	4.67369e-07	14306	ebi-a-GCST90017004	rs2116427	A	G		|| id:ebi-a-GCST90017004	TRUE	reported	igd
genus	5	33897589	-0.174787	0.0390573	2.38122e-06	14306	ebi-a-GCST90017004	rs16891896	G	A		|| id:ebi-a-GCST90017004	TRUE	reported	igd
genus	6	11953633	-0.103488	0.0236391	9.23145e-06	14306	ebi-a-GCST90017004	rs209813	G	A		|| id:ebi-a-GCST90017004	TRUE	reported	igd
genus	6	130030114	-0.0979429	0.0212166	4.93276e-06	14306	ebi-a-GCST90017004	rs57340348	T	C		|| id:ebi-a-GCST90017004	TRUE	reported	igd
genus	8	138626268	0.0762282	0.016523	4.06846e-06	14306	ebi-a-GCST90017004	rs7000472	G	A		|| id:ebi-a-GCST90017004	TRUE	reported	igd
genus	9	130980937	0.153538	0.0323922	2.15894e-06	14306	ebi-a-GCST90017004	rs2229917	A	G		|| id:ebi-a-GCST90017004	TRUE	reported	igd
genus	9	2539358	-0.0833243	0.018056	4.81637e-06	14306	ebi-a-GCST90017004	rs606117	G	A		|| id:ebi-a-GCST90017004	TRUE	reported	igd
genus	10	129037453	-0.139825	0.030069	2.62126e-06	14306	ebi-a-GCST90017004	rs72836424	C	T		|| id:ebi-a-GCST90017004	TRUE	reported	igd
genus	12	30360954	0.107804	0.0233984	4.7036e-06	14306	ebi-a-GCST90017004	rs17519472	C	T		|| id:ebi-a-GCST90017004	TRUE	reported	igd
genus	12	63306003	-0.115098	0.0247909	5.36204e-06	14306	ebi-a-GCST90017004	rs73139629	A	C		|| id:ebi-a-GCST90017004	TRUE	reported	igd
genus	14	52219066	0.199832	0.0414577	2.38666e-06	14306	ebi-a-GCST90017004	rs10131724	C	A		|| id:ebi-a-GCST90017004	TRUE	reported	igd
genus	15	61289622	0.073258	0.0160888	5.43676e-06	14306	ebi-a-GCST90017004	rs11637981	T	G		|| id:ebi-a-GCST90017004	TRUE	reported	igd
genus	22	25303055	-0.0845439	0.0171791	8.58836e-07	14306	ebi-a-GCST90017004	rs139749	C	T		|| id:ebi-a-GCST90017004	TRUE	reported	igd
genus	22	48749548	0.143141	0.0293757	5.8217e-06	14306	ebi-a-GCST90017004	rs112375806	T	A		|| id:ebi-a-GCST90017004	TRUE	reported	igd
genus	1	14201546	0.0641305	0.0149933	8.80278e-06	14306	ebi-a-GCST90017007	rs12753492	A	C		|| id:ebi-a-GCST90017007	TRUE	reported	igd
genus	1	245267339	-0.232262	0.0512364	7.01892e-06	14306	ebi-a-GCST90017007	rs10927394	G	T		|| id:ebi-a-GCST90017007	TRUE	reported	igd
genus	1	111036827	0.145631	0.0323019	8.13561e-06	14306	ebi-a-GCST90017007	rs79656633	T	C		|| id:ebi-a-GCST90017007	TRUE	reported	igd
genus	2	37125235	-0.0861565	0.01896	5.69574e-06	14306	ebi-a-GCST90017007	rs114946999	C	T		|| id:ebi-a-GCST90017007	TRUE	reported	igd
genus	6	131587157	-0.134864	0.0277032	1.37848e-06	14306	ebi-a-GCST90017007	rs6910935	G	A		|| id:ebi-a-GCST90017007	TRUE	reported	igd
genus	8	38593645	-0.078354	0.017183	6.39676e-06	14306	ebi-a-GCST90017007	rs11776390	T	C		|| id:ebi-a-GCST90017007	TRUE	reported	igd
genus	10	128614990	0.0817953	0.018369	9.18015e-06	14306	ebi-a-GCST90017007	rs61875484	C	G		|| id:ebi-a-GCST90017007	TRUE	reported	igd
genus	12	83502773	0.094833	0.0163962	7.56955e-09	14306	ebi-a-GCST90017007	rs12320842	C	G		|| id:ebi-a-GCST90017007	TRUE	reported	igd
genus	13	53567017	-0.048317	0.010797	5.33261e-06	14306	ebi-a-GCST90017007	rs9536330	T	C		|| id:ebi-a-GCST90017007	TRUE	reported	igd
genus	14	64044097	-0.0576251	0.0119649	1.3017e-06	14306	ebi-a-GCST90017007	rs1271565	C	T		|| id:ebi-a-GCST90017007	TRUE	reported	igd
genus	15	47404021	0.0504817	0.0109368	3.66454e-06	14306	ebi-a-GCST90017007	rs28376661	C	G		|| id:ebi-a-GCST90017007	TRUE	reported	igd
genus	16	6099863	0.227585	0.0465522	1.76449e-06	14306	ebi-a-GCST90017007	rs75499067	C	T		|| id:ebi-a-GCST90017007	TRUE	reported	igd
genus	21	39027901	-0.0866356	0.0196496	7.54397e-06	14306	ebi-a-GCST90017007	rs2835874	T	C		|| id:ebi-a-GCST90017007	TRUE	reported	igd
genus	1	237351354	-0.116063	0.0241012	2.07348e-06	14306	ebi-a-GCST90017010	rs11811696	T	C		|| id:ebi-a-GCST90017010	TRUE	reported	igd
genus	1	102287083	0.0942719	0.0211646	9.37195e-06	14306	ebi-a-GCST90017010	rs12038887	C	G		|| id:ebi-a-GCST90017010	TRUE	reported	igd
genus	1	77887835	0.0692276	0.0137467	5.60841e-07	14306	ebi-a-GCST90017010	rs12030302	G	A		|| id:ebi-a-GCST90017010	TRUE	reported	igd
genus	2	50201547	0.0833919	0.0184596	8.10905e-06	14306	ebi-a-GCST90017010	rs6761463	C	G		|| id:ebi-a-GCST90017010	TRUE	reported	igd
genus	5	168218403	-0.130067	0.0294087	7.12525e-06	14306	ebi-a-GCST90017010	rs114873521	C	T		|| id:ebi-a-GCST90017010	TRUE	reported	igd
genus	10	32381186	-0.0667272	0.0136557	1.17972e-06	14306	ebi-a-GCST90017010	rs806808	C	T		|| id:ebi-a-GCST90017010	TRUE	reported	igd
genus	11	44849689	0.0764294	0.0159789	1.52086e-06	14306	ebi-a-GCST90017010	rs34066017	A	G		|| id:ebi-a-GCST90017010	TRUE	reported	igd
genus	16	6696929	0.14686	0.0325191	6.6489e-06	14306	ebi-a-GCST90017010	rs11642826	G	C		|| id:ebi-a-GCST90017010	TRUE	reported	igd
genus	1	65153340	-0.107972	0.0231421	7.50136e-06	14306	ebi-a-GCST90017014	rs1926302	G	A		|| id:ebi-a-GCST90017014	TRUE	reported	igd
genus	3	85392882	0.0934832	0.0202886	7.29844e-06	14306	ebi-a-GCST90017014	rs35228298	G	A		|| id:ebi-a-GCST90017014	TRUE	reported	igd
genus	4	71000791	0.0903906	0.0195276	4.65479e-06	14306	ebi-a-GCST90017014	rs12513188	G	A		|| id:ebi-a-GCST90017014	TRUE	reported	igd
genus	6	163603171	-0.0959801	0.0179537	1.37775e-07	14306	ebi-a-GCST90017014	rs761624	G	C		|| id:ebi-a-GCST90017014	TRUE	reported	igd
genus	6	4148609	0.0854214	0.0172515	7.19449e-07	14306	ebi-a-GCST90017014	rs607782	C	T		|| id:ebi-a-GCST90017014	TRUE	reported	igd
genus	7	14728950	0.0954096	0.021093	5.34724e-06	14306	ebi-a-GCST90017014	rs1830029	G	C		|| id:ebi-a-GCST90017014	TRUE	reported	igd
genus	8	138623633	-0.104505	0.022601	5.13499e-06	14306	ebi-a-GCST90017014	rs34187114	C	A		|| id:ebi-a-GCST90017014	TRUE	reported	igd
genus	9	105004835	-0.0927334	0.0194435	2.10092e-06	14306	ebi-a-GCST90017014	rs4541991	T	C		|| id:ebi-a-GCST90017014	TRUE	reported	igd
genus	10	4494630	-0.283103	0.0598999	1.94272e-06	14306	ebi-a-GCST90017014	rs75764681	T	C		|| id:ebi-a-GCST90017014	TRUE	reported	igd
genus	10	125021315	0.0839384	0.0190567	7.87989e-06	14306	ebi-a-GCST90017014	rs12415649	G	C		|| id:ebi-a-GCST90017014	TRUE	reported	igd
genus	13	50932063	-0.227285	0.0510135	7.71951e-06	14306	ebi-a-GCST90017014	rs17586763	T	C		|| id:ebi-a-GCST90017014	TRUE	reported	igd
genus	19	7668225	-0.105447	0.0232029	5.53886e-06	14306	ebi-a-GCST90017014	rs62113381	T	C		|| id:ebi-a-GCST90017014	TRUE	reported	igd
genus	19	15020095	-0.0961669	0.0199336	1.36044e-06	14306	ebi-a-GCST90017014	rs73011279	T	C		|| id:ebi-a-GCST90017014	TRUE	reported	igd
genus	19	43851935	0.078999	0.01734	4.62392e-06	14306	ebi-a-GCST90017014	rs8113760	G	A		|| id:ebi-a-GCST90017014	TRUE	reported	igd
genus	1	72972799	-0.136779	0.0296811	4.02736e-06	14306	ebi-a-GCST90017016	rs61771805	A	T		|| id:ebi-a-GCST90017016	TRUE	reported	igd
genus	2	218819396	0.147035	0.034023	9.49708e-06	14306	ebi-a-GCST90017016	rs3791893	A	G		|| id:ebi-a-GCST90017016	TRUE	reported	igd
genus	4	169178315	-0.112045	0.0239328	3.34488e-06	14306	ebi-a-GCST90017016	rs609430	T	G		|| id:ebi-a-GCST90017016	TRUE	reported	igd
genus	7	93527414	-0.18123	0.0402987	4.70046e-06	14306	ebi-a-GCST90017016	rs36081916	T	C		|| id:ebi-a-GCST90017016	TRUE	reported	igd
genus	7	133154356	-0.169366	0.0352068	1.12323e-06	14306	ebi-a-GCST90017016	rs17167098	G	A		|| id:ebi-a-GCST90017016	TRUE	reported	igd
genus	11	77901287	-0.12718	0.0250924	6.5286e-07	14306	ebi-a-GCST90017016	rs901099	T	G		|| id:ebi-a-GCST90017016	TRUE	reported	igd
genus	14	95452797	0.192557	0.0420093	9.97034e-06	14306	ebi-a-GCST90017016	rs2154047	A	C		|| id:ebi-a-GCST90017016	TRUE	reported	igd
genus	15	98476920	-0.147352	0.0336531	8.58875e-06	14306	ebi-a-GCST90017016	rs10048062	C	T		|| id:ebi-a-GCST90017016	TRUE	reported	igd
genus	17	17253288	-0.105833	0.0228941	3.80391e-06	14306	ebi-a-GCST90017016	rs12452946	A	G		|| id:ebi-a-GCST90017016	TRUE	reported	igd
genus	18	60125134	0.164146	0.0349993	3.52468e-06	14306	ebi-a-GCST90017016	rs672217	G	A		|| id:ebi-a-GCST90017016	TRUE	reported	igd
genus	18	43206985	0.227831	0.046335	2.55918e-06	14306	ebi-a-GCST90017016	rs1484873	G	A		|| id:ebi-a-GCST90017016	TRUE	reported	igd
genus	4	166058998	-0.149725	0.0312777	1.74997e-06	14306	ebi-a-GCST90017017	rs13128780	T	C		|| id:ebi-a-GCST90017017	TRUE	reported	igd
genus	5	58424440	-0.139547	0.0316748	8.06659e-06	14306	ebi-a-GCST90017017	rs10044993	A	C		|| id:ebi-a-GCST90017017	TRUE	reported	igd
genus	8	14853525	-0.100023	0.0225883	9.6917e-06	14306	ebi-a-GCST90017017	rs13249325	T	G		|| id:ebi-a-GCST90017017	TRUE	reported	igd
genus	14	95973619	0.152235	0.0337867	7.37683e-06	14306	ebi-a-GCST90017017	rs17092615	G	A		|| id:ebi-a-GCST90017017	TRUE	reported	igd
genus	15	89577376	-0.126025	0.0282242	3.86091e-06	14306	ebi-a-GCST90017017	rs72759041	G	T		|| id:ebi-a-GCST90017017	TRUE	reported	igd
genus	1	240359089	0.062197	0.0125685	8.64868e-07	14306	ebi-a-GCST90017026	rs12747809	A	G		|| id:ebi-a-GCST90017026	TRUE	reported	igd
genus	1	65990422	0.05436	0.011947	5.56775e-06	14306	ebi-a-GCST90017026	rs6656451	T	C		|| id:ebi-a-GCST90017026	TRUE	reported	igd
genus	1	105287469	0.133104	0.0303566	7.07375e-06	14306	ebi-a-GCST90017026	rs12072562	T	C		|| id:ebi-a-GCST90017026	TRUE	reported	igd
genus	2	49904589	-0.0577091	0.0118338	1.20812e-06	14306	ebi-a-GCST90017026	rs2882478	G	A		|| id:ebi-a-GCST90017026	TRUE	reported	igd
genus	3	70592215	0.0648288	0.0140126	4.51742e-06	14306	ebi-a-GCST90017026	rs11128180	A	G		|| id:ebi-a-GCST90017026	TRUE	reported	igd
genus	3	154242406	0.108441	0.023825	5.77218e-06	14306	ebi-a-GCST90017026	rs7629954	A	G		|| id:ebi-a-GCST90017026	TRUE	reported	igd
genus	4	183247601	0.0548397	0.0120844	6.30406e-06	14306	ebi-a-GCST90017026	rs2726805	A	G		|| id:ebi-a-GCST90017026	TRUE	reported	igd
genus	6	14817584	0.0799088	0.017766	6.28463e-06	14306	ebi-a-GCST90017026	rs233486	G	A		|| id:ebi-a-GCST90017026	TRUE	reported	igd
genus	6	81318836	0.0542433	0.0118188	4.77079e-06	14306	ebi-a-GCST90017026	rs2444793	T	C		|| id:ebi-a-GCST90017026	TRUE	reported	igd
genus	7	71303007	0.0554351	0.0118375	2.98078e-06	14306	ebi-a-GCST90017026	rs12673420	G	A		|| id:ebi-a-GCST90017026	TRUE	reported	igd
genus	12	24572337	-0.109724	0.024221	4.86508e-06	14306	ebi-a-GCST90017026	rs35182105	A	G		|| id:ebi-a-GCST90017026	TRUE	reported	igd
genus	13	51292902	-0.0901399	0.0199712	9.83853e-06	14306	ebi-a-GCST90017026	rs2706242	G	C		|| id:ebi-a-GCST90017026	TRUE	reported	igd
genus	14	40536481	-0.0579792	0.0125229	4.3395e-06	14306	ebi-a-GCST90017026	rs12894272	G	A		|| id:ebi-a-GCST90017026	TRUE	reported	igd
genus	1	224897491	0.111884	0.0238893	2.5765e-06	14306	ebi-a-GCST90017028	rs72761829	A	T		|| id:ebi-a-GCST90017028	TRUE	reported	igd
genus	2	185862591	0.222263	0.0486425	5.68434e-06	14306	ebi-a-GCST90017028	rs72894957	G	A		|| id:ebi-a-GCST90017028	TRUE	reported	igd
genus	5	8146371	0.0779543	0.0171865	7.48411e-06	14306	ebi-a-GCST90017028	rs336138	G	T		|| id:ebi-a-GCST90017028	TRUE	reported	igd
genus	6	84772845	-0.0702357	0.015706	7.84603e-06	14306	ebi-a-GCST90017028	rs17730011	G	A		|| id:ebi-a-GCST90017028	TRUE	reported	igd
genus	7	81410263	0.0572001	0.0127043	7.63062e-06	14306	ebi-a-GCST90017028	rs4576377	C	A		|| id:ebi-a-GCST90017028	TRUE	reported	igd
genus	9	85576178	-0.0684038	0.0156562	9.17318e-06	14306	ebi-a-GCST90017028	rs2153460	A	T		|| id:ebi-a-GCST90017028	TRUE	reported	igd
genus	9	92267239	0.0657686	0.0139569	2.70321e-06	14306	ebi-a-GCST90017028	rs12346653	C	T		|| id:ebi-a-GCST90017028	TRUE	reported	igd
genus	10	83848397	0.126592	0.024345	4.68954e-07	14306	ebi-a-GCST90017028	rs11192447	A	G		|| id:ebi-a-GCST90017028	TRUE	reported	igd
genus	14	29872341	0.0867262	0.0183477	3.19007e-06	14306	ebi-a-GCST90017028	rs74315802	G	T		|| id:ebi-a-GCST90017028	TRUE	reported	igd
genus	19	42586245	-0.10453	0.0230253	4.23975e-06	14306	ebi-a-GCST90017028	rs10414815	C	T		|| id:ebi-a-GCST90017028	TRUE	reported	igd
genus	21	33193567	0.0562148	0.0127763	9.91996e-06	14306	ebi-a-GCST90017028	rs2833528	T	C		|| id:ebi-a-GCST90017028	TRUE	reported	igd
genus	21	44079875	0.0655062	0.0131994	9.96369e-07	14306	ebi-a-GCST90017028	rs9981767	A	C		|| id:ebi-a-GCST90017028	TRUE	reported	igd
genus	2	57701660	-0.051823	0.0110697	2.9282e-06	14306	ebi-a-GCST90017029	rs56791201	C	T		|| id:ebi-a-GCST90017029	TRUE	reported	igd
genus	1	179629191	0.108044	0.023638	5.32023e-06	14306	ebi-a-GCST90017035	rs7540303	C	T		|| id:ebi-a-GCST90017035	TRUE	reported	igd
genus	1	231960352	0.111131	0.0237218	3.43202e-06	14306	ebi-a-GCST90017035	rs2759329	A	G		|| id:ebi-a-GCST90017035	TRUE	reported	igd
genus	1	247642270	-0.223604	0.0482391	3.87044e-06	14306	ebi-a-GCST90017035	rs35225860	A	G		|| id:ebi-a-GCST90017035	TRUE	reported	igd
genus	2	150077190	-0.108148	0.0236848	4.85501e-06	14306	ebi-a-GCST90017035	rs1035588	A	G		|| id:ebi-a-GCST90017035	TRUE	reported	igd
genus	4	174810498	-0.104783	0.0231343	6.43724e-06	14306	ebi-a-GCST90017035	rs61090148	A	G		|| id:ebi-a-GCST90017035	TRUE	reported	igd
genus	6	10422207	0.119966	0.0268645	7.2835e-06	14306	ebi-a-GCST90017035	rs9460691	C	A		|| id:ebi-a-GCST90017035	TRUE	reported	igd
genus	9	21884425	-0.249079	0.0520814	2.95291e-06	14306	ebi-a-GCST90017035	rs72691585	C	A		|| id:ebi-a-GCST90017035	TRUE	reported	igd
genus	10	10777085	0.140434	0.0295602	2.19842e-06	14306	ebi-a-GCST90017035	rs17148768	G	A		|| id:ebi-a-GCST90017035	TRUE	reported	igd
genus	17	59632873	0.106529	0.0240379	9.70085e-06	14306	ebi-a-GCST90017035	rs8066522	A	G		|| id:ebi-a-GCST90017035	TRUE	reported	igd
genus	19	4925018	-0.19943	0.0407033	1.1882e-06	14306	ebi-a-GCST90017035	rs62112538	C	T		|| id:ebi-a-GCST90017035	TRUE	reported	igd
genus	20	19969568	0.122938	0.0269928	4.48456e-06	14306	ebi-a-GCST90017035	rs6046522	C	T		|| id:ebi-a-GCST90017035	TRUE	reported	igd
genus	1	184942671	0.0749553	0.0152632	9.16326e-07	14306	ebi-a-GCST90017036	rs234108	A	G		|| id:ebi-a-GCST90017036	TRUE	reported	igd
genus	2	179457147	0.0988765	0.0208795	3.07822e-06	14306	ebi-a-GCST90017036	rs16866406	A	G		|| id:ebi-a-GCST90017036	TRUE	reported	igd
genus	4	3656291	0.121589	0.0259612	4.09383e-06	14306	ebi-a-GCST90017036	rs12649930	T	G		|| id:ebi-a-GCST90017036	TRUE	reported	igd
genus	6	28580593	0.0744662	0.0151081	9.92247e-07	14306	ebi-a-GCST90017036	rs9393920	G	A		|| id:ebi-a-GCST90017036	TRUE	reported	igd
genus	6	36931994	0.0855032	0.018693	6.20955e-06	14306	ebi-a-GCST90017036	rs6901560	C	G		|| id:ebi-a-GCST90017036	TRUE	reported	igd
genus	8	11116314	-0.0824934	0.0180457	4.94299e-06	14306	ebi-a-GCST90017036	rs11990279	T	C		|| id:ebi-a-GCST90017036	TRUE	reported	igd
genus	8	21598077	0.0711323	0.0152261	3.20826e-06	14306	ebi-a-GCST90017036	rs4506202	G	A		|| id:ebi-a-GCST90017036	TRUE	reported	igd
genus	9	1798324	-0.129568	0.028157	4.38036e-06	14306	ebi-a-GCST90017036	rs16934185	A	G		|| id:ebi-a-GCST90017036	TRUE	reported	igd
genus	10	116469806	0.12212	0.0268629	5.34737e-06	14306	ebi-a-GCST90017036	rs75453768	G	T		|| id:ebi-a-GCST90017036	TRUE	reported	igd
genus	11	79013843	-0.101351	0.0221016	3.38712e-06	14306	ebi-a-GCST90017036	rs61883564	A	G		|| id:ebi-a-GCST90017036	TRUE	reported	igd
genus	11	25973451	0.0785431	0.0174075	6.02629e-06	14306	ebi-a-GCST90017036	rs12417956	C	G		|| id:ebi-a-GCST90017036	TRUE	reported	igd
genus	12	82366390	-0.174992	0.0388394	4.61987e-06	14306	ebi-a-GCST90017036	rs137917150	T	A		|| id:ebi-a-GCST90017036	TRUE	reported	igd
genus	14	21479605	0.143961	0.0290223	1.00921e-06	14306	ebi-a-GCST90017036	rs11627628	T	C		|| id:ebi-a-GCST90017036	TRUE	reported	igd
genus	14	32270129	-0.0752368	0.0156861	1.39627e-06	14306	ebi-a-GCST90017036	rs36095275	C	T		|| id:ebi-a-GCST90017036	TRUE	reported	igd
genus	20	18003390	0.0681423	0.0151349	6.59888e-06	14306	ebi-a-GCST90017036	rs62206502	A	C		|| id:ebi-a-GCST90017036	TRUE	reported	igd
genus	20	49507892	0.17664	0.0388812	2.0384e-06	14306	ebi-a-GCST90017036	rs761240	G	T		|| id:ebi-a-GCST90017036	TRUE	reported	igd
genus	22	44834707	-0.0795527	0.0162411	1.1472e-06	14306	ebi-a-GCST90017036	rs133832	A	C		|| id:ebi-a-GCST90017036	TRUE	reported	igd
genus	1	195971173	0.10572	0.0227246	4.35993e-06	14306	ebi-a-GCST90017040	rs3008582	T	C		|| id:ebi-a-GCST90017040	TRUE	reported	igd
genus	3	149298792	-0.162376	0.0354178	2.1112e-06	14306	ebi-a-GCST90017040	rs140997932	T	C		|| id:ebi-a-GCST90017040	TRUE	reported	igd
genus	5	174606261	-0.122561	0.0236507	2.63797e-07	14306	ebi-a-GCST90017040	rs2081023	A	G		|| id:ebi-a-GCST90017040	TRUE	reported	igd
genus	6	83459314	0.248065	0.0524304	1.92659e-06	14306	ebi-a-GCST90017040	rs17785622	A	G		|| id:ebi-a-GCST90017040	TRUE	reported	igd
genus	7	81759508	0.0779721	0.0171691	5.20176e-06	14306	ebi-a-GCST90017040	rs3801748	G	A		|| id:ebi-a-GCST90017040	TRUE	reported	igd
genus	11	114526679	-0.12465	0.0262323	4.03005e-06	14306	ebi-a-GCST90017040	rs145020347	A	G		|| id:ebi-a-GCST90017040	TRUE	reported	igd
genus	11	41079703	-0.138905	0.0289897	3.81751e-06	14306	ebi-a-GCST90017040	rs4756632	G	T		|| id:ebi-a-GCST90017040	TRUE	reported	igd
genus	12	71978728	-0.0988335	0.0216172	6.75274e-06	14306	ebi-a-GCST90017040	rs17109926	A	G		|| id:ebi-a-GCST90017040	TRUE	reported	igd
genus	12	25249743	0.0758215	0.0172568	6.59721e-06	14306	ebi-a-GCST90017040	rs10842464	C	T		|| id:ebi-a-GCST90017040	TRUE	reported	igd
genus	12	114131978	0.0882466	0.018382	2.14358e-06	14306	ebi-a-GCST90017040	rs4767113	C	T		|| id:ebi-a-GCST90017040	TRUE	reported	igd
genus	13	86162420	-0.106692	0.0220264	6.9274e-07	14306	ebi-a-GCST90017040	rs9602779	A	C		|| id:ebi-a-GCST90017040	TRUE	reported	igd
genus	17	69135631	-0.0852967	0.0175212	1.14067e-06	14306	ebi-a-GCST90017040	rs9900242	A	G		|| id:ebi-a-GCST90017040	TRUE	reported	igd
genus	18	69623804	-0.10229	0.0226948	5.95895e-06	14306	ebi-a-GCST90017040	rs7240324	T	G		|| id:ebi-a-GCST90017040	TRUE	reported	igd
genus	2	178954708	-0.146315	0.0297119	1.57438e-06	14306	ebi-a-GCST90017041	rs78383039	T	C		|| id:ebi-a-GCST90017041	TRUE	reported	igd
genus	2	72235444	-0.066273	0.0132736	6.31699e-07	14306	ebi-a-GCST90017041	rs7572229	A	G		|| id:ebi-a-GCST90017041	TRUE	reported	igd
genus	3	30163689	-0.0662952	0.0146114	6.22917e-06	14306	ebi-a-GCST90017041	rs11715853	G	A		|| id:ebi-a-GCST90017041	TRUE	reported	igd
genus	3	193896709	-0.0684957	0.0150892	8.13355e-06	14306	ebi-a-GCST90017041	rs6809952	G	A		|| id:ebi-a-GCST90017041	TRUE	reported	igd
genus	3	156550415	0.229468	0.0502262	5.88383e-06	14306	ebi-a-GCST90017041	rs62273907	A	G		|| id:ebi-a-GCST90017041	TRUE	reported	igd
genus	4	65556925	0.0636852	0.0132645	1.78328e-06	14306	ebi-a-GCST90017041	rs6828768	C	T		|| id:ebi-a-GCST90017041	TRUE	reported	igd
genus	4	15565736	-0.0684946	0.0142143	1.51206e-06	14306	ebi-a-GCST90017041	rs35414597	T	A		|| id:ebi-a-GCST90017041	TRUE	reported	igd
genus	6	137615592	-0.0840967	0.0177315	2.89714e-06	14306	ebi-a-GCST90017041	rs2090816	C	A		|| id:ebi-a-GCST90017041	TRUE	reported	igd
genus	8	114804024	0.109554	0.0235433	3.3485e-06	14306	ebi-a-GCST90017041	rs35055552	T	C		|| id:ebi-a-GCST90017041	TRUE	reported	igd
genus	8	16674526	-0.0713448	0.0156958	4.95291e-06	14306	ebi-a-GCST90017041	rs823424	G	A		|| id:ebi-a-GCST90017041	TRUE	reported	igd
[truncated: 561 more rows]

## Sheet: Table S3
Table S3: TSMR results of GM with NMOSD
id.exposure	outcome	exposure	method	nsnp	b	se	pval	or	or_lci95	or_uci95
ebi-a-GCST90017110	NMOSD	phylum Actinobacteriaphylum Actinobacteria|| id:ebi-a-GCST90017110	Inverse variance weighted	15	-0.377166	0.546219	0.489878	0.685802	0.235097	2.00055
ebi-a-GCST90017110	NMOSD	phylum Actinobacteriaphylum Actinobacteria|| id:ebi-a-GCST90017110	MR Egger	15	-2.58689	2.20659	0.262094	0.0752536	0.000995951	5.68612
ebi-a-GCST90017110	NMOSD	phylum Actinobacteriaphylum Actinobacteria|| id:ebi-a-GCST90017110	Weighted median	15	-0.179264	0.703638	0.798903	0.835885	0.210474	3.31968
ebi-a-GCST90017110	NMOSD	phylum Actinobacteriaphylum Actinobacteria|| id:ebi-a-GCST90017110	Weighted mode	15	-1.54568	1.29357	0.251978	0.213166	0.0168891	2.69048
ebi-a-GCST90017111	NMOSD	phylum Bacteroidetesphylum Bacteroidetes|| id:ebi-a-GCST90017111	Inverse variance weighted	12	0.553931	0.745306	0.457345	1.74008	0.403786	7.4987
ebi-a-GCST90017111	NMOSD	phylum Bacteroidetesphylum Bacteroidetes|| id:ebi-a-GCST90017111	MR Egger	12	0.977411	1.6804	0.573678	2.65757	0.0986499	71.5931
ebi-a-GCST90017111	NMOSD	phylum Bacteroidetesphylum Bacteroidetes|| id:ebi-a-GCST90017111	Weighted median	12	0.74299	0.879743	0.39836	2.10221	0.374821	11.7904
ebi-a-GCST90017111	NMOSD	phylum Bacteroidetesphylum Bacteroidetes|| id:ebi-a-GCST90017111	Weighted mode	12	0.671411	1.29611	0.614704	1.957	0.154282	24.8236
ebi-a-GCST90017112	NMOSD	phylum Cyanobacteriaphylum Cyanobacteria|| id:ebi-a-GCST90017112	Inverse variance weighted	8	-0.687337	0.473583	0.146682	0.502914	0.198779	1.27238
ebi-a-GCST90017112	NMOSD	phylum Cyanobacteriaphylum Cyanobacteria|| id:ebi-a-GCST90017112	MR Egger	8	0.0515472	1.67857	0.976498	1.0529	0.0392244	28.2629
ebi-a-GCST90017112	NMOSD	phylum Cyanobacteriaphylum Cyanobacteria|| id:ebi-a-GCST90017112	Weighted median	8	-0.546666	0.584309	0.349491	0.578876	0.184167	1.81953
ebi-a-GCST90017112	NMOSD	phylum Cyanobacteriaphylum Cyanobacteria|| id:ebi-a-GCST90017112	Weighted mode	8	-0.525241	0.850189	0.556268	0.591413	0.111737	3.1303
ebi-a-GCST90017113	NMOSD	phylum Euryarchaeotaphylum Euryarchaeota|| id:ebi-a-GCST90017113	Inverse variance weighted	12	0.119146	0.332012	0.719698	1.12653	0.587666	2.15953
ebi-a-GCST90017113	NMOSD	phylum Euryarchaeotaphylum Euryarchaeota|| id:ebi-a-GCST90017113	MR Egger	12	2.06122	1.38224	0.166757	7.85558	0.523114	117.967
ebi-a-GCST90017113	NMOSD	phylum Euryarchaeotaphylum Euryarchaeota|| id:ebi-a-GCST90017113	Weighted median	12	0.476373	0.402908	0.237072	1.61022	0.731011	3.54689
ebi-a-GCST90017113	NMOSD	phylum Euryarchaeotaphylum Euryarchaeota|| id:ebi-a-GCST90017113	Weighted mode	12	0.976936	0.895039	0.298383	2.6563	0.459627	15.3515
ebi-a-GCST90017114	NMOSD	phylum Firmicutesphylum Firmicutes|| id:ebi-a-GCST90017114	Inverse variance weighted	16	-0.564535	0.499747	0.258627	0.568625	0.213517	1.51432
ebi-a-GCST90017114	NMOSD	phylum Firmicutesphylum Firmicutes|| id:ebi-a-GCST90017114	MR Egger	16	-0.498661	1.10128	0.65763	0.607343	0.0701466	5.25851
ebi-a-GCST90017114	NMOSD	phylum Firmicutesphylum Firmicutes|| id:ebi-a-GCST90017114	Weighted median	16	-0.258454	0.684942	0.705923	0.772245	0.201707	2.95658
ebi-a-GCST90017114	NMOSD	phylum Firmicutesphylum Firmicutes|| id:ebi-a-GCST90017114	Weighted mode	16	0.240013	1.19224	0.843158	1.27127	0.122852	13.155
ebi-a-GCST90017115	NMOSD	phylum Lentisphaeraephylum Lentisphaerae|| id:ebi-a-GCST90017115	Inverse variance weighted	9	-0.404844	0.429215	0.345568	0.667081	0.287622	1.54715
ebi-a-GCST90017115	NMOSD	phylum Lentisphaeraephylum Lentisphaerae|| id:ebi-a-GCST90017115	MR Egger	9	0.241086	1.73616	0.89347	1.27263	0.04235	38.2429
ebi-a-GCST90017115	NMOSD	phylum Lentisphaeraephylum Lentisphaerae|| id:ebi-a-GCST90017115	Weighted median	9	-0.608944	0.537761	0.257479	0.543925	0.189578	1.56059
ebi-a-GCST90017115	NMOSD	phylum Lentisphaeraephylum Lentisphaerae|| id:ebi-a-GCST90017115	Weighted mode	9	-0.730311	0.687835	0.319346	0.481759	0.125122	1.85493
ebi-a-GCST90017116	NMOSD	phylum Proteobacteriaphylum Proteobacteria|| id:ebi-a-GCST90017116	Inverse variance weighted	11	0.790155	0.672417	0.239956	2.20374	0.589911	8.23252
ebi-a-GCST90017116	NMOSD	phylum Proteobacteriaphylum Proteobacteria|| id:ebi-a-GCST90017116	MR Egger	11	-0.0860533	2.12829	0.968631	0.917545	0.0141576	59.4654
ebi-a-GCST90017116	NMOSD	phylum Proteobacteriaphylum Proteobacteria|| id:ebi-a-GCST90017116	Weighted median	11	0.801251	0.878795	0.361894	2.22833	0.398046	12.4745
ebi-a-GCST90017116	NMOSD	phylum Proteobacteriaphylum Proteobacteria|| id:ebi-a-GCST90017116	Weighted mode	11	0.966253	1.44712	0.519433	2.62808	0.154107	44.8183
ebi-a-GCST90017117	NMOSD	phylum Tenericutesphylum Tenericutes|| id:ebi-a-GCST90017117	Inverse variance weighted	12	1.00611	0.478969	0.0356782	2.73494	1.06965	6.99286
ebi-a-GCST90017117	NMOSD	phylum Tenericutesphylum Tenericutes|| id:ebi-a-GCST90017117	MR Egger	12	3.36753	1.4899	0.0473498	29.0067	1.56411	537.935
ebi-a-GCST90017117	NMOSD	phylum Tenericutesphylum Tenericutes|| id:ebi-a-GCST90017117	Weighted median	12	0.575865	0.684999	0.400527	1.77867	0.464528	6.81048
ebi-a-GCST90017117	NMOSD	phylum Tenericutesphylum Tenericutes|| id:ebi-a-GCST90017117	Weighted mode	12	0.0484002	1.11894	0.966273	1.04959	0.117101	9.40764
ebi-a-GCST90017118	NMOSD	phylum Verrucomicrobiaphylum Verrucomicrobia|| id:ebi-a-GCST90017118	Inverse variance weighted	11	0.44275	0.645946	0.493074	1.55698	0.438978	5.52235
ebi-a-GCST90017118	NMOSD	phylum Verrucomicrobiaphylum Verrucomicrobia|| id:ebi-a-GCST90017118	MR Egger	11	2.66345	1.82986	0.179493	14.3457	0.397299	517.997
ebi-a-GCST90017118	NMOSD	phylum Verrucomicrobiaphylum Verrucomicrobia|| id:ebi-a-GCST90017118	Weighted median	11	0.0254268	0.797425	0.974563	1.02575	0.214912	4.89581
ebi-a-GCST90017118	NMOSD	phylum Verrucomicrobiaphylum Verrucomicrobia|| id:ebi-a-GCST90017118	Weighted mode	11	-0.677908	1.58721	0.678352	0.507678	0.0226217	11.3933
ebi-a-GCST90016908	NMOSD	class Actinobacteria|| id:ebi-a-GCST90016908	Inverse variance weighted	15	0.0218213	0.507559	0.965707	1.02206	0.37795	2.76388
ebi-a-GCST90016908	NMOSD	class Actinobacteria|| id:ebi-a-GCST90016908	MR Egger	15	0.0203204	1.50388	0.989424	1.02053	0.0535427	19.4513
ebi-a-GCST90016908	NMOSD	class Actinobacteria|| id:ebi-a-GCST90016908	Weighted median	15	-0.543212	0.68725	0.429286	0.58088	0.151038	2.23401
ebi-a-GCST90016908	NMOSD	class Actinobacteria|| id:ebi-a-GCST90016908	Weighted mode	15	-0.341887	0.947211	0.723532	0.710428	0.110978	4.54781
ebi-a-GCST90016909	NMOSD	class Alphaproteobacteria|| id:ebi-a-GCST90016909	Inverse variance weighted	7	-0.461811	0.597584	0.439643	0.630141	0.195328	2.03288
ebi-a-GCST90016909	NMOSD	class Alphaproteobacteria|| id:ebi-a-GCST90016909	MR Egger	7	-0.555733	2.4324	0.82833	0.573651	0.00487691	67.4763
ebi-a-GCST90016909	NMOSD	class Alphaproteobacteria|| id:ebi-a-GCST90016909	Weighted median	7	-0.0205148	0.771501	0.978786	0.979694	0.215961	4.44432
ebi-a-GCST90016909	NMOSD	class Alphaproteobacteria|| id:ebi-a-GCST90016909	Weighted mode	7	-0.00924386	1.05586	0.993299	0.990799	0.125089	7.84788
ebi-a-GCST90016910	NMOSD	class Bacilli|| id:ebi-a-GCST90016910	Inverse variance weighted	18	-0.251673	0.494827	0.611027	0.777499	0.294777	2.05071
ebi-a-GCST90016910	NMOSD	class Bacilli|| id:ebi-a-GCST90016910	MR Egger	18	-1.31717	1.40945	0.363922	0.267893	0.0169128	4.24333
ebi-a-GCST90016910	NMOSD	class Bacilli|| id:ebi-a-GCST90016910	Weighted median	18	-0.869338	0.710008	0.220799	0.419229	0.104251	1.68586
ebi-a-GCST90016910	NMOSD	class Bacilli|| id:ebi-a-GCST90016910	Weighted mode	18	-1.33517	1.17498	0.271584	0.263115	0.0263016	2.63214
ebi-a-GCST90016911	NMOSD	class Bacteroidia|| id:ebi-a-GCST90016911	Inverse variance weighted	14	0.798996	0.690806	0.24743	2.22331	0.574081	8.61044
ebi-a-GCST90016911	NMOSD	class Bacteroidia|| id:ebi-a-GCST90016911	MR Egger	14	1.51655	1.50298	0.332876	4.55646	0.239477	86.6945
ebi-a-GCST90016911	NMOSD	class Bacteroidia|| id:ebi-a-GCST90016911	Weighted median	14	0.792832	0.811714	0.328699	2.20965	0.450171	10.846
ebi-a-GCST90016911	NMOSD	class Bacteroidia|| id:ebi-a-GCST90016911	Weighted mode	14	0.136063	1.39497	0.923786	1.14575	0.074417	17.6405
ebi-a-GCST90016912	NMOSD	class Betaproteobacteria|| id:ebi-a-GCST90016912	Inverse variance weighted	12	-0.582698	0.636628	0.36004	0.55839	0.160335	1.94467
ebi-a-GCST90016912	NMOSD	class Betaproteobacteria|| id:ebi-a-GCST90016912	MR Egger	12	-2.08494	2.28447	0.382899	0.124314	0.00141233	10.9422
ebi-a-GCST90016912	NMOSD	class Betaproteobacteria|| id:ebi-a-GCST90016912	Weighted median	12	-0.226183	0.876229	0.796305	0.797572	0.143189	4.44254
ebi-a-GCST90016912	NMOSD	class Betaproteobacteria|| id:ebi-a-GCST90016912	Weighted mode	12	-0.0892997	1.58068	0.955961	0.914571	0.0412773	20.2639
ebi-a-GCST90016913	NMOSD	class Clostridia|| id:ebi-a-GCST90016913	Inverse variance weighted	13	-0.802257	0.634724	0.206249	0.448316	0.12921	1.55551
ebi-a-GCST90016913	NMOSD	class Clostridia|| id:ebi-a-GCST90016913	MR Egger	13	-2.4235	1.43336	0.118983	0.0886112	0.0053381	1.47093
ebi-a-GCST90016913	NMOSD	class Clostridia|| id:ebi-a-GCST90016913	Weighted median	13	-0.365173	0.854515	0.669127	0.694076	0.130026	3.70497
ebi-a-GCST90016913	NMOSD	class Clostridia|| id:ebi-a-GCST90016913	Weighted mode	13	-0.312296	0.99123	0.758128	0.731765	0.104862	5.1065
ebi-a-GCST90016914	NMOSD	class Coriobacteriia|| id:ebi-a-GCST90016914	Inverse variance weighted	14	-0.231895	0.782878	0.767071	0.79303	0.170958	3.67865
ebi-a-GCST90016914	NMOSD	class Coriobacteriia|| id:ebi-a-GCST90016914	MR Egger	14	-0.650056	3.39721	0.851451	0.522017	0.000669763	406.862
ebi-a-GCST90016914	NMOSD	class Coriobacteriia|| id:ebi-a-GCST90016914	Weighted median	14	0.561725	0.944273	0.551927	1.75369	0.275532	11.1618
ebi-a-GCST90016914	NMOSD	class Coriobacteriia|| id:ebi-a-GCST90016914	Weighted mode	14	1.5504	1.72791	0.385892	4.71336	0.159405	139.366
ebi-a-GCST90016915	NMOSD	class Deltaproteobacteria|| id:ebi-a-GCST90016915	Inverse variance weighted	13	-0.482056	0.61074	0.429938	0.617512	0.18654	2.04418
ebi-a-GCST90016915	NMOSD	class Deltaproteobacteria|| id:ebi-a-GCST90016915	MR Egger	13	-0.21665	1.84639	0.908708	0.805212	0.0215889	30.0324
ebi-a-GCST90016915	NMOSD	class Deltaproteobacteria|| id:ebi-a-GCST90016915	Weighted median	13	-1.09899	0.74215	0.138654	0.333207	0.0778007	1.42707
ebi-a-GCST90016915	NMOSD	class Deltaproteobacteria|| id:ebi-a-GCST90016915	Weighted mode	13	-1.21892	1.04912	0.267886	0.295551	0.0378097	2.31025
ebi-a-GCST90016916	NMOSD	class Erysipelotrichia|| id:ebi-a-GCST90016916	Inverse variance weighted	13	-1.27231	0.673108	0.0587306	0.280183	0.0748999	1.0481
ebi-a-GCST90016916	NMOSD	class Erysipelotrichia|| id:ebi-a-GCST90016916	MR Egger	13	-4.60764	2.82515	0.131176	0.00997532	3.92744e-05	2.53364
ebi-a-GCST90016916	NMOSD	class Erysipelotrichia|| id:ebi-a-GCST90016916	Weighted median	13	-1.75765	0.849345	0.0385064	0.172449	0.032635	0.91125
ebi-a-GCST90016916	NMOSD	class Erysipelotrichia|| id:ebi-a-GCST90016916	Weighted mode	13	-2.14927	1.28094	0.119201	0.116569	0.00946718	1.43531
ebi-a-GCST90016917	NMOSD	class Gammaproteobacteria|| id:ebi-a-GCST90016917	Inverse variance weighted	6	0.188889	0.776983	0.807923	1.20791	0.263422	5.53879
ebi-a-GCST90016917	NMOSD	class Gammaproteobacteria|| id:ebi-a-GCST90016917	MR Egger	6	-2.34579	2.40348	0.384329	0.0957715	0.000861699	10.6443
ebi-a-GCST90016917	NMOSD	class Gammaproteobacteria|| id:ebi-a-GCST90016917	Weighted median	6	0.923227	1.09468	0.399016	2.5174	0.294541	21.5159
ebi-a-GCST90016917	NMOSD	class Gammaproteobacteria|| id:ebi-a-GCST90016917	Weighted mode	6	1.50761	1.48421	0.356345	4.51592	0.246242	82.8192
ebi-a-GCST90016918	NMOSD	class Lentisphaeria|| id:ebi-a-GCST90016918	Inverse variance weighted	8	-0.346869	0.482965	0.472629	0.706898	0.274314	1.82165
ebi-a-GCST90016918	NMOSD	class Lentisphaeria|| id:ebi-a-GCST90016918	MR Egger	8	0.326258	1.84465	0.865432	1.38577	0.0372815	51.5099
ebi-a-GCST90016918	NMOSD	class Lentisphaeria|| id:ebi-a-GCST90016918	Weighted median	8	-0.539285	0.547894	0.324974	0.583165	0.199257	1.70674
ebi-a-GCST90016918	NMOSD	class Lentisphaeria|| id:ebi-a-GCST90016918	Weighted mode	8	-0.679964	0.841737	0.445778	0.506635	0.0973181	2.63753
ebi-a-GCST90016919	NMOSD	class Melainabacteria|| id:ebi-a-GCST90016919	Inverse variance weighted	10	0.161772	0.512839	0.752425	1.17559	0.430248	3.21214
ebi-a-GCST90016919	NMOSD	class Melainabacteria|| id:ebi-a-GCST90016919	MR Egger	10	1.66924	1.48067	0.292267	5.30814	0.291455	96.6749
ebi-a-GCST90016919	NMOSD	class Melainabacteria|| id:ebi-a-GCST90016919	Weighted median	10	0.175895	0.545038	0.746906	1.19231	0.40968	3.47006
ebi-a-GCST90016919	NMOSD	class Melainabacteria|| id:ebi-a-GCST90016919	Weighted mode	10	0.345321	0.886986	0.706091	1.41244	0.248287	8.03505
ebi-a-GCST90016920	NMOSD	class Methanobacteria|| id:ebi-a-GCST90016920	Inverse variance weighted	10	0.303899	0.335516	0.365059	1.35513	0.702077	2.61565
ebi-a-GCST90016920	NMOSD	class Methanobacteria|| id:ebi-a-GCST90016920	MR Egger	10	-0.60797	1.47515	0.691058	0.544455	0.0302196	9.80924
ebi-a-GCST90016920	NMOSD	class Methanobacteria|| id:ebi-a-GCST90016920	Weighted median	10	0.530051	0.429426	0.217082	1.69902	0.732257	3.94215
ebi-a-GCST90016920	NMOSD	class Methanobacteria|| id:ebi-a-GCST90016920	Weighted mode	10	1.05583	0.774714	0.206047	2.87436	0.629638	13.1217
ebi-a-GCST90016921	NMOSD	class Mollicutes|| id:ebi-a-GCST90016921	Inverse variance weighted	12	1.00611	0.478969	0.0356782	2.73494	1.06965	6.99286
ebi-a-GCST90016921	NMOSD	class Mollicutes|| id:ebi-a-GCST90016921	MR Egger	12	3.36753	1.4899	0.0473498	29.0067	1.56411	537.935
ebi-a-GCST90016921	NMOSD	class Mollicutes|| id:ebi-a-GCST90016921	Weighted median	12	0.575865	0.675223	0.393742	1.77867	0.473515	6.68123
ebi-a-GCST90016921	NMOSD	class Mollicutes|| id:ebi-a-GCST90016921	Weighted mode	12	0.0484002	1.24685	0.969731	1.04959	0.0911334	12.0882
ebi-a-GCST90016922	NMOSD	class Negativicutes|| id:ebi-a-GCST90016922	Inverse variance weighted	12	-0.836293	0.750399	0.26508	0.433314	0.099552	1.88606
ebi-a-GCST90016922	NMOSD	class Negativicutes|| id:ebi-a-GCST90016922	MR Egger	12	0.943609	2.39146	0.701441	2.56924	0.0236676	278.904
ebi-a-GCST90016922	NMOSD	class Negativicutes|| id:ebi-a-GCST90016922	Weighted median	12	-0.437746	0.867214	0.613718	0.64549	0.117951	3.53245
ebi-a-GCST90016922	NMOSD	class Negativicutes|| id:ebi-a-GCST90016922	Weighted mode	12	-0.367991	1.3673	0.792806	0.692123	0.0474583	10.0938
ebi-a-GCST90016923	NMOSD	class Verrucomicrobiae|| id:ebi-a-GCST90016923	Inverse variance weighted	11	0.638077	0.542889	0.239861	1.89284	0.653125	5.48567
ebi-a-GCST90016923	NMOSD	class Verrucomicrobiae|| id:ebi-a-GCST90016923	MR Egger	11	2.1986	1.88061	0.272399	9.01237	0.22596	359.457
ebi-a-GCST90016923	NMOSD	class Verrucomicrobiae|| id:ebi-a-GCST90016923	Weighted median	11	-0.0354968	0.745788	0.962038	0.965126	0.223746	4.16305
ebi-a-GCST90016923	NMOSD	class Verrucomicrobiae|| id:ebi-a-GCST90016923	Weighted mode	11	-0.510762	1.35613	0.714315	0.600038	0.0420553	8.56125
ebi-a-GCST90017090	NMOSD	order Actinomycetales|| id:ebi-a-GCST90017090	Inverse variance weighted	5	-0.911926	0.684116	0.182532	0.40175	0.105105	1.53563
ebi-a-GCST90017090	NMOSD	order Actinomycetales|| id:ebi-a-GCST90017090	MR Egger	5	0.934778	1.65654	0.611989	2.54665	0.0990598	65.4697
ebi-a-GCST90017090	NMOSD	order Actinomycetales|| id:ebi-a-GCST90017090	Weighted median	5	-0.678422	0.798989	0.395825	0.507417	0.105987	2.42929
ebi-a-GCST90017090	NMOSD	order Actinomycetales|| id:ebi-a-GCST90017090	Weighted mode	5	-0.70422	0.968237	0.507314	0.494494	0.0741279	3.29869
ebi-a-GCST90017091	NMOSD	order Bacillales|| id:ebi-a-GCST90017091	Inverse variance weighted	9	-0.400736	0.325756	0.218632	0.669827	0.353732	1.26839
ebi-a-GCST90017091	NMOSD	order Bacillales|| id:ebi-a-GCST90017091	MR Egger	9	-2.60843	1.52677	0.131304	0.0736499	0.0036945	1.46821
ebi-a-GCST90017091	NMOSD	order Bacillales|| id:ebi-a-GCST90017091	Weighted median	9	-0.590836	0.458268	0.197301	0.553864	0.225589	1.35984
ebi-a-GCST90017091	NMOSD	order Bacillales|| id:ebi-a-GCST90017091	Weighted mode	9	-0.81821	0.698089	0.274888	0.441221	0.112313	1.73333
ebi-a-GCST90017092	NMOSD	order Bacteroidales|| id:ebi-a-GCST90017092	Inverse variance weighted	14	0.798996	0.690806	0.24743	2.22331	0.574081	8.61044
ebi-a-GCST90017092	NMOSD	order Bacteroidales|| id:ebi-a-GCST90017092	MR Egger	14	1.51655	1.50298	0.332876	4.55646	0.239477	86.6945
ebi-a-GCST90017092	NMOSD	order Bacteroidales|| id:ebi-a-GCST90017092	Weighted median	14	0.792832	0.809536	0.327399	2.20965	0.452097	10.7998
ebi-a-GCST90017092	NMOSD	order Bacteroidales|| id:ebi-a-GCST90017092	Weighted mode	14	0.136063	1.46803	0.927568	1.14575	0.0644877	20.3566
ebi-a-GCST90017093	NMOSD	order Bifidobacteriales|| id:ebi-a-GCST90017093	Inverse variance weighted	12	0.451323	0.534581	0.398527	1.57039	0.55076	4.47766
ebi-a-GCST90017093	NMOSD	order Bifidobacteriales|| id:ebi-a-GCST90017093	MR Egger	12	-1.09242	1.80458	0.558427	0.335403	0.00976061	11.5255
ebi-a-GCST90017093	NMOSD	order Bifidobacteriales|| id:ebi-a-GCST90017093	Weighted median	12	0.21524	0.721464	0.765445	1.24016	0.301547	5.10035
ebi-a-GCST90017093	NMOSD	order Bifidobacteriales|| id:ebi-a-GCST90017093	Weighted mode	12	-0.684418	1.02569	0.51835	0.504384	0.0675576	3.76572
ebi-a-GCST90017094	NMOSD	order Burkholderiales|| id:ebi-a-GCST90017094	Inverse variance weighted	11	-0.655458	0.689148	0.341547	0.519204	0.1345	2.00426
ebi-a-GCST90017094	NMOSD	order Burkholderiales|| id:ebi-a-GCST90017094	MR Egger	11	-1.30596	2.39564	0.598905	0.270913	0.00247526	29.651
ebi-a-GCST90017094	NMOSD	order Burkholderiales|| id:ebi-a-GCST90017094	Weighted median	11	-0.781947	0.904434	0.387274	0.457514	0.0777204	2.69324
ebi-a-GCST90017094	NMOSD	order Burkholderiales|| id:ebi-a-GCST90017094	Weighted mode	11	-1.27784	1.65274	0.457311	0.278639	0.0109196	7.11016
ebi-a-GCST90017095	NMOSD	order Clostridiales|| id:ebi-a-GCST90017095	Inverse variance weighted	14	-0.548768	0.603938	0.363535	0.577661	0.176844	1.88693
ebi-a-GCST90017095	NMOSD	order Clostridiales|| id:ebi-a-GCST90017095	MR Egger	14	-2.37024	1.35639	0.106072	0.093458	0.00654693	1.33412
ebi-a-GCST90017095	NMOSD	order Clostridiales|| id:ebi-a-GCST90017095	Weighted median	14	0.0749583	0.800862	0.925429	1.07784	0.224309	5.17919
ebi-a-GCST90017095	NMOSD	order Clostridiales|| id:ebi-a-GCST90017095	Weighted mode	14	0.484806	1.02468	0.643966	1.62386	0.217934	12.0996
ebi-a-GCST90017096	NMOSD	order Coriobacteriales|| id:ebi-a-GCST90017096	Inverse variance weighted	14	-0.231895	0.782878	0.767071	0.79303	0.170958	3.67865
ebi-a-GCST90017096	NMOSD	order Coriobacteriales|| id:ebi-a-GCST90017096	MR Egger	14	-0.650056	3.39721	0.851451	0.522017	0.000669763	406.862
ebi-a-GCST90017096	NMOSD	order Coriobacteriales|| id:ebi-a-GCST90017096	Weighted median	14	0.561725	0.949067	0.553937	1.75369	0.272956	11.2672
ebi-a-GCST90017096	NMOSD	order Coriobacteriales|| id:ebi-a-GCST90017096	Weighted mode	14	1.5504	1.72028	0.383849	4.71336	0.161808	137.297
ebi-a-GCST90017097	NMOSD	order Desulfovibrionales|| id:ebi-a-GCST90017097	Inverse variance weighted	12	-0.267309	0.601051	0.656511	0.765436	0.235659	2.48619
ebi-a-GCST90017097	NMOSD	order Desulfovibrionales|| id:ebi-a-GCST90017097	MR Egger	12	-0.393081	1.73059	0.824894	0.674974	0.0227078	20.0631
ebi-a-GCST90017097	NMOSD	order Desulfovibrionales|| id:ebi-a-GCST90017097	Weighted median	12	-1.02931	0.758249	0.174626	0.357252	0.0808239	1.5791
ebi-a-GCST90017097	NMOSD	order Desulfovibrionales|| id:ebi-a-GCST90017097	Weighted mode	12	-1.22825	1.02589	0.256375	0.292806	0.0392033	2.18694
ebi-a-GCST90017098	NMOSD	order Enterobacteriales|| id:ebi-a-GCST90017098	Inverse variance weighted (multiplicative random effects)	6	0.48208	1.19394	0.68638	1.61944	0.155978	16.8138
ebi-a-GCST90017098	NMOSD	order Enterobacteriales|| id:ebi-a-GCST90017098	MR Egger	6	8.0268	6.97798	0.31411	3061.93	0.00351735	2.66548e+09
ebi-a-GCST90017098	NMOSD	order Enterobacteriales|| id:ebi-a-GCST90017098	Weighted median	6	-0.410396	1.07148	0.701708	0.663388	0.0812274	5.41792
ebi-a-GCST90017098	NMOSD	order Enterobacteriales|| id:ebi-a-GCST90017098	Weighted mode	6	-0.33219	1.61526	0.84517	0.717351	0.0302546	17.0087
ebi-a-GCST90017099	NMOSD	order Erysipelotrichales|| id:ebi-a-GCST90017099	Inverse variance weighted	13	-1.27231	0.673108	0.0587306	0.280183	0.0748999	1.0481
ebi-a-GCST90017099	NMOSD	order Erysipelotrichales|| id:ebi-a-GCST90017099	MR Egger	13	-4.60764	2.82515	0.131176	0.00997532	3.92744e-05	2.53364
ebi-a-GCST90017099	NMOSD	order Erysipelotrichales|| id:ebi-a-GCST90017099	Weighted median	13	-1.75765	0.838959	0.0361672	0.172449	0.0333061	0.892887
ebi-a-GCST90017099	NMOSD	order Erysipelotrichales|| id:ebi-a-GCST90017099	Weighted mode	13	-2.14927	1.26311	0.114577	0.116569	0.009804	1.386
ebi-a-GCST90017100	NMOSD	order Gastranaerophilales|| id:ebi-a-GCST90017100	Inverse variance weighted	9	0.27716	0.523702	0.596645	1.31938	0.472699	3.68259
ebi-a-GCST90017100	NMOSD	order Gastranaerophilales|| id:ebi-a-GCST90017100	MR Egger	9	1.60688	1.51335	0.323578	4.98723	0.256846	96.8383
ebi-a-GCST90017100	NMOSD	order Gastranaerophilales|| id:ebi-a-GCST90017100	Weighted median	9	0.13609	0.596349	0.819486	1.14579	0.356025	3.68744
ebi-a-GCST90017100	NMOSD	order Gastranaerophilales|| id:ebi-a-GCST90017100	Weighted mode	9	0.0240877	0.854709	0.978207	1.02438	0.191831	5.47022
ebi-a-GCST90017101	NMOSD	order Lactobacillales|| id:ebi-a-GCST90017101	Inverse variance weighted	15	-0.0262434	0.55042	0.961972	0.974098	0.331189	2.86503
ebi-a-GCST90017101	NMOSD	order Lactobacillales|| id:ebi-a-GCST90017101	MR Egger	15	-0.673703	1.52924	0.666778	0.509817	0.0254506	10.2125
ebi-a-GCST90017101	NMOSD	order Lactobacillales|| id:ebi-a-GCST90017101	Weighted median	15	-0.722594	0.788014	0.359152	0.485491	0.103612	2.27485
ebi-a-GCST90017101	NMOSD	order Lactobacillales|| id:ebi-a-GCST90017101	Weighted mode	15	-1.37052	1.30633	0.311891	0.253976	0.0196254	3.28674
ebi-a-GCST90017102	NMOSD	order Methanobacteriales|| id:ebi-a-GCST90017102	Inverse variance weighted	10	0.303899	0.335516	0.365059	1.35513	0.702077	2.61565
ebi-a-GCST90017102	NMOSD	order Methanobacteriales|| id:ebi-a-GCST90017102	MR Egger	10	-0.60797	1.47515	0.691058	0.544455	0.0302196	9.80924
ebi-a-GCST90017102	NMOSD	order Methanobacteriales|| id:ebi-a-GCST90017102	Weighted median	10	0.530051	0.445544	0.234176	1.69902	0.709485	4.06868
ebi-a-GCST90017102	NMOSD	order Methanobacteriales|| id:ebi-a-GCST90017102	Weighted mode	10	1.05583	0.756797	0.196444	2.87436	0.652143	12.6689
ebi-a-GCST90017103	NMOSD	order Mollicutes RF9|| id:ebi-a-GCST90017103	Inverse variance weighted	13	0.742887	0.453566	0.101446	2.102	0.86407	5.11346
ebi-a-GCST90017103	NMOSD	order Mollicutes RF9|| id:ebi-a-GCST90017103	MR Egger	13	2.15357	1.31828	0.130608	8.61554	0.650334	114.137
ebi-a-GCST90017103	NMOSD	order Mollicutes RF9|| id:ebi-a-GCST90017103	Weighted median	13	0.906336	0.593808	0.126932	2.47524	0.77296	7.92641
ebi-a-GCST90017103	NMOSD	order Mollicutes RF9|| id:ebi-a-GCST90017103	Weighted mode	13	1.36922	1.05041	0.216852	3.93229	0.50179	30.8155
ebi-a-GCST90017104	NMOSD	order NB1n|| id:ebi-a-GCST90017104	Inverse variance weighted	13	0.179575	0.376851	0.633707	1.19671	0.57175	2.50479
ebi-a-GCST90017104	NMOSD	order NB1n|| id:ebi-a-GCST90017104	MR Egger	13	2.24213	1.52937	0.170628	9.41338	0.469812	188.611
ebi-a-GCST90017104	NMOSD	order NB1n|| id:ebi-a-GCST90017104	Weighted median	13	0.163142	0.46306	0.724604	1.1772	0.474993	2.91754
ebi-a-GCST90017104	NMOSD	order NB1n|| id:ebi-a-GCST90017104	Weighted mode	13	0.0810865	0.880555	0.928149	1.08446	0.193051	6.09199
ebi-a-GCST90017105	NMOSD	order Pasteurellales|| id:ebi-a-GCST90017105	Inverse variance weighted	14	0.23699	0.377466	0.530106	1.26743	0.604809	2.656
ebi-a-GCST90017105	NMOSD	order Pasteurellales|| id:ebi-a-GCST90017105	MR Egger	14	0.665377	0.883257	0.46578	1.94522	0.34445	10.9853
ebi-a-GCST90017105	NMOSD	order Pasteurellales|| id:ebi-a-GCST90017105	Weighted median	14	-0.167139	0.537656	0.755903	0.846082	0.294951	2.42703
ebi-a-GCST90017105	NMOSD	order Pasteurellales|| id:ebi-a-GCST90017105	Weighted mode	14	-0.359873	0.787444	0.655204	0.697765	0.149081	3.26584
ebi-a-GCST90017106	NMOSD	order Rhodospirillales|| id:ebi-a-GCST90017106	Inverse variance weighted	14	0.713712	0.481435	0.138216	2.04156	0.794612	5.24526
ebi-a-GCST90017106	NMOSD	order Rhodospirillales|| id:ebi-a-GCST90017106	MR Egger	14	1.40483	2.29731	0.55227	4.07485	0.0451441	367.809
ebi-a-GCST90017106	NMOSD	order Rhodospirillales|| id:ebi-a-GCST90017106	Weighted median	14	0.930898	0.584769	0.111405	2.53679	0.806341	7.98085
ebi-a-GCST90017106	NMOSD	order Rhodospirillales|| id:ebi-a-GCST90017106	Weighted mode	14	0.43662	1.05447	0.685577	1.54747	0.195901	12.2238
ebi-a-GCST90017107	NMOSD	order Selenomonadales|| id:ebi-a-GCST90017107	Inverse variance weighted	12	-0.836293	0.750399	0.26508	0.433314	0.099552	1.88606
ebi-a-GCST90017107	NMOSD	order Selenomonadales|| id:ebi-a-GCST90017107	MR Egger	12	0.943609	2.39146	0.701441	2.56924	0.0236676	278.904
ebi-a-GCST90017107	NMOSD	order Selenomonadales|| id:ebi-a-GCST90017107	Weighted median	12	-0.437746	0.882143	0.619732	0.64549	0.11455	3.63735
ebi-a-GCST90017107	NMOSD	order Selenomonadales|| id:ebi-a-GCST90017107	Weighted mode	12	-0.367991	1.19455	0.763792	0.692123	0.0665833	7.19451
ebi-a-GCST90017108	NMOSD	order Verrucomicrobiales|| id:ebi-a-GCST90017108	Inverse variance weighted	11	0.638077	0.542889	0.239861	1.89284	0.653125	5.48567
ebi-a-GCST90017108	NMOSD	order Verrucomicrobiales|| id:ebi-a-GCST90017108	MR Egger	11	2.1986	1.88061	0.272399	9.01237	0.22596	359.457
ebi-a-GCST90017108	NMOSD	order Verrucomicrobiales|| id:ebi-a-GCST90017108	Weighted median	11	-0.0354968	0.747411	0.96212	0.965126	0.223036	4.17632
ebi-a-GCST90017108	NMOSD	order Verrucomicrobiales|| id:ebi-a-GCST90017108	Weighted mode	11	-0.510762	1.33334	0.709684	0.600038	0.0439764	8.18725
ebi-a-GCST90017109	NMOSD	order Victivallales|| id:ebi-a-GCST90017109	Inverse variance weighted	8	-0.346869	0.482965	0.472629	0.706898	0.274314	1.82165
ebi-a-GCST90017109	NMOSD	order Victivallales|| id:ebi-a-GCST90017109	MR Egger	8	0.326258	1.84465	0.865432	1.38577	0.0372815	51.5099
ebi-a-GCST90017109	NMOSD	order Victivallales|| id:ebi-a-GCST90017109	Weighted median	8	-0.539285	0.547319	0.324467	0.583165	0.199482	1.70482
ebi-a-GCST90017109	NMOSD	order Victivallales|| id:ebi-a-GCST90017109	Weighted mode	8	-0.679964	0.847101	0.448541	0.506635	0.0963005	2.6654
ebi-a-GCST90016924	NMOSD	family Acidaminococcaceae|| id:ebi-a-GCST90016924	Inverse variance weighted	7	-0.460491	0.680407	0.498541	0.630974	0.166279	2.39434
ebi-a-GCST90016924	NMOSD	family Acidaminococcaceae|| id:ebi-a-GCST90016924	MR Egger	7	-0.66998	2.27298	0.780025	0.511719	0.00594609	44.0384
ebi-a-GCST90016924	NMOSD	family Acidaminococcaceae|| id:ebi-a-GCST90016924	Weighted median	7	-0.941611	0.92741	0.309957	0.389999	0.0633339	2.40155
ebi-a-GCST90016924	NMOSD	family Acidaminococcaceae|| id:ebi-a-GCST90016924	Weighted mode	7	-1.09318	1.32915	0.442264	0.33515	0.0247653	4.53559
ebi-a-GCST90016925	NMOSD	family Actinomycetaceae|| id:ebi-a-GCST90016925	Inverse variance weighted	5	-0.909923	0.683486	0.183091	0.402555	0.105446	1.53681
ebi-a-GCST90016925	NMOSD	family Actinomycetaceae|| id:ebi-a-GCST90016925	MR Egger	5	0.939461	1.65362	0.609692	2.5586	0.100095	65.402
ebi-a-GCST90016925	NMOSD	family Actinomycetaceae|| id:ebi-a-GCST90016925	Weighted median	5	-0.676773	0.784467	0.388293	0.508255	0.109227	2.36501
ebi-a-GCST90016925	NMOSD	family Actinomycetaceae|| id:ebi-a-GCST90016925	Weighted mode	5	-0.708668	1.03757	0.532111	0.4923	0.0644215	3.76208
ebi-a-GCST90016926	NMOSD	family Alcaligenaceae|| id:ebi-a-GCST90016926	Inverse variance weighted	12	-0.456619	0.606497	0.451522	0.633421	0.192944	2.07947
ebi-a-GCST90016926	NMOSD	family Alcaligenaceae|| id:ebi-a-GCST90016926	MR Egger	12	0.89992	2.78249	0.753037	2.45941	0.0105275	574.562
ebi-a-GCST90016926	NMOSD	family Alcaligenaceae|| id:ebi-a-GCST90016926	Weighted median	12	-0.185691	0.888714	0.834492	0.83053	0.145501	4.74072
ebi-a-GCST90016926	NMOSD	family Alcaligenaceae|| id:ebi-a-GCST90016926	Weighted mode	12	1.15165	1.50842	0.461239	3.16341	0.164497	60.8348
ebi-a-GCST90016927	NMOSD	family Bacteroidaceae|| id:ebi-a-GCST90016927	Inverse variance weighted (multiplicative random effects)	9	0.0750043	1.14606	0.947819	1.07789	0.114032	10.1888
ebi-a-GCST90016927	NMOSD	family Bacteroidaceae|| id:ebi-a-GCST90016927	MR Egger	9	6.93604	5.77887	0.269084	1028.69	0.012394	8.53796e+07
ebi-a-GCST90016927	NMOSD	family Bacteroidaceae|| id:ebi-a-GCST90016927	Weighted median	9	1.06685	1.15676	0.356386	2.90621	0.301073	28.0532
ebi-a-GCST90016927	NMOSD	family Bacteroidaceae|| id:ebi-a-GCST90016927	Weighted mode	9	2.74213	2.27619	0.262744	15.52	0.179211	1344.06
ebi-a-GCST90016928	NMOSD	family Bacteroidales S24 7group|| id:ebi-a-GCST90016928	Inverse variance weighted	8	0.646816	0.513491	0.207797	1.90945	0.697938	5.22397
ebi-a-GCST90016928	NMOSD	family Bacteroidales S24 7group|| id:ebi-a-GCST90016928	MR Egger	8	2.96558	2.44858	0.271374	19.406	0.159833	2356.18
ebi-a-GCST90016928	NMOSD	family Bacteroidales S24 7group|| id:ebi-a-GCST90016928	Weighted median	8	0.341235	0.695283	0.623578	1.40668	0.360047	5.49582
ebi-a-GCST90016928	NMOSD	family Bacteroidales S24 7group|| id:ebi-a-GCST90016928	Weighted mode	8	0.248009	0.941971	0.799911	1.28147	0.202249	8.11953
ebi-a-GCST90016929	NMOSD	family Bifidobacteriaceae|| id:ebi-a-GCST90016929	Inverse variance weighted	12	0.451323	0.534581	0.398527	1.57039	0.55076	4.47766
ebi-a-GCST90016929	NMOSD	family Bifidobacteriaceae|| id:ebi-a-GCST90016929	MR Egger	12	-1.09242	1.80458	0.558427	0.335403	0.00976061	11.5255
ebi-a-GCST90016929	NMOSD	family Bifidobacteriaceae|| id:ebi-a-GCST90016929	Weighted median	12	0.21524	0.705177	0.760192	1.24016	0.311328	4.94011
ebi-a-GCST90016929	NMOSD	family Bifidobacteriaceae|| id:ebi-a-GCST90016929	Weighted mode	12	-0.684418	0.995571	0.506028	0.504384	0.0716662	3.54983
ebi-a-GCST90016931	NMOSD	family Clostridiaceae1|| id:ebi-a-GCST90016931	Inverse variance weighted	10	0.562561	0.603271	0.351069	1.75516	0.538025	5.72575
ebi-a-GCST90016931	NMOSD	family Clostridiaceae1|| id:ebi-a-GCST90016931	MR Egger	10	1.67845	1.77857	0.372942	5.35724	0.164057	174.939
ebi-a-GCST90016931	NMOSD	family Clostridiaceae1|| id:ebi-a-GCST90016931	Weighted median	10	0.268829	0.806446	0.73887	1.30843	0.269333	6.3564
ebi-a-GCST90016931	NMOSD	family Clostridiaceae1|| id:ebi-a-GCST90016931	Weighted mode	10	-0.0384469	1.12325	0.973442	0.962283	0.106457	8.69823
ebi-a-GCST90016932	NMOSD	family Clostridiales vadin BB60 group|| id:ebi-a-GCST90016932	Inverse variance weighted	14	-0.980304	0.435657	0.024438	0.375197	0.159742	0.881248
ebi-a-GCST90016932	NMOSD	family Clostridiales vadin BB60 group|| id:ebi-a-GCST90016932	MR Egger	14	-1.57074	1.20398	0.216487	0.207891	0.0196331	2.20132
ebi-a-GCST90016932	NMOSD	family Clostridiales vadin BB60 group|| id:ebi-a-GCST90016932	Weighted median	14	-1.21745	0.604463	0.0439991	0.295984	0.0905189	0.967828
ebi-a-GCST90016932	NMOSD	family Clostridiales vadin BB60 group|| id:ebi-a-GCST90016932	Weighted mode	14	-1.34597	0.901669	0.159369	0.260288	0.0444568	1.52395
ebi-a-GCST90016933	NMOSD	family Coriobacteriaceae|| id:ebi-a-GCST90016933	Inverse variance weighted	14	-0.231895	0.782878	0.767071	0.79303	0.170958	3.67865
ebi-a-GCST90016933	NMOSD	family Coriobacteriaceae|| id:ebi-a-GCST90016933	MR Egger	14	-0.650056	3.39721	0.851451	0.522017	0.000669763	406.862
ebi-a-GCST90016933	NMOSD	family Coriobacteriaceae|| id:ebi-a-GCST90016933	Weighted median	14	0.561725	0.951332	0.554882	1.75369	0.271746	11.3173
ebi-a-GCST90016933	NMOSD	family Coriobacteriaceae|| id:ebi-a-GCST90016933	Weighted mode	14	1.5504	1.68626	0.374615	4.71336	0.172965	128.44
ebi-a-GCST90016934	NMOSD	family Defluviitaleaceae|| id:ebi-a-GCST90016934	Inverse variance weighted	11	0.74037	0.435352	0.089014	2.09671	0.893221	4.92173
ebi-a-GCST90016934	NMOSD	family Defluviitaleaceae|| id:ebi-a-GCST90016934	MR Egger	11	-0.195886	1.39461	0.89139	0.822106	0.0534337	12.6485
ebi-a-GCST90016934	NMOSD	family Defluviitaleaceae|| id:ebi-a-GCST90016934	Weighted median	11	0.811468	0.549315	0.139613	2.25121	0.76706	6.60697
ebi-a-GCST90016934	NMOSD	family Defluviitaleaceae|| id:ebi-a-GCST90016934	Weighted mode	11	0.866088	0.789153	0.29815	2.37759	0.506287	11.1655
ebi-a-GCST90016935	NMOSD	family Desulfovibrionaceae|| id:ebi-a-GCST90016935	Inverse variance weighted	10	-0.0883221	0.694679	0.898829	0.915466	0.234595	3.57244
ebi-a-GCST90016935	NMOSD	family Desulfovibrionaceae|| id:ebi-a-GCST90016935	MR Egger	10	-0.691746	1.90258	0.72559	0.500701	0.0120246	20.849
ebi-a-GCST90016935	NMOSD	family Desulfovibrionaceae|| id:ebi-a-GCST90016935	Weighted median	10	-0.912806	0.797433	0.252341	0.401396	0.0840978	1.91585
ebi-a-GCST90016935	NMOSD	family Desulfovibrionaceae|| id:ebi-a-GCST90016935	Weighted mode	10	-1.1449	1.00482	0.28395	0.318256	0.0444077	2.28085
ebi-a-GCST90016936	NMOSD	family Enterobacteriaceae|| id:ebi-a-GCST90016936	Inverse variance weighted (multiplicative random effects)	6	0.48208	1.19394	0.68638	1.61944	0.155978	16.8138
ebi-a-GCST90016936	NMOSD	family Enterobacteriaceae|| id:ebi-a-GCST90016936	MR Egger	6	8.0268	6.97798	0.31411	3061.93	0.00351735	2.66548e+09
ebi-a-GCST90016936	NMOSD	family Enterobacteriaceae|| id:ebi-a-GCST90016936	Weighted median	6	-0.410396	1.11974	0.713985	0.663388	0.0738968	5.95538
ebi-a-GCST90016936	NMOSD	family Enterobacteriaceae|| id:ebi-a-GCST90016936	Weighted mode	6	-0.33219	1.63264	0.846791	0.717351	0.0292415	17.598
ebi-a-GCST90016937	NMOSD	family Erysipelotrichaceae|| id:ebi-a-GCST90016937	Inverse variance weighted	13	-1.27231	0.673108	0.0587306	0.280183	0.0748999	1.0481
ebi-a-GCST90016937	NMOSD	family Erysipelotrichaceae|| id:ebi-a-GCST90016937	MR Egger	13	-4.60764	2.82515	0.131176	0.00997532	3.92744e-05	2.53364
ebi-a-GCST90016937	NMOSD	family Erysipelotrichaceae|| id:ebi-a-GCST90016937	Weighted median	13	-1.75765	0.823996	0.0329176	0.172449	0.0342974	0.867081
ebi-a-GCST90016937	NMOSD	family Erysipelotrichaceae|| id:ebi-a-GCST90016937	Weighted mode	13	-2.14927	1.29918	0.123961	0.116569	0.00913476	1.48754
ebi-a-GCST90016938	NMOSD	family Family XI|| id:ebi-a-GCST90016938	Inverse variance weighted	8	-0.0143223	0.452907	0.974773	0.98578	0.405749	2.39498
ebi-a-GCST90016938	NMOSD	family Family XI|| id:ebi-a-GCST90016938	MR Egger	8	-5.01003	2.3372	0.0757725	0.00667068	6.83445e-05	0.651083
ebi-a-GCST90016938	NMOSD	family Family XI|| id:ebi-a-GCST90016938	Weighted median	8	0.286211	0.425338	0.501009	1.33137	0.578422	3.06447
ebi-a-GCST90016938	NMOSD	family Family XI|| id:ebi-a-GCST90016938	Weighted mode	8	0.597203	0.57482	0.333383	1.81703	0.588932	5.60607
ebi-a-GCST90016939	NMOSD	family Family XIII|| id:ebi-a-GCST90016939	Inverse variance weighted (multiplicative random effects)	10	0.655827	1.05625	0.534663	1.92673	0.243068	15.2727
ebi-a-GCST90016939	NMOSD	family Family XIII|| id:ebi-a-GCST90016939	MR Egger	10	-1.13389	4.38057	0.80229	0.321779	6.00815e-05	1723.35
ebi-a-GCST90016939	NMOSD	family Family XIII|| id:ebi-a-GCST90016939	Weighted median	10	0.162646	1.06556	0.878683	1.17662	0.145752	9.49855
ebi-a-GCST90016939	NMOSD	family Family XIII|| id:ebi-a-GCST90016939	Weighted mode	10	-1.09841	1.58345	0.505388	0.3334	0.0149661	7.42717
ebi-a-GCST90016940	NMOSD	family Lachnospiraceae|| id:ebi-a-GCST90016940	Inverse variance weighted	17	0.521859	0.506117	0.302493	1.68516	0.62492	4.54419
ebi-a-GCST90016940	NMOSD	family Lachnospiraceae|| id:ebi-a-GCST90016940	MR Egger	17	1.37941	1.31867	0.312097	3.97254	0.299639	52.6671
ebi-a-GCST90016940	NMOSD	family Lachnospiraceae|| id:ebi-a-GCST90016940	Weighted median	17	0.0241435	0.700999	0.972525	1.02444	0.259288	4.04751
ebi-a-GCST90016940	NMOSD	family Lachnospiraceae|| id:ebi-a-GCST90016940	Weighted mode	17	-0.600798	1.3402	0.659956	0.548374	0.0396528	7.58368
ebi-a-GCST90016941	NMOSD	family Lactobacillaceae|| id:ebi-a-GCST90016941	Inverse variance weighted	9	-0.446259	0.430571	0.299999	0.640018	0.275222	1.48834
ebi-a-GCST90016941	NMOSD	family Lactobacillaceae|| id:ebi-a-GCST90016941	MR Egger	9	0.811231	1.15564	0.505359	2.25068	0.233674	21.6779
ebi-a-GCST90016941	NMOSD	family Lactobacillaceae|| id:ebi-a-GCST90016941	Weighted median	9	0.00199085	0.58048	0.997264	1.00199	0.321181	3.12593
ebi-a-GCST90016941	NMOSD	family Lactobacillaceae|| id:ebi-a-GCST90016941	Weighted mode	9	0.229359	0.747288	0.76674	1.25779	0.29074	5.44145
ebi-a-GCST90016942	NMOSD	family Methanobacteriaceae|| id:ebi-a-GCST90016942	Inverse variance weighted	10	0.303899	0.335516	0.365059	1.35513	0.702077	2.61565
ebi-a-GCST90016942	NMOSD	family Methanobacteriaceae|| id:ebi-a-GCST90016942	MR Egger	10	-0.60797	1.47515	0.691058	0.544455	0.0302196	9.80924
ebi-a-GCST90016942	NMOSD	family Methanobacteriaceae|| id:ebi-a-GCST90016942	Weighted median	10	0.530051	0.419668	0.20658	1.69902	0.746397	3.86747
ebi-a-GCST90016942	NMOSD	family Methanobacteriaceae|| id:ebi-a-GCST90016942	Weighted mode	10	1.05583	0.771677	0.204424	2.87436	0.633398	13.0439
ebi-a-GCST90016943	NMOSD	family Oxalobacteraceae|| id:ebi-a-GCST90016943	Inverse variance weighted	14	-0.310381	0.322134	0.335289	0.733168	0.38994	1.37851
ebi-a-GCST90016943	NMOSD	family Oxalobacteraceae|| id:ebi-a-GCST90016943	MR Egger	14	2.53809	1.2439	0.0639421	12.6554	1.10523	144.912
ebi-a-GCST90016943	NMOSD	family Oxalobacteraceae|| id:ebi-a-GCST90016943	Weighted median	14	-0.281449	0.423858	0.50668	0.754689	0.328831	1.73206
ebi-a-GCST90016943	NMOSD	family Oxalobacteraceae|| id:ebi-a-GCST90016943	Weighted mode	14	-0.0510496	0.749621	0.946742	0.950232	0.218645	4.12971
ebi-a-GCST90016944	NMOSD	family Pasteurellaceae|| id:ebi-a-GCST90016944	Inverse variance weighted	14	0.23699	0.377466	0.530106	1.26743	0.604809	2.656
ebi-a-GCST90016944	NMOSD	family Pasteurellaceae|| id:ebi-a-GCST90016944	MR Egger	14	0.665377	0.883257	0.46578	1.94522	0.34445	10.9853
ebi-a-GCST90016944	NMOSD	family Pasteurellaceae|| id:ebi-a-GCST90016944	Weighted median	14	-0.167139	0.518205	0.747048	0.846082	0.306413	2.33624
ebi-a-GCST90016944	NMOSD	family Pasteurellaceae|| id:ebi-a-GCST90016944	Weighted mode	14	-0.359873	0.811319	0.66465	0.697765	0.142266	3.4223
ebi-a-GCST90016945	NMOSD	family Peptococcaceae|| id:ebi-a-GCST90016945	Inverse variance weighted	9	0.341394	0.50089	0.495508	1.40691	0.527108	3.75518
ebi-a-GCST90016945	NMOSD	family Peptococcaceae|| id:ebi-a-GCST90016945	MR Egger	9	0.100671	1.22009	0.93655	1.10591	0.101195	12.086
ebi-a-GCST90016945	NMOSD	family Peptococcaceae|| id:ebi-a-GCST90016945	Weighted median	9	0.160664	0.700429	0.818574	1.17429	0.297549	4.63439
ebi-a-GCST90016945	NMOSD	family Peptococcaceae|| id:ebi-a-GCST90016945	Weighted mode	9	0.183431	0.898645	0.843357	1.20133	0.206405	6.99206
ebi-a-GCST90016946	NMOSD	family Peptostreptococcaceae|| id:ebi-a-GCST90016946	Inverse variance weighted	12	0.877212	0.517085	0.0897998	2.40419	0.872602	6.62399
ebi-a-GCST90016946	NMOSD	family Peptostreptococcaceae|| id:ebi-a-GCST90016946	MR Egger	12	2.74882	1.18641	0.042998	15.6242	1.52722	159.844
ebi-a-GCST90016946	NMOSD	family Peptostreptococcaceae|| id:ebi-a-GCST90016946	Weighted median	12	1.45147	0.698642	0.0377498	4.26939	1.0856	16.7904
ebi-a-GCST90016946	NMOSD	family Peptostreptococcaceae|| id:ebi-a-GCST90016946	Weighted mode	12	1.71623	0.9341	0.0933053	5.56351	0.891718	34.7113
ebi-a-GCST90016947	NMOSD	family Porphyromonadaceae|| id:ebi-a-GCST90016947	Inverse variance weighted	9	0.135668	0.744603	0.855424	1.1453	0.266134	4.92877
ebi-a-GCST90016947	NMOSD	family Porphyromonadaceae|| id:ebi-a-GCST90016947	MR Egger	9	1.35128	3.07927	0.67401	3.86236	0.00924111	1614.29
ebi-a-GCST90016947	NMOSD	family Porphyromonadaceae|| id:ebi-a-GCST90016947	Weighted median	9	-0.0249746	0.952574	0.979083	0.975335	0.150767	6.30959
ebi-a-GCST90016947	NMOSD	family Porphyromonadaceae|| id:ebi-a-GCST90016947	Weighted mode	9	0.503515	1.34943	0.718745	1.65453	0.117493	23.2989
ebi-a-GCST90016948	NMOSD	family Prevotellaceae|| id:ebi-a-GCST90016948	Inverse variance weighted	16	0.160055	0.483766	0.740757	1.17357	0.454695	3.02901
ebi-a-GCST90016948	NMOSD	family Prevotellaceae|| id:ebi-a-GCST90016948	MR Egger	16	-0.168511	1.67664	0.921368	0.844922	0.0315962	22.5943
ebi-a-GCST90016948	NMOSD	family Prevotellaceae|| id:ebi-a-GCST90016948	Weighted median	16	0.441617	0.643831	0.492763	1.55522	0.440303	5.49328
ebi-a-GCST90016948	NMOSD	family Prevotellaceae|| id:ebi-a-GCST90016948	Weighted mode	16	0.327578	1.08452	0.766762	1.3876	0.165617	11.6259
ebi-a-GCST90016949	NMOSD	family Rhodospirillaceae|| id:ebi-a-GCST90016949	Inverse variance weighted	15	0.604668	0.456144	0.184969	1.83064	0.748733	4.47591
ebi-a-GCST90016949	NMOSD	family Rhodospirillaceae|| id:ebi-a-GCST90016949	MR Egger	15	1.10914	2.29859	0.637451	3.03176	0.0335042	274.341
ebi-a-GCST90016949	NMOSD	family Rhodospirillaceae|| id:ebi-a-GCST90016949	Weighted median	15	0.0392705	0.569344	0.94501	1.04005	0.340737	3.17461
ebi-a-GCST90016949	NMOSD	family Rhodospirillaceae|| id:ebi-a-GCST90016949	Weighted mode	15	0.0248603	0.994994	0.980419	1.02517	0.145828	7.20696
ebi-a-GCST90016950	NMOSD	family Rikenellaceae|| id:ebi-a-GCST90016950	Inverse variance weighted	19	-0.209393	0.490551	0.669487	0.811077	0.310096	2.12142
ebi-a-GCST90016950	NMOSD	family Rikenellaceae|| id:ebi-a-GCST90016950	MR Egger	19	-1.51514	1.49631	0.325455	0.219778	0.0117031	4.1273
ebi-a-GCST90016950	NMOSD	family Rikenellaceae|| id:ebi-a-GCST90016950	Weighted median	19	-0.156882	0.641123	0.80669	0.854805	0.243294	3.00332
ebi-a-GCST90016950	NMOSD	family Rikenellaceae|| id:ebi-a-GCST90016950	Weighted mode	19	0.193384	1.13539	0.866656	1.21335	0.131075	11.2319
ebi-a-GCST90016951	NMOSD	family Ruminococcaceae|| id:ebi-a-GCST90016951	Inverse variance weighted	10	1.08079	0.603902	0.0735048	2.94702	0.902258	9.62574
ebi-a-GCST90016951	NMOSD	family Ruminococcaceae|| id:ebi-a-GCST90016951	MR Egger	10	0.670415	1.33149	0.628176	1.95505	0.143804	26.5793
ebi-a-GCST90016951	NMOSD	family Ruminococcaceae|| id:ebi-a-GCST90016951	Weighted median	10	0.962987	0.804311	0.231197	2.61951	0.541472	12.6725
ebi-a-GCST90016951	NMOSD	family Ruminococcaceae|| id:ebi-a-GCST90016951	Weighted mode	10	0.870023	1.10663	0.451956	2.38697	0.272814	20.8846
ebi-a-GCST90016952	NMOSD	family Streptococcaceae|| id:ebi-a-GCST90016952	Inverse variance weighted	14	0.924322	0.567484	0.103354	2.52016	0.828658	7.66444
ebi-a-GCST90016952	NMOSD	family Streptococcaceae|| id:ebi-a-GCST90016952	MR Egger	14	0.647214	2.28557	0.781869	1.91021	0.0216554	168.499
ebi-a-GCST90016952	NMOSD	family Streptococcaceae|| id:ebi-a-GCST90016952	Weighted median	14	1.06561	0.743936	0.152029	2.90262	0.675366	12.475
ebi-a-GCST90016952	NMOSD	family Streptococcaceae|| id:ebi-a-GCST90016952	Weighted mode	14	1.20722	1.24302	0.349173	3.34417	0.292557	38.2267
ebi-a-GCST90016956	NMOSD	family Veillonellaceae|| id:ebi-a-GCST90016956	Inverse variance weighted (multiplicative random effects)	19	0.811832	0.568241	0.153097	2.25203	0.739397	6.85915
ebi-a-GCST90016956	NMOSD	family Veillonellaceae|| id:ebi-a-GCST90016956	MR Egger	19	1.32319	1.24095	0.301211	3.75538	0.329864	42.7536
ebi-a-GCST90016956	NMOSD	family Veillonellaceae|| id:ebi-a-GCST90016956	Weighted median	19	0.191269	0.646999	0.767517	1.21079	0.340667	4.30332
ebi-a-GCST90016956	NMOSD	family Veillonellaceae|| id:ebi-a-GCST90016956	Weighted mode	19	0.00289699	1.05144	0.997832	1.0029	0.127719	7.87517
ebi-a-GCST90016957	NMOSD	family Verrucomicrobiaceae|| id:ebi-a-GCST90016957	Inverse variance weighted	11	0.637994	0.543039	0.240052	1.89268	0.652879	5.48683
ebi-a-GCST90016957	NMOSD	family Verrucomicrobiaceae|| id:ebi-a-GCST90016957	MR Egger	11	2.1956	1.88103	0.273109	8.98536	0.225099	358.672
ebi-a-GCST90016957	NMOSD	family Verrucomicrobiaceae|| id:ebi-a-GCST90016957	Weighted median	11	-0.0356073	0.769054	0.963071	0.965019	0.213749	4.35681
ebi-a-GCST90016957	NMOSD	family Verrucomicrobiaceae|| id:ebi-a-GCST90016957	Weighted mode	11	-0.508431	1.3317	0.710604	0.601438	0.0442206	8.18008
ebi-a-GCST90016958	NMOSD	family Victivallaceae|| id:ebi-a-GCST90016958	Inverse variance weighted	11	-0.146644	0.369027	0.691088	0.863602	0.418978	1.78006
ebi-a-GCST90016958	NMOSD	family Victivallaceae|| id:ebi-a-GCST90016958	MR Egger	11	1.08228	1.82037	0.566796	2.95141	0.0832715	104.607
ebi-a-GCST90016958	NMOSD	family Victivallaceae|| id:ebi-a-GCST90016958	Weighted median	11	-0.0864351	0.420578	0.83717	0.917195	0.402215	2.09153
ebi-a-GCST90016958	NMOSD	family Victivallaceae|| id:ebi-a-GCST90016958	Weighted mode	11	0.0953622	0.635259	0.883658	1.10006	0.316717	3.82084
ebi-a-GCST90016959	NMOSD	genus Actinomycesgenus Actinomyces|| id:ebi-a-GCST90016959	Inverse variance weighted	7	-0.783962	0.513803	0.127059	0.456593	0.166791	1.24994
ebi-a-GCST90016959	NMOSD	genus Actinomycesgenus Actinomyces|| id:ebi-a-GCST90016959	MR Egger	7	0.0307348	1.43651	0.983758	1.03121	0.0617403	17.2237
ebi-a-GCST90016959	NMOSD	genus Actinomycesgenus Actinomyces|| id:ebi-a-GCST90016959	Weighted median	7	-0.713601	0.690863	0.301645	0.489877	0.126477	1.89741
ebi-a-GCST90016959	NMOSD	genus Actinomycesgenus Actinomyces|| id:ebi-a-GCST90016959	Weighted mode	7	-0.833847	0.99401	0.433684	0.434375	0.061908	3.04778
ebi-a-GCST90016960	NMOSD	genus Adlercreutziagenus Adlercreutzia|| id:ebi-a-GCST90016960	Inverse variance weighted	8	-0.0949689	0.66656	0.886704	0.909401	0.246245	3.35848
ebi-a-GCST90016960	NMOSD	genus Adlercreutziagenus Adlercreutzia|| id:ebi-a-GCST90016960	MR Egger	8	-2.81852	3.08263	0.395804	0.0596941	0.000141886	25.1144
ebi-a-GCST90016960	NMOSD	genus Adlercreutziagenus Adlercreutzia|| id:ebi-a-GCST90016960	Weighted median	8	-0.20094	0.730642	0.783302	0.817961	0.195343	3.42505
ebi-a-GCST90016960	NMOSD	genus Adlercreutziagenus Adlercreutzia|| id:ebi-a-GCST90016960	Weighted mode	8	-0.275589	1.07525	0.805086	0.759125	0.0922664	6.24573
ebi-a-GCST90016961	NMOSD	genus Akkermansiagenus Akkermansia|| id:ebi-a-GCST90016961	Inverse variance weighted	11	0.634461	0.543142	0.242754	1.886	0.650445	5.46858
ebi-a-GCST90016961	NMOSD	genus Akkermansiagenus Akkermansia|| id:ebi-a-GCST90016961	MR Egger	11	2.15377	1.88353	0.282344	8.61726	0.214823	345.667
ebi-a-GCST90016961	NMOSD	genus Akkermansiagenus Akkermansia|| id:ebi-a-GCST90016961	Weighted median	11	-0.0374852	0.729097	0.958996	0.963209	0.230728	4.02106
ebi-a-GCST90016961	NMOSD	genus Akkermansiagenus Akkermansia|| id:ebi-a-GCST90016961	Weighted mode	11	-0.499425	1.30376	0.709689	0.606879	0.0471321	7.81427
ebi-a-GCST90016962	NMOSD	genus Alistipesgenus Alistipes|| id:ebi-a-GCST90016962	Inverse variance weighted	13	-0.0608726	0.630265	0.923058	0.940943	0.273571	3.23635
ebi-a-GCST90016962	NMOSD	genus Alistipesgenus Alistipes|| id:ebi-a-GCST90016962	MR Egger	13	-1.43085	3.04977	0.648113	0.239106	0.000606141	94.3209
ebi-a-GCST90016962	NMOSD	genus Alistipesgenus Alistipes|| id:ebi-a-GCST90016962	Weighted median	13	-0.515445	0.863092	0.550369	0.597235	0.110019	3.24208
ebi-a-GCST90016962	NMOSD	genus Alistipesgenus Alistipes|| id:ebi-a-GCST90016962	Weighted mode	13	-0.92153	1.43889	0.533923	0.39791	0.0237123	6.67721
ebi-a-GCST90016963	NMOSD	genus Allisonellagenus Allisonella|| id:ebi-a-GCST90016963	Inverse variance weighted	8	0.0105852	0.345241	0.97554	1.01064	0.513715	1.98826
ebi-a-GCST90016963	NMOSD	genus Allisonellagenus Allisonella|| id:ebi-a-GCST90016963	MR Egger	8	-0.685867	2.48388	0.791715	0.503653	0.00387088	65.5321
ebi-a-GCST90016963	NMOSD	genus Allisonellagenus Allisonella|| id:ebi-a-GCST90016963	Weighted median	8	-0.1197	0.461994	0.795563	0.887186	0.358721	2.19418
ebi-a-GCST90016963	NMOSD	genus Allisonellagenus Allisonella|| id:ebi-a-GCST90016963	Weighted mode	8	-0.584479	0.671494	0.412924	0.557396	0.149478	2.0785
ebi-a-GCST90016964	NMOSD	genus Alloprevotellagenus Alloprevotella|| id:ebi-a-GCST90016964	Inverse variance weighted	6	-0.0865314	0.448766	0.847099	0.917107	0.380559	2.21013
ebi-a-GCST90016964	NMOSD	genus Alloprevotellagenus Alloprevotella|| id:ebi-a-GCST90016964	MR Egger	6	-4.66227	4.06545	0.315398	0.00944504	3.27057e-06	27.2763
ebi-a-GCST90016964	NMOSD	genus Alloprevotellagenus Alloprevotella|| id:ebi-a-GCST90016964	Weighted median	6	-0.494958	0.48736	0.309824	0.609597	0.234527	1.5845
ebi-a-GCST90016964	NMOSD	genus Alloprevotellagenus Alloprevotella|| id:ebi-a-GCST90016964	Weighted mode	6	-0.731433	0.734747	0.365204	0.481219	0.114002	2.03129
ebi-a-GCST90016965	NMOSD	genus Anaerofilumgenus Anaerofilum|| id:ebi-a-GCST90016965	Inverse variance weighted	11	-0.267897	0.355577	0.4512	0.764986	0.381049	1.53577
ebi-a-GCST90016965	NMOSD	genus Anaerofilumgenus Anaerofilum|| id:ebi-a-GCST90016965	MR Egger	11	-0.517181	1.84675	0.78577	0.596199	0.0159737	22.2525
ebi-a-GCST90016965	NMOSD	genus Anaerofilumgenus Anaerofilum|| id:ebi-a-GCST90016965	Weighted median	11	0.050177	0.473598	0.915623	1.05146	0.415582	2.66028
ebi-a-GCST90016965	NMOSD	genus Anaerofilumgenus Anaerofilum|| id:ebi-a-GCST90016965	Weighted mode	11	0.431467	0.790839	0.597312	1.53951	0.326744	7.2537
ebi-a-GCST90016966	NMOSD	genus Anaerostipesgenus Anaerostipes|| id:ebi-a-GCST90016966	Inverse variance weighted	13	0.536863	0.587789	0.361053	1.71063	0.540531	5.41368
ebi-a-GCST90016966	NMOSD	genus Anaerostipesgenus Anaerostipes|| id:ebi-a-GCST90016966	MR Egger	13	0.0347642	2.04505	0.986742	1.03538	0.0188069	57.0005
ebi-a-GCST90016966	NMOSD	genus Anaerostipesgenus Anaerostipes|| id:ebi-a-GCST90016966	Weighted median	13	0.439469	0.742558	0.553964	1.55188	0.36206	6.65176
ebi-a-GCST90016966	NMOSD	genus Anaerostipesgenus Anaerostipes|| id:ebi-a-GCST90016966	Weighted mode	13	0.39585	1.07501	0.719117	1.48565	0.180654	12.2175
ebi-a-GCST90016967	NMOSD	genus Anaerotruncusgenus Anaerotruncus|| id:ebi-a-GCST90016967	Inverse variance weighted (multiplicative random effects)	13	-0.173288	0.921692	0.850869	0.840896	0.138096	5.12038
ebi-a-GCST90016967	NMOSD	genus Anaerotruncusgenus Anaerotruncus|| id:ebi-a-GCST90016967	MR Egger	13	-1.36619	3.03231	0.661068	0.255076	0.000669138	97.2354
ebi-a-GCST90016967	NMOSD	genus Anaerotruncusgenus Anaerotruncus|| id:ebi-a-GCST90016967	Weighted median	13	-0.526608	0.908929	0.562338	0.590605	0.0994492	3.50746
ebi-a-GCST90016967	NMOSD	genus Anaerotruncusgenus Anaerotruncus|| id:ebi-a-GCST90016967	Weighted mode	13	-1.67632	1.69802	0.343023	0.187061	0.00670811	5.21636
ebi-a-GCST90016968	NMOSD	genus Bacteroidesgenus Bacteroides|| id:ebi-a-GCST90016968	Inverse variance weighted (multiplicative random effects)	9	0.0750043	1.14606	0.947819	1.07789	0.114032	10.1888
ebi-a-GCST90016968	NMOSD	genus Bacteroidesgenus Bacteroides|| id:ebi-a-GCST90016968	MR Egger	9	6.93604	5.77887	0.269084	1028.69	0.012394	8.53796e+07
ebi-a-GCST90016968	NMOSD	genus Bacteroidesgenus Bacteroides|| id:ebi-a-GCST90016968	Weighted median	9	1.06685	1.15341	0.35499	2.90621	0.303058	27.8695
ebi-a-GCST90016968	NMOSD	genus Bacteroidesgenus Bacteroides|| id:ebi-a-GCST90016968	Weighted mode	9	2.74213	2.21266	0.250359	15.52	0.202975	1186.7
ebi-a-GCST90016969	NMOSD	genus Barnesiellagenus Barnesiella|| id:ebi-a-GCST90016969	Inverse variance weighted	14	1.08196	0.507558	0.0330311	2.95047	1.09106	7.9787
ebi-a-GCST90016969	NMOSD	genus Barnesiellagenus Barnesiella|| id:ebi-a-GCST90016969	MR Egger	14	0.79138	1.70481	0.65081	2.20644	0.0780781	62.3527
ebi-a-GCST90016969	NMOSD	genus Barnesiellagenus Barnesiella|| id:ebi-a-GCST90016969	Weighted median	14	1.00174	0.676642	0.13875	2.72303	0.722907	10.257
ebi-a-GCST90016969	NMOSD	genus Barnesiellagenus Barnesiella|| id:ebi-a-GCST90016969	Weighted mode	14	0.362799	1.12256	0.751692	1.43735	0.159228	12.9749
ebi-a-GCST90016970	NMOSD	genus Bifidobacteriumgenus Bifidobacterium|| id:ebi-a-GCST90016970	Inverse variance weighted	13	0.161589	0.491465	0.742315	1.17538	0.448574	3.07979
ebi-a-GCST90016970	NMOSD	genus Bifidobacteriumgenus Bifidobacterium|| id:ebi-a-GCST90016970	MR Egger	13	-1.22633	1.28844	0.361648	0.293367	0.0234782	3.6657
ebi-a-GCST90016970	NMOSD	genus Bifidobacteriumgenus Bifidobacterium|| id:ebi-a-GCST90016970	Weighted median	13	-0.651293	0.67034	0.331256	0.521371	0.140134	1.93978
ebi-a-GCST90016970	NMOSD	genus Bifidobacteriumgenus Bifidobacterium|| id:ebi-a-GCST90016970	Weighted mode	13	-0.775788	0.909959	0.410601	0.460341	0.0773583	2.73938
ebi-a-GCST90016971	NMOSD	genus Bilophilagenus Bilophila|| id:ebi-a-GCST90016971	Inverse variance weighted	13	-0.0694975	0.52091	0.893865	0.932862	0.336055	2.58956
ebi-a-GCST90016971	NMOSD	genus Bilophilagenus Bilophila|| id:ebi-a-GCST90016971	MR Egger	13	-1.75188	2.38651	0.478258	0.173447	0.00161336	18.6469
ebi-a-GCST90016971	NMOSD	genus Bilophilagenus Bilophila|| id:ebi-a-GCST90016971	Weighted median	13	-0.149606	0.678166	0.8254	0.861047	0.227908	3.25307
ebi-a-GCST90016971	NMOSD	genus Bilophilagenus Bilophila|| id:ebi-a-GCST90016971	Weighted mode	13	0.598135	1.01346	0.56601	1.81872	0.249514	13.2568
ebi-a-GCST90016972	NMOSD	genus Blautiagenus Blautia|| id:ebi-a-GCST90016972	Inverse variance weighted	2	1.04404	1.17329	0.373553	2.84067	0.284901	28.3237
ebi-a-GCST90016973	NMOSD	genus Butyricicoccusgenus Butyricicoccus|| id:ebi-a-GCST90016973	Inverse variance weighted	8	-0.457821	0.596219	0.442562	0.63266	0.196634	2.03555
ebi-a-GCST90016973	NMOSD	genus Butyricicoccusgenus Butyricicoccus|| id:ebi-a-GCST90016973	MR Egger	8	-1.30907	1.08222	0.271918	0.270071	0.0323801	2.25258
ebi-a-GCST90016973	NMOSD	genus Butyricicoccusgenus Butyricicoccus|| id:ebi-a-GCST90016973	Weighted median	8	-0.465319	0.819361	0.570099	0.627935	0.126026	3.12874
ebi-a-GCST90016973	NMOSD	genus Butyricicoccusgenus Butyricicoccus|| id:ebi-a-GCST90016973	Weighted mode	8	-0.38308	0.96617	0.70355	0.681759	0.102615	4.52951
ebi-a-GCST90016974	NMOSD	genus Butyricimonasgenus Butyricimonas|| id:ebi-a-GCST90016974	Inverse variance weighted	13	-0.0860895	0.525521	0.869875	0.917512	0.327551	2.57007
ebi-a-GCST90016974	NMOSD	genus Butyricimonasgenus Butyricimonas|| id:ebi-a-GCST90016974	MR Egger	13	2.2456	1.66053	0.203414	9.44608	0.364569	244.75
ebi-a-GCST90016974	NMOSD	genus Butyricimonasgenus Butyricimonas|| id:ebi-a-GCST90016974	Weighted median	13	-0.600925	0.656897	0.3603	0.548304	0.151307	1.98693
ebi-a-GCST90016974	NMOSD	genus Butyricimonasgenus Butyricimonas|| id:ebi-a-GCST90016974	Weighted mode	13	-1.34494	1.20127	0.284797	0.260556	0.0247375	2.74439
ebi-a-GCST90016975	NMOSD	genus Butyrivibriogenus Butyrivibrio|| id:ebi-a-GCST90016975	Inverse variance weighted	15	0.0981306	0.264553	0.710689	1.10311	0.656789	1.85272
ebi-a-GCST90016975	NMOSD	genus Butyrivibriogenus Butyrivibrio|| id:ebi-a-GCST90016975	MR Egger	15	0.566086	1.20445	0.646145	1.76136	0.166188	18.6679
ebi-a-GCST90016975	NMOSD	genus Butyrivibriogenus Butyrivibrio|| id:ebi-a-GCST90016975	Weighted median	15	0.0887438	0.359144	0.804832	1.0928	0.540544	2.20928
ebi-a-GCST90016975	NMOSD	genus Butyrivibriogenus Butyrivibrio|| id:ebi-a-GCST90016975	Weighted mode	15	-0.00474876	0.660641	0.994366	0.995263	0.27264	3.63318
ebi-a-GCST90016976	NMOSD	genus Candidatus Soleaferreagenus Candidatus Soleaferrea|| id:ebi-a-GCST90016976	Inverse variance weighted	10	-0.0914932	0.422906	0.828719	0.912568	0.398364	2.0905
ebi-a-GCST90016976	NMOSD	genus Candidatus Soleaferreagenus Candidatus Soleaferrea|| id:ebi-a-GCST90016976	MR Egger	10	-3.73055	4.52286	0.433377	0.0239796	3.38768e-06	169.739
ebi-a-GCST90016976	NMOSD	genus Candidatus Soleaferreagenus Candidatus Soleaferrea|| id:ebi-a-GCST90016976	Weighted median	10	0.00957745	0.53775	0.98579	1.00962	0.351898	2.89669
ebi-a-GCST90016976	NMOSD	genus Candidatus Soleaferreagenus Candidatus Soleaferrea|| id:ebi-a-GCST90016976	Weighted mode	10	0.349583	0.823843	0.681286	1.41848	0.282197	7.13003
ebi-a-GCST90016977	NMOSD	genus Catenibacteriumgenus Catenibacterium|| id:ebi-a-GCST90016977	Inverse variance weighted	5	0.0658622	0.414619	0.873787	1.06808	0.473885	2.40732
ebi-a-GCST90016977	NMOSD	genus Catenibacteriumgenus Catenibacterium|| id:ebi-a-GCST90016977	MR Egger	5	-1.61918	3.7858	0.697714	0.198061	0.000118649	330.623
ebi-a-GCST90016977	NMOSD	genus Catenibacteriumgenus Catenibacterium|| id:ebi-a-GCST90016977	Weighted median	5	-0.0576956	0.543838	0.915511	0.943937	0.325102	2.74074
ebi-a-GCST90016977	NMOSD	genus Catenibacteriumgenus Catenibacterium|| id:ebi-a-GCST90016977	Weighted mode	5	-0.486999	0.80273	0.576812	0.614467	0.127409	2.96344
ebi-a-GCST90016978	NMOSD	genus Christensenellaceae R 7groupgenus Christensenellaceae R 7group|| id:ebi-a-GCST90016978	Inverse variance weighted	10	-0.681335	0.679178	0.315776	0.505941	0.133651	1.91526
ebi-a-GCST90016978	NMOSD	genus Christensenellaceae R 7groupgenus Christensenellaceae R 7group|| id:ebi-a-GCST90016978	MR Egger	10	0.202638	2.04805	0.923619	1.22463	0.022114	67.8174
ebi-a-GCST90016978	NMOSD	genus Christensenellaceae R 7groupgenus Christensenellaceae R 7group|| id:ebi-a-GCST90016978	Weighted median	10	-0.495	0.860761	0.565242	0.609571	0.112805	3.29396
ebi-a-GCST90016978	NMOSD	genus Christensenellaceae R 7groupgenus Christensenellaceae R 7group|| id:ebi-a-GCST90016978	Weighted mode	10	-0.332477	1.34441	0.810224	0.717145	0.0514303	9.99989
ebi-a-GCST90016979	NMOSD	genus Clostridium innocuum groupgenus Clostridium innocuum group|| id:ebi-a-GCST90016979	Inverse variance weighted (multiplicative random effects)	9	0.212484	0.528197	0.687477	1.23675	0.439208	3.4825
ebi-a-GCST90016979	NMOSD	genus Clostridium innocuum groupgenus Clostridium innocuum group|| id:ebi-a-GCST90016979	MR Egger	9	3.40206	2.60589	0.232982	30.0258	0.181684	4962.18
ebi-a-GCST90016979	NMOSD	genus Clostridium innocuum groupgenus Clostridium innocuum group|| id:ebi-a-GCST90016979	Weighted median	9	-0.0721464	0.527358	0.891183	0.930395	0.330957	2.61555
ebi-a-GCST90016979	NMOSD	genus Clostridium innocuum groupgenus Clostridium innocuum group|| id:ebi-a-GCST90016979	Weighted mode	9	-0.338265	0.81765	0.689959	0.713006	0.143581	3.54072
ebi-a-GCST90016980	NMOSD	genus Clostridium sensustricto1genus Clostridium sensustricto1|| id:ebi-a-GCST90016980	Inverse variance weighted	7	0.0187639	0.710576	0.978933	1.01894	0.253101	4.10207
ebi-a-GCST90016980	NMOSD	genus Clostridium sensustricto1genus Clostridium sensustricto1|| id:ebi-a-GCST90016980	MR Egger	7	-1.34087	1.51484	0.416604	0.261618	0.0134341	5.09479
ebi-a-GCST90016980	NMOSD	genus Clostridium sensustricto1genus Clostridium sensustricto1|| id:ebi-a-GCST90016980	Weighted median	7	-0.379965	0.801663	0.63552	0.683885	0.1421	3.29134
ebi-a-GCST90016980	NMOSD	genus Clostridium sensustricto1genus Clostridium sensustricto1|| id:ebi-a-GCST90016980	Weighted mode	7	-0.545941	0.895121	0.564292	0.579296	0.100221	3.34844
ebi-a-GCST90016981	NMOSD	genus Collinsellagenus Collinsella|| id:ebi-a-GCST90016981	Inverse variance weighted	9	-0.305795	0.686058	0.655794	0.736538	0.19196	2.82605
ebi-a-GCST90016981	NMOSD	genus Collinsellagenus Collinsella|| id:ebi-a-GCST90016981	MR Egger	9	-3.07024	2.40519	0.242492	0.04641	0.000416173	5.17546
ebi-a-GCST90016981	NMOSD	genus Collinsellagenus Collinsella|| id:ebi-a-GCST90016981	Weighted median	9	-0.60218	0.877484	0.492551	0.547616	0.0980724	3.05778
ebi-a-GCST90016981	NMOSD	genus Collinsellagenus Collinsella|| id:ebi-a-GCST90016981	Weighted mode	9	-0.581617	1.55993	0.718947	0.558994	0.0262764	11.8918
ebi-a-GCST90016982	NMOSD	genus Coprobactergenus Coprobacter|| id:ebi-a-GCST90016982	Inverse variance weighted	11	-0.117263	0.391856	0.764748	0.889351	0.41259	1.91702
ebi-a-GCST90016982	NMOSD	genus Coprobactergenus Coprobacter|| id:ebi-a-GCST90016982	MR Egger	11	0.942634	1.32434	0.494639	2.56673	0.19146	34.4098
ebi-a-GCST90016982	NMOSD	genus Coprobactergenus Coprobacter|| id:ebi-a-GCST90016982	Weighted median	11	-0.279771	0.500309	0.576027	0.755956	0.283547	2.01543
ebi-a-GCST90016982	NMOSD	genus Coprobactergenus Coprobacter|| id:ebi-a-GCST90016982	Weighted mode	11	-0.857602	0.848654	0.336061	0.424178	0.0803821	2.2384
ebi-a-GCST90016983	NMOSD	genus Coprococcus1genus Coprococcus1|| id:ebi-a-GCST90016983	Inverse variance weighted	11	-0.081971	0.729024	0.910475	0.921299	0.22072	3.84555
ebi-a-GCST90016983	NMOSD	genus Coprococcus1genus Coprococcus1|| id:ebi-a-GCST90016983	MR Egger	11	0.139463	1.78383	0.939394	1.14966	0.0348454	37.9307
ebi-a-GCST90016983	NMOSD	genus Coprococcus1genus Coprococcus1|| id:ebi-a-GCST90016983	Weighted median	11	-0.226407	0.783801	0.77269	0.797394	0.171588	3.70559
ebi-a-GCST90016983	NMOSD	genus Coprococcus1genus Coprococcus1|| id:ebi-a-GCST90016983	Weighted mode	11	0.0119449	1.09584	0.991517	1.01202	0.118138	8.66931
ebi-a-GCST90016984	NMOSD	genus Coprococcus2genus Coprococcus2|| id:ebi-a-GCST90016984	Inverse variance weighted	8	0.23366	0.63466	0.71275	1.26321	0.364119	4.38238
ebi-a-GCST90016984	NMOSD	genus Coprococcus2genus Coprococcus2|| id:ebi-a-GCST90016984	MR Egger	8	0.00324547	4.99006	0.999502	1.00325	5.67264e-05	17743.3
ebi-a-GCST90016984	NMOSD	genus Coprococcus2genus Coprococcus2|| id:ebi-a-GCST90016984	Weighted median	8	-0.376112	0.780155	0.629736	0.686525	0.14879	3.16766
ebi-a-GCST90016984	NMOSD	genus Coprococcus2genus Coprococcus2|| id:ebi-a-GCST90016984	Weighted mode	8	-0.543544	1.21519	0.668177	0.580687	0.053648	6.28536
ebi-a-GCST90016985	NMOSD	genus Coprococcus3genus Coprococcus3|| id:ebi-a-GCST90016985	Inverse variance weighted	9	0.113245	0.76893	0.882914	1.11991	0.248116	5.05485
ebi-a-GCST90016985	NMOSD	genus Coprococcus3genus Coprococcus3|| id:ebi-a-GCST90016985	MR Egger	9	-0.870884	2.98788	0.779138	0.418581	0.00119796	146.258
ebi-a-GCST90016985	NMOSD	genus Coprococcus3genus Coprococcus3|| id:ebi-a-GCST90016985	Weighted median	9	-0.677959	0.915623	0.459036	0.507652	0.0843669	3.05464
ebi-a-GCST90016985	NMOSD	genus Coprococcus3genus Coprococcus3|| id:ebi-a-GCST90016985	Weighted mode	9	-0.924517	1.26765	0.486608	0.396723	0.0330708	4.75915
ebi-a-GCST90016986	NMOSD	genus Defluviitaleaceae UCG011genus Defluviitaleaceae UCG011|| id:ebi-a-GCST90016986	Inverse variance weighted	9	0.811807	0.468489	0.0831281	2.25197	0.899036	5.64091
ebi-a-GCST90016986	NMOSD	genus Defluviitaleaceae UCG011genus Defluviitaleaceae UCG011|| id:ebi-a-GCST90016986	MR Egger	9	0.0962242	1.56003	0.952541	1.10101	0.0517445	23.4269
ebi-a-GCST90016986	NMOSD	genus Defluviitaleaceae UCG011genus Defluviitaleaceae UCG011|| id:ebi-a-GCST90016986	Weighted median	9	0.831695	0.582102	0.153068	2.29721	0.734015	7.18946
ebi-a-GCST90016986	NMOSD	genus Defluviitaleaceae UCG011genus Defluviitaleaceae UCG011|| id:ebi-a-GCST90016986	Weighted mode	9	0.808979	0.753731	0.314442	2.24561	0.512562	9.83838
ebi-a-GCST90016987	NMOSD	genus Desulfovibriogenus Desulfovibrio|| id:ebi-a-GCST90016987	Inverse variance weighted	9	0.0101781	0.501641	0.983812	1.01023	0.377933	2.70038
ebi-a-GCST90016987	NMOSD	genus Desulfovibriogenus Desulfovibrio|| id:ebi-a-GCST90016987	MR Egger	9	-0.299367	1.45184	0.842505	0.741287	0.0430682	12.759
ebi-a-GCST90016987	NMOSD	genus Desulfovibriogenus Desulfovibrio|| id:ebi-a-GCST90016987	Weighted median	9	-0.157903	0.662581	0.811636	0.853932	0.233036	3.12913
ebi-a-GCST90016987	NMOSD	genus Desulfovibriogenus Desulfovibrio|| id:ebi-a-GCST90016987	Weighted mode	9	-0.12823	0.83918	0.882336	0.879651	0.169819	4.55654
ebi-a-GCST90016988	NMOSD	genus Dialistergenus Dialister|| id:ebi-a-GCST90016988	Inverse variance weighted	10	-0.290772	0.618744	0.638398	0.747686	0.222348	2.51423
ebi-a-GCST90016988	NMOSD	genus Dialistergenus Dialister|| id:ebi-a-GCST90016988	MR Egger	10	-1.96157	2.37754	0.433258	0.140637	0.00133136	14.8561
ebi-a-GCST90016988	NMOSD	genus Dialistergenus Dialister|| id:ebi-a-GCST90016988	Weighted median	10	-0.675212	0.744879	0.364686	0.509048	0.118224	2.19186
ebi-a-GCST90016988	NMOSD	genus Dialistergenus Dialister|| id:ebi-a-GCST90016988	Weighted mode	10	-0.821908	1.0761	0.464545	0.439592	0.0533407	3.62277
ebi-a-GCST90016989	NMOSD	genus Doreagenus Dorea|| id:ebi-a-GCST90016989	Inverse variance weighted	10	0.234638	0.646809	0.716783	1.26445	0.355899	4.49239
ebi-a-GCST90016989	NMOSD	genus Doreagenus Dorea|| id:ebi-a-GCST90016989	MR Egger	10	0.369296	1.74253	0.837461	1.44672	0.0475454	44.0208
ebi-a-GCST90016989	NMOSD	genus Doreagenus Dorea|| id:ebi-a-GCST90016989	Weighted median	10	-0.175022	0.789654	0.824592	0.839439	0.178576	3.94599
ebi-a-GCST90016989	NMOSD	genus Doreagenus Dorea|| id:ebi-a-GCST90016989	Weighted mode	10	-0.380496	1.24898	0.767562	0.683522	0.0591022	7.905
ebi-a-GCST90016990	NMOSD	genus Eggerthellagenus Eggerthella|| id:ebi-a-GCST90016990	Inverse variance weighted	10	-0.883662	0.383986	0.0213754	0.413267	0.194704	0.877175
ebi-a-GCST90016990	NMOSD	genus Eggerthellagenus Eggerthella|| id:ebi-a-GCST90016990	MR Egger	10	1.38451	1.75692	0.453391	3.99287	0.127575	124.969
ebi-a-GCST90016990	NMOSD	genus Eggerthellagenus Eggerthella|| id:ebi-a-GCST90016990	Weighted median	10	-0.457873	0.483373	0.343513	0.632628	0.245298	1.63156
ebi-a-GCST90016990	NMOSD	genus Eggerthellagenus Eggerthella|| id:ebi-a-GCST90016990	Weighted mode	10	-0.393806	0.762893	0.618156	0.674485	0.151211	3.00857
ebi-a-GCST90016991	NMOSD	genus Eisenbergiellagenus Eisenbergiella|| id:ebi-a-GCST90016991	Inverse variance weighted	11	0.176085	0.381244	0.644175	1.19254	0.564873	2.51764
ebi-a-GCST90016991	NMOSD	genus Eisenbergiellagenus Eisenbergiella|| id:ebi-a-GCST90016991	MR Egger	11	-0.61159	3.0586	0.845959	0.542488	0.00135164	217.731
ebi-a-GCST90016991	NMOSD	genus Eisenbergiellagenus Eisenbergiella|| id:ebi-a-GCST90016991	Weighted median	11	0.167626	0.485168	0.729717	1.18249	0.456895	3.06043
ebi-a-GCST90016991	NMOSD	genus Eisenbergiellagenus Eisenbergiella|| id:ebi-a-GCST90016991	Weighted mode	11	0.145585	0.824829	0.863422	1.15672	0.229677	5.82554
ebi-a-GCST90016992	NMOSD	genus Enterorhabdusgenus Enterorhabdus|| id:ebi-a-GCST90016992	Inverse variance weighted	6	-0.575374	0.569638	0.312462	0.562494	0.184176	1.71792
ebi-a-GCST90016992	NMOSD	genus Enterorhabdusgenus Enterorhabdus|| id:ebi-a-GCST90016992	MR Egger	6	0.30692	1.50621	0.848481	1.35923	0.0709873	26.026
ebi-a-GCST90016992	NMOSD	genus Enterorhabdusgenus Enterorhabdus|| id:ebi-a-GCST90016992	Weighted median	6	-0.487108	0.733104	0.506405	0.614401	0.146023	2.58513
ebi-a-GCST90016992	NMOSD	genus Enterorhabdusgenus Enterorhabdus|| id:ebi-a-GCST90016992	Weighted mode	6	-0.101897	0.925381	0.916602	0.903122	0.147247	5.5392
ebi-a-GCST90016993	NMOSD	genus Erysipelatoclostridiumgenus Erysipelatoclostridium|| id:ebi-a-GCST90016993	Inverse variance weighted	15	-0.353836	0.411287	0.389617	0.70199	0.313499	1.5719
ebi-a-GCST90016993	NMOSD	genus Erysipelatoclostridiumgenus Erysipelatoclostridium|| id:ebi-a-GCST90016993	MR Egger	15	2.0133	1.61665	0.234983	7.48799	0.31495	178.028
ebi-a-GCST90016993	NMOSD	genus Erysipelatoclostridiumgenus Erysipelatoclostridium|| id:ebi-a-GCST90016993	Weighted median	15	-0.500844	0.546071	0.35905	0.606019	0.207807	1.76731
ebi-a-GCST90016993	NMOSD	genus Erysipelatoclostridiumgenus Erysipelatoclostridium|| id:ebi-a-GCST90016993	Weighted mode	15	-0.580209	0.919071	0.538016	0.559781	0.0924037	3.39115
ebi-a-GCST90016995	NMOSD	genus Escherichia Shigellagenus Escherichia Shigella|| id:ebi-a-GCST90016995	Inverse variance weighted	10	0.264896	0.552132	0.631392	1.30329	0.441629	3.84616
ebi-a-GCST90016995	NMOSD	genus Escherichia Shigellagenus Escherichia Shigella|| id:ebi-a-GCST90016995	MR Egger	10	-2.03131	1.56973	0.231753	0.131164	0.0060483	2.84442
ebi-a-GCST90016995	NMOSD	genus Escherichia Shigellagenus Escherichia Shigella|| id:ebi-a-GCST90016995	Weighted median	10	0.178723	0.734332	0.807709	1.19569	0.283493	5.04306
ebi-a-GCST90016995	NMOSD	genus Escherichia Shigellagenus Escherichia Shigella|| id:ebi-a-GCST90016995	Weighted mode	10	-0.195136	1.03948	0.855256	0.822722	0.107259	6.31065
ebi-a-GCST90016996	NMOSD	genus Eubacterium brachy groupgenus Eubacterium brachy group|| id:ebi-a-GCST90016996	Inverse variance weighted	10	-0.285521	0.335251	0.394401	0.751623	0.389608	1.45001
ebi-a-GCST90016996	NMOSD	genus Eubacterium brachy groupgenus Eubacterium brachy group|| id:ebi-a-GCST90016996	MR Egger	10	1.24331	1.24427	0.346945	3.46709	0.302564	39.7294
ebi-a-GCST90016996	NMOSD	genus Eubacterium brachy groupgenus Eubacterium brachy group|| id:ebi-a-GCST90016996	Weighted median	10	-0.371579	0.445839	0.404598	0.689645	0.287819	1.65246
ebi-a-GCST90016996	NMOSD	genus Eubacterium brachy groupgenus Eubacterium brachy group|| id:ebi-a-GCST90016996	Weighted mode	10	-0.250205	0.685152	0.723411	0.778641	0.203294	2.9823
ebi-a-GCST90016997	NMOSD	genus Eubacterium coprostanoligenes groupgenus Eubacterium coprostanoligenes group|| id:ebi-a-GCST90016997	Inverse variance weighted	13	-0.754077	0.669905	0.260315	0.470445	0.126553	1.74881
ebi-a-GCST90016997	NMOSD	genus Eubacterium coprostanoligenes groupgenus Eubacterium coprostanoligenes group|| id:ebi-a-GCST90016997	MR Egger	13	0.961004	2.72731	0.731225	2.61432	0.0124687	548.145
ebi-a-GCST90016997	NMOSD	genus Eubacterium coprostanoligenes groupgenus Eubacterium coprostanoligenes group|| id:ebi-a-GCST90016997	Weighted median	13	-0.584943	0.841579	0.487021	0.557137	0.107052	2.89954
ebi-a-GCST90016997	NMOSD	genus Eubacterium coprostanoligenes groupgenus Eubacterium coprostanoligenes group|| id:ebi-a-GCST90016997	Weighted mode	13	-0.728085	1.52675	0.642012	0.482833	0.0242213	9.6249
ebi-a-GCST90016998	NMOSD	genus Eubacterium eligens groupgenus Eubacterium eligens group|| id:ebi-a-GCST90016998	Inverse variance weighted	7	0.202251	0.759925	0.790127	1.22416	0.276042	5.42872
ebi-a-GCST90016998	NMOSD	genus Eubacterium eligens groupgenus Eubacterium eligens group|| id:ebi-a-GCST90016998	MR Egger	7	-1.45932	3.01359	0.648677	0.232395	0.000632426	85.3973
ebi-a-GCST90016998	NMOSD	genus Eubacterium eligens groupgenus Eubacterium eligens group|| id:ebi-a-GCST90016998	Weighted median	7	0.391354	0.958373	0.683015	1.47898	0.226037	9.67714
ebi-a-GCST90016998	NMOSD	genus Eubacterium eligens groupgenus Eubacterium eligens group|| id:ebi-a-GCST90016998	Weighted mode	7	0.691256	1.31419	0.617759	1.99622	0.151896	26.2344
ebi-a-GCST90016999	NMOSD	genus Eubacterium fissicatena groupgenus Eubacterium fissicatena group|| id:ebi-a-GCST90016999	Inverse variance weighted	9	-0.138311	0.344536	0.688096	0.870828	0.443259	1.71083
ebi-a-GCST90016999	NMOSD	genus Eubacterium fissicatena groupgenus Eubacterium fissicatena group|| id:ebi-a-GCST90016999	MR Egger	9	1.05016	1.82591	0.583199	2.85812	0.0797684	102.407
ebi-a-GCST90016999	NMOSD	genus Eubacterium fissicatena groupgenus Eubacterium fissicatena group|| id:ebi-a-GCST90016999	Weighted median	9	-0.0752008	0.450783	0.867509	0.927557	0.383377	2.24416
ebi-a-GCST90016999	NMOSD	genus Eubacterium fissicatena groupgenus Eubacterium fissicatena group|| id:ebi-a-GCST90016999	Weighted mode	9	-0.0838156	0.687769	0.906011	0.919601	0.238868	3.5403
ebi-a-GCST90017000	NMOSD	genus Eubacterium hallii groupgenus Eubacterium hallii group|| id:ebi-a-GCST90017000	Inverse variance weighted	15	-0.431981	0.478632	0.366774	0.649222	0.254082	1.65887
ebi-a-GCST90017000	NMOSD	genus Eubacterium hallii groupgenus Eubacterium hallii group|| id:ebi-a-GCST90017000	MR Egger	15	0.401634	0.991816	0.6921	1.49426	0.213883	10.4395
ebi-a-GCST90017000	NMOSD	genus Eubacterium hallii groupgenus Eubacterium hallii group|| id:ebi-a-GCST90017000	Weighted median	15	0.159908	0.65256	0.80642	1.1734	0.32657	4.21617
ebi-a-GCST90017000	NMOSD	genus Eubacterium hallii groupgenus Eubacterium hallii group|| id:ebi-a-GCST90017000	Weighted mode	15	0.229181	0.834157	0.787525	1.25757	0.245179	6.45031
ebi-a-GCST90017001	NMOSD	genus Eubacterium nodatum groupgenus Eubacterium nodatum group|| id:ebi-a-GCST90017001	Inverse variance weighted	11	0.199342	0.372085	0.592136	1.2206	0.588638	2.53103
ebi-a-GCST90017001	NMOSD	genus Eubacterium nodatum groupgenus Eubacterium nodatum group|| id:ebi-a-GCST90017001	MR Egger	11	1.30048	1.7048	0.465087	3.67105	0.129907	103.74
ebi-a-GCST90017001	NMOSD	genus Eubacterium nodatum groupgenus Eubacterium nodatum group|| id:ebi-a-GCST90017001	Weighted median	11	-0.033484	0.445884	0.940139	0.96707	0.403565	2.31741
ebi-a-GCST90017001	NMOSD	genus Eubacterium nodatum groupgenus Eubacterium nodatum group|| id:ebi-a-GCST90017001	Weighted mode	11	-0.0721504	0.724345	0.922624	0.930391	0.224952	3.84805
ebi-a-GCST90017002	NMOSD	genus Eubacterium oxidoreducens groupgenus Eubacterium oxidoreducens group|| id:ebi-a-GCST90017002	Inverse variance weighted	5	0.559641	0.516544	0.278617	1.75004	0.635854	4.8166
ebi-a-GCST90017002	NMOSD	genus Eubacterium oxidoreducens groupgenus Eubacterium oxidoreducens group|| id:ebi-a-GCST90017002	MR Egger	5	0.364082	1.686	0.84288	1.43919	0.0528407	39.1985
ebi-a-GCST90017002	NMOSD	genus Eubacterium oxidoreducens groupgenus Eubacterium oxidoreducens group|| id:ebi-a-GCST90017002	Weighted median	5	0.607775	0.670866	0.364959	1.83634	0.493061	6.83922
ebi-a-GCST90017002	NMOSD	genus Eubacterium oxidoreducens groupgenus Eubacterium oxidoreducens group|| id:ebi-a-GCST90017002	Weighted mode	5	0.776431	0.818048	0.396301	2.1737	0.437384	10.8028
ebi-a-GCST90017003	NMOSD	genus Eubacterium rectale groupgenus Eubacterium rectale group|| id:ebi-a-GCST90017003	Inverse variance weighted	8	1.49848	0.76029	0.0487315	4.47489	1.00835	19.8588
ebi-a-GCST90017003	NMOSD	genus Eubacterium rectale groupgenus Eubacterium rectale group|| id:ebi-a-GCST90017003	MR Egger	8	-3.45835	2.67826	0.244125	0.0314817	0.000165301	5.99573
ebi-a-GCST90017003	NMOSD	genus Eubacterium rectale groupgenus Eubacterium rectale group|| id:ebi-a-GCST90017003	Weighted median	8	1.64879	1.01731	0.105075	5.20068	0.708122	38.1955
ebi-a-GCST90017003	NMOSD	genus Eubacterium rectale groupgenus Eubacterium rectale group|| id:ebi-a-GCST90017003	Weighted mode	8	1.94944	1.75305	0.302852	7.02479	0.226156	218.202
ebi-a-GCST90017004	NMOSD	genus Eubacterium ruminantium groupgenus Eubacterium ruminantium group|| id:ebi-a-GCST90017004	Inverse variance weighted	18	-0.215331	0.353834	0.542812	0.806274	0.402989	1.61314
ebi-a-GCST90017004	NMOSD	genus Eubacterium ruminantium groupgenus Eubacterium ruminantium group|| id:ebi-a-GCST90017004	MR Egger	18	-2.21484	1.17903	0.0786538	0.109171	0.0108268	1.10081
ebi-a-GCST90017004	NMOSD	genus Eubacterium ruminantium groupgenus Eubacterium ruminantium group|| id:ebi-a-GCST90017004	Weighted median	18	-0.609635	0.484662	0.208444	0.543549	0.210226	1.40537
ebi-a-GCST90017004	NMOSD	genus Eubacterium ruminantium groupgenus Eubacterium ruminantium group|| id:ebi-a-GCST90017004	Weighted mode	18	-0.924767	1.02589	0.379953	0.396624	0.0531039	2.96232
ebi-a-GCST90017005	NMOSD	genus Eubacterium ventriosum groupgenus Eubacterium ventriosum group|| id:ebi-a-GCST90017005	Inverse variance weighted	15	0.349138	0.661012	0.59737	1.41784	0.388118	5.17957
ebi-a-GCST90017005	NMOSD	genus Eubacterium ventriosum groupgenus Eubacterium ventriosum group|| id:ebi-a-GCST90017005	MR Egger	15	-3.49298	2.88298	0.247234	0.03041	0.000106898	8.6509
ebi-a-GCST90017005	NMOSD	genus Eubacterium ventriosum groupgenus Eubacterium ventriosum group|| id:ebi-a-GCST90017005	Weighted median	15	0.504361	0.748903	0.500651	1.65593	0.38156	7.18654
ebi-a-GCST90017005	NMOSD	genus Eubacterium ventriosum groupgenus Eubacterium ventriosum group|| id:ebi-a-GCST90017005	Weighted mode	15	0.851622	1.2718	0.513992	2.34344	0.193767	28.342
ebi-a-GCST90017006	NMOSD	genus Eubacterium xylanophilum groupgenus Eubacterium xylanophilum group|| id:ebi-a-GCST90017006	Inverse variance weighted	9	1.29831	0.622624	0.0370486	3.66311	1.08109	12.4119
ebi-a-GCST90017006	NMOSD	genus Eubacterium xylanophilum groupgenus Eubacterium xylanophilum group|| id:ebi-a-GCST90017006	MR Egger	9	0.428072	2.04113	0.839858	1.5343	0.0280841	83.8218
ebi-a-GCST90017006	NMOSD	genus Eubacterium xylanophilum groupgenus Eubacterium xylanophilum group|| id:ebi-a-GCST90017006	Weighted median	9	1.63195	0.825744	0.048116	5.11385	1.01359	25.8009
ebi-a-GCST90017006	NMOSD	genus Eubacterium xylanophilum groupgenus Eubacterium xylanophilum group|| id:ebi-a-GCST90017006	Weighted mode	9	2.10332	1.32609	0.151375	8.19335	0.609079	110.217
ebi-a-GCST90017007	NMOSD	genus Faecalibacteriumgenus Faecalibacterium|| id:ebi-a-GCST90017007	Inverse variance weighted	10	-0.365379	0.65894	0.57924	0.693933	0.190729	2.52475
ebi-a-GCST90017007	NMOSD	genus Faecalibacteriumgenus Faecalibacterium|| id:ebi-a-GCST90017007	MR Egger	10	-0.0576967	1.34568	0.966852	0.943936	0.0675268	13.195
ebi-a-GCST90017007	NMOSD	genus Faecalibacteriumgenus Faecalibacterium|| id:ebi-a-GCST90017007	Weighted median	10	0.00396194	0.765504	0.99587	1.00397	0.223929	4.50123
ebi-a-GCST90017007	NMOSD	genus Faecalibacteriumgenus Faecalibacterium|| id:ebi-a-GCST90017007	Weighted mode	10	-0.176044	0.922841	0.852945	0.838581	0.137406	5.1178
ebi-a-GCST90017008	NMOSD	genus Family XIII AD3011 groupgenus Family XIII AD3011 group|| id:ebi-a-GCST90017008	Inverse variance weighted	11	-0.0418639	0.822347	0.959399	0.959	0.191347	4.80634
ebi-a-GCST90017008	NMOSD	genus Family XIII AD3011 groupgenus Family XIII AD3011 group|| id:ebi-a-GCST90017008	MR Egger	11	0.316692	3.97819	0.938292	1.37258	0.000563937	3340.76
ebi-a-GCST90017008	NMOSD	genus Family XIII AD3011 groupgenus Family XIII AD3011 group|| id:ebi-a-GCST90017008	Weighted median	11	-0.198393	0.828199	0.810681	0.820047	0.161757	4.15734
ebi-a-GCST90017008	NMOSD	genus Family XIII AD3011 groupgenus Family XIII AD3011 group|| id:ebi-a-GCST90017008	Weighted mode	11	-0.165367	1.07042	0.880298	0.847582	0.103998	6.90778
ebi-a-GCST90017009	NMOSD	genus Family XIII UCG001genus Family XIII UCG001|| id:ebi-a-GCST90017009	Inverse variance weighted	8	-0.252119	0.672673	0.707808	0.777152	0.207929	2.90467
ebi-a-GCST90017009	NMOSD	genus Family XIII UCG001genus Family XIII UCG001|| id:ebi-a-GCST90017009	MR Egger	8	-0.199755	2.02977	0.92481	0.818932	0.0153276	43.7542
ebi-a-GCST90017009	NMOSD	genus Family XIII UCG001genus Family XIII UCG001|| id:ebi-a-GCST90017009	Weighted median	8	-0.552799	0.819495	0.499955	0.575337	0.115439	2.86742
ebi-a-GCST90017009	NMOSD	genus Family XIII UCG001genus Family XIII UCG001|| id:ebi-a-GCST90017009	Weighted mode	8	-0.663095	1.16789	0.587929	0.515254	0.0522271	5.08332
ebi-a-GCST90017010	NMOSD	genus Flavonifractorgenus Flavonifractor|| id:ebi-a-GCST90017010	Inverse variance weighted	5	0.475199	0.716852	0.507397	1.60833	0.39462	6.555
ebi-a-GCST90017010	NMOSD	genus Flavonifractorgenus Flavonifractor|| id:ebi-a-GCST90017010	MR Egger	5	-4.34386	2.88706	0.229484	0.0129863	4.5287e-05	3.72392
ebi-a-GCST90017010	NMOSD	genus Flavonifractorgenus Flavonifractor|| id:ebi-a-GCST90017010	Weighted median	5	1.15955	0.950053	0.22227	3.18851	0.49532	20.5253
ebi-a-GCST90017010	NMOSD	genus Flavonifractorgenus Flavonifractor|| id:ebi-a-GCST90017010	Weighted mode	5	1.52262	1.40291	0.33881	4.58422	0.293147	71.688
ebi-a-GCST90017011	NMOSD	genus Fusicatenibactergenus Fusicatenibacter|| id:ebi-a-GCST90017011	Inverse variance weighted	18	-0.050736	0.515337	0.921573	0.95053	0.34618	2.60993
ebi-a-GCST90017011	NMOSD	genus Fusicatenibactergenus Fusicatenibacter|| id:ebi-a-GCST90017011	MR Egger	18	2.57626	2.0719	0.23162	13.1479	0.226581	762.938
ebi-a-GCST90017011	NMOSD	genus Fusicatenibactergenus Fusicatenibacter|| id:ebi-a-GCST90017011	Weighted median	18	-0.281358	0.671215	0.675087	0.754758	0.202516	2.81292
ebi-a-GCST90017011	NMOSD	genus Fusicatenibactergenus Fusicatenibacter|| id:ebi-a-GCST90017011	Weighted mode	18	-0.216944	1.16518	0.854501	0.804975	0.0820274	7.89962
ebi-a-GCST90017012	NMOSD	genus Gordonibactergenus Gordonibacter|| id:ebi-a-GCST90017012	Inverse variance weighted	11	-0.320866	0.37854	0.396639	0.725521	0.345485	1.5236
ebi-a-GCST90017012	NMOSD	genus Gordonibactergenus Gordonibacter|| id:ebi-a-GCST90017012	MR Egger	11	2.49581	1.39582	0.1074	12.1316	0.786631	187.095
ebi-a-GCST90017012	NMOSD	genus Gordonibactergenus Gordonibacter|| id:ebi-a-GCST90017012	Weighted median	11	-0.114547	0.450655	0.799358	0.89177	0.368678	2.15704
ebi-a-GCST90017012	NMOSD	genus Gordonibactergenus Gordonibacter|| id:ebi-a-GCST90017012	Weighted mode	11	-0.127611	0.715634	0.862033	0.880195	0.216481	3.57881
ebi-a-GCST90017013	NMOSD	genus Haemophilusgenus Haemophilus|| id:ebi-a-GCST90017013	Inverse variance weighted	9	-0.418533	0.437148	0.338357	0.658012	0.279335	1.55003
ebi-a-GCST90017013	NMOSD	genus Haemophilusgenus Haemophilus|| id:ebi-a-GCST90017013	MR Egger	9	-0.0941595	1.01332	0.928569	0.910138	0.124897	6.63229
ebi-a-GCST90017013	NMOSD	genus Haemophilusgenus Haemophilus|| id:ebi-a-GCST90017013	Weighted median	9	-0.379691	0.543621	0.484897	0.684073	0.235701	1.98537
ebi-a-GCST90017013	NMOSD	genus Haemophilusgenus Haemophilus|| id:ebi-a-GCST90017013	Weighted mode	9	-0.402932	0.750595	0.605997	0.668357	0.153493	2.91024
ebi-a-GCST90017014	NMOSD	genus Holdemanellagenus Holdemanella|| id:ebi-a-GCST90017014	Inverse variance weighted	11	0.348748	0.464446	0.452719	1.41729	0.570315	3.52212
ebi-a-GCST90017014	NMOSD	genus Holdemanellagenus Holdemanella|| id:ebi-a-GCST90017014	MR Egger	11	0.431248	1.44652	0.772374	1.53918	0.0903617	26.2176
ebi-a-GCST90017014	NMOSD	genus Holdemanellagenus Holdemanella|| id:ebi-a-GCST90017014	Weighted median	11	0.147451	0.57023	0.795958	1.15888	0.379008	3.54345
ebi-a-GCST90017014	NMOSD	genus Holdemanellagenus Holdemanella|| id:ebi-a-GCST90017014	Weighted mode	11	0.0740462	0.770178	0.925308	1.07686	0.237995	4.87245
ebi-a-GCST90017015	NMOSD	genus Holdemaniagenus Holdemania|| id:ebi-a-GCST90017015	Inverse variance weighted	15	-0.170143	0.38801	0.661023	0.843544	0.3943	1.80463
ebi-a-GCST90017015	NMOSD	genus Holdemaniagenus Holdemania|| id:ebi-a-GCST90017015	MR Egger	15	1.58178	1.13422	0.186513	4.86361	0.526609	44.9189
ebi-a-GCST90017015	NMOSD	genus Holdemaniagenus Holdemania|| id:ebi-a-GCST90017015	Weighted median	15	-0.194968	0.532392	0.714207	0.822861	0.289831	2.33619
ebi-a-GCST90017015	NMOSD	genus Holdemaniagenus Holdemania|| id:ebi-a-GCST90017015	Weighted mode	15	-0.0412943	0.827773	0.960918	0.959547	0.189431	4.8605
ebi-a-GCST90017016	NMOSD	genus Howardellagenus Howardella|| id:ebi-a-GCST90017016	Inverse variance weighted	10	0.092559	0.330472	0.779415	1.09698	0.573977	2.09653
ebi-a-GCST90017016	NMOSD	genus Howardellagenus Howardella|| id:ebi-a-GCST90017016	MR Egger	10	0.212084	1.46052	0.888136	1.23625	0.0706128	21.6437
ebi-a-GCST90017016	NMOSD	genus Howardellagenus Howardella|| id:ebi-a-GCST90017016	Weighted median	10	-0.125768	0.436227	0.773111	0.88182	0.375021	2.0735
ebi-a-GCST90017016	NMOSD	genus Howardellagenus Howardella|| id:ebi-a-GCST90017016	Weighted mode	10	-0.272484	0.650583	0.685159	0.761486	0.212752	2.72552
ebi-a-GCST90017017	NMOSD	genus Hungatellagenus Hungatella|| id:ebi-a-GCST90017017	Inverse variance weighted	5	-0.579902	0.484503	0.231345	0.559953	0.216638	1.44733
ebi-a-GCST90017017	NMOSD	genus Hungatellagenus Hungatella|| id:ebi-a-GCST90017017	MR Egger	5	-4.7147	3.04665	0.219486	0.00896259	2.28598e-05	3.51394
ebi-a-GCST90017017	NMOSD	genus Hungatellagenus Hungatella|| id:ebi-a-GCST90017017	Weighted median	5	-0.609258	0.642851	0.34326	0.543754	0.15424	1.91694
ebi-a-GCST90017017	NMOSD	genus Hungatellagenus Hungatella|| id:ebi-a-GCST90017017	Weighted mode	5	-0.719072	0.80342	0.421369	0.487204	0.100885	2.35286
ebi-a-GCST90017018	NMOSD	genus Intestinibactergenus Intestinibacter|| id:ebi-a-GCST90017018	Inverse variance weighted	14	-1.05359	0.487828	0.0307919	0.348685	0.134025	0.907153
ebi-a-GCST90017018	NMOSD	genus Intestinibactergenus Intestinibacter|| id:ebi-a-GCST90017018	MR Egger	14	0.203906	1.56802	0.898689	1.22618	0.0567324	26.5021
ebi-a-GCST90017018	NMOSD	genus Intestinibactergenus Intestinibacter|| id:ebi-a-GCST90017018	Weighted median	14	-0.998678	0.642056	0.119841	0.368366	0.104653	1.29661
ebi-a-GCST90017018	NMOSD	genus Intestinibactergenus Intestinibacter|| id:ebi-a-GCST90017018	Weighted mode	14	-0.966502	1.07759	0.386074	0.380411	0.046025	3.14422
ebi-a-GCST90017019	NMOSD	genus Intestinimonasgenus Intestinimonas|| id:ebi-a-GCST90017019	Inverse variance weighted	17	0.21597	0.404596	0.593486	1.24106	0.561559	2.7428
ebi-a-GCST90017019	NMOSD	genus Intestinimonasgenus Intestinimonas|| id:ebi-a-GCST90017019	MR Egger	17	-0.496716	1.02074	0.633559	0.608526	0.0823012	4.49937
ebi-a-GCST90017019	NMOSD	genus Intestinimonasgenus Intestinimonas|| id:ebi-a-GCST90017019	Weighted median	17	-0.294984	0.54593	0.588967	0.744543	0.255379	2.17067
ebi-a-GCST90017019	NMOSD	genus Intestinimonasgenus Intestinimonas|| id:ebi-a-GCST90017019	Weighted mode	17	-0.609134	0.95234	0.531473	0.543821	0.0841023	3.51645
ebi-a-GCST90017020	NMOSD	genus Lachnoclostridiumgenus Lachnoclostridium|| id:ebi-a-GCST90017020	Inverse variance weighted	12	-0.254081	0.649339	0.695581	0.775629	0.217233	2.76938
ebi-a-GCST90017020	NMOSD	genus Lachnoclostridiumgenus Lachnoclostridium|| id:ebi-a-GCST90017020	MR Egger	12	2.40726	2.35203	0.3302	11.1035	0.110503	1115.69
ebi-a-GCST90017020	NMOSD	genus Lachnoclostridiumgenus Lachnoclostridium|| id:ebi-a-GCST90017020	Weighted median	12	-1.05226	0.882586	0.233165	0.349149	0.0619068	1.96917
ebi-a-GCST90017020	NMOSD	genus Lachnoclostridiumgenus Lachnoclostridium|| id:ebi-a-GCST90017020	Weighted mode	12	-1.28982	1.35071	0.360134	0.275321	0.0195026	3.88674
ebi-a-GCST90017021	NMOSD	genus Lachnospiraceae FCS020 groupgenus Lachnospiraceae FCS020 group|| id:ebi-a-GCST90017021	Inverse variance weighted	12	0.0257949	0.517168	0.96022	1.02613	0.372375	2.82765
ebi-a-GCST90017021	NMOSD	genus Lachnospiraceae FCS020 groupgenus Lachnospiraceae FCS020 group|| id:ebi-a-GCST90017021	MR Egger	12	0.281322	1.32202	0.835761	1.32488	0.0992767	17.681
ebi-a-GCST90017021	NMOSD	genus Lachnospiraceae FCS020 groupgenus Lachnospiraceae FCS020 group|| id:ebi-a-GCST90017021	Weighted median	12	-0.324964	0.703527	0.644148	0.722553	0.181976	2.86896
ebi-a-GCST90017021	NMOSD	genus Lachnospiraceae FCS020 groupgenus Lachnospiraceae FCS020 group|| id:ebi-a-GCST90017021	Weighted mode	12	-0.430589	1.04435	0.688037	0.650126	0.0839523	5.03458
ebi-a-GCST90017022	NMOSD	genus Lachnospiraceae NC2004 groupgenus Lachnospiraceae NC2004 group|| id:ebi-a-GCST90017022	Inverse variance weighted	9	0.23584	0.436044	0.588602	1.26597	0.538587	2.97572
ebi-a-GCST90017022	NMOSD	genus Lachnospiraceae NC2004 groupgenus Lachnospiraceae NC2004 group|| id:ebi-a-GCST90017022	MR Egger	9	-0.689561	1.81709	0.715577	0.501797	0.0142492	17.6711
ebi-a-GCST90017022	NMOSD	genus Lachnospiraceae NC2004 groupgenus Lachnospiraceae NC2004 group|| id:ebi-a-GCST90017022	Weighted median	9	0.142998	0.539523	0.790974	1.15373	0.40073	3.32165
ebi-a-GCST90017022	NMOSD	genus Lachnospiraceae NC2004 groupgenus Lachnospiraceae NC2004 group|| id:ebi-a-GCST90017022	Weighted mode	9	-0.187241	0.855966	0.832324	0.829244	0.154906	4.4391
ebi-a-GCST90017023	NMOSD	genus Lachnospiraceae ND3007 groupgenus Lachnospiraceae ND3007 group|| id:ebi-a-GCST90017023	Inverse variance weighted	3	0.882615	1.54336	0.567403	2.41721	0.117377	49.779
ebi-a-GCST90017023	NMOSD	genus Lachnospiraceae ND3007 groupgenus Lachnospiraceae ND3007 group|| id:ebi-a-GCST90017023	MR Egger	3	36.8072	22.0141	0.343148	9664249013683020	0.00176352	5.29609e+34
ebi-a-GCST90017023	NMOSD	genus Lachnospiraceae ND3007 groupgenus Lachnospiraceae ND3007 group|| id:ebi-a-GCST90017023	Weighted median	3	0.415659	1.75502	0.812781	1.51537	0.0485979	47.2519
ebi-a-GCST90017023	NMOSD	genus Lachnospiraceae ND3007 groupgenus Lachnospiraceae ND3007 group|| id:ebi-a-GCST90017023	Weighted mode	3	-0.0310428	2.00648	0.989061	0.969434	0.018992	49.484
ebi-a-GCST90017024	NMOSD	genus Lachnospiraceae NK4A136 groupgenus Lachnospiraceae NK4A136 group|| id:ebi-a-GCST90017024	Inverse variance weighted	14	0.274293	0.51266	0.592623	1.3156	0.481658	3.59343
ebi-a-GCST90017024	NMOSD	genus Lachnospiraceae NK4A136 groupgenus Lachnospiraceae NK4A136 group|| id:ebi-a-GCST90017024	MR Egger	14	0.36788	1.11616	0.747389	1.44467	0.162058	12.8785
ebi-a-GCST90017024	NMOSD	genus Lachnospiraceae NK4A136 groupgenus Lachnospiraceae NK4A136 group|| id:ebi-a-GCST90017024	Weighted median	14	0.467462	0.708552	0.509419	1.59594	0.398002	6.39952
ebi-a-GCST90017024	NMOSD	genus Lachnospiraceae NK4A136 groupgenus Lachnospiraceae NK4A136 group|| id:ebi-a-GCST90017024	Weighted mode	14	0.0433186	1.04038	0.967421	1.04427	0.135901	8.02421
ebi-a-GCST90017025	NMOSD	genus Lachnospiraceae UCG001genus Lachnospiraceae UCG001|| id:ebi-a-GCST90017025	Inverse variance weighted	12	0.362959	0.508736	0.475566	1.43758	0.530378	3.89651
ebi-a-GCST90017025	NMOSD	genus Lachnospiraceae UCG001genus Lachnospiraceae UCG001|| id:ebi-a-GCST90017025	MR Egger	12	-2.72595	2.17609	0.238822	0.065484	0.000920049	4.66078
ebi-a-GCST90017025	NMOSD	genus Lachnospiraceae UCG001genus Lachnospiraceae UCG001|| id:ebi-a-GCST90017025	Weighted median	12	-0.137754	0.683274	0.840223	0.871313	0.228328	3.32498
ebi-a-GCST90017025	NMOSD	genus Lachnospiraceae UCG001genus Lachnospiraceae UCG001|| id:ebi-a-GCST90017025	Weighted mode	12	-0.40403	1.02511	0.701016	0.667624	0.0895244	4.97877
ebi-a-GCST90017026	NMOSD	genus Lachnospiraceae UCG004genus Lachnospiraceae UCG004|| id:ebi-a-GCST90017026	Inverse variance weighted	12	0.465743	0.569188	0.41321	1.5932	0.522116	4.86151
ebi-a-GCST90017026	NMOSD	genus Lachnospiraceae UCG004genus Lachnospiraceae UCG004|| id:ebi-a-GCST90017026	MR Egger	12	0.264651	2.1778	0.905685	1.30298	0.0182456	93.0497
ebi-a-GCST90017026	NMOSD	genus Lachnospiraceae UCG004genus Lachnospiraceae UCG004|| id:ebi-a-GCST90017026	Weighted median	12	0.624004	0.695485	0.369601	1.86639	0.477521	7.29475
ebi-a-GCST90017026	NMOSD	genus Lachnospiraceae UCG004genus Lachnospiraceae UCG004|| id:ebi-a-GCST90017026	Weighted mode	12	0.785773	1.14464	0.506624	2.1941	0.232765	20.6821
ebi-a-GCST90017027	NMOSD	genus Lachnospiraceae UCG008genus Lachnospiraceae UCG008|| id:ebi-a-GCST90017027	Inverse variance weighted	11	-0.507982	0.403369	0.207905	0.601709	0.272917	1.3266
ebi-a-GCST90017027	NMOSD	genus Lachnospiraceae UCG008genus Lachnospiraceae UCG008|| id:ebi-a-GCST90017027	MR Egger	11	-0.72353	2.10306	0.738721	0.485037	0.00786342	29.9184
ebi-a-GCST90017027	NMOSD	genus Lachnospiraceae UCG008genus Lachnospiraceae UCG008|| id:ebi-a-GCST90017027	Weighted median	11	-0.765651	0.513936	0.136282	0.465031	0.169829	1.27337
ebi-a-GCST90017027	NMOSD	genus Lachnospiraceae UCG008genus Lachnospiraceae UCG008|| id:ebi-a-GCST90017027	Weighted mode	11	-0.941775	0.856762	0.297429	0.389935	0.0727279	2.09066
ebi-a-GCST90017028	NMOSD	genus Lachnospiraceae UCG010genus Lachnospiraceae UCG010|| id:ebi-a-GCST90017028	Inverse variance weighted	10	0.428736	0.553929	0.438936	1.53532	0.518422	4.54686
ebi-a-GCST90017028	NMOSD	genus Lachnospiraceae UCG010genus Lachnospiraceae UCG010|| id:ebi-a-GCST90017028	MR Egger	10	-0.0764255	1.4835	0.960177	0.926422	0.0505855	16.9665
ebi-a-GCST90017028	NMOSD	genus Lachnospiraceae UCG010genus Lachnospiraceae UCG010|| id:ebi-a-GCST90017028	Weighted median	10	0.388186	0.718067	0.588785	1.4743	0.360874	6.02306
ebi-a-GCST90017028	NMOSD	genus Lachnospiraceae UCG010genus Lachnospiraceae UCG010|| id:ebi-a-GCST90017028	Weighted mode	10	0.0390611	1.05009	0.971139	1.03983	0.132772	8.14368
ebi-a-GCST90017030	NMOSD	genus Lactobacillusgenus Lactobacillus|| id:ebi-a-GCST90017030	Inverse variance weighted	8	-0.377952	0.456832	0.408049	0.685263	0.279894	1.67773
ebi-a-GCST90017030	NMOSD	genus Lactobacillusgenus Lactobacillus|| id:ebi-a-GCST90017030	MR Egger	8	0.662701	1.27515	0.621877	1.94002	0.159361	23.6175
ebi-a-GCST90017030	NMOSD	genus Lactobacillusgenus Lactobacillus|| id:ebi-a-GCST90017030	Weighted median	8	-0.031211	0.603629	0.958763	0.969271	0.29691	3.16421
ebi-a-GCST90017030	NMOSD	genus Lactobacillusgenus Lactobacillus|| id:ebi-a-GCST90017030	Weighted mode	8	0.14822	0.767897	0.852424	1.15977	0.257468	5.22418
ebi-a-GCST90017031	NMOSD	genus Lactococcusgenus Lactococcus|| id:ebi-a-GCST90017031	Inverse variance weighted	8	0.111043	0.366424	0.761855	1.11744	0.544903	2.29156
ebi-a-GCST90017031	NMOSD	genus Lactococcusgenus Lactococcus|| id:ebi-a-GCST90017031	MR Egger	8	0.113729	1.66534	0.947772	1.12045	0.0428379	29.306
ebi-a-GCST90017031	NMOSD	genus Lactococcusgenus Lactococcus|| id:ebi-a-GCST90017031	Weighted median	8	0.144856	0.470419	0.758136	1.15587	0.459707	2.90629
ebi-a-GCST90017031	NMOSD	genus Lactococcusgenus Lactococcus|| id:ebi-a-GCST90017031	Weighted mode	8	-0.509535	0.709548	0.495951	0.600775	0.149531	2.41374
ebi-a-GCST90017032	NMOSD	genus Marvinbryantiagenus Marvinbryantia|| id:ebi-a-GCST90017032	Inverse variance weighted	10	0.183281	0.551984	0.739858	1.20115	0.407136	3.54369
ebi-a-GCST90017032	NMOSD	genus Marvinbryantiagenus Marvinbryantia|| id:ebi-a-GCST90017032	MR Egger	10	1.50356	2.17739	0.509393	4.49769	0.0630315	320.938
ebi-a-GCST90017032	NMOSD	genus Marvinbryantiagenus Marvinbryantia|| id:ebi-a-GCST90017032	Weighted median	10	0.242727	0.750872	0.746499	1.27472	0.29259	5.55354
ebi-a-GCST90017032	NMOSD	genus Marvinbryantiagenus Marvinbryantia|| id:ebi-a-GCST90017032	Weighted mode	10	1.6254	1.38744	0.271473	5.08043	0.334881	77.0744
ebi-a-GCST90017033	NMOSD	genus Methanobrevibactergenus Methanobrevibacter|| id:ebi-a-GCST90017033	Inverse variance weighted	6	-0.82371	0.451006	0.0677922	0.438801	0.181286	1.06211
ebi-a-GCST90017033	NMOSD	genus Methanobrevibactergenus Methanobrevibacter|| id:ebi-a-GCST90017033	MR Egger	6	0.996237	1.58672	0.564158	2.70807	0.120787	60.7155
ebi-a-GCST90017033	NMOSD	genus Methanobrevibactergenus Methanobrevibacter|| id:ebi-a-GCST90017033	Weighted median	6	-1.1428	0.53886	0.0339401	0.318923	0.110917	0.917008
ebi-a-GCST90017033	NMOSD	genus Methanobrevibactergenus Methanobrevibacter|| id:ebi-a-GCST90017033	Weighted mode	6	-1.28427	0.857067	0.194291	0.276853	0.051606	1.48525
ebi-a-GCST90017034	NMOSD	genus Odoribactergenus Odoribacter|| id:ebi-a-GCST90017034	Inverse variance weighted	7	0.553829	0.846962	0.513175	1.7399	0.330808	9.1511
ebi-a-GCST90017034	NMOSD	genus Odoribactergenus Odoribacter|| id:ebi-a-GCST90017034	MR Egger	7	0.491353	3.10512	0.88046	1.63453	0.00371759	718.657
ebi-a-GCST90017034	NMOSD	genus Odoribactergenus Odoribacter|| id:ebi-a-GCST90017034	Weighted median	7	1.02111	1.0547	0.332967	2.77627	0.351307	21.94
ebi-a-GCST90017034	NMOSD	genus Odoribactergenus Odoribacter|| id:ebi-a-GCST90017034	Weighted mode	7	1.38517	1.79069	0.468573	3.99552	0.119483	133.61
ebi-a-GCST90017035	NMOSD	genus Olsenellagenus Olsenella|| id:ebi-a-GCST90017035	Inverse variance weighted	10	0.522314	0.325688	0.108775	1.68592	0.890444	3.19205
ebi-a-GCST90017035	NMOSD	genus Olsenellagenus Olsenella|| id:ebi-a-GCST90017035	MR Egger	10	-1.8621	1.51385	0.253625	0.155347	0.00799255	3.01939
ebi-a-GCST90017035	NMOSD	genus Olsenellagenus Olsenella|| id:ebi-a-GCST90017035	Weighted median	10	0.47531	0.4347	0.274209	1.60851	0.686121	3.77093
ebi-a-GCST90017035	NMOSD	genus Olsenellagenus Olsenella|| id:ebi-a-GCST90017035	Weighted mode	10	0.734092	0.708251	0.32702	2.08359	0.51992	8.35002
[truncated: 168 more rows]

## Sheet: Table S4
Table S4: TSMR heterogeneity of inflammatory proteins with NMOSD
id.exposure	outcome	exposure	method	Q	Q_df	Q_pval
[truncated: 385 more rows]

## Sheet: Table S5
Table S5: TSMR pleiotropy of inflammatory proteins with NMOSD
[truncated: 194 more rows]

[truncated: 6 more sheets: Table S6, Table S7, Table S8, Table S9, Table S10, Table S11]
