# Supplementary material for: Exploring the Causal Role of Gut Microbiota and Inflammatory Proteins in Neuromyelitis Optica Spectrum Disorder: a Mendelian randomization study with mediation analysis
Source: Research Square preprint supplement (doi:10.21203/rs.3.rs-5234042/v1), 2024-10-15
Supplement: Supplementary file 3 [file c8b0b87773ab33f2ea216fea.docx]

| **Table 1. Summary results of MR (Target GM on NMOSD).** | | | | | | | | | | | | | | |
| --- | --- | --- | --- | --- | --- | --- | --- | --- | --- | --- | --- | --- | --- | --- |
| **Taxa** |  | **MR analysis** | | | | **Heterogeneity** | | | | **Pleiotropy** | | **MR-PRESSO** | |
| nsnp | MR Egger | | IVW | | MR Egger | | IVW | | MR Egger | | Global Test | |
|  | OR(95%CI) | P-value | OR(95%CI) | P-value | Cochran's Q | P-value | Cochran's Q | P-value | Egger intercept | P-value | RSSobs | P-value |
| Gut microbiota abundance (class Mollicutes id.3920) | 12 | 29.01(1.56, 537.93) | 0.047349818 | 2.73(1.07, 6.99) | 0.035678213 | 6.894275278 | 0.73539 | 9.69586683 | 0.55793 | -0.223424473 | 0.12511 | 11.9479 | 0.54167 |
| Gut microbiota abundance (family Clostridiales vadin BB60 group id.11286) | 14 | 0.21(0.02,2.20) | 0.2164866 | 0.38(0.16,0.88) | 0.024437969 | 9.476005006 | 0.66182 | 9.752735457 | 0.71402 | 0.056775129 | 0.60844 | 11.1548 | 0.735 |
| Gut microbiota abundance (genus Eggerthella id.819) | 10 | 3.99(0.13,124.97) | 0.453391339 | 0.41(0.19,0.88) | 0.021375443 | 3.410768178 | 0.906 | 5.161044527 | 0.82005 | 0.056775129 | 0.60844 | 6.28038 | 0.83633 |
| Gut microbiota abundance (genus Eubacterium rectale group id.14374) | 8 | 0.03(0.00,6.00) | 0.24412496 | 4.47(1.01,19.86) | 0.048731462 | 2.051985676 | 0.91486 | 5.777528075 | 0.56595 | 0.324688325 | 0.10182 | 7.65044 | 0.58233 |
| Gut microbiota abundance (genus Barnesiella id.944) | 14 | 2.21(0.08,62.35) | 0.650809563 | 2.95(1.09,7.98) | 0.033031099 | 7.141866572 | 0.8481 | 7.17374496 | 0.89298 | 0.024370153 | 0.86127 | 8.32371 | 0.904 |
| Gut microbiota abundance (genus Eubacterium xylanophilum group id.14375) | 9 | 1.53(0.03,83.82) | 0.839857522 | 3.66(1.08,12.41) | 0.037048576 | 4.475985902 | 0.72361 | 4.676411546 | 0.79154 | 0.071054185 | 0.6679 | 5.85585 | 0.80733 |
| Gut microbiota abundance (genus Intestinibacter id.11345) | 14 | 1.23(0.06,26.50) | 0.898688623 | 0.35(0.13,0.91) | 0.030791944 | 8.754619238 | 0.72373 | 9.466684906 | 0.73685 | -0.104918179 | 0.41526 | 10.9444 | 0.75933 |
| Gut microbiota abundance (genus Ruminococcus torques group id.14377) | 9 | 6.43(0.16,262.48) | 0.357943225 | 5.05(1.32,19.31) | 0.017903396 | 2.883760422 | 0.89554 | 2.902548715 | 0.94032 | -0.01674617 | 0.89483 | 3.63068 | 0.94933 |
| Gut microbiota abundance (phylum Tenericutes id.3919) | 12 | 29.01(1.56,537.93) | 0.047349818 | 2.73(1.07,6.99) | 0.035678213 | 6.894275278 | 0.73539 | 9.69586683 | 0.55793 | -0.223424473 | 0.12511 | 11.9479 | 0.564 |

**MR, Mendelian randomization; NMOSD, neuromyelitis optica spectrum disorder; GM, gut microbiota; IVW, inverse variance weighted; NSNPs, number of single nucleotide polymorphisms; OR, odds ratio;CI, confidence interval**
